# Supplementary material for: Regulatory T-cells inhibit microglia-induced pain hypersensitivity in female mice
Source: eLife. 2021 Oct 15;10:e69056. doi: 10.7554/eLife.69056 (PMC8639143; doi:10.7554/eLife.69056)
Supplement: Supplementary file 1. [file elife-69056-supp1.xlsx]

## Sheet: MaleCSF1vsMaleControl
Ensembl_ID	Gene_ID	baseMean	log2FoldChange	lfcSE	stat	pvalue	padj
ENSMUSG00000041064	Pif1	98.4101	10.1349	1.11839	9.06207	1.27998e-19	7.24468e-17
ENSMUSG00000026669	Mcm10	144.349	9.96477	1.35737	7.34124	2.11629e-13	4.43155e-11
ENSMUSG00000002944	Cd36	142.538	9.9476	1.14531	8.68554	3.76959e-18	1.77799e-15
ENSMUSG00000002068	Ccne1	132.272	9.8387	1.25409	7.8453	4.31906e-15	1.31342e-12
ENSMUSG00000041431	Ccnb1	216.241	9.82408	1.16078	8.46335	2.59797e-17	1.07594e-14
ENSMUSG00000020808	Pimreg	149.631	9.36387	1.26976	7.37454	1.6491e-13	3.50022e-11
ENSMUSG00000068101	Cenpm	55.1529	9.29899	1.4956	6.21755	5.04981e-10	5.01438e-08
ENSMUSG00000021493	Pdlim7	84.9152	9.19775	1.17244	7.84494	4.33166e-15	1.31342e-12
ENSMUSG00000060591	Ifitm2	50.7701	9.17938	1.19188	7.70157	1.34406e-14	3.45791e-12
ENSMUSG00000103596	NA	83.438	9.17116	2.5935	3.53621	0.000405907	0.00578699
ENSMUSG00000051457	Spn	42.161	8.91238	1.50951	5.90416	3.54439e-09	2.71098e-07
ENSMUSG00000053338	Tarm1	39.6961	8.82731	1.37253	6.4314	1.26438e-10	1.45062e-08
ENSMUSG00000021362	Gcm2	39.6484	8.82542	1.93759	4.55483	5.24272e-06	0.000151914
ENSMUSG00000087213	2810408I11Rik	39.0675	8.80439	1.64782	5.34306	9.1393e-08	4.6324e-06
ENSMUSG00000034883	Lrr1	38.6032	8.78329	1.62003	5.42167	5.9046e-08	3.14295e-06
ENSMUSG00000037095	Lrg1	62.4502	8.75732	1.3035	6.71831	1.83848e-11	2.71456e-09
ENSMUSG00000058773	Hist1h1b	248.843	8.75272	1.0598	8.25885	1.47081e-16	5.80797e-14
ENSMUSG00000109910	NA	37.04	8.72474	1.49501	5.83592	5.34961e-09	3.96666e-07
ENSMUSG00000032586	Traip	59.7188	8.68818	1.39437	6.23089	4.63798e-10	4.63252e-08
ENSMUSG00000039062	Anpep	97.3235	8.65619	1.18058	7.33213	2.26516e-13	4.57886e-11
ENSMUSG00000044303	Cdkn2a	33.613	8.58919	1.65799	5.18048	2.2132e-07	1.00482e-05
ENSMUSG00000048644	Ctxn1	32.3983	8.53478	1.53176	5.57186	2.52029e-08	1.50513e-06
ENSMUSG00000039748	Exo1	105.448	8.49591	1.28473	6.613	3.76601e-11	5.02354e-09
ENSMUSG00000112406	NA	31.2347	8.47836	1.93655	4.37808	1.19731e-05	0.000308972
ENSMUSG00000069300	Hist1h2bj	29.4155	8.39061	1.39958	5.99507	2.03397e-09	1.69298e-07
ENSMUSG00000023031	Cela1	48.2113	8.3805	1.34428	6.2342	4.54086e-10	4.56235e-08
ENSMUSG00000021594	Srd5a1	28.9953	8.37593	1.47968	5.66063	1.50817e-08	9.62736e-07
ENSMUSG00000051378	Kif18b	518.47	8.35654	0.826613	10.1094	5.01995e-24	5.32742e-21
ENSMUSG00000028873	Cdca8	390.374	8.29678	0.767052	10.8164	2.87711e-27	4.07111e-24
ENSMUSG00000042489	Clspn	208.307	8.27191	1.27068	6.50986	7.52226e-11	9.18906e-09
ENSMUSG00000026833	Olfm1	26.78	8.26063	1.77241	4.66068	3.1517e-06	9.80143e-05
ENSMUSG00000093060	Mir5104	25.959	8.21311	1.32937	6.1782	6.48345e-10	6.32696e-08
ENSMUSG00000024989	Cep55	203.48	8.19798	1.02009	8.03656	9.23974e-16	3.20185e-13
ENSMUSG00000068220	Lgals1	41.5751	8.16823	1.28441	6.35951	2.02402e-10	2.23168e-08
ENSMUSG00000087742	NA	24.519	8.1312	2.34662	3.46507	0.000530102	0.0072009
ENSMUSG00000046295	Ankle1	343.004	8.10652	1.79008	4.52857	5.93852e-06	0.000170044
ENSMUSG00000002055	Spag5	170.728	8.07167	1.1839	6.81785	9.24134e-12	1.46652e-09
ENSMUSG00000054150	Syne3	23.4295	8.06266	1.72797	4.66597	3.07171e-06	9.60544e-05
ENSMUSG00000026193	Fn1	5299.91	8.052	1.09747	7.33687	2.18644e-13	4.47298e-11
ENSMUSG00000069310	Hist1h3c	22.9757	8.03323	1.62906	4.93121	8.17237e-07	3.08371e-05
ENSMUSG00000082871	NA	22.5269	8.00829	1.42746	5.61017	2.0213e-08	1.24354e-06
ENSMUSG00000049916	2610318N02Rik	21.9137	7.96773	2.11518	3.76693	0.000165267	0.00281751
ENSMUSG00000046179	E2f8	422.15	7.95706	0.846743	9.39726	5.60031e-21	4.13449e-18
ENSMUSG00000032254	Kif23	580.372	7.95042	0.915143	8.68763	3.70069e-18	1.77799e-15
ENSMUSG00000045045	Lrfn4	56.8572	7.82731	1.58352	4.94298	7.69371e-07	2.94897e-05
ENSMUSG00000023505	Cdca3	345.353	7.78905	0.761202	10.2326	1.41714e-24	1.6042e-21
ENSMUSG00000020330	Hmmr	813.538	7.77894	0.722479	10.767	4.92757e-27	6.43617e-24
ENSMUSG00000020185	E2f7	181.674	7.77883	0.962475	8.08211	6.36566e-16	2.29976e-13
ENSMUSG00000092060	Bend4	18.9275	7.75191	1.66127	4.66627	3.06719e-06	9.60544e-05
ENSMUSG00000020473	Aebp1	30.6866	7.73107	1.42587	5.42199	5.89399e-08	3.14295e-06
ENSMUSG00000053442	NA	18.2205	7.70292	2.17618	3.53966	0.00040064	0.00574567
ENSMUSG00000115306	NA	18.0182	7.68496	2.19894	3.49485	0.000474327	0.00656938
ENSMUSG00000021508	Cxcl14	17.9413	7.68469	1.75335	4.38286	1.17134e-05	0.000302729
ENSMUSG00000040543	Pitpnm3	17.8604	7.67134	1.95707	3.91982	8.86163e-05	0.00169258
ENSMUSG00000099517	Hist1h3g	17.7787	7.66761	2.13163	3.59707	0.000321826	0.00481463
ENSMUSG00000026870	Cutal	17.6708	7.66346	1.66105	4.61362	3.95708e-06	0.000119133
ENSMUSG00000028789	Azin2	28.9644	7.64923	1.23838	6.17679	6.5417e-10	6.34732e-08
ENSMUSG00000113540	NA	28.7582	7.62911	1.32993	5.73647	9.66688e-09	6.48789e-07
ENSMUSG00000035683	Melk	132.409	7.6256	0.977769	7.79898	6.24116e-15	1.76625e-12
ENSMUSG00000068744	Psrc1	44.7589	7.62515	1.49754	5.09179	3.54699e-07	1.53003e-05
ENSMUSG00000020834	Dhrs13	17.1798	7.62292	1.52702	4.99201	5.9753e-07	2.38171e-05
ENSMUSG00000069267	Hist1h3b	17.2475	7.61939	1.51744	5.02123	5.13418e-07	2.07567e-05
ENSMUSG00000032850	Rnft2	27.8098	7.58054	1.32902	5.70387	1.1712e-08	7.70814e-07
ENSMUSG00000038379	Ttk	396.632	7.56792	1.08651	6.96535	3.27591e-12	5.79427e-10
ENSMUSG00000096010	Hist4h4	16.3584	7.54195	1.57696	4.78258	1.73061e-06	5.93652e-05
ENSMUSG00000107730	NA	15.7311	7.48722	2.08659	3.58826	0.00033289	0.00496195
ENSMUSG00000009246	Trpm5	15.1121	7.43651	1.47332	5.04746	4.47729e-07	1.85879e-05
ENSMUSG00000050370	Ch25h	431.297	7.43579	0.934751	7.95483	1.79377e-15	5.85734e-13
ENSMUSG00000007033	Hspa1l	24.2502	7.38397	1.73729	4.25028	2.135e-05	0.000505612
ENSMUSG00000060913	Trim55	14.2891	7.34906	1.67516	4.38709	1.14875e-05	0.000297841
ENSMUSG00000069792	Wfdc17	296.992	7.34249	0.820911	8.94432	3.7424e-19	2.04987e-16
ENSMUSG00000018924	Alox15	23.1483	7.32417	1.90465	3.84541	0.000120352	0.00216481
ENSMUSG00000041498	Kif14	334.192	7.32371	0.937119	7.81513	5.49064e-15	1.58019e-12
ENSMUSG00000021779	Thrb	13.8879	7.31417	1.88047	3.88954	0.000100436	0.00187202
ENSMUSG00000075405	NA	13.7926	7.30005	1.79484	4.06724	4.75731e-05	0.00101001
ENSMUSG00000039814	Xkr5	41.5607	7.26001	1.91331	3.79448	0.000147954	0.00256877
ENSMUSG00000097755	NA	61.0367	7.24493	1.61968	4.47305	7.71112e-06	0.000210311
ENSMUSG00000027469	Tpx2	953.364	7.22866	1.24235	5.81852	5.93698e-09	4.30812e-07
ENSMUSG00000113692	NA	13.0343	7.22261	1.95081	3.70237	0.000213591	0.00349064
ENSMUSG00000075031	Hist1h2bb	150.636	7.21612	0.936651	7.70417	1.31699e-14	3.44039e-12
ENSMUSG00000051611	Olfr112	20.2889	7.12713	1.7716	4.02298	5.74661e-05	0.00117563
ENSMUSG00000037759	Ptger2	12.1056	7.11494	1.58799	4.48046	7.44828e-06	0.000206316
ENSMUSG00000030830	Itgal	149.763	7.10758	0.732212	9.70699	2.81527e-22	2.51596e-19
ENSMUSG00000025494	Sigirr	11.9482	7.09687	1.79012	3.96447	7.35591e-05	0.00145406
ENSMUSG00000076441	Ass1	19.6888	7.08543	1.6369	4.32856	1.50091e-05	0.000371507
ENSMUSG00000039396	Neil3	214.592	7.073	0.97149	7.28057	3.32419e-13	6.4879e-11
ENSMUSG00000052609	Plekhg3	32.8441	7.05159	1.27362	5.53666	3.08293e-08	1.77452e-06
ENSMUSG00000061577	Adgrg5	19.0983	7.04992	1.34473	5.24264	1.58296e-07	7.4046e-06
ENSMUSG00000002289	Angptl4	11.5335	7.04595	1.78731	3.94222	8.07313e-05	0.00155838
ENSMUSG00000012443	Kif11	1264.53	6.96643	0.798939	8.7196	2.79189e-18	1.3943e-15
ENSMUSG00000045328	Cenpe	1242.92	6.96561	1.20657	5.77309	7.78289e-09	5.38783e-07
ENSMUSG00000037466	Tedc1	131.193	6.96517	1.16213	5.99343	2.05466e-09	1.70186e-07
ENSMUSG00000072825	Cep170b	29.8975	6.93683	1.41217	4.91218	9.00709e-07	3.33203e-05
ENSMUSG00000032218	Ccnb2	722.298	6.92555	0.53372	12.976	1.67384e-38	7.10547e-35
ENSMUSG00000117988	NA	69.6453	6.91418	1.04768	6.5995	4.12539e-11	5.38493e-09
ENSMUSG00000034311	Kif4	350.674	6.90413	0.744147	9.27791	1.72836e-20	1.12875e-17
ENSMUSG00000079553	Kifc1	51.3351	6.84901	1.3239	5.17337	2.29905e-07	1.03824e-05
ENSMUSG00000042265	Trem1	41.0033	6.81047	1.49222	4.56399	5.01908e-06	0.000146685
ENSMUSG00000033952	Aspm	1464.39	6.79503	1.12523	6.03879	1.55277e-09	1.36411e-07
ENSMUSG00000062980	Cped1	9.49239	6.7637	1.9182	3.52607	0.000421774	0.00595818
ENSMUSG00000070732	Rbm44	53.6672	6.72283	1.47563	4.5559	5.21625e-06	0.000151405
ENSMUSG00000049539	Hist1h1a	160.936	6.67342	1.21964	5.47165	4.4587e-08	2.46608e-06
ENSMUSG00000108402	NA	21.1834	6.67284	1.77691	3.75529	0.000173138	0.00293109
ENSMUSG00000105954	NA	34.8439	6.65079	1.39715	4.76026	1.93341e-06	6.50085e-05
ENSMUSG00000037544	Dlgap5	491.1	6.63794	1.40898	4.71118	2.46287e-06	8.01141e-05
ENSMUSG00000114279	Hist1h2bm	118.632	6.62032	1.04634	6.32715	2.49734e-10	2.66697e-08
ENSMUSG00000022034	Esco2	199.325	6.60471	0.727788	9.07505	1.13629e-19	6.6532e-17
ENSMUSG00000027331	Knstrn	467.727	6.5884	0.962742	6.84337	7.7353e-12	1.2752e-09
ENSMUSG00000044201	Cdc25c	101.088	6.5842	1.00483	6.55252	5.65748e-11	7.06353e-09
ENSMUSG00000073680	Tmem88b	34.1206	6.58144	1.47622	4.4583	8.26108e-06	0.00022269
ENSMUSG00000035373	Ccl7	43.7002	6.56052	1.51109	4.34159	1.41456e-05	0.000352652
ENSMUSG00000000028	Cdc45	170.255	6.55434	1.09718	5.97383	2.3175e-09	1.90102e-07
ENSMUSG00000042745	Id1	30.9781	6.54196	1.16143	5.63268	1.77428e-08	1.10762e-06
ENSMUSG00000031004	Mki67	7221.06	6.51131	1.10806	5.87631	4.19523e-09	3.166e-07
ENSMUSG00000032911	Cspg4	86.0999	6.50423	1.03546	6.2815	3.35314e-10	3.49303e-08
ENSMUSG00000079298	Klrb1b	32.2014	6.49688	1.08026	6.01421	1.80771e-09	1.53474e-07
ENSMUSG00000027329	Spef1	22.1206	6.48015	1.7361	3.73259	0.000189524	0.00317057
ENSMUSG00000015312	Gadd45b	51.5318	6.47499	1.33158	4.86262	1.15842e-06	4.0979e-05
ENSMUSG00000035455	Fignl1	265.028	6.45217	0.654925	9.85176	6.73508e-23	6.35343e-20
ENSMUSG00000020676	Ccl11	7.68467	6.44841	1.85979	3.46728	0.000525749	0.00715896
ENSMUSG00000060093	Hist1h4a	12.4348	6.40693	1.52409	4.20376	2.62514e-05	0.000602544
ENSMUSG00000109236	NA	112.067	6.36218	1.06783	5.95806	2.55244e-09	2.0737e-07
ENSMUSG00000109873	NA	62.0092	6.30689	1.33868	4.71126	2.46193e-06	8.01141e-05
ENSMUSG00000087408	Gdf1	26.7739	6.29617	1.77799	3.54117	0.00039835	0.00572949
ENSMUSG00000028718	Stil	474.762	6.28355	0.902105	6.96543	3.27408e-12	5.79427e-10
ENSMUSG00000025150	Cbr2	11.39	6.27718	1.62115	3.87206	0.000107919	0.00197672
ENSMUSG00000032783	Troap	281.889	6.27072	0.771305	8.13002	4.29234e-16	1.65645e-13
ENSMUSG00000027313	Chac1	35.2112	6.24209	1.29275	4.82854	1.37535e-06	4.82508e-05
ENSMUSG00000015880	Ncapg	254.721	6.23747	1.10056	5.66753	1.44871e-08	9.31781e-07
ENSMUSG00000078240	NA	10.9116	6.21449	1.78643	3.47873	0.000503803	0.00691558
ENSMUSG00000039055	Eme1	83.2624	6.18271	0.891174	6.93771	3.98497e-12	6.83482e-10
ENSMUSG00000037474	Dtl	482.568	6.17741	0.831083	7.43296	1.06192e-13	2.34174e-11
ENSMUSG00000029516	Cit	547.644	6.1648	0.91567	6.73256	1.66705e-11	2.48302e-09
ENSMUSG00000056370	Sftpb	24.796	6.15978	1.32796	4.63851	3.50923e-06	0.000107605
ENSMUSG00000056531	Ccdc18	136.323	6.15848	1.37198	4.48877	7.16359e-06	0.000199734
ENSMUSG00000020014	Cfap54	10.2495	6.14613	1.50099	4.09473	4.22665e-05	0.000909615
ENSMUSG00000099876	NA	10.1776	6.1337	1.51769	4.04148	5.3115e-05	0.00110662
ENSMUSG00000039981	Zc3h12d	142.708	6.12497	1.01509	6.03395	1.60001e-09	1.38613e-07
ENSMUSG00000020897	Aurkb	532.457	6.11828	1.25325	4.88193	1.05052e-06	3.7792e-05
ENSMUSG00000032181	Scg3	10.1232	6.11237	1.52887	3.99797	6.38887e-05	0.00128687
ENSMUSG00000114761	NA	9.84652	6.07506	1.58911	3.82293	0.000131877	0.00234234
ENSMUSG00000020914	Top2a	2628.33	6.03626	1.44608	4.17423	2.98993e-05	0.00068055
ENSMUSG00000001228	Uhrf1	395.281	6.02095	0.918568	6.55471	5.57497e-11	7.01207e-09
ENSMUSG00000044469	Tnfaip8l1	44.1954	5.98951	1.19418	5.01559	5.28717e-07	2.13245e-05
ENSMUSG00000019845	Tube1	110.367	5.94739	0.882577	6.73867	1.59847e-11	2.40194e-09
ENSMUSG00000102879	NA	8.77941	5.90543	1.48116	3.98703	6.69057e-05	0.00133969
ENSMUSG00000074476	Spc24	100.246	5.9002	0.777069	7.5929	3.1283e-14	7.58836e-12
ENSMUSG00000030752	Kdm8	32.8737	5.89799	1.04237	5.65826	1.52915e-08	9.72472e-07
ENSMUSG00000035365	Parpbp	169.652	5.89732	1.07391	5.49146	3.98618e-08	2.24124e-06
ENSMUSG00000041608	Entpd3	13.7363	5.88641	1.43218	4.11012	3.95461e-05	0.000860888
ENSMUSG00000033847	Pla2g4c	15.4186	5.88187	1.50597	3.90571	9.3951e-05	0.00177607
ENSMUSG00000026525	Opn3	8.57805	5.87039	1.73042	3.39247	0.000692643	0.00899727
ENSMUSG00000026981	Il1rn	680.1	5.83152	1.2608	4.62527	3.7411e-06	0.000113842
ENSMUSG00000027654	Fam83d	75.7484	5.80717	1.2421	4.6753	2.93528e-06	9.29871e-05
ENSMUSG00000029591	Ung	112.055	5.80438	0.955644	6.07378	1.24931e-09	1.12073e-07
ENSMUSG00000004709	Cd244a	1443.05	5.77092	0.485926	11.8761	1.57498e-32	3.82046e-29
ENSMUSG00000037725	Ckap2	253.276	5.76587	0.893741	6.45139	1.10827e-10	1.29782e-08
ENSMUSG00000062727	Hist1h2bk	19.9591	5.76051	1.39505	4.12926	3.63937e-05	0.000808854
ENSMUSG00000059027	NA	25.289	5.75759	1.51297	3.80548	0.000141529	0.00248004
ENSMUSG00000031506	Ptpn7	42.2387	5.73836	1.03192	5.56084	2.68475e-08	1.5884e-06
ENSMUSG00000036306	Lzts1	12.2204	5.71564	1.39312	4.10277	4.08228e-05	0.000881897
ENSMUSG00000040084	Bub1b	664	5.67853	0.730604	7.77238	7.70279e-15	2.10957e-12
ENSMUSG00000017499	Cdc6	77.6581	5.66978	1.11746	5.07381	3.89928e-07	1.65939e-05
ENSMUSG00000002835	Chaf1a	96.9854	5.62702	1.04451	5.38722	7.15549e-08	3.73847e-06
ENSMUSG00000075254	Heg1	62.9626	5.60929	1.20428	4.65778	3.19643e-06	9.92238e-05
ENSMUSG00000023903	Mmp25	49.7425	5.58957	0.986542	5.66582	1.46325e-08	9.37583e-07
ENSMUSG00000103822	NA	13.6694	5.58149	1.51662	3.68023	0.000233026	0.00373986
ENSMUSG00000020732	Rab37	68.7622	5.57042	0.982227	5.67122	1.41788e-08	9.15421e-07
ENSMUSG00000069270	Hist1h2ac	22.3581	5.54427	1.27449	4.35018	1.36023e-05	0.000342174
ENSMUSG00000031016	Wee1	302.406	5.54059	0.921005	6.01581	1.78994e-09	1.52729e-07
ENSMUSG00000024056	Ndc80	364.211	5.52746	0.87319	6.33019	2.44863e-10	2.6315e-08
ENSMUSG00000114456	Hist1h2bh	41.0547	5.52009	1.07181	5.15027	2.60112e-07	1.15621e-05
ENSMUSG00000048922	Cdca2	445.146	5.50392	0.931456	5.90894	3.44307e-09	2.65742e-07
ENSMUSG00000105852	NA	11.1907	5.47132	1.42327	3.8442	0.000120948	0.00217092
ENSMUSG00000029304	Spp1	1330.72	5.43504	1.25574	4.32817	1.50356e-05	0.000371621
ENSMUSG00000039891	Txlnb	48.1778	5.4168	1.36025	3.9822	6.82804e-05	0.0013629
ENSMUSG00000032487	Ptgs2	41.3398	5.41194	1.00317	5.39486	6.85779e-08	3.60512e-06
ENSMUSG00000034773	BC030867	110.006	5.40263	1.52826	3.53515	0.000407547	0.00580116
ENSMUSG00000035352	Ccl12	6315.61	5.39848	0.436676	12.3627	4.16091e-35	1.41305e-31
ENSMUSG00000054932	Afp	10.9162	5.38315	1.53051	3.51722	0.000436087	0.00611024
ENSMUSG00000108640	NA	55.7385	5.36591	1.45937	3.67688	0.000236105	0.00377501
ENSMUSG00000089842	NA	22.5472	5.34939	1.29596	4.12773	3.66366e-05	0.000813188
ENSMUSG00000079053	NA	57.2856	5.33784	1.09574	4.87147	1.10773e-06	3.95151e-05
ENSMUSG00000030103	Bhlhe40	171.018	5.33364	1.29765	4.11021	3.95292e-05	0.000860888
ENSMUSG00000038011	Dnah10	27.918	5.31777	1.11842	4.7547	1.9874e-06	6.6692e-05
ENSMUSG00000100210	Hist1h3f	16.6368	5.31074	1.33623	3.97442	7.05503e-05	0.0014011
ENSMUSG00000022021	Diaph3	324.82	5.30263	1.50911	3.51374	0.000441851	0.00618519
ENSMUSG00000027071	P2rx3	31.1631	5.28345	1.10085	4.79945	1.59105e-06	5.51348e-05
ENSMUSG00000098318	Lockd	149.149	5.27745	0.982174	5.37324	7.73363e-08	4.00357e-06
ENSMUSG00000073418	C4b	337.324	5.2666	1.46588	3.59279	0.000327156	0.00488577
ENSMUSG00000026536	Ifi211	10.9497	5.24263	1.43326	3.65783	0.000254363	0.00397313
ENSMUSG00000045502	Hcar2	1477.47	5.22715	0.649737	8.04504	8.62199e-16	3.05003e-13
ENSMUSG00000115667	Gm10389	103.129	5.21963	0.854349	6.10948	9.99548e-10	9.17423e-08
ENSMUSG00000067455	Hist1h4j	33.449	5.20498	1.17419	4.43284	9.30009e-06	0.000247129
ENSMUSG00000036777	Anln	1094.06	5.17219	1.1159	4.63499	3.56953e-06	0.000109012
ENSMUSG00000107263	NA	46.5701	5.17136	1.462	3.53719	0.00040441	0.00578021
ENSMUSG00000021714	Cenpk	61.055	5.16084	1.14863	4.49306	7.02081e-06	0.000196398
ENSMUSG00000036223	Ska1	74.2848	5.15595	1.50731	3.42062	0.000624775	0.00826847
ENSMUSG00000055333	Fat2	93.0756	5.13775	1.30179	3.94667	7.92457e-05	0.00153606
ENSMUSG00000048327	Ckap2l	425.406	5.12468	1.359	3.77091	0.000162653	0.00278573
ENSMUSG00000026605	Cenpf	1279.7	5.10658	0.528587	9.66081	4.42369e-22	3.75571e-19
ENSMUSG00000097487	Ptges3l	27.0659	5.09531	1.29889	3.92281	8.75228e-05	0.00167358
ENSMUSG00000034317	Trim59	206.108	5.07128	0.872957	5.80932	6.27287e-09	4.49423e-07
ENSMUSG00000100154	NA	21.7436	5.06978	1.1189	4.53102	5.86982e-06	0.000168361
ENSMUSG00000098090	2700099C18Rik	105.05	5.06249	1.01689	4.9784	6.41129e-07	2.52584e-05
ENSMUSG00000050357	Carmil2	48.1222	5.06121	0.873752	5.79251	6.93435e-09	4.8857e-07
ENSMUSG00000020649	Rrm2	343.918	5.05328	1.48958	3.39242	0.000692787	0.00899727
ENSMUSG00000052565	Hist1h1d	137.995	5.02585	1.26389	3.97649	6.99403e-05	0.00139062
ENSMUSG00000052688	Rab7b	134.33	4.99423	0.85686	5.82852	5.59221e-09	4.09292e-07
ENSMUSG00000027326	Knl1	963.398	4.94567	1.18579	4.17078	3.03561e-05	0.000689101
ENSMUSG00000113492	NA	17.3947	4.94448	1.22753	4.02798	5.62575e-05	0.00115648
ENSMUSG00000098678	Mroh6	58.1131	4.93818	0.973786	5.07112	3.95486e-07	1.67465e-05
ENSMUSG00000047534	Mis18bp1	561.616	4.93794	0.630931	7.82644	5.01891e-15	1.46933e-12
ENSMUSG00000035109	Shc4	101.713	4.89918	1.07952	4.53829	5.67128e-06	0.000163217
ENSMUSG00000090027	NA	32.1857	4.87576	1.19881	4.06718	4.75857e-05	0.00101001
ENSMUSG00000024791	Cdca5	161.095	4.86425	1.20524	4.03593	5.4387e-05	0.00112347
ENSMUSG00000106586	NA	16.8788	4.85091	1.08516	4.47023	7.81357e-06	0.000212279
ENSMUSG00000029283	Cdc7	120.15	4.83703	0.865174	5.59082	2.25999e-08	1.37052e-06
ENSMUSG00000031756	Cenpn	129.119	4.8198	0.568801	8.47362	2.37874e-17	1.00978e-14
ENSMUSG00000033031	Cip2a	507.848	4.81644	0.627483	7.67582	1.64369e-14	4.16565e-12
ENSMUSG00000057135	Scimp	53.2638	4.76565	1.16032	4.10719	4.005e-05	0.000868517
ENSMUSG00000007080	Pole	447.984	4.73749	0.770802	6.14618	7.93707e-10	7.44594e-08
ENSMUSG00000021697	Depdc1b	57.2177	4.73668	1.11483	4.24878	2.1494e-05	0.000507606
ENSMUSG00000032216	Nedd4	17.9742	4.71544	1.28378	3.67308	0.000239641	0.00381718
ENSMUSG00000026558	Uck2	155.011	4.70508	0.75153	6.26066	3.83356e-10	3.94502e-08
ENSMUSG00000022322	Shcbp1	206.575	4.69343	0.687572	6.82609	8.72589e-12	1.4111e-09
ENSMUSG00000032860	P2ry2	185.843	4.66191	1.07989	4.31703	1.5814e-05	0.000389726
ENSMUSG00000075266	Cenpw	32.9188	4.64717	1.16227	3.99835	6.37869e-05	0.00128634
ENSMUSG00000105769	NA	28.2097	4.64043	1.04356	4.44671	8.71947e-06	0.000233897
ENSMUSG00000028459	Cd72	1724.42	4.62466	0.540132	8.56208	1.10849e-17	4.82618e-15
ENSMUSG00000050994	Adgb	178.469	4.62327	0.751823	6.14941	7.777e-10	7.37477e-08
ENSMUSG00000072082	Ccnf	568.851	4.61289	0.878565	5.25048	1.51702e-07	7.21539e-06
ENSMUSG00000055737	Ghr	43.2136	4.59964	1.10347	4.16833	3.06844e-05	0.000695622
ENSMUSG00000086050	NA	28.4299	4.59547	1.23195	3.73024	0.000191295	0.00319076
ENSMUSG00000061615	Hist1h2ab	32.031	4.58096	1.27668	3.58819	0.000332985	0.00496195
ENSMUSG00000027715	Ccna2	1068.11	4.53329	1.22539	3.69946	0.000216055	0.00352567
ENSMUSG00000064179	Tnnt1	75.128	4.52232	1.17325	3.85452	0.000115956	0.00210132
ENSMUSG00000078773	Rad54b	122.885	4.51368	1.01227	4.45896	8.23567e-06	0.000222678
ENSMUSG00000049588	Ccdc69	37.4615	4.48314	1.02698	4.36537	1.2691e-05	0.000323079
ENSMUSG00000032400	Zwilch	228.929	4.48085	0.684405	6.54707	5.86759e-11	7.27239e-09
ENSMUSG00000027306	Nusap1	598.427	4.48009	0.715811	6.25875	3.88067e-10	3.94502e-08
ENSMUSG00000003863	Ppfia3	70.6017	4.47731	1.2152	3.68443	0.000229217	0.00369269
ENSMUSG00000042029	Ncapg2	426.259	4.46303	0.908897	4.91038	9.09021e-07	3.35547e-05
ENSMUSG00000026285	Pdcd1	197.709	4.4603	0.80553	5.5371	3.07527e-08	1.77452e-06
ENSMUSG00000039994	Timeless	208.684	4.45176	1.12893	3.94335	8.03514e-05	0.00155529
ENSMUSG00000022033	Pbk	351.834	4.44789	0.970943	4.581	4.62758e-06	0.000136892
ENSMUSG00000027330	Cdc25b	89.6483	4.44318	1.08627	4.0903	4.30824e-05	0.000925999
ENSMUSG00000027580	Helz2	330.108	4.42697	0.892482	4.96029	7.03892e-07	2.72257e-05
ENSMUSG00000105286	NA	31.5748	4.41851	1.1575	3.81729	0.000134925	0.00238396
ENSMUSG00000014786	Slc9a5	93.7307	4.41657	0.933842	4.72946	2.25118e-06	7.42233e-05
ENSMUSG00000037887	Dusp8	37.1805	4.39322	1.0014	4.38706	1.14891e-05	0.000297841
ENSMUSG00000103348	NA	28.5284	4.38969	1.10797	3.96193	7.43475e-05	0.00146453
ENSMUSG00000023830	Igf2r	211.663	4.37371	0.798528	5.47722	4.32067e-08	2.4186e-06
ENSMUSG00000000184	Ccnd2	17.9257	4.37151	1.30019	3.36222	0.000773196	0.00978306
ENSMUSG00000022246	Rai14	1054.2	4.3571	0.708634	6.14858	7.81777e-10	7.37477e-08
ENSMUSG00000032322	Pstpip1	150.361	4.33468	0.706966	6.13139	8.71157e-10	8.12761e-08
ENSMUSG00000112895	NA	110.186	4.33013	1.09814	3.94314	8.04206e-05	0.00155529
ENSMUSG00000041945	Mfsd9	34.0051	4.31275	1.06057	4.06645	4.77352e-05	0.00101191
ENSMUSG00000024053	Emilin2	93.2857	4.28797	0.648495	6.61218	3.78688e-11	5.02354e-09
ENSMUSG00000026039	Sgo2a	183.849	4.26625	0.969568	4.40015	1.08175e-05	0.000283021
ENSMUSG00000027322	Siglec1	336.049	4.26126	0.755581	5.63971	1.70338e-08	1.06728e-06
ENSMUSG00000063021	Hist1h2ak	264.16	4.2557	0.94334	4.51131	6.44295e-06	0.00018264
ENSMUSG00000023908	Pkmyt1	193.897	4.25243	1.25535	3.38746	0.000705429	0.00911582
ENSMUSG00000040312	Cchcr1	97.2787	4.17988	0.782553	5.34134	9.22631e-08	4.66258e-06
ENSMUSG00000031312	Itgb1bp2	21.4132	4.17068	0.958531	4.35112	1.35446e-05	0.000341735
ENSMUSG00000029177	Cenpa	1114.45	4.15767	0.468921	8.86646	7.55084e-19	4.00667e-16
ENSMUSG00000073490	Ifi207	542.058	4.15649	0.732282	5.67608	1.37819e-08	8.96618e-07
ENSMUSG00000069273	Hist1h3e	57.4818	4.09816	0.713011	5.74769	9.04734e-09	6.14495e-07
ENSMUSG00000103999	NA	64.6576	4.06307	1.07996	3.76223	0.000168408	0.00286243
ENSMUSG00000115855	Gm34643	108.642	4.04241	0.776694	5.20464	1.94369e-07	8.91994e-06
ENSMUSG00000024401	Tnf	592.177	4.0313	0.644048	6.25932	3.86656e-10	3.94502e-08
ENSMUSG00000027398	Il1b	173.454	4.01414	0.941945	4.26154	2.03023e-05	0.000482818
ENSMUSG00000038775	Vill	24.0643	4.0005	1.05312	3.79871	0.000145449	0.00253826
ENSMUSG00000027074	Slc43a3	504.718	3.97936	0.629972	6.31673	2.67161e-10	2.83525e-08
ENSMUSG00000079445	B3gnt7	314.528	3.94216	0.682634	5.77493	7.69865e-09	5.35751e-07
ENSMUSG00000026873	Phf19	146.658	3.88542	0.970092	4.00521	6.19637e-05	0.00125255
ENSMUSG00000075463	4930594M22Rik	31.7245	3.87812	0.930689	4.16694	3.08721e-05	0.000698014
ENSMUSG00000005087	Cd44	408.593	3.86308	0.848497	4.55284	5.29256e-06	0.000152836
ENSMUSG00000018470	Kcnab3	37.7945	3.85693	0.751794	5.1303	2.89287e-07	1.27257e-05
ENSMUSG00000074802	Gas2l3	1061.75	3.85498	0.644705	5.97945	2.2389e-09	1.84547e-07
ENSMUSG00000046761	Fam83h	111.81	3.85299	0.841449	4.579	4.67211e-06	0.00013773
ENSMUSG00000030641	Ddias	95.1222	3.80942	0.906603	4.20186	2.64734e-05	0.000606637
ENSMUSG00000028044	Cks1b	157.512	3.7917	0.529256	7.16421	7.82345e-13	1.4598e-10
ENSMUSG00000027323	Rad51	242.589	3.78482	0.587153	6.44606	1.14798e-10	1.33511e-08
ENSMUSG00000009687	Fxyd5	931.98	3.74497	0.502024	7.45975	8.66851e-14	1.93673e-11
ENSMUSG00000005233	Spc25	157.98	3.74485	1.03687	3.6117	0.000304197	0.00461184
ENSMUSG00000025044	Msr1	1436.56	3.74408	0.65342	5.72997	1.00447e-08	6.71495e-07
ENSMUSG00000114828	NA	31.0929	3.73302	0.971566	3.84227	0.000121902	0.00218114
ENSMUSG00000001473	Tubb6	404.689	3.72727	0.39926	9.33543	1.00578e-20	6.83125e-18
ENSMUSG00000029561	Oasl2	539.327	3.71796	0.509085	7.30323	2.80946e-13	5.54706e-11
ENSMUSG00000027635	Dsn1	166.654	3.70385	0.769039	4.8162	1.46314e-06	5.12251e-05
ENSMUSG00000031871	Cdh5	58.2375	3.69743	1.00617	3.67477	0.000238065	0.00379919
ENSMUSG00000034926	Dhcr24	105.216	3.66575	0.709523	5.16651	2.38508e-07	1.07423e-05
ENSMUSG00000039959	Hip1	506.986	3.65803	0.768079	4.76257	1.91138e-06	6.45235e-05
ENSMUSG00000059089	Fcgr4	859.037	3.64667	0.377905	9.6497	4.93008e-22	3.80513e-19
ENSMUSG00000042429	Adora1	203.323	3.63513	0.801152	4.53738	5.69585e-06	0.000163647
ENSMUSG00000027849	Syt6	244.32	3.62324	0.979487	3.69912	0.000216345	0.00352567
ENSMUSG00000081723	Pira6	17.8753	3.61681	0.852054	4.24482	2.18773e-05	0.000515941
ENSMUSG00000021965	Ska3	199.602	3.61079	0.984217	3.66869	0.000243797	0.003854
ENSMUSG00000040204	Pclaf	372.671	3.57905	0.943421	3.79369	0.000148423	0.00257165
ENSMUSG00000049932	H2afx	1457.55	3.54487	0.557706	6.35616	2.06863e-10	2.26616e-08
ENSMUSG00000028874	Fgr	332.017	3.53613	0.586416	6.03008	1.63881e-09	1.41254e-07
ENSMUSG00000038943	Prc1	745.704	3.53162	0.70497	5.00961	5.45402e-07	2.18934e-05
ENSMUSG00000059323	Tonsl	109.345	3.52158	0.867715	4.05845	4.9399e-05	0.00104069
ENSMUSG00000038252	Ncapd2	988.789	3.51926	0.640009	5.49878	3.82436e-08	2.1574e-06
ENSMUSG00000097532	NA	49.3405	3.49615	1.02043	3.42615	0.000612206	0.0081213
ENSMUSG00000036768	Kif15	804.939	3.47714	0.703849	4.94018	7.80512e-07	2.98493e-05
ENSMUSG00000022094	Slc39a14	5614.63	3.46597	0.252149	13.7457	5.40543e-43	4.58921e-39
ENSMUSG00000023015	Racgap1	745.736	3.44941	0.728013	4.73812	2.15707e-06	7.16772e-05
ENSMUSG00000001227	Sema6b	248.333	3.44556	0.76618	4.49707	6.88974e-06	0.000193688
ENSMUSG00000070639	Lrrc8b	307.052	3.43819	0.558755	6.1533	7.5889e-10	7.2393e-08
ENSMUSG00000015568	Lpl	3412.78	3.43529	0.578708	5.93614	2.91805e-09	2.33719e-07
ENSMUSG00000022218	Tgm1	97.6265	3.43193	0.54823	6.26002	3.84937e-10	3.94502e-08
ENSMUSG00000037280	Galnt6	250.303	3.43106	0.974844	3.5196	0.000432192	0.00607
ENSMUSG00000034459	Ifit1	161.571	3.42134	1.01031	3.38641	0.000708128	0.00914374
ENSMUSG00000042066	Tmcc2	64.4668	3.40827	0.946673	3.60026	0.000317902	0.00476581
ENSMUSG00000047798	Cd300lf	741.218	3.40145	0.671832	5.06294	4.12834e-07	1.73177e-05
ENSMUSG00000032220	Myo1e	2158.56	3.36503	0.358537	9.38544	6.26523e-21	4.43265e-18
ENSMUSG00000026068	Il18rap	503.639	3.34379	0.729027	4.58665	4.50406e-06	0.000133471
ENSMUSG00000095742	NA	18.254	3.33244	0.990822	3.36331	0.000770127	0.00975877
ENSMUSG00000102813	NA	54.7441	3.327	0.93627	3.55346	0.0003802	0.00553743
ENSMUSG00000059674	Cdh24	43.7595	3.30036	0.647838	5.09442	3.49806e-07	1.51911e-05
ENSMUSG00000031642	Sh3rf1	79.3593	3.29224	0.817021	4.02957	5.58795e-05	0.0011501
ENSMUSG00000037313	Tacc3	419.474	3.27546	0.602959	5.43231	5.56279e-08	3.02744e-06
ENSMUSG00000001517	Foxm1	1008.75	3.26225	0.750971	4.34404	1.39886e-05	0.000350333
ENSMUSG00000079017	Ifi27l2a	347.381	3.24358	0.540624	5.9997	1.97681e-09	1.65351e-07
ENSMUSG00000057191	AB124611	337.684	3.24325	0.507026	6.39662	1.58856e-10	1.77459e-08
ENSMUSG00000005410	Mcm5	283.195	3.24191	0.916521	3.53719	0.000404406	0.00578021
ENSMUSG00000028698	Pik3r3	90.1363	3.241	0.555451	5.83489	5.38272e-09	3.97385e-07
ENSMUSG00000051517	Arhgef39	185.195	3.23933	0.834482	3.88184	0.00010367	0.00192174
ENSMUSG00000026463	Atp2b4	29.8728	3.22573	0.96033	3.35898	0.00078231	0.00986896
ENSMUSG00000004891	Nes	486.254	3.18811	0.641016	4.97353	6.57456e-07	2.5782e-05
ENSMUSG00000104316	NA	154.254	3.16081	0.582978	5.42184	5.8988e-08	3.14295e-06
ENSMUSG00000026274	Pask	151.686	3.15434	0.914293	3.45003	0.000560528	0.00755978
ENSMUSG00000036067	Slc2a6	664.738	3.15395	0.529178	5.9601	2.5209e-09	2.05793e-07
ENSMUSG00000105460	NA	57.9454	3.15052	0.878054	3.58807	0.000333135	0.00496195
ENSMUSG00000105987	AI506816	2601.26	3.14341	0.420913	7.46808	8.13712e-14	1.84224e-11
ENSMUSG00000053113	Socs3	1217.9	3.13784	0.473232	6.63066	3.34181e-11	4.57612e-09
ENSMUSG00000024590	Lmnb1	348.558	3.13569	0.354392	8.84806	8.90543e-19	4.58225e-16
ENSMUSG00000068129	Cst7	296.775	3.13499	0.623516	5.02792	4.95833e-07	2.02873e-05
ENSMUSG00000024675	Ms4a4c	71.8911	3.13403	0.862907	3.63195	0.000281291	0.00433423
ENSMUSG00000027115	Kif18a	379.327	3.12893	0.826411	3.78616	0.000152992	0.0026347
ENSMUSG00000036875	Dna2	895.948	3.12652	0.458927	6.81266	9.58075e-12	1.50631e-09
ENSMUSG00000079293	Clec7a	1504.82	3.11576	0.561791	5.54611	2.92093e-08	1.69275e-06
ENSMUSG00000039313	Minar1	40.0846	3.04996	0.822324	3.70896	0.000208114	0.0034273
ENSMUSG00000033356	Pus7l	170.572	3.04289	0.650976	4.67435	2.94879e-06	9.3123e-05
ENSMUSG00000057469	E2f6	277.074	3.03948	0.555265	5.47392	4.40191e-08	2.45064e-06
ENSMUSG00000024795	Kif20b	521.718	3.02559	0.595184	5.08345	3.70637e-07	1.58925e-05
ENSMUSG00000032482	Cspg5	23.4622	3.01635	0.889054	3.39277	0.0006919	0.00899727
ENSMUSG00000112980	D430020J02Rik	123.392	3.01426	0.776778	3.88046	0.000104257	0.00192632
ENSMUSG00000110631	NA	106.926	2.99965	0.792772	3.78375	0.000154481	0.00265764
ENSMUSG00000019359	Gdpd2	32.1004	2.99392	0.854884	3.50213	0.000461548	0.00641661
ENSMUSG00000023067	Cdkn1a	666.989	2.96613	0.737077	4.02419	5.71726e-05	0.00117245
ENSMUSG00000000982	Ccl3	1722.41	2.95915	0.556416	5.31823	1.04781e-07	5.20229e-06
ENSMUSG00000025758	Plk4	395.621	2.94911	0.658448	4.47888	7.50359e-06	0.000206836
ENSMUSG00000029096	Htra3	805.745	2.89544	0.479706	6.03586	1.5812e-09	1.37686e-07
ENSMUSG00000006398	Cdc20	355.76	2.88221	0.853967	3.37508	0.000737937	0.0094496
ENSMUSG00000074896	Ifit3	136.826	2.87882	0.661944	4.34904	1.36736e-05	0.000343457
ENSMUSG00000041079	Rwdd2b	106.56	2.87446	0.709457	4.05164	5.08602e-05	0.00106618
ENSMUSG00000053175	Bcl3	380.781	2.86953	0.402439	7.13034	1.00124e-12	1.82807e-10
ENSMUSG00000020841	Cpd	9409.64	2.8571	0.267952	10.6627	1.52057e-26	1.84423e-23
ENSMUSG00000034329	Brip1	330.448	2.84935	0.813792	3.50132	0.000462958	0.00642765
ENSMUSG00000038550	Ciart	57.4576	2.84897	0.631279	4.51302	6.39117e-06	0.00018193
ENSMUSG00000033350	Chst2	327.389	2.8373	0.569702	4.98032	6.34804e-07	2.51258e-05
ENSMUSG00000028270	Gbp2	265.731	2.82	0.824479	3.42035	0.000625409	0.00826847
ENSMUSG00000051235	Gen1	317.07	2.81965	0.750176	3.75865	0.000170834	0.00289787
ENSMUSG00000023940	Sgo1	348.122	2.81777	0.831208	3.38997	0.000699006	0.00904659
ENSMUSG00000023345	Poc1a	79.971	2.81387	0.811179	3.46887	0.00052266	0.00713979
ENSMUSG00000011179	Odc1	152.334	2.80891	0.57361	4.89691	9.7357e-07	3.54747e-05
ENSMUSG00000039899	Fgl2	635.745	2.79295	0.361036	7.73592	1.02659e-14	2.7669e-12
ENSMUSG00000028871	Rspo1	90.2784	2.79007	0.821453	3.3965	0.000682532	0.00890122
ENSMUSG00000117964	NA	231.373	2.77106	0.6462	4.28823	1.80101e-05	0.000433775
ENSMUSG00000025492	Ifitm3	781.612	2.75157	0.680515	4.04337	5.26882e-05	0.00109907
ENSMUSG00000030091	Nup210	1019.68	2.73419	0.467542	5.848	4.97516e-09	3.70519e-07
ENSMUSG00000030162	Olr1	418.54	2.73072	0.761829	3.58443	0.000337819	0.00501851
ENSMUSG00000037572	Wdhd1	477.225	2.71601	0.702514	3.86613	0.000110574	0.0020167
ENSMUSG00000079685	Ulbp1	406.034	2.70796	0.709252	3.81805	0.000134512	0.00238166
ENSMUSG00000056718	NA	21.4475	2.69462	0.775124	3.47637	0.000508248	0.00695973
ENSMUSG00000015340	Cybb	680.683	2.67233	0.481565	5.54925	2.86898e-08	1.66833e-06
ENSMUSG00000034349	Smc4	1452.49	2.67014	0.536848	4.97373	6.56766e-07	2.5782e-05
ENSMUSG00000024660	Incenp	893.684	2.64253	0.529689	4.98884	6.0743e-07	2.41156e-05
ENSMUSG00000072694	1500011B03Rik	140.332	2.63787	0.57103	4.6195	3.84669e-06	0.000116429
ENSMUSG00000071068	Treml2	748.651	2.63344	0.411461	6.40022	1.55152e-10	1.74469e-08
ENSMUSG00000071537	Klrg2	431.538	2.63173	0.662603	3.97181	7.13293e-05	0.00141492
ENSMUSG00000059248	Sept9	213.495	2.62741	0.777494	3.37933	0.00072662	0.00933283
ENSMUSG00000025153	Fasn	1192.13	2.62349	0.446844	5.87115	4.32784e-09	3.25163e-07
ENSMUSG00000074813	NA	462.956	2.61913	0.516194	5.07393	3.89693e-07	1.65939e-05
ENSMUSG00000037370	Enpp1	883.323	2.59387	0.471575	5.50043	3.78862e-08	2.15153e-06
ENSMUSG00000037020	Wdr62	396.356	2.5813	0.444199	5.81113	6.20515e-09	4.46455e-07
ENSMUSG00000088595	NA	59.6373	2.56838	0.592434	4.3353	1.45558e-05	0.000361343
ENSMUSG00000028702	Rad54l	273.837	2.56767	0.745154	3.44582	0.000569324	0.00766016
ENSMUSG00000031246	Sh3bgrl	198.005	2.56291	0.34635	7.39977	1.3642e-13	2.93216e-11
ENSMUSG00000030254	Rad18	287.936	2.53228	0.544723	4.64874	3.33964e-06	0.000102917
ENSMUSG00000015305	Sash1	107.589	2.51901	0.637415	3.95191	7.75294e-05	0.00151265
ENSMUSG00000026728	Vim	487.806	2.51354	0.396608	6.3376	2.33375e-10	2.52402e-08
ENSMUSG00000029410	Ppef2	68.2173	2.50442	0.737415	3.39621	0.000683252	0.00890377
ENSMUSG00000017550	Atad5	729.854	2.48441	0.565482	4.39344	1.11573e-05	0.000291014
ENSMUSG00000022150	Dab2	2106.18	2.47624	0.2869	8.63102	6.08072e-18	2.71712e-15
ENSMUSG00000025059	Gk	240.833	2.45691	0.503381	4.88083	1.05643e-06	3.79241e-05
ENSMUSG00000097472	NA	65.7291	2.44809	0.686119	3.56803	0.000359679	0.0052806
ENSMUSG00000022070	Bora	321.821	2.44692	0.678816	3.60468	0.000312532	0.00470461
ENSMUSG00000000682	Cd52	2377.7	2.43453	0.395642	6.15337	7.58539e-10	7.2393e-08
ENSMUSG00000052776	Oas1a	95.7122	2.42774	0.550385	4.411	1.02897e-05	0.000271724
ENSMUSG00000049999	Ppp1r3d	267.441	2.41897	0.53865	4.49081	7.09542e-06	0.000198158
ENSMUSG00000054342	Kcnn4	72.1473	2.40955	0.479384	5.02635	4.99897e-07	2.04044e-05
ENSMUSG00000042606	Hirip3	488.669	2.40113	0.370286	6.48452	8.90135e-11	1.07195e-08
ENSMUSG00000021886	Gpr65	848.669	2.39984	0.359133	6.6823	2.35219e-11	3.30085e-09
ENSMUSG00000002249	Tead3	140.241	2.38381	0.67085	3.55342	0.00038025	0.00553743
ENSMUSG00000028312	Smc2	1182.6	2.3597	0.513747	4.59311	4.36679e-06	0.000130313
ENSMUSG00000079419	Ms4a6c	303.488	2.34705	0.619573	3.78817	0.00015176	0.00261891
ENSMUSG00000029413	Naaa	1743.6	2.31899	0.156198	14.8465	7.33242e-50	1.24505e-45
ENSMUSG00000058470	Gm8369	155.062	2.31464	0.577861	4.00553	6.18789e-05	0.00125233
ENSMUSG00000002602	Axl	2008.27	2.29871	0.295356	7.78283	7.09223e-15	1.9742e-12
ENSMUSG00000025001	Hells	372.869	2.2905	0.477137	4.80052	1.58255e-06	5.49523e-05
ENSMUSG00000043541	Casc1	92.2085	2.28942	0.625934	3.65761	0.00025458	0.00397313
ENSMUSG00000057315	Arhgap24	1094.55	2.28635	0.341835	6.68845	2.25543e-11	3.21826e-09
ENSMUSG00000064349	NA	57.4516	2.28149	0.498691	4.57496	4.7631e-06	0.000140169
ENSMUSG00000077506	NA	58.8016	2.27192	0.492392	4.61405	3.94899e-06	0.000119101
ENSMUSG00000005667	Mthfd2	276.714	2.27032	0.539645	4.20705	2.5872e-05	0.000595267
ENSMUSG00000063450	Syne2	400.488	2.26425	0.560455	4.04001	5.34479e-05	0.00110947
ENSMUSG00000021007	Spata7	116.757	2.25085	0.442959	5.0814	3.74673e-07	1.60251e-05
ENSMUSG00000026355	Mcm6	617.61	2.23372	0.425214	5.25317	1.49505e-07	7.15096e-06
ENSMUSG00000031838	Ifi30	4148.51	2.22396	0.283729	7.83834	4.56542e-15	1.36001e-12
ENSMUSG00000030536	Iqgap1	1090.34	2.21287	0.367565	6.02033	1.74059e-09	1.49269e-07
ENSMUSG00000039942	Ptger4	512.335	2.21086	0.180762	12.2307	2.12985e-34	6.02749e-31
ENSMUSG00000022272	Myo10	91.434	2.19942	0.605894	3.63004	0.000283373	0.00435052
ENSMUSG00000006442	Srm	597.237	2.19711	0.600131	3.66105	0.000251182	0.0039382
ENSMUSG00000028896	Rcc1	376.618	2.18829	0.332414	6.58301	4.61004e-11	5.93019e-09
ENSMUSG00000036006	Ripor2	1274	2.17312	0.472776	4.59651	4.29628e-06	0.000128661
ENSMUSG00000113041	NA	95.384	2.17241	0.633399	3.42977	0.000604086	0.00803428
ENSMUSG00000054843	Atrnl1	491.421	2.16937	0.330901	6.55594	5.52941e-11	7.00667e-09
ENSMUSG00000024732	Ccdc86	609.887	2.15405	0.431786	4.9887	6.0786e-07	2.41156e-05
ENSMUSG00000027221	Chst1	727.128	2.14405	0.365949	5.85889	4.65969e-09	3.48553e-07
ENSMUSG00000022442	Ttll1	148.474	2.1402	0.525498	4.07271	4.64691e-05	0.000990019
ENSMUSG00000039126	Prune2	4789.44	2.12461	0.245403	8.65763	4.81673e-18	2.21049e-15
ENSMUSG00000098108	NA	93.5731	2.1239	0.450472	4.71484	2.41898e-06	7.89889e-05
ENSMUSG00000025743	Sdc3	2865.36	2.11443	0.367356	5.75581	8.62269e-09	5.90376e-07
ENSMUSG00000020658	Efr3b	50.8998	2.10749	0.597254	3.52863	0.000417717	0.00591563
ENSMUSG00000037278	Tmem97	134.298	2.08743	0.495685	4.2112	2.54018e-05	0.000586833
ENSMUSG00000099757	NA	603.893	2.086	0.523731	3.98296	6.80633e-05	0.00136127
ENSMUSG00000038679	Trps1	450.515	2.07542	0.566949	3.66068	0.000251543	0.00394022
ENSMUSG00000065922	NA	148.218	2.07517	0.37367	5.55348	2.80045e-08	1.63971e-06
ENSMUSG00000024640	Psat1	1491.01	2.07452	0.452109	4.58854	4.46349e-06	0.0001325
ENSMUSG00000015467	Egfl8	53.8182	2.07188	0.598209	3.46347	0.00053326	0.00723801
ENSMUSG00000025289	Prdx4	620.22	2.06095	0.358341	5.75136	8.85299e-09	6.0371e-07
ENSMUSG00000041736	Tspo	524.435	2.05591	0.347625	5.91415	3.33603e-09	2.58657e-07
ENSMUSG00000035493	Tgfbi	2193.44	2.0525	0.454441	4.51654	6.28597e-06	0.000179388
ENSMUSG00000025854	Fam20c	165.347	2.04665	0.48687	4.20369	2.62593e-05	0.000602544
ENSMUSG00000097971	NA	122325	2.0409	0.371122	5.49928	3.81354e-08	2.1574e-06
ENSMUSG00000056394	Lig1	556.596	2.03738	0.565841	3.60062	0.000317454	0.00476581
ENSMUSG00000022893	Adamts1	909.785	2.03433	0.602865	3.37443	0.000739684	0.00946484
ENSMUSG00000000244	Tspan32	464.074	2.0293	0.302566	6.70696	1.98721e-11	2.90886e-09
ENSMUSG00000056145	AI504432	863.173	2.02275	0.532586	3.79797	0.000145885	0.00254326
ENSMUSG00000018171	Vmp1	2666.57	2.02206	0.263648	7.66954	1.72612e-14	4.31022e-12
ENSMUSG00000054404	Slfn5	622.89	2.02077	0.54147	3.73201	0.000189956	0.00317154
ENSMUSG00000036825	Ssx2ip	272.794	2.01274	0.489429	4.11242	3.91538e-05	0.000857846
ENSMUSG00000036334	Igsf10	368.093	2.00201	0.348677	5.74174	9.37097e-09	6.31425e-07
ENSMUSG00000073489	Ifi204	725.045	1.99538	0.50494	3.95172	7.75926e-05	0.00151265
ENSMUSG00000020547	Bzw2	262.999	1.99527	0.449757	4.43634	9.15033e-06	0.000243531
ENSMUSG00000030978	Rrm1	1335.56	1.99454	0.449311	4.43911	9.03311e-06	0.000240788
ENSMUSG00000036181	Hist1h1c	581.065	1.98795	0.562953	3.53129	0.000413538	0.00587354
ENSMUSG00000015027	Galns	398.723	1.9813	0.426111	4.64973	3.32378e-06	0.000102717
ENSMUSG00000028333	Anp32b	1497.48	1.96294	0.32255	6.0857	1.15987e-09	1.04758e-07
ENSMUSG00000081043	NA	29.8027	1.94986	0.487368	4.0008	6.31275e-05	0.00127456
ENSMUSG00000037242	Clic4	864.413	1.94855	0.499379	3.90196	9.54188e-05	0.00179824
ENSMUSG00000099974	Bcl2a1d	41.8728	1.94415	0.512468	3.79371	0.000148416	0.00257165
ENSMUSG00000001542	Ell2	1735.69	1.94293	0.30513	6.36755	1.92069e-10	2.13159e-08
ENSMUSG00000022360	Atad2	2243.05	1.93838	0.405649	4.77847	1.76633e-06	6.04682e-05
ENSMUSG00000026271	Gpr35	2171.49	1.92206	0.360264	5.33514	9.54713e-08	4.81039e-06
ENSMUSG00000115222	NA	423.118	1.91904	0.344442	5.57145	2.52628e-08	1.50513e-06
ENSMUSG00000117869	Snhg4	733.788	1.90711	0.564948	3.37573	0.00073621	0.00944173
ENSMUSG00000027076	Timm10	96.8881	1.90199	0.40784	4.66358	3.10754e-06	9.68185e-05
ENSMUSG00000025403	Shmt2	1219.16	1.90181	0.342413	5.55415	2.78963e-08	1.63903e-06
ENSMUSG00000051627	Hist1h1e	978.793	1.89638	0.530062	3.57765	0.000346692	0.00512789
ENSMUSG00000022528	Hes1	40.7751	1.89432	0.485813	3.89927	9.64827e-05	0.00181627
ENSMUSG00000083863	NA	119.622	1.88357	0.452394	4.16357	3.13313e-05	0.000706515
ENSMUSG00000030588	Yif1b	327.742	1.88165	0.441328	4.26362	2.01144e-05	0.000479695
ENSMUSG00000027315	Spint1	5037.27	1.87983	0.204498	9.19241	3.84141e-20	2.41582e-17
ENSMUSG00000031799	Tpm4	1472.27	1.85472	0.23228	7.98485	1.40694e-15	4.68429e-13
ENSMUSG00000044934	Zfp367	355.47	1.85364	0.352112	5.26434	1.40696e-07	6.74863e-06
ENSMUSG00000062997	Rpl35	90.7559	1.84855	0.320228	5.7726	7.80568e-09	5.38783e-07
ENSMUSG00000031562	Dctd	225.153	1.84802	0.409613	4.51163	6.43313e-06	0.00018264
ENSMUSG00000044533	Rps2	540.181	1.83789	0.38512	4.77224	1.82184e-06	6.19046e-05
ENSMUSG00000057561	Eif1a	1145.5	1.83261	0.283339	6.46792	9.93606e-11	1.17163e-08
ENSMUSG00000031832	Taf1c	155.034	1.81722	0.300746	6.04236	1.51876e-09	1.34315e-07
ENSMUSG00000000386	Mx1	321.907	1.81515	0.45602	3.98043	6.8791e-05	0.00136937
ENSMUSG00000042099	Kank3	134.624	1.81065	0.426092	4.24945	2.14297e-05	0.000506791
ENSMUSG00000112875	NA	137.347	1.81014	0.305433	5.92647	3.0951e-09	2.45584e-07
ENSMUSG00000009575	Cbx5	2916.76	1.80619	0.267919	6.74154	1.56712e-11	2.37587e-09
ENSMUSG00000025351	Cd63	1913.47	1.79033	0.251678	7.11356	1.13087e-12	2.04278e-10
ENSMUSG00000091337	Eid1	1205.66	1.78781	0.267201	6.69088	2.21833e-11	3.19214e-09
ENSMUSG00000041313	Slc7a1	1795.58	1.78119	0.413672	4.3058	1.66384e-05	0.000406175
ENSMUSG00000074151	Nlrc5	506.122	1.77939	0.363308	4.89775	9.69386e-07	3.53982e-05
ENSMUSG00000014599	Csf1	1524.06	1.77433	0.319408	5.55506	2.77516e-08	1.63619e-06
ENSMUSG00000019082	Slc25a22	459.53	1.77325	0.48683	3.64244	0.000270066	0.0041917
ENSMUSG00000063234	Gpr84	3896.75	1.76286	0.37734	4.6718	2.98576e-06	9.40599e-05
ENSMUSG00000023259	Slc26a6	187.041	1.76208	0.470936	3.74166	0.000182812	0.00307038
ENSMUSG00000016528	Mapkapk2	1609.89	1.76053	0.30372	5.79656	6.76888e-09	4.78898e-07
ENSMUSG00000023953	Polh	400.982	1.75681	0.368318	4.76982	1.84394e-06	6.23706e-05
ENSMUSG00000030789	Itgax	454.043	1.75026	0.479749	3.64829	0.000263989	0.00410488
ENSMUSG00000025498	Irf7	340.932	1.74967	0.442303	3.95582	7.62738e-05	0.00149642
ENSMUSG00000042354	Gnl3	1122.98	1.74559	0.44838	3.89311	9.89686e-05	0.00185484
ENSMUSG00000064341	ND1	25451.1	1.73994	0.255563	6.80824	9.88029e-12	1.53915e-09
ENSMUSG00000027405	Nop56	1033.99	1.73749	0.352463	4.92957	8.24089e-07	3.10267e-05
ENSMUSG00000026628	Atf3	238.155	1.72654	0.342784	5.03682	4.73327e-07	1.94603e-05
ENSMUSG00000023805	Synj2	788.235	1.72277	0.393928	4.37332	1.22372e-05	0.000314829
ENSMUSG00000046718	Bst2	396.81	1.71253	0.382292	4.47963	7.47728e-06	0.000206484
ENSMUSG00000018920	Cxcl16	1607.68	1.71	0.356835	4.79214	1.65008e-06	5.69479e-05
ENSMUSG00000032381	Ciao2a	937.01	1.69622	0.389128	4.35904	1.30631e-05	0.00033057
ENSMUSG00000030206	Gsg1	79.7877	1.69605	0.398911	4.25169	2.12164e-05	0.000503852
ENSMUSG00000069793	Slfn9	215.135	1.69266	0.483924	3.49778	0.000469148	0.00650828
ENSMUSG00000024736	Tmem132a	1265.41	1.68719	0.418126	4.03512	5.45737e-05	0.00112595
ENSMUSG00000015176	Nolc1	659.265	1.6755	0.402816	4.15946	3.19005e-05	0.000718395
ENSMUSG00000000740	Rpl13	372.562	1.66588	0.474597	3.5101	0.000447944	0.00624987
ENSMUSG00000021360	Gcnt2	2411.41	1.6602	0.321671	5.16115	2.45432e-07	1.09959e-05
ENSMUSG00000073902	NA	1679.92	1.65883	0.351063	4.72515	2.29946e-06	7.53761e-05
ENSMUSG00000022537	Tmem44	935.633	1.64175	0.359666	4.56466	5.00303e-06	0.000146468
ENSMUSG00000061482	Hist1h4d	1110.08	1.63998	0.406038	4.03897	5.36862e-05	0.00111305
ENSMUSG00000003970	Rpl8	2521.83	1.63914	0.267563	6.12617	9.00193e-10	8.30721e-08
ENSMUSG00000040528	Milr1	2027.89	1.63901	0.235606	6.95657	3.48646e-12	6.1031e-10
ENSMUSG00000053684	BC048403	328.727	1.63507	0.419545	3.89725	9.72926e-05	0.00182747
ENSMUSG00000029687	Ezh2	894.054	1.6332	0.444914	3.67081	0.000241782	0.00384292
ENSMUSG00000022614	Lmf2	1924.77	1.62328	0.406476	3.99353	6.50962e-05	0.00130809
ENSMUSG00000029521	Chek2	242.628	1.62014	0.361344	4.48366	7.33748e-06	0.000203579
ENSMUSG00000028416	Bag1	1167.67	1.61515	0.415373	3.88842	0.000100898	0.00187857
ENSMUSG00000032014	Oaf	305.916	1.60301	0.446149	3.59298	0.000326913	0.00488577
ENSMUSG00000002984	Tomm40	635.613	1.60247	0.456496	3.51037	0.000447482	0.00624856
ENSMUSG00000046245	Pilra	1421.09	1.59981	0.389135	4.11119	3.93629e-05	0.000860208
ENSMUSG00000022351	Sqle	320.59	1.59246	0.396324	4.01807	5.8677e-05	0.00119547
ENSMUSG00000093674	Rpl41	1316.11	1.5922	0.261526	6.08809	1.14263e-09	1.03753e-07
ENSMUSG00000049130	C5ar1	8667.38	1.59106	0.298392	5.33213	9.70674e-08	4.86196e-06
ENSMUSG00000068923	Syt11	859.849	1.5897	0.352527	4.50943	6.50011e-06	0.000183953
ENSMUSG00000007029	Vars	1070.88	1.57282	0.303918	5.17514	2.27735e-07	1.03118e-05
ENSMUSG00000026192	Atic	1773.96	1.56876	0.301558	5.20219	1.96954e-07	9.01424e-06
ENSMUSG00000036285	Noa1	552.128	1.56499	0.343381	4.55759	5.17451e-06	0.000150451
ENSMUSG00000084416	NA	267.353	1.56022	0.327063	4.77041	1.83855e-06	6.23125e-05
ENSMUSG00000026958	Dpp7	271.755	1.55654	0.415229	3.74863	0.000177803	0.00300109
ENSMUSG00000053007	Creb5	319.789	1.55621	0.331401	4.69585	2.65498e-06	8.53816e-05
ENSMUSG00000033669	Zfp7	200.243	1.55307	0.442402	3.51055	0.000447184	0.00624856
ENSMUSG00000039683	Sdk1	697.669	1.55081	0.287604	5.39215	6.96212e-08	3.64867e-06
ENSMUSG00000006731	B4galnt1	1814.05	1.54554	0.381839	4.04761	5.17425e-05	0.00108201
ENSMUSG00000105748	NA	206.718	1.53838	0.343986	4.47221	7.74154e-06	0.000210659
ENSMUSG00000065979	Cpped1	468.759	1.52994	0.341648	4.47811	7.53079e-06	0.000206914
ENSMUSG00000041859	Mcm3	1073.92	1.52239	0.350499	4.3435	1.40232e-05	0.000350683
ENSMUSG00000021486	Prelid1	756.093	1.52077	0.234663	6.48065	9.13267e-11	1.08784e-08
ENSMUSG00000056201	Cfl1	5025.57	1.52075	0.251205	6.05385	1.41428e-09	1.2573e-07
ENSMUSG00000033220	Rac2	2954.75	1.51721	0.187556	8.08938	5.99711e-16	2.21372e-13
ENSMUSG00000096199	Ptrhd1	305.292	1.51623	0.36822	4.11772	3.82645e-05	0.000841621
ENSMUSG00000105864	NA	406.401	1.51114	0.386647	3.90833	9.29356e-05	0.0017619
ENSMUSG00000098222	NA	125.907	1.51068	0.322977	4.67736	2.90586e-06	9.25193e-05
ENSMUSG00000024942	Capn1	302.465	1.50755	0.28618	5.26784	1.38035e-07	6.63977e-06
ENSMUSG00000019814	Ltv1	568.514	1.50585	0.438223	3.43627	0.000589776	0.00787295
ENSMUSG00000030835	Nomo1	1229.03	1.50343	0.375014	4.00899	6.09796e-05	0.00123708
ENSMUSG00000031432	Prps1	147.649	1.49959	0.390118	3.84393	0.000121078	0.00217097
ENSMUSG00000040212	Emp3	1322.07	1.49533	0.384927	3.88471	0.000102452	0.00190125
ENSMUSG00000005732	Ranbp1	354.611	1.49522	0.230419	6.48913	8.63339e-11	1.04711e-08
ENSMUSG00000057841	Rpl32	1765.94	1.49519	0.422192	3.54148	0.000397886	0.00572949
ENSMUSG00000064339	NA	2.1935e+06	1.49205	0.264044	5.65078	1.59721e-08	1.01196e-06
ENSMUSG00000022962	Gart	904.026	1.48055	0.347224	4.26396	2.00833e-05	0.000479695
ENSMUSG00000021477	Ctsl	21416.6	1.47574	0.227732	6.48018	9.16145e-11	1.08784e-08
ENSMUSG00000033161	Atp1a1	8748.52	1.47095	0.109606	13.4204	4.59213e-41	2.59915e-37
ENSMUSG00000022508	Bcl6	1979.43	1.46514	0.287263	5.10034	3.39038e-07	1.47612e-05
ENSMUSG00000020077	Srgn	4057.09	1.45994	0.334066	4.37022	1.2412e-05	0.00031763
ENSMUSG00000052310	Slc39a1	769.414	1.45859	0.276217	5.28061	1.28757e-07	6.28244e-06
ENSMUSG00000026547	Tagln2	1904.32	1.45164	0.310205	4.67961	2.87418e-06	9.1736e-05
ENSMUSG00000024679	Ms4a6d	2245.38	1.44689	0.234414	6.17239	6.72642e-10	6.48947e-08
ENSMUSG00000108414	Snhg1	843.932	1.44389	0.373691	3.86387	0.000111607	0.00203335
ENSMUSG00000029404	Arl6ip4	337.744	1.43949	0.279898	5.1429	2.70525e-07	1.19935e-05
ENSMUSG00000001305	Rrp15	189.872	1.43282	0.370561	3.86663	0.000110348	0.00201474
ENSMUSG00000012848	Rps5	3340.5	1.428	0.292161	4.88773	1.02005e-06	3.69306e-05
ENSMUSG00000069516	Lyz2	3597.22	1.42229	0.401209	3.54501	0.000392594	0.00568308
ENSMUSG00000064340	NA	98.976	1.42161	0.372747	3.81386	0.000136812	0.00241232
ENSMUSG00000044345	Marveld1	85.6328	1.40977	0.401696	3.50955	0.000448868	0.00625248
ENSMUSG00000018042	Cyb5r3	1151.33	1.40701	0.297732	4.72575	2.29265e-06	7.52984e-05
ENSMUSG00000074578	Zfas1	689.29	1.397	0.285214	4.89807	9.6783e-07	3.53982e-05
ENSMUSG00000033720	Sfxn5	360.517	1.39678	0.378291	3.69236	0.000222185	0.00359893
ENSMUSG00000064337	NA	664411	1.38913	0.309103	4.49408	6.98727e-06	0.000195782
ENSMUSG00000032294	Pkm	2192.77	1.38706	0.203375	6.82023	9.08964e-12	1.45606e-09
ENSMUSG00000006678	Pola1	302.789	1.38281	0.391599	3.53118	0.000413707	0.00587354
ENSMUSG00000001525	Tubb5	9498.83	1.38216	0.283583	4.87392	1.09404e-06	3.9109e-05
ENSMUSG00000042770	Hebp1	906.131	1.38101	0.375479	3.678	0.000235067	0.00376906
ENSMUSG00000071714	Csf2rb2	3385.29	1.3808	0.272186	5.07298	3.91635e-07	1.66249e-05
ENSMUSG00000026656	Fcgr2b	8885.31	1.38057	0.254359	5.42767	5.70941e-08	3.08744e-06
ENSMUSG00000027995	Tlr2	4141.18	1.38003	0.290405	4.75208	2.01334e-06	6.72963e-05
ENSMUSG00000004788	Eif2b2	366.012	1.3758	0.309565	4.44431	8.81747e-06	0.00023578
ENSMUSG00000031328	Flna	4184.49	1.37246	0.213847	6.41796	1.3811e-10	1.5739e-08
ENSMUSG00000024844	Banf1	403.862	1.3697	0.358438	3.82131	0.000132743	0.0023528
ENSMUSG00000043740	B430306N03Rik	647.5	1.36558	0.362263	3.76958	0.000163522	0.00279336
ENSMUSG00000061477	Rps7	420.983	1.36496	0.317122	4.30423	1.67567e-05	0.000407051
ENSMUSG00000001642	Akr1b3	590.47	1.36318	0.403753	3.37628	0.000734729	0.00942985
ENSMUSG00000041355	Ssr2	1188.44	1.35907	0.269291	5.04684	4.49165e-07	1.85933e-05
ENSMUSG00000030748	Il4ra	6945.31	1.34479	0.312275	4.30644	1.65906e-05	0.000406175
ENSMUSG00000108820	NA	328.181	1.34358	0.312651	4.29736	1.72844e-05	0.000417809
ENSMUSG00000018446	C1qbp	960.986	1.3431	0.317572	4.22929	2.34434e-05	0.000548304
ENSMUSG00000033880	Lgals3bp	8642.13	1.34225	0.315776	4.25065	2.13151e-05	0.000505489
ENSMUSG00000020372	Rack1	4171.91	1.32828	0.158626	8.37367	5.58497e-17	2.25792e-14
ENSMUSG00000064351	COX1	56587.5	1.32816	0.25357	5.23783	1.62474e-07	7.57912e-06
ENSMUSG00000024360	Etf1	1496.02	1.32597	0.248599	5.33377	9.61955e-08	4.83254e-06
ENSMUSG00000024165	Jpt2	706.195	1.31337	0.337955	3.88621	0.00010182	0.00189158
ENSMUSG00000022391	Rangap1	892.634	1.31044	0.367239	3.56836	0.000359218	0.0052806
ENSMUSG00000064367	ND5	23143	1.30542	0.265693	4.91324	8.9583e-07	3.32849e-05
ENSMUSG00000056413	Adap1	454.259	1.29944	0.315887	4.11364	3.89474e-05	0.000854428
ENSMUSG00000064370	CYTB	43251.9	1.2965	0.233492	5.55263	2.81398e-08	1.64197e-06
ENSMUSG00000044894	Uqcrq	422.872	1.29072	0.364263	3.54336	0.00039506	0.0057089
ENSMUSG00000026864	Hspa5	16271.8	1.28919	0.241247	5.34386	9.09895e-08	4.62576e-06
ENSMUSG00000035376	Hacd2	1359.53	1.28705	0.341892	3.76451	0.000166879	0.00284214
ENSMUSG00000027712	Anxa5	453.674	1.28657	0.331697	3.87875	0.000104995	0.00193364
ENSMUSG00000027397	Slc20a1	719.227	1.285	0.328794	3.90824	9.2972e-05	0.0017619
ENSMUSG00000057666	Gapdh	1282.29	1.28179	0.334433	3.83272	0.000126734	0.00226521
ENSMUSG00000025161	Slc16a3	799.589	1.27702	0.290358	4.39807	1.09216e-05	0.000285307
ENSMUSG00000028081	Rps3a1	823.082	1.27366	0.272361	4.67638	2.91977e-06	9.26687e-05
ENSMUSG00000063229	Ldha	2184.29	1.2666	0.187356	6.76041	1.37602e-11	2.10494e-09
ENSMUSG00000109852	NA	328.601	1.26409	0.306888	4.11904	3.80451e-05	0.000838968
ENSMUSG00000021270	Hsp90aa1	523.232	1.25983	0.265079	4.75267	2.00751e-06	6.72336e-05
ENSMUSG00000028018	Gstcd	397.517	1.25267	0.350843	3.57044	0.000356376	0.00524828
ENSMUSG00000037885	Stk35	856.793	1.25246	0.332189	3.77032	0.000163036	0.00278786
ENSMUSG00000057322	Rpl38	252.269	1.25178	0.316294	3.95765	7.56899e-05	0.00148924
ENSMUSG00000022283	Pabpc1	10728.1	1.24835	0.165775	7.53038	5.05928e-14	1.1768e-11
ENSMUSG00000015016	Acsf3	163.064	1.24543	0.361521	3.44497	0.000571128	0.00767835
ENSMUSG00000028837	Psmb2	1018.46	1.23715	0.217572	5.68616	1.29926e-08	8.48516e-07
ENSMUSG00000025810	Nrp1	3506.83	1.23684	0.155991	7.92892	2.21055e-15	6.95096e-13
ENSMUSG00000060098	Prmt7	498.695	1.23197	0.281726	4.37292	1.22593e-05	0.000314922
ENSMUSG00000035704	Alg8	3752.68	1.23061	0.275114	4.47309	7.70964e-06	0.000210311
ENSMUSG00000000555	Itga5	1596.47	1.22723	0.282658	4.34174	1.41356e-05	0.000352652
ENSMUSG00000045917	Tmem268	2158.26	1.22347	0.315479	3.87814	0.000105257	0.00193637
ENSMUSG00000064363	ND4	17293.5	1.22078	0.223078	5.47244	4.43873e-08	2.46306e-06
ENSMUSG00000038059	Smim3	1418.04	1.22051	0.232715	5.24466	1.56567e-07	7.38475e-06
ENSMUSG00000026526	Fh1	378.583	1.21434	0.345728	3.5124	0.000444079	0.00621125
ENSMUSG00000112148	Lilrb4a	779.799	1.21301	0.313152	3.87357	0.000107254	0.00196883
ENSMUSG00000003810	Mast2	1301.78	1.21141	0.175357	6.90826	4.90626e-12	8.24835e-10
ENSMUSG00000032382	Snx1	2153.54	1.20633	0.311554	3.87197	0.000107961	0.00197672
ENSMUSG00000031939	Taf1d	2833.73	1.20547	0.213376	5.64952	1.60901e-08	1.01565e-06
ENSMUSG00000037805	Rpl10a	1264.95	1.20011	0.220735	5.43687	5.42235e-08	2.9605e-06
ENSMUSG00000057406	Nsd2	3192.06	1.19941	0.233386	5.13915	2.75979e-07	1.22034e-05
ENSMUSG00000031657	Heatr3	676.519	1.1991	0.29679	4.04025	5.33948e-05	0.00110947
ENSMUSG00000038070	Cntln	352.992	1.18924	0.345888	3.43822	0.000585554	0.00782274
ENSMUSG00000032399	Rpl4	7278.55	1.1882	0.107673	11.0353	2.58115e-28	4.86977e-25
ENSMUSG00000057113	Npm1	1467.14	1.17617	0.232558	5.05755	4.24687e-07	1.77179e-05
ENSMUSG00000008690	Ncaph2	328.665	1.17596	0.341713	3.44137	0.000578781	0.00774915
ENSMUSG00000030189	Ybx3	750.299	1.17431	0.272326	4.31215	1.61672e-05	0.000397278
ENSMUSG00000072620	Slfn2	624.466	1.17393	0.319837	3.67041	0.000242163	0.00384292
ENSMUSG00000024579	Pcyox1l	521.929	1.16782	0.291076	4.01208	6.01868e-05	0.00122245
ENSMUSG00000031451	Gas6	2592.62	1.16595	0.341402	3.41518	0.000637389	0.00838982
ENSMUSG00000001089	Luzp1	1167.11	1.16182	0.218214	5.32423	1.01383e-07	5.06317e-06
ENSMUSG00000038047	Haus6	853.902	1.16027	0.319332	3.63342	0.000279684	0.00432124
ENSMUSG00000047675	Rps8	411.323	1.15858	0.332656	3.48283	0.000496146	0.00682704
ENSMUSG00000025534	Gusb	8669.14	1.15775	0.155906	7.4259	1.1202e-13	2.43858e-11
ENSMUSG00000022678	Nde1	528.327	1.14163	0.322209	3.54314	0.000395387	0.0057089
ENSMUSG00000021423	Ly86	27618.2	1.13856	0.197068	5.77751	7.58135e-09	5.29758e-07
ENSMUSG00000037936	Scarb1	1128.63	1.13851	0.204211	5.57514	2.47328e-08	1.48397e-06
ENSMUSG00000039713	Plekhg5	537.389	1.13798	0.306207	3.71639	0.000202093	0.00334784
ENSMUSG00000015804	Med28	1180.39	1.13692	0.174576	6.51247	7.39229e-11	9.09573e-09
ENSMUSG00000019370	Calm3	953.142	1.13124	0.333842	3.38853	0.000702674	0.00908713
ENSMUSG00000028772	Zcchc17	367.099	1.13081	0.246238	4.59236	4.38264e-06	0.000130556
ENSMUSG00000071713	Csf2rb	5822.65	1.12261	0.206979	5.42376	5.83597e-08	3.14295e-06
ENSMUSG00000020075	Ddx21	2176.56	1.11997	0.264337	4.23692	2.26602e-05	0.000532187
ENSMUSG00000027199	Gatm	5068.58	1.10839	0.209939	5.27958	1.29483e-07	6.29979e-06
ENSMUSG00000020267	Hint1	454.981	1.10793	0.231246	4.7911	1.65866e-06	5.70124e-05
ENSMUSG00000028843	Sh3bgrl3	6174.24	1.10325	0.297536	3.70796	0.000208933	0.00343434
ENSMUSG00000026234	Ncl	5861.13	1.09636	0.178938	6.12704	8.95281e-10	8.30704e-08
ENSMUSG00000015749	Anp32e	1697.2	1.09197	0.265652	4.11052	3.9477e-05	0.000860888
ENSMUSG00000034994	Eef2	11547.9	1.09007	0.189012	5.76721	8.05952e-09	5.54051e-07
ENSMUSG00000016256	Ctsz	8313.51	1.08771	0.282894	3.84495	0.000120577	0.00216656
ENSMUSG00000079197	Psme2	294.691	1.08533	0.299592	3.62268	0.000291567	0.00446019
ENSMUSG00000028096	Gpr89	528.862	1.0791	0.197944	5.45156	4.99304e-08	2.7349e-06
ENSMUSG00000020806	Rhbdf2	1152.71	1.0721	0.312593	3.42971	0.000604227	0.00803428
ENSMUSG00000026222	Sp100	999.558	1.07139	0.283285	3.78202	0.000155563	0.00267202
ENSMUSG00000019832	Rab32	2366.73	1.06072	0.210112	5.04834	4.45671e-07	1.85478e-05
ENSMUSG00000021504	B4galt7	513.423	1.06069	0.269824	3.93105	8.45752e-05	0.00162453
ENSMUSG00000024085	Man2a1	2302.02	1.06001	0.24644	4.30131	1.69794e-05	0.000411283
ENSMUSG00000025374	Nabp2	387.426	1.05699	0.262937	4.01994	5.82131e-05	0.00118805
ENSMUSG00000021957	Tkt	1520.56	1.05259	0.19446	5.41286	6.20255e-08	3.29123e-06
ENSMUSG00000079641	Rpl39	434.634	1.05129	0.270197	3.89085	9.98949e-05	0.00186601
ENSMUSG00000067274	Rplp0	1268	1.05066	0.188172	5.58352	2.35698e-08	1.42425e-06
ENSMUSG00000040952	Rps19	638.655	1.04554	0.223682	4.67423	2.95054e-06	9.3123e-05
ENSMUSG00000037563	Rps16	171.904	1.04259	0.20677	5.04227	4.60035e-07	1.89597e-05
ENSMUSG00000073616	Cops9	353.311	1.03591	0.264722	3.91319	9.10835e-05	0.00173385
ENSMUSG00000029467	Atp2a2	8777.32	1.03507	0.178486	5.79918	6.66402e-09	4.75441e-07
ENSMUSG00000029547	Ints1	1060.59	1.03491	0.231936	4.46203	8.11877e-06	0.000219867
ENSMUSG00000025130	P4hb	5985.45	1.03483	0.175736	5.88854	3.89612e-09	2.9534e-07
ENSMUSG00000032601	Prkar2a	1065.3	1.03312	0.28718	3.59748	0.000321321	0.00481131
ENSMUSG00000071644	Eef1g	667.788	1.03201	0.21804	4.73313	2.21082e-06	7.33116e-05
ENSMUSG00000034708	Grn	49776.1	1.0243	0.204247	5.01502	5.30289e-07	2.13372e-05
ENSMUSG00000027342	Pcna	669.617	1.02248	0.270422	3.78103	0.000156181	0.00267873
ENSMUSG00000070476	Fam217b	2488.27	1.02124	0.280136	3.64551	0.000266858	0.0041457
ENSMUSG00000013698	Pea15a	3339.64	1.01739	0.264421	3.84762	0.000119272	0.00214994
ENSMUSG00000028798	Eif3i	1122.46	1.01545	0.294006	3.45386	0.000552625	0.00746505
ENSMUSG00000066150	Slc31a1	2063.9	1.01533	0.200299	5.06906	3.99777e-07	1.68861e-05
ENSMUSG00000031805	Jak3	2032.32	1.01443	0.273192	3.71323	0.000204628	0.00338653
ENSMUSG00000034593	Myo5a	2485.94	0.999288	0.230379	4.33758	1.44063e-05	0.000358153
ENSMUSG00000025393	Atp5b	9810.2	0.996144	0.188903	5.27331	1.33988e-07	6.46341e-06
ENSMUSG00000008668	Rps18	629.688	0.98719	0.244519	4.03728	5.40752e-05	0.00111975
ENSMUSG00000030560	Ctsc	14180.5	0.985217	0.169144	5.82473	5.72059e-09	4.16891e-07
ENSMUSG00000025647	Shisa5	7967.65	0.982963	0.233545	4.20889	2.56633e-05	0.000591471
ENSMUSG00000030471	Zdhhc13	1106.5	0.981132	0.26715	3.67259	0.000240104	0.00382095
ENSMUSG00000030786	Itgam	44308.4	0.97567	0.269385	3.62184	0.000292519	0.00446879
ENSMUSG00000004043	Stat5a	394.249	0.973889	0.279204	3.48809	0.00048648	0.00672674
ENSMUSG00000027642	Rpn2	5645.81	0.973808	0.147303	6.6109	3.81986e-11	5.02801e-09
ENSMUSG00000027067	Ssrp1	1052.87	0.970068	0.228748	4.24078	2.22748e-05	0.000524586
ENSMUSG00000039637	Coro7	2315.77	0.967586	0.208351	4.64401	3.41706e-06	0.000105112
ENSMUSG00000028757	Ddost	2118.21	0.966234	0.198634	4.86439	1.14813e-06	4.06999e-05
ENSMUSG00000016252	Atp5e	553.032	0.964493	0.257654	3.74337	0.000181571	0.00305255
ENSMUSG00000025362	Rps26	810.559	0.961652	0.234117	4.10757	3.99844e-05	0.000868204
ENSMUSG00000027775	Mfsd1	3659.3	0.961113	0.162287	5.9223	3.17461e-09	2.49559e-07
ENSMUSG00000020929	Eftud2	1000.43	0.957011	0.207907	4.60307	4.16316e-06	0.000124895
ENSMUSG00000024661	Fth1	18817.2	0.951834	0.250213	3.80409	0.000142327	0.00249145
ENSMUSG00000038900	Rpl12	519.553	0.947224	0.248157	3.81704	0.000135063	0.00238396
ENSMUSG00000030256	Bhlhe41	9782.89	0.94151	0.164382	5.72758	1.01873e-08	6.78357e-07
ENSMUSG00000055013	Agap1	719.653	0.937062	0.24677	3.79731	0.000146275	0.00254743
ENSMUSG00000027540	Ptpn1	5261.48	0.93648	0.169638	5.52047	3.38094e-08	1.93294e-06
ENSMUSG00000029174	Tbc1d1	948.684	0.931383	0.252235	3.69253	0.000222037	0.00359893
ENSMUSG00000032349	Elovl5	1326.7	0.930821	0.263361	3.5344	0.000408703	0.00581221
ENSMUSG00000038963	Slco4a1	2795.09	0.930776	0.189184	4.91994	8.65702e-07	3.25213e-05
ENSMUSG00000021458	Aopep	728.457	0.928953	0.149705	6.20523	5.46171e-10	5.39185e-08
ENSMUSG00000056220	Pla2g4a	3308.13	0.919303	0.260649	3.52698	0.000420333	0.00594277
ENSMUSG00000054808	Actn4	1613.2	0.917529	0.200806	4.56923	4.89511e-06	0.000143804
ENSMUSG00000023004	Tuba1b	1334.69	0.916363	0.22134	4.14007	3.47201e-05	0.000778793
ENSMUSG00000028639	Ybx1	2506.82	0.916188	0.237714	3.85417	0.000116125	0.00210214
ENSMUSG00000001175	Calm1	7921.82	0.898564	0.168921	5.31943	1.04092e-07	5.18322e-06
ENSMUSG00000039911	Spsb1	2488.11	0.897998	0.174336	5.15095	2.5917e-07	1.15504e-05
ENSMUSG00000045983	Eif4g1	4781.45	0.895656	0.168719	5.30858	1.10481e-07	5.42189e-06
ENSMUSG00000019528	Gyg	510.938	0.89535	0.222531	4.02349	5.73432e-05	0.00117453
ENSMUSG00000000594	Gm2a	5533.19	0.894038	0.165308	5.40831	6.3622e-08	3.36543e-06
ENSMUSG00000033306	Lpp	3333.89	0.891367	0.249482	3.57287	0.000353097	0.0052045
ENSMUSG00000025364	Pa2g4	2185.07	0.887627	0.20494	4.33116	1.48329e-05	0.000367683
ENSMUSG00000020048	Hsp90b1	31039.9	0.887164	0.240553	3.68803	0.000226001	0.00364995
ENSMUSG00000026245	Farsb	1393.32	0.8832	0.164602	5.36566	8.06519e-08	4.14991e-06
ENSMUSG00000028029	Aimp1	374.932	0.864669	0.231851	3.72941	0.000191929	0.00319788
ENSMUSG00000025508	Rplp2	1696.66	0.864595	0.240153	3.60018	0.000318001	0.00476581
ENSMUSG00000002985	Apoe	3630.06	0.860344	0.245672	3.502	0.000461784	0.00641661
ENSMUSG00000031608	Galnt7	2411	0.8592	0.236039	3.64007	0.000272561	0.0042227
ENSMUSG00000028042	Zbtb7b	980.611	0.858956	0.237853	3.61129	0.000304676	0.00461499
ENSMUSG00000034168	Irf2bpl	858.129	0.854767	0.236563	3.61327	0.000302359	0.00459217
ENSMUSG00000015852	Fcrls	24976.3	0.851379	0.157019	5.42213	5.88929e-08	3.14295e-06
ENSMUSG00000048930	Tada3	985.566	0.845061	0.240266	3.51719	0.000436137	0.00611024
ENSMUSG00000061306	Slc38a10	2234.35	0.844305	0.226815	3.72243	0.000197311	0.00327822
ENSMUSG00000016319	Slc25a5	1185.33	0.843718	0.238586	3.53633	0.000405729	0.00578699
ENSMUSG00000025132	Arhgdia	13343	0.837268	0.245577	3.40939	0.000651084	0.00853699
ENSMUSG00000020361	Hspa4	4166.47	0.835726	0.124973	6.68722	2.27444e-11	3.21834e-09
ENSMUSG00000029119	Man2b2	5968.29	0.835611	0.237113	3.5241	0.00042492	0.00599265
ENSMUSG00000006304	Arpc2	7774.76	0.831136	0.184171	4.51284	6.39648e-06	0.00018193
ENSMUSG00000031511	Arhgef7	2247.96	0.828501	0.232178	3.56839	0.000359185	0.0052806
ENSMUSG00000021939	Ctsb	59862.6	0.825036	0.20534	4.01791	5.87175e-05	0.00119547
ENSMUSG00000006390	Elovl1	2097.09	0.82136	0.219547	3.74116	0.000183174	0.00307341
ENSMUSG00000029622	Arpc1b	4769.57	0.814467	0.13791	5.9058	3.50943e-09	2.69639e-07
ENSMUSG00000030062	Rpn1	3396.06	0.813952	0.205263	3.96541	7.32692e-05	0.00145001
ENSMUSG00000058715	Fcer1g	16537.3	0.811208	0.155461	5.21807	1.80799e-07	8.34228e-06
ENSMUSG00000063870	Chd4	5279.85	0.808993	0.233971	3.45766	0.000544896	0.00736651
ENSMUSG00000040552	C3ar1	19125	0.808864	0.172013	4.70235	2.57184e-06	8.32924e-05
ENSMUSG00000004040	Stat3	4868.26	0.805822	0.209682	3.84308	0.000121501	0.00217626
ENSMUSG00000019055	Plod1	5824.78	0.805288	0.188092	4.28136	1.85756e-05	0.000446761
ENSMUSG00000028692	Akr1a1	3224.53	0.803768	0.226991	3.54097	0.000398652	0.00572949
ENSMUSG00000028048	Gba	2971.78	0.799861	0.217957	3.6698	0.000242737	0.00384485
ENSMUSG00000075470	Alg10b	1693.63	0.799644	0.194333	4.11482	3.87483e-05	0.000851159
ENSMUSG00000022136	Dnajc3	4804.01	0.797234	0.217715	3.66183	0.000250421	0.00392989
ENSMUSG00000004530	Coro1c	2300.27	0.785418	0.226971	3.46043	0.000539307	0.00730841
ENSMUSG00000024991	Eif3a	6614.63	0.781543	0.171388	4.56009	5.11312e-06	0.000149177
ENSMUSG00000030824	Nucb1	3168.12	0.778997	0.159195	4.89335	9.91349e-07	3.59682e-05
ENSMUSG00000001783	Rtcb	3060.08	0.777412	0.214774	3.61967	0.000294981	0.00449218
ENSMUSG00000029147	Ppm1g	1380.81	0.775828	0.154213	5.03089	4.88219e-07	2.00241e-05
ENSMUSG00000037685	Atp8a1	14308	0.775634	0.214897	3.60933	0.000306986	0.00464584
ENSMUSG00000041133	Smc1a	2581.21	0.772027	0.22264	3.4676	0.000525133	0.00715631
ENSMUSG00000035382	Pcsk7	790.302	0.766268	0.201921	3.79489	0.000147708	0.00256713
ENSMUSG00000013858	Tmem259	1144.14	0.764857	0.186042	4.1112	3.93613e-05	0.000860208
ENSMUSG00000003429	Rps11	989.483	0.763961	0.213298	3.58167	0.000341409	0.00505857
ENSMUSG00000027006	Dnajc10	1180.09	0.762164	0.192973	3.94958	7.82885e-05	0.00151987
ENSMUSG00000020869	Lrrc59	2150.85	0.759589	0.199345	3.81042	0.000138731	0.00243856
ENSMUSG00000040613	Apobec1	3408.78	0.758522	0.184734	4.10603	4.02523e-05	0.00087179
ENSMUSG00000029705	Cux1	11946.5	0.757338	0.141324	5.35888	8.37395e-08	4.29576e-06
ENSMUSG00000037742	Eef1a1	9160.57	0.756867	0.161594	4.68376	2.81659e-06	9.0237e-05
ENSMUSG00000038965	Ube2l3	2085.14	0.755504	0.190965	3.95625	7.61352e-05	0.00149627
ENSMUSG00000018707	Dync1h1	11035.4	0.753043	0.152564	4.93593	7.9771e-07	3.02346e-05
ENSMUSG00000016494	Cd34	8570.53	0.742345	0.177521	4.18172	2.89306e-05	0.000659386
ENSMUSG00000000957	Mmp14	1442.36	0.74205	0.158071	4.69442	2.67368e-06	8.58206e-05
ENSMUSG00000031207	Msn	23407.1	0.739723	0.171942	4.30217	1.69137e-05	0.000410277
ENSMUSG00000006281	Tep1	2872.85	0.739244	0.204124	3.62155	0.000292843	0.00446879
ENSMUSG00000021624	Cd180	26841.9	0.736051	0.201401	3.65466	0.000257525	0.0040154
ENSMUSG00000058655	Eif4b	3918.12	0.731657	0.116918	6.25785	3.9032e-10	3.94502e-08
ENSMUSG00000009585	Apobec3	5908.51	0.731244	0.199244	3.67009	0.000242468	0.00384417
ENSMUSG00000007458	M6pr	3144.54	0.728703	0.113579	6.41581	1.40073e-10	1.58563e-08
ENSMUSG00000019173	Rab5c	1912.37	0.728314	0.184752	3.94212	8.07639e-05	0.00155838
ENSMUSG00000022814	Umps	878.307	0.727548	0.179495	4.05331	5.04973e-05	0.00105988
ENSMUSG00000022234	Cct5	1742.62	0.723181	0.126904	5.69866	1.20755e-08	7.91669e-07
ENSMUSG00000018293	Pfn1	10847.3	0.720437	0.198438	3.63054	0.00028283	0.00434611
ENSMUSG00000036499	Eea1	1840.29	0.717711	0.195643	3.66848	0.000243996	0.003854
ENSMUSG00000063524	Eno1	2028.69	0.709001	0.201117	3.52531	0.00042298	0.00597025
ENSMUSG00000021339	Mrs2	1222.9	0.703292	0.157989	4.45153	8.52624e-06	0.000229075
ENSMUSG00000037331	Larp1	5203.64	0.681688	0.183309	3.7188	0.000200174	0.00331929
ENSMUSG00000029580	Actb	84179.7	0.6772	0.167749	4.03698	5.41439e-05	0.00111981
ENSMUSG00000032562	Gnai2	13544.7	0.677018	0.139927	4.83837	1.30906e-06	4.61159e-05
ENSMUSG00000035284	Vps13c	6065.98	0.669998	0.19027	3.5213	0.000429436	0.00604128
ENSMUSG00000027111	Itga6	22296.4	0.666501	0.19148	3.48079	0.00049994	0.00687366
ENSMUSG00000030744	Rps3	5076.36	0.645286	0.15784	4.08824	4.34664e-05	0.000931894
ENSMUSG00000061436	Hipk2	4421.46	0.642593	0.162515	3.95406	7.68354e-05	0.00150307
ENSMUSG00000028233	Tgs1	3605.21	0.640045	0.16073	3.98211	6.83055e-05	0.0013629
ENSMUSG00000027177	Hipk3	2413.9	0.627165	0.180922	3.46649	0.00052731	0.00717446
ENSMUSG00000036905	C1qb	69458.4	0.625622	0.152258	4.10897	3.97434e-05	0.000864076
ENSMUSG00000058799	Nap1l1	1096.8	0.623818	0.142619	4.37402	1.21977e-05	0.000314289
ENSMUSG00000039145	Camk1d	8195.56	0.619947	0.173166	3.58008	0.000343493	0.00508501
ENSMUSG00000006736	Tspan31	1036.78	0.609782	0.162047	3.76299	0.000167897	0.0028566
ENSMUSG00000000290	Itgb2	12210.2	0.608664	0.128379	4.74116	2.12494e-06	7.0887e-05
ENSMUSG00000038014	Fam120a	4226.33	0.604487	0.132729	4.5543	5.25615e-06	0.000152043
ENSMUSG00000023944	Hsp90ab1	12603.2	0.601073	0.167739	3.58338	0.000339172	0.00502982
ENSMUSG00000028041	Adam15	6500.34	0.599839	0.175045	3.42677	0.000610805	0.00810905
ENSMUSG00000018848	Rars	1301.18	0.590172	0.148922	3.96295	7.40296e-05	0.00145996
ENSMUSG00000003226	Ranbp2	6105.2	0.585086	0.165829	3.52825	0.00041831	0.00591908
ENSMUSG00000021190	Lgmn	43629.4	0.56626	0.121071	4.6771	2.90962e-06	9.25193e-05
ENSMUSG00000025060	Slk	3240.54	0.565537	0.153504	3.68418	0.000229437	0.00369274
ENSMUSG00000017781	Pitpna	3943.92	0.556397	0.159641	3.48529	0.000491605	0.00678655
ENSMUSG00000027184	Caprin1	8122.92	0.551972	0.152166	3.62743	0.000286259	0.00438293
ENSMUSG00000021998	Lcp1	25825.1	0.54312	0.149676	3.62864	0.000284914	0.00436627
ENSMUSG00000005610	Eif4g2	18135.3	0.509544	0.113531	4.48815	7.18433e-06	0.000199983
ENSMUSG00000021794	Glud1	4631.76	0.508886	0.135801	3.74729	0.000178757	0.00301419
ENSMUSG00000022285	Ywhaz	9525.82	0.485214	0.11306	4.29164	1.77357e-05	0.000427772
ENSMUSG00000037706	Cd81	57254.7	0.470887	0.128288	3.67056	0.000242018	0.00384292
ENSMUSG00000036896	C1qc	65541	0.435777	0.108015	4.0344	5.4743e-05	0.00112808
ENSMUSG00000029860	Zyx	3190.49	0.419942	0.110183	3.8113	0.000138236	0.00243237
ENSMUSG00000016534	Lamp2	18306.2	0.355069	0.0822679	4.31601	1.58872e-05	0.000390964
ENSMUSG00000026395	Ptprc	23751.4	0.29748	0.0799648	3.72013	0.000199119	0.00330502
ENSMUSG00000027620	Rbm39	11152.2	-0.395548	0.111008	-3.56324	0.000366312	0.00536205
ENSMUSG00000037652	Phc3	7270.3	-0.422311	0.12327	-3.42591	0.000612752	0.00812219
ENSMUSG00000026110	Mgat4a	14672.7	-0.42806	0.11784	-3.63257	0.000280612	0.00432769
ENSMUSG00000054387	Mdm4	11177.9	-0.448428	0.0966835	-4.6381	3.51619e-06	0.000107605
ENSMUSG00000048490	Nrip1	11904.7	-0.44929	0.122466	-3.66869	0.0002438	0.003854
ENSMUSG00000038780	Smurf1	1933.93	-0.459484	0.128199	-3.58414	0.000338191	0.00501966
ENSMUSG00000003847	Nfat5	7379.72	-0.466255	0.138576	-3.36463	0.000766476	0.00972703
ENSMUSG00000029313	Aff1	4469.64	-0.467631	0.12231	-3.82333	0.00013166	0.00234093
ENSMUSG00000020580	Rock2	7560.89	-0.472949	0.138585	-3.41269	0.00064325	0.00844732
ENSMUSG00000062078	Qk	33403.6	-0.476336	0.117077	-4.06857	4.73035e-05	0.00100653
ENSMUSG00000030287	Itpr2	7706.01	-0.477228	0.109288	-4.3667	1.26139e-05	0.000321599
ENSMUSG00000022139	Mbnl2	6118.68	-0.477459	0.121962	-3.9148	9.04795e-05	0.00172429
ENSMUSG00000030655	Smg1	12488.4	-0.479562	0.134801	-3.55755	0.000374329	0.00546526
ENSMUSG00000038608	Dock10	27401	-0.498453	0.103991	-4.79324	1.6411e-06	5.67534e-05
ENSMUSG00000051504	Siglech	18486.5	-0.504263	0.108117	-4.66405	3.10044e-06	9.67747e-05
ENSMUSG00000027508	Pag1	36479.9	-0.509454	0.120907	-4.2136	2.51327e-05	0.000581408
ENSMUSG00000078671	Chd2	4546.82	-0.5328	0.137326	-3.87981	0.000104537	0.00192939
ENSMUSG00000025034	Trim8	3143.33	-0.536329	0.15972	-3.35793	0.000785276	0.00989168
ENSMUSG00000044950	Pwwp2a	3647.51	-0.536634	0.121458	-4.41827	9.94921e-06	0.000263965
ENSMUSG00000033392	Clasp2	8076.85	-0.537607	0.1485	-3.62025	0.000294318	0.00448611
ENSMUSG00000049470	Aff4	5223.07	-0.53801	0.140514	-3.82888	0.000128726	0.00229116
ENSMUSG00000026360	Rgs2	11699.8	-0.540169	0.114134	-4.73276	2.21489e-06	7.33116e-05
ENSMUSG00000032097	Ddx6	6412.61	-0.54422	0.148491	-3.665	0.000247339	0.00388872
ENSMUSG00000035161	Ints6	1322.52	-0.553054	0.163388	-3.38491	0.000712017	0.00917999
ENSMUSG00000017707	Serinc3	102571	-0.561867	0.129424	-4.3413	1.41642e-05	0.000352652
ENSMUSG00000031665	Sall1	23472.4	-0.567329	0.166955	-3.3981	0.000678558	0.0088562
ENSMUSG00000041935	AW549877	2948.5	-0.57085	0.158391	-3.60405	0.000313292	0.00471186
ENSMUSG00000022263	Trio	9282.16	-0.57361	0.140061	-4.09544	4.21369e-05	0.000907975
ENSMUSG00000040818	Dennd6a	3567.92	-0.580067	0.171563	-3.38108	0.000722013	0.00928771
ENSMUSG00000055447	Cd47	5791.22	-0.581441	0.157699	-3.68702	0.000226894	0.00365875
ENSMUSG00000021876	Rnase4	12053	-0.581609	0.172686	-3.36802	0.000757102	0.00962245
ENSMUSG00000053580	Tanc2	30634.6	-0.586256	0.174257	-3.36431	0.000767354	0.0097309
ENSMUSG00000018481	Appbp2	2747.25	-0.58642	0.159013	-3.68788	0.000226134	0.00364995
ENSMUSG00000026737	Pip4k2a	9422.78	-0.587121	0.134433	-4.36739	1.2574e-05	0.000321063
ENSMUSG00000026657	Frmd4a	15242	-0.587216	0.155062	-3.78699	0.000152483	0.0026286
ENSMUSG00000030844	Rgs10	4569.06	-0.588444	0.165793	-3.54926	0.000386316	0.00560654
ENSMUSG00000022507	1810013L24Rik	2617.9	-0.591165	0.131968	-4.47959	7.47866e-06	0.000206484
ENSMUSG00000039428	Tmem135	4245.41	-0.592306	0.150915	-3.92476	8.68164e-05	0.00166194
ENSMUSG00000068566	Myadm	6687.05	-0.592483	0.174072	-3.40366	0.000664894	0.00869792
ENSMUSG00000048163	Selplg	46707.1	-0.593434	0.146717	-4.04476	5.23774e-05	0.00109393
ENSMUSG00000029461	Fam168a	3346.89	-0.593874	0.171524	-3.46234	0.000535508	0.00726271
ENSMUSG00000021087	Rtn1	2443.9	-0.595326	0.165036	-3.60726	0.000309449	0.00467478
ENSMUSG00000053774	Ubxn7	2649.54	-0.595475	0.131843	-4.51655	6.28548e-06	0.000179388
ENSMUSG00000052821	Cysltr1	1843	-0.595856	0.176016	-3.38524	0.000711148	0.00917576
ENSMUSG00000031540	Kat6a	9163.96	-0.598446	0.169882	-3.52271	0.000427158	0.0060192
ENSMUSG00000104125	NA	1185.62	-0.598583	0.152772	-3.91814	8.92331e-05	0.00170245
ENSMUSG00000033446	Lpar6	3371.84	-0.604669	0.176847	-3.41916	0.000628141	0.00828737
ENSMUSG00000035649	Zcchc7	5390.79	-0.606415	0.167848	-3.61288	0.000302809	0.00459491
ENSMUSG00000024431	Nr3c1	4013.3	-0.606928	0.139057	-4.36461	1.27348e-05	0.000323709
ENSMUSG00000044583	Tlr7	13634.6	-0.607399	0.143992	-4.21829	2.46162e-05	0.000571797
ENSMUSG00000027763	Mbnl1	25688	-0.610961	0.108499	-5.63103	1.79141e-08	1.11422e-06
ENSMUSG00000028868	Wasf2	15717.9	-0.6125	0.111835	-5.47683	4.33013e-08	2.4186e-06
ENSMUSG00000045817	Zfp36l2	4467.69	-0.615065	0.182599	-3.36839	0.000756099	0.00961689
ENSMUSG00000038872	Zfhx3	39866.1	-0.61685	0.137468	-4.48723	7.21547e-06	0.000200521
ENSMUSG00000002107	Celf2	13472.5	-0.619297	0.115661	-5.35441	8.58379e-08	4.39015e-06
ENSMUSG00000024457	Trim26	2556.56	-0.634158	0.119396	-5.3114	1.08788e-07	5.35424e-06
ENSMUSG00000109498	NA	5848.15	-0.63525	0.185112	-3.4317	0.000599804	0.00799424
ENSMUSG00000034342	Cbl	11722.6	-0.638108	0.143656	-4.44191	8.91641e-06	0.000238051
ENSMUSG00000064373	Selenop	24138.5	-0.639851	0.13924	-4.59532	4.32084e-06	0.000129169
ENSMUSG00000027751	Supt20	5840.76	-0.643796	0.185084	-3.47839	0.00050443	0.00691859
ENSMUSG00000014195	Dnajc7	2597.06	-0.646081	0.19048	-3.39185	0.000694213	0.00900257
ENSMUSG00000060657	Marf1	6955.49	-0.647436	0.177778	-3.64183	0.000270705	0.00419778
ENSMUSG00000069495	Epc2	1413.51	-0.653252	0.148903	-4.38711	1.14866e-05	0.000297841
ENSMUSG00000039531	Zup1	3297.09	-0.661367	0.127622	-5.18222	2.19261e-07	9.98136e-06
ENSMUSG00000056608	Chd9	15982.3	-0.661415	0.17428	-3.79513	0.000147566	0.00256713
ENSMUSG00000055322	Tns1	5633.2	-0.664152	0.140096	-4.74068	2.12998e-06	7.09158e-05
ENSMUSG00000104292	NA	4411.3	-0.678281	0.176137	-3.85088	0.000117693	0.00212825
ENSMUSG00000029817	Tra2a	3857.69	-0.679049	0.198093	-3.42792	0.000608218	0.00808102
ENSMUSG00000035954	Dock4	15370.1	-0.682216	0.167317	-4.07739	4.55438e-05	0.000972746
ENSMUSG00000027381	Bcl2l11	1678.05	-0.684896	0.176016	-3.89111	9.9788e-05	0.00186601
ENSMUSG00000034610	Tut4	1667.54	-0.686135	0.163024	-4.20881	2.56722e-05	0.000591471
ENSMUSG00000033713	Foxn3	6070.65	-0.688708	0.177193	-3.88676	0.00010159	0.00188938
ENSMUSG00000026748	Plxdc2	24056.6	-0.689902	0.160075	-4.30987	1.63348e-05	0.000400817
ENSMUSG00000031785	Adgrg1	16130	-0.690075	0.17868	-3.86208	0.000112425	0.00204607
ENSMUSG00000053436	Mapk14	5457.57	-0.691299	0.188459	-3.66817	0.000244295	0.00385514
ENSMUSG00000075595	Zfp652	12932.8	-0.693217	0.148955	-4.65386	3.25779e-06	0.000100944
ENSMUSG00000060090	Rp2	4405.33	-0.696751	0.170505	-4.08639	4.38132e-05	0.000938144
ENSMUSG00000021495	Fam193b	2166.67	-0.701629	0.172901	-4.05797	4.95001e-05	0.00104153
ENSMUSG00000024242	Map4k3	1678.55	-0.7028	0.207801	-3.38207	0.00071941	0.00926124
ENSMUSG00000030516	Tjp1	9361.74	-0.702905	0.180668	-3.89058	0.000100004	0.00186601
ENSMUSG00000042628	Zfyve1	1474.52	-0.70474	0.183098	-3.84897	0.000118616	0.00214265
ENSMUSG00000022228	Zscan26	2124.9	-0.707878	0.199262	-3.5525	0.000381585	0.00555211
ENSMUSG00000029647	Pan3	10227.3	-0.710012	0.168403	-4.21615	2.48508e-05	0.000576456
ENSMUSG00000021706	Zfyve16	1133.78	-0.710995	0.184765	-3.8481	0.000119037	0.00214798
ENSMUSG00000005534	Insr	4513.52	-0.710997	0.203703	-3.49037	0.000482352	0.0066751
ENSMUSG00000034636	Zyg11b	4592.17	-0.718167	0.188598	-3.80793	0.000140133	0.00245812
ENSMUSG00000038740	Mvb12b	4490.4	-0.71942	0.19398	-3.70873	0.000208302	0.0034273
ENSMUSG00000038831	Ralgps1	2420.76	-0.728444	0.186231	-3.9115	9.17236e-05	0.00174408
ENSMUSG00000033004	Mycbp2	13112.8	-0.728473	0.186364	-3.90887	9.27288e-05	0.00176122
ENSMUSG00000024174	Pot1b	1039.42	-0.732813	0.202492	-3.61897	0.000295781	0.00450033
ENSMUSG00000085095	NA	6059.96	-0.73683	0.146696	-5.02283	5.09164e-07	2.06339e-05
ENSMUSG00000020709	Adap2	6870.14	-0.73871	0.206556	-3.57632	0.000348467	0.00514967
ENSMUSG00000047888	Tnrc6b	9997.63	-0.739211	0.201825	-3.66264	0.000249632	0.00392114
ENSMUSG00000026158	Ogfrl1	5207.49	-0.74259	0.215457	-3.44659	0.000567718	0.00764461
ENSMUSG00000048897	Zfp710	8157.74	-0.746094	0.190952	-3.90723	9.33613e-05	0.00176731
ENSMUSG00000029290	Zfp326	1465.98	-0.75009	0.202821	-3.69828	0.000217064	0.00353379
ENSMUSG00000049659	Aftph	8043.68	-0.750668	0.21948	-3.42021	0.000625736	0.00826847
ENSMUSG00000035967	Ints6l	12522.6	-0.750974	0.163977	-4.57974	4.65561e-06	0.000137482
ENSMUSG00000029919	Hpgds	14962	-0.75588	0.163988	-4.60936	4.03901e-06	0.000121385
ENSMUSG00000039046	Usp6nl	855.698	-0.756146	0.193611	-3.90549	9.40336e-05	0.00177607
ENSMUSG00000048756	Foxo3	3553.19	-0.757669	0.225779	-3.3558	0.000791347	0.00995339
ENSMUSG00000034560	Washc4	5139.01	-0.758176	0.183167	-4.13926	3.48433e-05	0.000779145
ENSMUSG00000015597	Zfp318	2204.59	-0.760071	0.215323	-3.52991	0.000415694	0.00589189
ENSMUSG00000032698	Lmo2	2675.69	-0.763935	0.181095	-4.21843	2.46011e-05	0.000571797
ENSMUSG00000066026	Dhrs3	4328.14	-0.76564	0.205155	-3.73202	0.000189954	0.00317154
ENSMUSG00000039852	Rere	6896.16	-0.770936	0.175813	-4.38497	1.16003e-05	0.000300265
ENSMUSG00000109363	NA	2788.2	-0.772338	0.180987	-4.26736	1.97798e-05	0.00047371
ENSMUSG00000023094	Msrb2	472.665	-0.775306	0.225714	-3.4349	0.000592765	0.00790664
ENSMUSG00000026761	Orc4	2005.7	-0.778265	0.176416	-4.41154	1.02637e-05	0.000271459
ENSMUSG00000069729	Arid1b	2046.42	-0.780308	0.230152	-3.3904	0.000697913	0.00903934
ENSMUSG00000029771	Irf5	4535.78	-0.780882	0.158121	-4.93851	7.8722e-07	2.99997e-05
ENSMUSG00000029213	Commd8	4452.64	-0.78327	0.183173	-4.27612	1.90182e-05	0.00045676
ENSMUSG00000052331	Ankrd44	7859.33	-0.7833	0.165527	-4.73217	2.22136e-06	7.33828e-05
ENSMUSG00000014905	Dnajb9	1260.55	-0.784159	0.225543	-3.47677	0.0005075	0.00695508
ENSMUSG00000032434	Cmtm6	10905.2	-0.785481	0.160818	-4.88429	1.03802e-06	3.74216e-05
ENSMUSG00000027339	Rassf2	12331.8	-0.786989	0.140642	-5.5957	2.19736e-08	1.34698e-06
ENSMUSG00000021271	Zfp839	1108.91	-0.789177	0.203434	-3.87928	0.000104767	0.00193153
ENSMUSG00000022020	Naa16	1353.06	-0.790112	0.234535	-3.36885	0.000754836	0.00960803
ENSMUSG00000038371	Sbf2	5252.34	-0.79645	0.160523	-4.96161	6.99118e-07	2.71028e-05
ENSMUSG00000038822	Hace1	848.955	-0.79733	0.131287	-6.07318	1.25406e-09	1.12073e-07
ENSMUSG00000024451	Arap3	5845.74	-0.801834	0.194025	-4.13262	3.58648e-05	0.000799192
ENSMUSG00000020883	Fbxl20	5143.26	-0.801943	0.187872	-4.26856	1.96738e-05	0.000471838
ENSMUSG00000069874	Irgm2	2794.18	-0.802127	0.179205	-4.47604	7.60413e-06	0.000208255
ENSMUSG00000035620	Ric8b	869.008	-0.802609	0.179761	-4.46487	8.01165e-06	0.000217313
ENSMUSG00000024383	Map3k2	3390.58	-0.802742	0.210277	-3.81754	0.00013479	0.00238396
ENSMUSG00000103509	NA	1744.83	-0.804775	0.236579	-3.40173	0.000669618	0.00875298
ENSMUSG00000035133	Arhgap5	10102.7	-0.804922	0.203805	-3.94948	7.83205e-05	0.00151987
ENSMUSG00000026034	Clk1	8323.25	-0.808409	0.231137	-3.49754	0.000469577	0.00650891
ENSMUSG00000014470	Rnf166	1283.64	-0.808435	0.220091	-3.67318	0.000239551	0.00381718
ENSMUSG00000020719	Ddx5	20666.7	-0.80869	0.205648	-3.93241	8.40997e-05	0.00161723
ENSMUSG00000034724	Cnot6l	3614.26	-0.808878	0.202822	-3.98813	6.65974e-05	0.00133631
ENSMUSG00000004661	Arid3b	2539.75	-0.809503	0.195588	-4.13881	3.4911e-05	0.000779145
ENSMUSG00000014361	Mertk	23768.2	-0.809815	0.139706	-5.79657	6.76854e-09	4.78898e-07
ENSMUSG00000001687	Ubl3	6488.82	-0.812448	0.186347	-4.35986	1.30147e-05	0.000330327
ENSMUSG00000026254	Eif4e2	2805.25	-0.814733	0.232143	-3.50962	0.000448746	0.00625248
ENSMUSG00000028630	Dyrk2	3060.44	-0.816346	0.230852	-3.53624	0.000405871	0.00578699
ENSMUSG00000032549	Rab6b	2910.56	-0.816851	0.229192	-3.56405	0.000365172	0.00535214
ENSMUSG00000073436	Eme2	348.325	-0.821671	0.240672	-3.41407	0.00063999	0.00841102
ENSMUSG00000038342	Mlxip	5330.95	-0.821985	0.186391	-4.41	1.0337e-05	0.000272549
ENSMUSG00000044408	Sptssa	666.738	-0.823093	0.16433	-5.00877	5.47801e-07	2.19379e-05
ENSMUSG00000074825	Itpripl1	3266.49	-0.823246	0.155791	-5.28431	1.26179e-07	6.1744e-06
ENSMUSG00000029229	Chic2	1647.66	-0.826736	0.216334	-3.82157	0.000132605	0.0023528
ENSMUSG00000032265	Tent5a	3269.77	-0.827577	0.164718	-5.0242	5.05543e-07	2.05362e-05
ENSMUSG00000038349	Plcl1	1135.12	-0.82828	0.20939	-3.95567	7.63191e-05	0.00149642
ENSMUSG00000023026	Dip2b	16910.8	-0.833946	0.185473	-4.49632	6.91394e-06	0.000194047
ENSMUSG00000059495	Arhgef12	2003.21	-0.837285	0.230616	-3.63064	0.000282718	0.00434611
ENSMUSG00000026027	Stradb	819.742	-0.83858	0.248778	-3.37079	0.000749523	0.00955473
ENSMUSG00000029765	Plxna4	4031.38	-0.847766	0.117982	-7.18556	6.69315e-13	1.26277e-10
ENSMUSG00000026430	Rassf5	1688.09	-0.848818	0.235389	-3.60601	0.000310935	0.00468888
ENSMUSG00000109576	NA	1280.27	-0.851692	0.253412	-3.3609	0.000776904	0.00981181
ENSMUSG00000062202	Btbd9	2153.93	-0.85522	0.204028	-4.19168	2.76899e-05	0.000632806
ENSMUSG00000108621	Gm33989	7743.36	-0.855308	0.172149	-4.96842	6.7502e-07	2.6349e-05
ENSMUSG00000026565	Pou2f1	3593.88	-0.855997	0.210046	-4.07528	4.59599e-05	0.000980402
ENSMUSG00000024776	Stambpl1	1896.29	-0.857796	0.176273	-4.8663	1.13708e-06	4.03926e-05
ENSMUSG00000028273	Pdlim5	2115.18	-0.860957	0.192298	-4.47721	7.56261e-06	0.000207453
ENSMUSG00000070942	Il1rl2	2864.39	-0.865389	0.179982	-4.80821	1.52291e-06	5.30984e-05
ENSMUSG00000016087	Fli1	5063.06	-0.865521	0.203041	-4.26279	2.01892e-05	0.000480803
ENSMUSG00000044066	Cep68	4826.09	-0.869433	0.229513	-3.78816	0.000151767	0.00261891
ENSMUSG00000104235	NA	2554.64	-0.870888	0.195342	-4.45827	8.26236e-06	0.00022269
ENSMUSG00000020536	Llgl1	318.388	-0.872595	0.258516	-3.3754	0.000737092	0.0094459
ENSMUSG00000032122	Slc37a2	2294.27	-0.878101	0.236694	-3.70985	0.00020738	0.003424
ENSMUSG00000028556	Dock7	3149.06	-0.878879	0.254079	-3.45907	0.000542035	0.00733951
ENSMUSG00000034453	Polr3b	1169.7	-0.880157	0.248975	-3.53512	0.000407584	0.00580116
ENSMUSG00000029513	Prkab1	2186.48	-0.880913	0.259192	-3.39868	0.000677107	0.00884406
ENSMUSG00000027882	Stxbp3	1779.51	-0.881994	0.25404	-3.47187	0.000516838	0.00707093
ENSMUSG00000032035	Ets1	4452.25	-0.885982	0.257	-3.44741	0.000565999	0.00762751
ENSMUSG00000020409	Slu7	1162.55	-0.887208	0.188684	-4.70208	2.5753e-06	8.32924e-05
ENSMUSG00000038910	Plcl2	3181.43	-0.887809	0.159381	-5.57035	2.54234e-08	1.5094e-06
ENSMUSG00000036362	P2ry13	28038.5	-0.888656	0.224177	-3.96409	7.36762e-05	0.00145468
ENSMUSG00000103159	NA	1008.44	-0.898254	0.239456	-3.75123	0.000175968	0.00297603
ENSMUSG00000033769	Exoc6b	2031.61	-0.900166	0.217413	-4.14035	3.46781e-05	0.000778793
ENSMUSG00000021200	Asb2	966.033	-0.902077	0.223255	-4.04057	5.33208e-05	0.00110947
ENSMUSG00000030067	Foxp1	2218.05	-0.906893	0.22095	-4.10452	4.05161e-05	0.000876386
ENSMUSG00000109245	NA	8218.76	-0.908859	0.157176	-5.78244	7.36237e-09	5.16583e-07
ENSMUSG00000107468	NA	894.253	-0.909429	0.224135	-4.0575	4.96008e-05	0.00104235
ENSMUSG00000021936	Mapk8	1137.46	-0.918698	0.177981	-5.16179	2.44602e-07	1.09877e-05
ENSMUSG00000044072	Eml6	634.342	-0.918837	0.161947	-5.67368	1.39763e-08	9.05793e-07
ENSMUSG00000041762	Gpr155	4284.57	-0.919049	0.22063	-4.16558	3.10568e-05	0.000701257
ENSMUSG00000074794	Arrdc3	755.842	-0.921138	0.265786	-3.46571	0.00052884	0.00718952
ENSMUSG00000064141	Zfp69	332.797	-0.922274	0.265656	-3.47169	0.000517202	0.00707093
ENSMUSG00000062761	Zfp512	1693.39	-0.92424	0.221749	-4.16796	3.07342e-05	0.000695823
ENSMUSG00000030629	Zfand6	1383.42	-0.926526	0.261684	-3.54063	0.000399175	0.00572949
ENSMUSG00000041112	Elmo1	15407.9	-0.926609	0.156582	-5.91773	3.26409e-09	2.54333e-07
ENSMUSG00000026126	Ptpn18	1060.36	-0.927156	0.268701	-3.45051	0.000559524	0.00755224
ENSMUSG00000102719	NA	2801.77	-0.929037	0.22024	-4.2183	2.46156e-05	0.000571797
ENSMUSG00000020064	Herc4	2379.01	-0.932269	0.24235	-3.84679	0.000119676	0.00215494
ENSMUSG00000039770	Ypel5	2526.58	-0.933	0.252789	-3.69082	0.000223529	0.00361478
ENSMUSG00000105304	NA	848.682	-0.936969	0.17864	-5.24502	1.56268e-07	7.38475e-06
ENSMUSG00000032534	Cep63	1575.55	-0.937956	0.2789	-3.36305	0.000770863	0.00976082
ENSMUSG00000029676	Pot1a	1423.15	-0.939091	0.148849	-6.30902	2.80815e-10	2.96164e-08
ENSMUSG00000032870	Smap2	14308.4	-0.941616	0.193421	-4.86821	1.12614e-06	4.00876e-05
ENSMUSG00000031627	Irf2	2603.15	-0.941872	0.215482	-4.371	1.2368e-05	0.000317234
ENSMUSG00000005360	Slc1a3	2229.26	-0.942357	0.266145	-3.54076	0.000398972	0.00572949
ENSMUSG00000071042	Rasgrp3	14159.6	-0.942605	0.167872	-5.61502	1.96534e-08	1.21794e-06
ENSMUSG00000040746	Rnf167	2120.48	-0.943464	0.237879	-3.96615	7.30443e-05	0.00144725
ENSMUSG00000035399	Oser1	157.067	-0.943966	0.281067	-3.35851	0.000783631	0.00987828
ENSMUSG00000038895	Zfp653	602.946	-0.944133	0.17766	-5.31427	1.07088e-07	5.30133e-06
ENSMUSG00000029385	Ccng2	5110.1	-0.945669	0.260309	-3.63286	0.000280293	0.00432671
ENSMUSG00000026425	Srgap2	27572	-0.950407	0.126569	-7.50898	5.95907e-14	1.36736e-11
ENSMUSG00000020263	Appl2	2044.12	-0.952662	0.276565	-3.44462	0.000571853	0.00767983
ENSMUSG00000056234	Ncoa4	1125.15	-0.954938	0.28155	-3.39172	0.000694544	0.00900257
ENSMUSG00000113313	NA	781.528	-0.956701	0.264586	-3.61584	0.000299373	0.0045509
ENSMUSG00000108897	NA	5242.38	-0.958541	0.144612	-6.62838	3.39385e-11	4.61021e-09
ENSMUSG00000006127	Inpp5k	1552.83	-0.95873	0.278835	-3.43834	0.000585287	0.00782274
ENSMUSG00000117613	NA	5815.69	-0.958803	0.200106	-4.79147	1.65567e-06	5.70124e-05
ENSMUSG00000030064	Frmd4b	11441.5	-0.958895	0.193182	-4.96368	6.91696e-07	2.69381e-05
ENSMUSG00000040651	Tasor	4113.89	-0.960073	0.222996	-4.30534	1.66728e-05	0.000406175
ENSMUSG00000026189	Pecr	446.327	-0.961941	0.266729	-3.60643	0.000310433	0.00468547
ENSMUSG00000104443	NA	383.462	-0.962383	0.265016	-3.63141	0.000281879	0.00433935
ENSMUSG00000050965	Prkca	1639.38	-0.965875	0.264035	-3.65814	0.000254055	0.00397224
ENSMUSG00000027799	Nbea	3248.47	-0.966678	0.16318	-5.92401	3.14185e-09	2.48133e-07
ENSMUSG00000037940	Inpp4b	3307.03	-0.968952	0.2289	-4.23309	2.30505e-05	0.000540605
ENSMUSG00000020101	Vsir	20593.3	-0.969954	0.0974804	-9.95025	2.51557e-23	2.51261e-20
ENSMUSG00000030557	Mef2a	32421.8	-0.970109	0.125532	-7.728	1.09248e-14	2.89848e-12
ENSMUSG00000101823	NA	852.804	-0.970216	0.274177	-3.53864	0.000402188	0.00576022
ENSMUSG00000030148	Clec4a2	853.657	-0.972744	0.27956	-3.47956	0.000502243	0.00689975
ENSMUSG00000022010	Tsc22d1	457.53	-0.973969	0.289767	-3.36121	0.000776019	0.00981147
ENSMUSG00000007613	Tgfbr1	44498.3	-0.974464	0.181445	-5.37058	7.84841e-08	4.05064e-06
ENSMUSG00000021224	Numb	7545.49	-0.976252	0.174991	-5.57887	2.42089e-08	1.45768e-06
ENSMUSG00000071669	Snx29	1872.68	-0.982816	0.254957	-3.85482	0.000115813	0.00210097
ENSMUSG00000047180	Neurl3	1849.94	-0.984109	0.261858	-3.75818	0.000171154	0.0029004
ENSMUSG00000061371	Zfp873	568.969	-0.989277	0.254235	-3.89118	9.97559e-05	0.00186601
ENSMUSG00000054517	Trim65	3533.17	-0.989991	0.240386	-4.11833	3.8162e-05	0.000840454
ENSMUSG00000110235	Gm5086	2034.35	-0.993197	0.184525	-5.38246	7.34733e-08	3.81522e-06
ENSMUSG00000027424	Mgme1	646.491	-0.995298	0.27027	-3.6826	0.000230868	0.00370974
ENSMUSG00000040723	Rcsd1	5169.43	-0.996238	0.227969	-4.37007	1.24209e-05	0.00031763
ENSMUSG00000022849	Hspbap1	605.72	-0.996751	0.289415	-3.44402	0.000573131	0.00768702
ENSMUSG00000029714	Gigyf1	1322.61	-1.00002	0.202505	-4.93826	7.88227e-07	2.99997e-05
ENSMUSG00000105842	NA	995.611	-1.0057	0.211196	-4.76192	1.91764e-06	6.4606e-05
ENSMUSG00000040236	Trappc5	678.404	-1.00798	0.206283	-4.88639	1.02703e-06	3.71042e-05
ENSMUSG00000103696	NA	1029.7	-1.01048	0.270243	-3.73914	0.000184653	0.00309518
ENSMUSG00000045098	Kmt5b	3780.49	-1.01129	0.235339	-4.29719	1.7298e-05	0.000417809
ENSMUSG00000059588	Calcrl	1197.88	-1.01671	0.277837	-3.65938	0.000252828	0.0039567
ENSMUSG00000045867	Cradd	671.17	-1.01852	0.301982	-3.37277	0.000744148	0.00950047
ENSMUSG00000022747	St3gal6	9167.99	-1.02023	0.197744	-5.15935	2.47804e-07	1.10729e-05
ENSMUSG00000040410	Fbxl4	734.614	-1.02429	0.200377	-5.1118	3.19102e-07	1.39289e-05
ENSMUSG00000074748	Atxn7l3b	2089.04	-1.02705	0.290245	-3.53855	0.000402333	0.00576022
ENSMUSG00000031714	Gab1	2183.15	-1.02851	0.277691	-3.70381	0.000212388	0.00347433
ENSMUSG00000027665	Pik3ca	2080.15	-1.03458	0.210357	-4.91823	8.73311e-07	3.26626e-05
ENSMUSG00000001741	Il16	3284.5	-1.03467	0.288658	-3.58443	0.00033781	0.00501851
ENSMUSG00000024074	Crim1	878.526	-1.03951	0.278755	-3.72913	0.000192145	0.00319788
ENSMUSG00000019699	Akt3	1275.06	-1.04471	0.293844	-3.5553	0.000377543	0.00550746
ENSMUSG00000024985	Tcf7l2	2614.5	-1.04524	0.247982	-4.21497	2.49808e-05	0.000578683
ENSMUSG00000020696	Rffl	1747.69	-1.04547	0.287388	-3.63782	0.000274954	0.00425589
ENSMUSG00000020102	Slc16a7	1645.29	-1.04696	0.287888	-3.6367	0.000276152	0.00427055
ENSMUSG00000044068	Zrsr1	663.545	-1.05048	0.301593	-3.4831	0.000495643	0.00682564
ENSMUSG00000024055	Cyp4f13	1846.14	-1.05769	0.311562	-3.3948	0.000686777	0.00894284
ENSMUSG00000117404	NA	2128.03	-1.05857	0.285585	-3.70667	0.000209999	0.0034452
ENSMUSG00000020423	Btg2	1955.81	-1.06412	0.215501	-4.93788	7.89745e-07	2.99997e-05
ENSMUSG00000017679	Ttpal	1720.73	-1.06641	0.269803	-3.95253	7.7329e-05	0.00151099
ENSMUSG00000028080	Lrba	2825.43	-1.06928	0.217537	-4.91539	8.86062e-07	3.30667e-05
ENSMUSG00000050471	Fam118b	1686.83	-1.07026	0.296609	-3.60833	0.000308179	0.00465974
ENSMUSG00000024696	Lpxn	859.045	-1.07113	0.24101	-4.44435	8.81568e-06	0.00023578
ENSMUSG00000027947	Il6ra	13865.5	-1.07458	0.162853	-6.59846	4.15445e-11	5.38493e-09
ENSMUSG00000029512	Ulk1	1991.94	-1.0804	0.268615	-4.02213	5.76752e-05	0.00117849
ENSMUSG00000036769	Wdr44	3209.27	-1.0832	0.231324	-4.68263	2.83218e-06	9.05658e-05
ENSMUSG00000027428	Rbbp9	598.42	-1.0841	0.317029	-3.41955	0.000627239	0.0082819
ENSMUSG00000113204	Gm46430	567.669	-1.08443	0.227243	-4.77213	1.82287e-06	6.19046e-05
ENSMUSG00000034557	Zfyve9	786.915	-1.08704	0.301764	-3.60229	0.000315431	0.00473984
ENSMUSG00000004151	Etv1	1241.07	-1.08754	0.246722	-4.40795	1.04354e-05	0.000274473
ENSMUSG00000035776	Cd99l2	584.728	-1.08781	0.28391	-3.83152	0.000127355	0.00227152
ENSMUSG00000043004	Gng2	1994.64	-1.08837	0.231099	-4.70951	2.48307e-06	8.06168e-05
ENSMUSG00000026594	Ralgps2	1591.55	-1.09024	0.261246	-4.17324	3.00296e-05	0.000682602
ENSMUSG00000113557	NA	1130.16	-1.0933	0.229097	-4.7722	1.8222e-06	6.19046e-05
ENSMUSG00000069895	Atxn1l	1788.21	-1.09976	0.305039	-3.60531	0.000311786	0.00469755
ENSMUSG00000005803	Sqor	1555.89	-1.10161	0.300576	-3.66501	0.000247329	0.00388872
ENSMUSG00000037822	Smim14	3344.31	-1.11578	0.239001	-4.6685	3.03409e-06	9.5229e-05
ENSMUSG00000005533	Igf1r	2960.37	-1.11907	0.3064	-3.65232	0.000259882	0.00404472
ENSMUSG00000097385	NA	455.067	-1.12405	0.265618	-4.23182	2.31811e-05	0.000542917
ENSMUSG00000105176	NA	983.921	-1.12554	0.305643	-3.68253	0.00023093	0.00370974
ENSMUSG00000029922	Mkrn1	1824.43	-1.12632	0.258893	-4.35052	1.35817e-05	0.000342161
ENSMUSG00000092341	Malat1	247173	-1.1267	0.208694	-5.39881	6.70849e-08	3.53758e-06
ENSMUSG00000072294	Klf12	2049.18	-1.1311	0.326187	-3.46765	0.000525038	0.00715631
ENSMUSG00000027784	Ppm1l	740.676	-1.13286	0.223657	-5.0652	4.07981e-07	1.71899e-05
ENSMUSG00000058690	Ccser2	1197.89	-1.14075	0.336276	-3.3923	0.000693076	0.00899727
ENSMUSG00000117430	NA	1041.86	-1.14432	0.286948	-3.98791	6.66582e-05	0.00133631
ENSMUSG00000109652	NA	1950.45	-1.14486	0.233042	-4.9127	8.98318e-07	3.33044e-05
ENSMUSG00000042106	Inka1	799.172	-1.1498	0.278266	-4.13203	3.59567e-05	0.000800191
ENSMUSG00000045730	Adrb2	1987.07	-1.15196	0.292533	-3.93787	8.22074e-05	0.00158263
ENSMUSG00000019818	Cd164	16876.2	-1.15763	0.183659	-6.30317	2.91626e-10	3.05668e-08
ENSMUSG00000040663	Clcf1	1982.98	-1.15835	0.325497	-3.55872	0.000372673	0.00544577
ENSMUSG00000049538	Adamts16	638.095	-1.15845	0.195761	-5.91767	3.26529e-09	2.54333e-07
ENSMUSG00000022436	Sh3bp1	800.126	-1.16956	0.345774	-3.38244	0.000718448	0.00925588
ENSMUSG00000023150	Ivns1abp	29596	-1.16976	0.234953	-4.9787	6.4012e-07	2.52584e-05
ENSMUSG00000022106	Rcbtb2	4758.26	-1.17505	0.170441	-6.8942	5.417e-12	9.0177e-10
ENSMUSG00000040430	Pitpnc1	2799.08	-1.18067	0.322129	-3.66521	0.000247133	0.00388872
ENSMUSG00000020387	Jade2	3045.45	-1.18156	0.232046	-5.09193	3.54436e-07	1.53003e-05
ENSMUSG00000089857	Zfp882	341.993	-1.1833	0.291467	-4.05983	4.91092e-05	0.00103716
ENSMUSG00000045672	Col27a1	7300.77	-1.19348	0.227246	-5.25195	1.50496e-07	7.17816e-06
ENSMUSG00000034265	Zdhhc14	752.851	-1.20216	0.276683	-4.34491	1.39333e-05	0.000349465
ENSMUSG00000022708	Zbtb20	5100.75	-1.20878	0.265111	-4.55952	5.12703e-06	0.000149326
ENSMUSG00000045038	Prkce	630.899	-1.21725	0.313635	-3.88111	0.00010398	0.00192328
ENSMUSG00000110397	NA	2204.4	-1.21919	0.209061	-5.83174	5.48538e-09	4.03211e-07
ENSMUSG00000103321	NA	614.552	-1.2206	0.273876	-4.45678	8.31999e-06	0.000223888
ENSMUSG00000040325	Dcaf1	943.554	-1.22517	0.302525	-4.0498	5.12606e-05	0.00107325
ENSMUSG00000024462	Gabbr1	2071.59	-1.2256	0.260698	-4.70124	2.58584e-06	8.34745e-05
ENSMUSG00000040771	Oard1	587.504	-1.23462	0.325509	-3.79291	0.000148894	0.00257718
ENSMUSG00000103038	NA	375.081	-1.2363	0.34689	-3.56395	0.00036532	0.00535214
ENSMUSG00000031732	Phlpp2	1074.2	-1.23716	0.366804	-3.37281	0.000744041	0.00950047
ENSMUSG00000039137	Whrn	2215.7	-1.2402	0.293708	-4.22256	2.4154e-05	0.000563373
ENSMUSG00000089774	Slc5a3	1231.95	-1.24286	0.230807	-5.38483	7.25112e-08	3.77681e-06
ENSMUSG00000073609	D2hgdh	572.389	-1.24308	0.270889	-4.5889	4.45592e-06	0.0001325
ENSMUSG00000109539	NA	2621.49	-1.24613	0.183495	-6.79109	1.11286e-11	1.71785e-09
ENSMUSG00000022848	Slc49a4	1400.89	-1.24817	0.302712	-4.12329	3.73501e-05	0.000827944
ENSMUSG00000035236	Scai	1057.55	-1.26729	0.242796	-5.21955	1.79362e-07	8.29855e-06
ENSMUSG00000076431	Sox4	1133.24	-1.26897	0.270039	-4.6992	2.61181e-06	8.41528e-05
ENSMUSG00000032470	Mras	1048.3	-1.26925	0.360335	-3.52241	0.000427641	0.00602101
ENSMUSG00000054364	Rhob	15930.2	-1.26956	0.213454	-5.94768	2.71966e-09	2.19904e-07
ENSMUSG00000025277	Abhd6	570.391	-1.27317	0.369834	-3.44254	0.000576288	0.00772326
ENSMUSG00000030330	Ing4	445.178	-1.2782	0.308789	-4.13941	3.48207e-05	0.000779145
ENSMUSG00000024975	Pdcd4	1671.27	-1.28114	0.286086	-4.47817	7.5285e-06	0.000206914
ENSMUSG00000033033	Calhm2	2473.26	-1.2841	0.376115	-3.41411	0.000639916	0.00841102
ENSMUSG00000056592	Zfp658	1477.29	-1.28881	0.259288	-4.97058	6.67535e-07	2.61169e-05
ENSMUSG00000076287	NA	353.397	-1.28887	0.381243	-3.38071	0.000722999	0.00929336
ENSMUSG00000021460	Auh	1035.61	-1.28929	0.266012	-4.84675	1.25501e-06	4.43036e-05
ENSMUSG00000087177	E130307A14Rik	619.127	-1.29471	0.377361	-3.43095	0.000601477	0.00801026
ENSMUSG00000026473	Glul	22218.2	-1.30166	0.249209	-5.22315	1.75902e-07	8.16072e-06
ENSMUSG00000046027	Stard5	1084.74	-1.30781	0.247799	-5.27769	1.30822e-07	6.34674e-06
ENSMUSG00000085118	NA	1069.76	-1.31087	0.331908	-3.94951	7.83111e-05	0.00151987
ENSMUSG00000090185	NA	400.736	-1.3122	0.191904	-6.83778	8.04305e-12	1.31318e-09
ENSMUSG00000041797	Abca9	27554.8	-1.31329	0.172386	-7.61827	2.57091e-14	6.32668e-12
ENSMUSG00000052698	Tln2	2704	-1.31564	0.268774	-4.89496	9.83253e-07	3.57508e-05
ENSMUSG00000025357	Dgka	522.657	-1.31828	0.258911	-5.09162	3.55023e-07	1.53003e-05
ENSMUSG00000021983	Atp8a2	7070.01	-1.3211	0.222528	-5.93677	2.90698e-09	2.33719e-07
ENSMUSG00000106847	Peg13	632.173	-1.32325	0.373649	-3.54143	0.00039796	0.00572949
ENSMUSG00000035064	Eef2k	3813.83	-1.32669	0.268268	-4.9454	7.59896e-07	2.91924e-05
ENSMUSG00000042182	Bend6	386.574	-1.32916	0.34366	-3.86765	0.000109889	0.00200852
ENSMUSG00000040229	Gpr34	8135.01	-1.33143	0.198743	-6.69925	2.09496e-11	3.04038e-09
ENSMUSG00000051034	Zfp11	239.309	-1.33884	0.347036	-3.85793	0.000114352	0.00207669
ENSMUSG00000084964	NA	4582.4	-1.34008	0.187613	-7.14281	9.14435e-13	1.68773e-10
ENSMUSG00000006850	Tmco6	712.272	-1.34119	0.277446	-4.83407	1.3377e-06	4.70272e-05
ENSMUSG00000062861	Zfp28	183.962	-1.34291	0.365367	-3.6755	0.000237386	0.00379193
ENSMUSG00000039115	Itga9	3435.07	-1.3468	0.36446	-3.69533	0.000219603	0.00356829
ENSMUSG00000056529	Ptafr	3739.95	-1.34714	0.285155	-4.72423	2.30993e-06	7.55733e-05
ENSMUSG00000009828	Ick	1042.08	-1.34826	0.267168	-5.04647	4.50051e-07	1.85933e-05
ENSMUSG00000032333	Stoml1	384.788	-1.34897	0.399808	-3.37405	0.000740712	0.00947085
ENSMUSG00000058192	Zfp846	776.202	-1.34984	0.275109	-4.90656	9.26886e-07	3.414e-05
ENSMUSG00000109243	NA	1457.3	-1.35308	0.25805	-5.24349	1.57566e-07	7.40122e-06
ENSMUSG00000038860	Garnl3	1168.72	-1.35395	0.22423	-6.03819	1.55853e-09	1.36411e-07
ENSMUSG00000038168	P3h2	1735.75	-1.35497	0.210653	-6.43221	1.25762e-10	1.45062e-08
ENSMUSG00000034165	Ccnd3	2083.67	-1.35713	0.195984	-6.92471	4.36882e-12	7.41825e-10
ENSMUSG00000055435	Maf	9868.29	-1.35918	0.171166	-7.94072	2.01017e-15	6.44013e-13
ENSMUSG00000103869	NA	3340.5	-1.3613	0.254734	-5.34401	9.09128e-08	4.62576e-06
ENSMUSG00000037972	Snn	2012.32	-1.36204	0.219599	-6.20238	5.5616e-10	5.45873e-08
ENSMUSG00000050103	Agmo	1530.51	-1.36236	0.370486	-3.67722	0.000235792	0.00377501
ENSMUSG00000034563	Ccpg1	167.887	-1.36358	0.342553	-3.98065	6.87272e-05	0.00136937
ENSMUSG00000113183	NA	384.944	-1.36604	0.406463	-3.36079	0.000777202	0.00981181
ENSMUSG00000020593	Lpin1	1386.55	-1.36752	0.223961	-6.10606	1.02118e-09	9.3224e-08
ENSMUSG00000048120	Entpd1	17684.5	-1.36834	0.170723	-8.01497	1.1016e-15	3.74103e-13
ENSMUSG00000105368	NA	467.966	-1.37182	0.311225	-4.40781	1.04423e-05	0.000274473
ENSMUSG00000043384	Gprasp1	1218.46	-1.37389	0.208927	-6.57594	4.83466e-11	6.17238e-09
ENSMUSG00000029581	Fscn1	4482.08	-1.38298	0.278925	-4.95826	7.11273e-07	2.74487e-05
ENSMUSG00000036353	P2ry12	44068.7	-1.38607	0.183998	-7.53304	4.95714e-14	1.16906e-11
ENSMUSG00000086264	Gm15850	525.124	-1.38721	0.341566	-4.06132	4.87962e-05	0.00103312
ENSMUSG00000040848	Sft2d2	8172.56	-1.39178	0.234728	-5.92935	3.04145e-09	2.42459e-07
ENSMUSG00000101778	NA	1835.22	-1.39817	0.24333	-5.74598	9.1388e-09	6.18234e-07
ENSMUSG00000110652	Gm33023	285.149	-1.40144	0.303074	-4.62409	3.76246e-06	0.000114287
ENSMUSG00000105728	NA	668.406	-1.40514	0.322342	-4.35916	1.30565e-05	0.00033057
ENSMUSG00000104145	NA	333.094	-1.4315	0.377481	-3.79224	0.000149295	0.0025815
ENSMUSG00000040270	Bach2	2310.62	-1.44979	0.219012	-6.61967	3.59996e-11	4.85138e-09
ENSMUSG00000028976	Slc2a5	3947.22	-1.45394	0.198852	-7.31168	2.63813e-13	5.27006e-11
ENSMUSG00000048249	Crebrf	2943.16	-1.45715	0.279516	-5.21312	1.85687e-07	8.5446e-06
ENSMUSG00000087484	NA	220.406	-1.47343	0.422796	-3.48496	0.000492206	0.00678932
ENSMUSG00000038393	Txnip	6876.96	-1.47698	0.258412	-5.7156	1.09317e-08	7.25077e-07
ENSMUSG00000075122	Cd80	493.805	-1.49446	0.31046	-4.81372	1.4815e-06	5.1761e-05
ENSMUSG00000031613	Hpgd	7691.84	-1.4957	0.235996	-6.33782	2.33044e-10	2.52402e-08
ENSMUSG00000041837	Pdcd7	332.814	-1.50496	0.39593	-3.80107	0.000144074	0.00251945
ENSMUSG00000042207	Kdm5b	2032.95	-1.50928	0.264517	-5.70581	1.15791e-08	7.6503e-07
ENSMUSG00000024193	Phf1	511.946	-1.51989	0.359765	-4.22468	2.39282e-05	0.000558872
ENSMUSG00000042246	Tmc7	1499.78	-1.52685	0.158168	-9.65339	4.75585e-22	3.80513e-19
ENSMUSG00000052534	Pbx1	1033.71	-1.52709	0.279355	-5.4665	4.59009e-08	2.53051e-06
ENSMUSG00000031012	Cask	1705.64	-1.52796	0.272295	-5.61142	2.00668e-08	1.23903e-06
ENSMUSG00000103916	NA	221.748	-1.54846	0.392886	-3.94125	8.10589e-05	0.00156229
ENSMUSG00000021356	Irf4	402.238	-1.55242	0.360645	-4.30457	1.67309e-05	0.000407006
ENSMUSG00000035686	Thrsp	591.275	-1.55476	0.438494	-3.54568	0.000391608	0.00567821
ENSMUSG00000026721	Rabgap1l	412.151	-1.56762	0.423948	-3.69768	0.000217578	0.00353877
ENSMUSG00000079481	Nhsl2	761.765	-1.5732	0.319798	-4.91933	8.6839e-07	3.25503e-05
ENSMUSG00000047146	Tet1	494.362	-1.57503	0.307092	-5.12887	2.91484e-07	1.27891e-05
ENSMUSG00000113856	Gm10790	1061.55	-1.58538	0.23856	-6.64562	3.01951e-11	4.16839e-09
ENSMUSG00000051007	Gatd1	452.001	-1.58649	0.465513	-3.40805	0.000654292	0.00857244
ENSMUSG00000005043	Sgsh	282.82	-1.59318	0.398872	-3.99423	6.49061e-05	0.00130581
ENSMUSG00000109556	NA	114.787	-1.59699	0.423518	-3.77077	0.000162747	0.00278573
ENSMUSG00000032609	Klhdc8b	911.497	-1.61112	0.388177	-4.15048	3.31774e-05	0.000746162
ENSMUSG00000091908	NA	313.248	-1.61266	0.439758	-3.66715	0.000245273	0.00386698
ENSMUSG00000037363	Letm2	420.907	-1.61762	0.414527	-3.90232	9.52751e-05	0.00179752
ENSMUSG00000091119	Ccdc152	214.554	-1.61914	0.464841	-3.48322	0.000495421	0.00682564
ENSMUSG00000078490	Cfap74	2244.65	-1.62356	0.27048	-6.0025	1.94306e-09	1.63333e-07
ENSMUSG00000025993	Slc40a1	2856.48	-1.63007	0.215295	-7.57132	3.69454e-14	8.83567e-12
ENSMUSG00000085227	6330418K02Rik	411.738	-1.64457	0.416369	-3.94979	7.8221e-05	0.00151987
ENSMUSG00000024534	Sncaip	866.154	-1.65556	0.463031	-3.57549	0.000349575	0.00516156
ENSMUSG00000108950	NA	458.48	-1.65736	0.472469	-3.50788	0.000451696	0.00628672
ENSMUSG00000045268	Zfp691	1918.97	-1.66163	0.358261	-4.63805	3.51713e-06	0.000107605
ENSMUSG00000022311	Csmd3	8423.26	-1.66263	0.181512	-9.15985	5.19673e-20	3.15145e-17
ENSMUSG00000034055	Phka1	941.7	-1.67411	0.360062	-4.64952	3.32712e-06	0.000102717
ENSMUSG00000081809	NA	140.106	-1.67449	0.475632	-3.52055	0.000430651	0.00605335
ENSMUSG00000038569	Rad9b	272.127	-1.68307	0.463711	-3.62956	0.000283905	0.00435474
ENSMUSG00000039759	Thap3	595.454	-1.68453	0.453743	-3.71252	0.000205202	0.00339272
ENSMUSG00000086491	NA	283.368	-1.69364	0.449599	-3.76701	0.000165212	0.00281751
ENSMUSG00000099039	NA	56.5202	-1.70195	0.498175	-3.41637	0.000634629	0.00835998
ENSMUSG00000083796	NA	195.157	-1.70455	0.347589	-4.90393	9.3939e-07	3.44511e-05
ENSMUSG00000117814	NA	323.265	-1.70581	0.445198	-3.83158	0.000127323	0.00227152
ENSMUSG00000021108	Prkch	1140.89	-1.71317	0.388278	-4.41222	1.02318e-05	0.000271039
ENSMUSG00000117956	NA	262.89	-1.71782	0.398992	-4.3054	1.66686e-05	0.000406175
ENSMUSG00000061393	Acvr2b	1011.07	-1.7205	0.347087	-4.95697	7.16003e-07	2.75686e-05
ENSMUSG00000103230	NA	303.868	-1.72978	0.46388	-3.72894	0.000192287	0.00319788
ENSMUSG00000116946	NA	276.648	-1.73441	0.503533	-3.44449	0.000572143	0.00767983
ENSMUSG00000047793	Sned1	166.248	-1.76479	0.512841	-3.4412	0.000579133	0.00774915
ENSMUSG00000021959	Lats2	1128.59	-1.78027	0.337452	-5.27564	1.32296e-07	6.39995e-06
ENSMUSG00000019944	Rhobtb1	1376.17	-1.78178	0.365145	-4.87965	1.06274e-06	3.80704e-05
ENSMUSG00000044501	Zfp758	286.865	-1.78538	0.444666	-4.0151	5.94206e-05	0.00120834
ENSMUSG00000102732	NA	1131.17	-1.79106	0.303948	-5.89266	3.80038e-09	2.89374e-07
ENSMUSG00000029299	Abcg3	135.982	-1.79325	0.483715	-3.70725	0.00020952	0.00344067
ENSMUSG00000021775	Nr1d2	1811.46	-1.79492	0.29864	-6.01031	1.85169e-09	1.56427e-07
ENSMUSG00000096870	NA	457.302	-1.80302	0.27022	-6.67242	2.51626e-11	3.50214e-09
ENSMUSG00000033174	Mgll	617.565	-1.81076	0.439535	-4.11972	3.79335e-05	0.000837594
ENSMUSG00000024309	Pfdn6	210.812	-1.81207	0.411662	-4.40183	1.07341e-05	0.000281707
ENSMUSG00000102277	NA	479.149	-1.81767	0.403557	-4.50411	6.66512e-06	0.000187996
ENSMUSG00000050855	Zfp940	199.802	-1.82504	0.423864	-4.30573	1.66437e-05	0.000406175
ENSMUSG00000035919	Bbs9	1748.49	-1.82851	0.462363	-3.95471	7.66269e-05	0.00150072
ENSMUSG00000030711	Sult1a1	1020.34	-1.84184	0.366574	-5.02447	5.04816e-07	2.05362e-05
ENSMUSG00000086006	Gm13293	759.182	-1.84398	0.44022	-4.18878	2.80461e-05	0.000640084
ENSMUSG00000035067	Xkr6	313.019	-1.85198	0.499258	-3.70946	0.000207698	0.003424
ENSMUSG00000079164	Tlr5	342.897	-1.8635	0.403134	-4.62253	3.79096e-06	0.000114947
ENSMUSG00000103146	NA	561.033	-1.86368	0.544565	-3.42232	0.000620884	0.00822357
ENSMUSG00000093594	NA	552.72	-1.86597	0.373084	-5.00149	5.68903e-07	2.27294e-05
ENSMUSG00000023826	Prkn	529.877	-1.88217	0.34036	-5.52995	3.20323e-08	1.83753e-06
ENSMUSG00000090622	A930033H14Rik	867.891	-1.90574	0.387876	-4.91327	8.957e-07	3.32849e-05
ENSMUSG00000104116	NA	216.483	-1.91091	0.527658	-3.62148	0.000292919	0.00446879
ENSMUSG00000106288	NA	220.605	-1.92972	0.355494	-5.42828	5.68982e-08	3.08668e-06
ENSMUSG00000052676	Zmat1	320.118	-1.936	0.517806	-3.73885	0.000184864	0.00309565
ENSMUSG00000039166	Akap7	349.938	-1.93648	0.445051	-4.35115	1.35428e-05	0.000341735
ENSMUSG00000029343	Crybb1	1965.53	-1.93985	0.351857	-5.51316	3.52447e-08	2.00824e-06
ENSMUSG00000086874	NA	114.935	-1.94062	0.544869	-3.56163	0.00036856	0.00539031
ENSMUSG00000020034	Tcp11l2	468.356	-1.97319	0.566136	-3.48536	0.000491473	0.00678655
ENSMUSG00000104108	NA	640.729	-1.97357	0.38449	-5.13294	2.85252e-07	1.25807e-05
ENSMUSG00000089035	NA	37.8098	-1.99077	0.537412	-3.70438	0.000211912	0.00346988
ENSMUSG00000099689	Zfp383	185.429	-1.99162	0.560901	-3.55075	0.000384134	0.00557964
ENSMUSG00000103793	Pcdhga6	104.206	-2.00238	0.568975	-3.51927	0.000432735	0.00607259
ENSMUSG00000058756	Thra	296.362	-2.01093	0.418606	-4.80387	1.55629e-06	5.41513e-05
ENSMUSG00000047264	Zfp358	458.509	-2.01328	0.346092	-5.81718	5.98485e-09	4.32437e-07
ENSMUSG00000031431	Tsc22d3	1731.77	-2.01984	0.385057	-5.24556	1.55805e-07	7.38475e-06
ENSMUSG00000026986	Hnmt	401.74	-2.0268	0.281693	-7.19506	6.24345e-13	1.19117e-10
ENSMUSG00000075015	NA	425.609	-2.02807	0.522534	-3.88122	0.000103932	0.00192328
ENSMUSG00000030757	Zkscan2	130.829	-2.0378	0.550888	-3.69911	0.000216357	0.00352567
ENSMUSG00000010721	Lmbr1	208.101	-2.04716	0.417345	-4.9052	9.33318e-07	3.43025e-05
ENSMUSG00000075014	NA	1817.31	-2.0871	0.47572	-4.38724	1.148e-05	0.000297841
ENSMUSG00000109680	NA	244.041	-2.11836	0.576116	-3.67696	0.000236027	0.00377501
ENSMUSG00000029186	Pi4k2b	198.952	-2.13313	0.550941	-3.8718	0.000108033	0.00197672
ENSMUSG00000118423	NA	215.824	-2.17332	0.424795	-5.11617	3.11809e-07	1.36457e-05
ENSMUSG00000104918	NA	686.438	-2.1735	0.418404	-5.19474	2.05001e-07	9.35731e-06
ENSMUSG00000098243	NA	305.887	-2.18815	0.583383	-3.75079	0.00017628	0.00297834
ENSMUSG00000056671	Prelid2	84.4788	-2.18904	0.650473	-3.3653	0.000764599	0.00971047
ENSMUSG00000003949	Hlf	936.591	-2.19731	0.419075	-5.24323	1.57788e-07	7.40122e-06
ENSMUSG00000114864	NA	644.624	-2.24574	0.41136	-5.45931	4.77991e-08	2.62663e-06
ENSMUSG00000028654	Mycl	354.409	-2.25264	0.430614	-5.23122	1.68394e-07	7.83377e-06
ENSMUSG00000042377	Fam83g	76.9802	-2.28277	0.59873	-3.81268	0.000137468	0.00242138
ENSMUSG00000108850	NA	263.603	-2.29733	0.619299	-3.70957	0.000207614	0.003424
ENSMUSG00000103220	NA	120.803	-2.29901	0.558032	-4.11986	3.79101e-05	0.000837594
ENSMUSG00000113987	NA	70.1146	-2.30772	0.62291	-3.70474	0.000211609	0.00346826
ENSMUSG00000113852	NA	241.73	-2.30789	0.653752	-3.53022	0.000415221	0.00589011
ENSMUSG00000084978	NA	125.461	-2.31196	0.652091	-3.54546	0.000391923	0.00567821
ENSMUSG00000015966	Il17rb	92.6156	-2.32866	0.657545	-3.54144	0.000397947	0.00572949
ENSMUSG00000024901	Peli3	61.2774	-2.33283	0.601634	-3.87749	0.000105539	0.00193945
ENSMUSG00000073590	NA	732.38	-2.33305	0.211637	-11.0238	2.93312e-28	4.98044e-25
ENSMUSG00000049536	Tceal1	57.0722	-2.37141	0.633018	-3.7462	0.000179533	0.00302427
ENSMUSG00000103223	NA	694.421	-2.3838	0.42618	-5.59341	2.22659e-08	1.35553e-06
ENSMUSG00000066170	NA	99.1689	-2.41105	0.427121	-5.64488	1.65298e-08	1.03954e-06
ENSMUSG00000086938	4930481A15Rik	350.641	-2.43786	0.553907	-4.4012	1.07653e-05	0.00028209
ENSMUSG00000117698	BC037704	188.178	-2.44152	0.534816	-4.56517	4.9909e-06	0.000146365
ENSMUSG00000072673	NA	180.574	-2.44602	0.688654	-3.55189	0.00038248	0.00556037
ENSMUSG00000097781	9330136K24Rik	173.639	-2.46374	0.695209	-3.54389	0.000394274	0.00570253
ENSMUSG00000020108	Ddit4	664.442	-2.48449	0.6725	-3.6944	0.000220402	0.00357785
ENSMUSG00000060212	Pcnx2	359.742	-2.493	0.533895	-4.66945	3.0201e-06	9.49654e-05
ENSMUSG00000087395	NA	47.9628	-2.51194	0.62686	-4.00718	6.14491e-05	0.00124511
ENSMUSG00000117285	NA	183.233	-2.5744	0.680714	-3.78191	0.000155632	0.00267202
ENSMUSG00000104676	NA	108.589	-2.57572	0.755387	-3.4098	0.000650098	0.00853065
ENSMUSG00000051331	Cacna1c	54.2039	-2.58125	0.765479	-3.37207	0.000746054	0.00951765
ENSMUSG00000031523	Dlc1	308.358	-2.58802	0.560868	-4.61431	3.94396e-06	0.000119101
ENSMUSG00000088916	NA	43.3892	-2.6127	0.731186	-3.57323	0.0003526	0.00520169
ENSMUSG00000022099	Dmtn	172.967	-2.65526	0.776987	-3.41737	0.000632285	0.00833556
ENSMUSG00000117121	NA	232.02	-2.66547	0.523714	-5.08956	3.58898e-07	1.54281e-05
ENSMUSG00000090257	NA	588.253	-2.68487	0.370549	-7.24566	4.3033e-13	8.3034e-11
ENSMUSG00000031210	Gpr165	2048.78	-2.69359	0.231073	-11.6569	2.11595e-31	4.4911e-28
ENSMUSG00000028133	Rwdd3	192.652	-2.70138	0.804697	-3.35702	0.000787876	0.00991707
ENSMUSG00000091472	NA	165.788	-2.7894	0.55113	-5.06124	4.16535e-07	1.74206e-05
ENSMUSG00000102674	8030442B05Rik	382.381	-2.84198	0.561342	-5.06284	4.13055e-07	1.73177e-05
ENSMUSG00000076618	NA	50.3884	-2.85562	0.696549	-4.09966	4.13752e-05	0.000892694
ENSMUSG00000086119	NA	86.5148	-2.86381	0.605617	-4.72874	2.25915e-06	7.43417e-05
ENSMUSG00000107966	NA	234.385	-2.89591	0.606433	-4.77532	1.79425e-06	6.13006e-05
ENSMUSG00000059401	Mamld1	149.288	-2.93805	0.795748	-3.69218	0.000222337	0.00359893
ENSMUSG00000084749	NA	36.6873	-2.94709	0.526892	-5.59335	2.22728e-08	1.35553e-06
ENSMUSG00000020889	Nr1d1	594.065	-2.97546	0.428815	-6.93878	3.95487e-12	6.83482e-10
ENSMUSG00000103144	Pcdhga1	219.858	-2.98957	0.736294	-4.0603	4.90099e-05	0.00103635
ENSMUSG00000024168	Tmem204	437.395	-2.9934	0.66923	-4.47291	7.71636e-06	0.000210311
ENSMUSG00000091695	NA	81.386	-3.05587	0.738353	-4.13876	3.49193e-05	0.000779145
ENSMUSG00000071226	Cecr2	133.886	-3.11047	0.740726	-4.19921	2.67844e-05	0.000612936
ENSMUSG00000065387	NA	52.805	-3.11676	0.82865	-3.76125	0.000169063	0.00287069
ENSMUSG00000038026	Kcnj9	125.955	-3.16602	0.641724	-4.93362	8.07211e-07	3.05266e-05
ENSMUSG00000102894	NA	402.415	-3.21407	0.896625	-3.58463	0.000337553	0.00501851
ENSMUSG00000033966	Cdkl4	75.262	-3.22898	0.791575	-4.07919	4.51938e-05	0.000966488
ENSMUSG00000100183	NA	54.8944	-3.24054	0.798373	-4.05893	4.92973e-05	0.00103984
ENSMUSG00000041479	Syt15	65.4897	-3.41571	0.790152	-4.32286	1.54023e-05	0.000380132
ENSMUSG00000019761	Krt10	126.951	-3.48173	0.772383	-4.50778	6.55089e-06	0.000185082
ENSMUSG00000080468	Mir1195	24.8101	-3.48529	1.00486	-3.46844	0.000523493	0.00714542
ENSMUSG00000047867	Gimap6	267.337	-3.52044	0.774795	-4.54371	5.52725e-06	0.000159343
ENSMUSG00000079388	2610042L04Rik	14.7551	-3.53457	0.899417	-3.92985	8.50005e-05	0.00163086
ENSMUSG00000023781	Hes7	26.2321	-3.56384	0.935799	-3.80834	0.000139901	0.00245659
ENSMUSG00000090941	NA	20.5702	-3.62382	0.946404	-3.82905	0.000128641	0.00229116
ENSMUSG00000108912	NA	60.4351	-3.67574	0.794051	-4.6291	3.67265e-06	0.00011196
ENSMUSG00000036949	Slc39a12	86.8268	-3.79522	0.982887	-3.8613	0.000112784	0.00205041
ENSMUSG00000102704	NA	232.372	-3.86746	1.1476	-3.37005	0.000751552	0.00957341
ENSMUSG00000112352	NA	41.003	-3.93081	1.03427	-3.80057	0.000144366	0.00252195
ENSMUSG00000116180	NA	135.98	-4.03651	1.1855	-3.40489	0.000661898	0.0086654
ENSMUSG00000030994	D7Ertd443e	121.13	-4.10077	0.910808	-4.50234	6.72088e-06	0.000189255
ENSMUSG00000022240	Ctnnd2	691.531	-4.18644	0.384262	-10.8947	1.22102e-27	1.88481e-24
ENSMUSG00000071036	NA	218.215	-4.19568	1.02584	-4.08999	4.31386e-05	0.000926034
ENSMUSG00000058022	Adtrp	32.2432	-4.3413	1.11424	-3.89621	9.77103e-05	0.00183328
ENSMUSG00000113216	NA	162.69	-4.58565	0.62477	-7.33974	2.14009e-13	4.43155e-11
ENSMUSG00000089908	NA	95.6253	-4.89046	1.25466	-3.89784	9.70559e-05	0.00182504
ENSMUSG00000115100	NA	17.437	-4.8996	1.37323	-3.56793	0.000359815	0.0052806
ENSMUSG00000025746	Il6	95.24	-5.06366	0.623069	-8.12697	4.40145e-16	1.66082e-13
ENSMUSG00000046456	Tmem150b	100.176	-5.64177	1.06216	-5.3116	1.08666e-07	5.35424e-06
ENSMUSG00000105810	NA	24.0837	-6.07216	1.66239	-3.65268	0.000259522	0.00404283
ENSMUSG00000095991	NA	9.11565	-6.61698	1.60529	-4.12198	3.75629e-05	0.000831575
ENSMUSG00000110910	NA	53.2536	-7.53527	2.01296	-3.74338	0.000181563	0.00305255
ENSMUSG00000114812	NA	50.42	-8.35536	2.07489	-4.0269	5.65164e-05	0.0011604
ENSMUSG00000079444	NA	33.2127	-8.47959	2.00113	-4.23741	2.26114e-05	0.000531774
ENSMUSG00000091370	5730435O14Rik	35.2046	-8.56409	2.00852	-4.26388	2.00909e-05	0.000479695
ENSMUSG00000103189	NA	35.9578	-8.59383	2.18827	-3.92722	8.59336e-05	0.0016469
ENSMUSG00000107012	NA	75.3879	-8.93906	1.80162	-4.96169	6.98825e-07	2.71028e-05
ENSMUSG00000058626	Capn11	84.8692	-9.83435	2.84358	-3.45845	0.000543303	0.00735082

## Sheet: FemaleCSF1vsFemaleControl
Ensembl_ID	Gene_ID	baseMean	log2FoldChange	lfcSE	stat	pvalue	padj
ENSMUSG00000041064	Pif1	83.4816	9.79667	1.39311	7.03223	2.03265e-12	4.00974e-09
ENSMUSG00000044201	Cdc25c	59.9665	9.3186	1.33167	6.99769	2.60221e-12	4.52705e-09
ENSMUSG00000024989	Cep55	78.6082	8.98495	1.34517	6.67941	2.39909e-11	3.27641e-08
ENSMUSG00000035683	Melk	50.0474	8.33118	1.35157	6.16407	7.08985e-10	6.29366e-07
ENSMUSG00000027654	Fam83d	44.9623	8.17799	1.6309	5.01439	5.32014e-07	0.000174914
ENSMUSG00000026683	Nuf2	138.066	8.08572	1.11822	7.2309	4.79799e-13	1.41973e-09
ENSMUSG00000068101	Cenpm	41.8306	8.07284	1.22217	6.60534	3.9661e-11	5.02959e-08
ENSMUSG00000112932	NA	23.5437	7.96981	2.01252	3.96011	7.49148e-05	0.00880819
ENSMUSG00000022619	Mapk8ip2	20.6493	7.77934	1.83399	4.24175	2.21783e-05	0.00348455
ENSMUSG00000026873	Phf19	95.5724	7.58715	1.23938	6.12176	9.25502e-10	7.82446e-07
ENSMUSG00000036223	Ska1	27.1925	7.44803	1.69437	4.39575	1.1039e-05	0.00194046
ENSMUSG00000054150	Syne3	15.7011	7.38372	1.70251	4.33695	1.44472e-05	0.00249025
ENSMUSG00000034883	Lrr1	13.7107	7.19356	1.77953	4.04239	5.29098e-05	0.00701015
ENSMUSG00000027469	Tpx2	343.902	7.13293	0.750464	9.5047	2.00631e-21	2.18637e-17
ENSMUSG00000106560	NA	12.0796	7.00536	1.77586	3.94477	7.98768e-05	0.00914924
ENSMUSG00000022033	Pbk	162.589	6.964	0.739938	9.4116	4.88651e-21	2.89183e-17
ENSMUSG00000082871	NA	11.4513	6.93327	1.77356	3.90924	9.25867e-05	0.00996233
ENSMUSG00000054072	Iigp1	17.7353	6.82868	1.71152	3.98982	6.61221e-05	0.00804063
ENSMUSG00000002055	Spag5	108.304	6.7651	1.2015	5.63056	1.79629e-08	1.06304e-05
ENSMUSG00000015880	Ncapg	108.045	6.69627	0.917442	7.29885	2.90243e-13	1.03059e-09
ENSMUSG00000039396	Neil3	102.03	6.54717	1.0083	6.49326	8.40009e-11	9.32095e-08
ENSMUSG00000001403	Ube2c	274.433	6.28127	1.37325	4.57402	4.78445e-06	0.00104868
ENSMUSG00000017724	Etv4	22.2445	5.80969	1.20061	4.83897	1.30516e-06	0.000392741
ENSMUSG00000042489	Clspn	90.5685	5.79856	0.983361	5.89668	3.70895e-09	2.86299e-06
ENSMUSG00000020185	E2f7	71.3705	5.79366	1.29547	4.47224	7.74053e-06	0.00147769
ENSMUSG00000046591	Ticrr	57.0667	5.78488	1.01492	5.69983	1.19929e-08	7.34215e-06
ENSMUSG00000052688	Rab7b	33.4676	5.78052	1.30282	4.43693	9.12502e-06	0.00167016
ENSMUSG00000021676	Iqgap2	39.1633	5.77438	1.21801	4.74083	2.12842e-06	0.000581353
ENSMUSG00000078773	Rad54b	30.0121	5.73619	1.20946	4.74279	2.10798e-06	0.000581353
ENSMUSG00000051378	Kif18b	218.189	5.72589	0.813536	7.03828	1.94628e-12	4.00974e-09
ENSMUSG00000098055	NA	17.9973	5.6008	1.43	3.91663	8.97943e-05	0.00988309
ENSMUSG00000020493	Prr11	370.878	5.55762	0.773103	7.18871	6.54049e-13	1.65886e-09
ENSMUSG00000024791	Cdca5	68.0696	5.54384	1.17339	4.72464	2.30526e-06	0.000610859
ENSMUSG00000046179	E2f8	110.823	5.51813	0.938559	5.87936	4.11858e-09	3.04672e-06
ENSMUSG00000026039	Sgo2a	119.027	5.49511	0.956386	5.7457	9.15421e-09	5.80442e-06
ENSMUSG00000037474	Dtl	109.955	5.42631	0.572194	9.48333	2.46296e-21	2.18637e-17
ENSMUSG00000031262	Cenpi	71.576	5.37793	1.02659	5.23866	1.61751e-07	6.52665e-05
ENSMUSG00000041445	Mmrn2	45.7103	5.33051	1.25628	4.2431	2.20454e-05	0.00348455
ENSMUSG00000031016	Wee1	86.2351	5.23741	0.982334	5.3316	9.73537e-08	4.43184e-05
ENSMUSG00000032783	Troap	128.359	5.23087	0.994883	5.25777	1.45811e-07	6.33097e-05
ENSMUSG00000046295	Ankle1	122.467	5.22419	1.08441	4.81755	1.45335e-06	0.000416174
ENSMUSG00000049539	Hist1h1a	76.7898	5.1792	1.26988	4.07851	4.53257e-05	0.00628682
ENSMUSG00000051457	Spn	50.6743	5.06511	0.921597	5.49602	3.88463e-08	2.11202e-05
ENSMUSG00000032254	Kif23	311.527	5.05846	0.658907	7.67705	1.62793e-14	7.22555e-11
ENSMUSG00000044986	Tst	25.0452	5.00377	1.23567	4.04945	5.13375e-05	0.0069049
ENSMUSG00000033952	Aspm	556.991	4.93351	1.0916	4.51952	6.19791e-06	0.0012092
ENSMUSG00000021714	Cenpk	36.3005	4.91294	1.06581	4.60956	4.03521e-06	0.000930405
ENSMUSG00000012443	Kif11	417.559	4.82948	1.17818	4.0991	4.14763e-05	0.00584421
ENSMUSG00000030830	Itgal	30.363	4.74902	1.10849	4.28424	1.83365e-05	0.00301432
ENSMUSG00000027331	Knstrn	252.07	4.6965	1.00334	4.68087	2.85656e-06	0.000714302
ENSMUSG00000034641	Cd300ld	32.4047	4.65138	1.02197	4.55138	5.32959e-06	0.00112879
ENSMUSG00000026193	Fn1	249.512	4.60076	0.918395	5.00956	5.45537e-07	0.000176099
ENSMUSG00000110175	NA	30.5652	4.57254	1.14542	3.99201	6.55143e-05	0.00802166
ENSMUSG00000019942	Cdk1	189.848	4.54126	0.695574	6.5288	6.63006e-11	7.84734e-08
ENSMUSG00000032218	Ccnb2	232.492	4.51958	0.64684	6.98717	2.80487e-12	4.52705e-09
ENSMUSG00000041498	Kif14	169.828	4.38336	0.842208	5.2046	1.9441e-07	7.67011e-05
ENSMUSG00000031004	Mki67	2473.03	4.3487	0.68042	6.39119	1.64597e-10	1.62347e-07
ENSMUSG00000023908	Pkmyt1	82.0597	4.15964	0.68713	6.05364	1.41605e-09	1.14276e-06
ENSMUSG00000035365	Parpbp	65.4974	4.13367	0.958684	4.31182	1.61916e-05	0.00276021
ENSMUSG00000033031	Cip2a	178.592	4.0662	0.799654	5.08494	3.67738e-07	0.000136017
ENSMUSG00000057246	BC051142	66.6785	4.05116	0.868821	4.66282	3.11907e-06	0.000738347
ENSMUSG00000040084	Bub1b	304.814	4.01289	0.634907	6.32045	2.60811e-10	2.43707e-07
ENSMUSG00000020330	Hmmr	376.757	3.94341	0.730571	5.39771	6.74986e-08	3.23884e-05
ENSMUSG00000024922	Ovol1	29.7692	3.85586	0.972558	3.96466	7.35008e-05	0.00869955
ENSMUSG00000028678	Kif2c	132.982	3.85076	0.872631	4.41282	1.02032e-05	0.00181147
ENSMUSG00000027326	Knl1	350.348	3.81976	0.726566	5.25728	1.46204e-07	6.33097e-05
ENSMUSG00000075031	Hist1h2bb	70.883	3.8114	0.695397	5.48091	4.23154e-08	2.19152e-05
ENSMUSG00000040387	Klhl32	77.4347	3.71384	0.707934	5.24602	1.55417e-07	6.41691e-05
ENSMUSG00000032860	P2ry2	43.6239	3.67117	0.937931	3.91411	9.07369e-05	0.00988309
ENSMUSG00000034413	Neurl1b	249.277	3.65895	0.794558	4.605	4.12456e-06	0.000938813
ENSMUSG00000114279	Hist1h2bm	45.8206	3.64152	0.778466	4.67782	2.89946e-06	0.000714958
ENSMUSG00000051220	Ercc6l	77.0311	3.55427	0.836495	4.249	2.14725e-05	0.00343443
ENSMUSG00000027699	Ect2	132.241	3.40204	0.748762	4.54355	5.53143e-06	0.00112879
ENSMUSG00000022034	Esco2	125.702	3.36465	0.783263	4.29568	1.7416e-05	0.00291702
ENSMUSG00000036777	Anln	466.801	3.34861	0.740736	4.52065	6.16513e-06	0.0012092
ENSMUSG00000017146	Brca1	111.437	3.25382	0.77822	4.1811	2.90101e-05	0.0044021
ENSMUSG00000026068	Il18rap	302.95	3.13521	0.597062	5.25107	1.51222e-07	6.39235e-05
ENSMUSG00000074802	Gas2l3	660.226	3.10829	0.567494	5.47723	4.32033e-08	2.19152e-05
ENSMUSG00000006398	Cdc20	135.906	3.07581	0.738955	4.16238	3.14954e-05	0.00473872
ENSMUSG00000071068	Treml2	343.529	2.87384	0.514967	5.58063	2.39644e-08	1.37246e-05
ENSMUSG00000030867	Plk1	166.911	2.84495	0.649536	4.37997	1.18695e-05	0.002066
ENSMUSG00000036768	Kif15	376.507	2.82651	0.605427	4.66863	3.03217e-06	0.000727476
ENSMUSG00000029177	Cenpa	624.925	2.81346	0.559268	5.03062	4.88905e-07	0.000164314
ENSMUSG00000036067	Slc2a6	405.499	2.80587	0.572479	4.90125	9.52269e-07	0.000291493
ENSMUSG00000072082	Ccnf	220.234	2.77039	0.548371	5.05204	4.37122e-07	0.00015217
ENSMUSG00000034795	Ccdc122	53.0219	2.6489	0.54885	4.82628	1.39109e-06	0.000411622
ENSMUSG00000034023	Fancd2	145.861	2.6393	0.586684	4.49867	6.83786e-06	0.00131956
ENSMUSG00000081152	NA	37.7129	2.49607	0.633489	3.9402	8.14148e-05	0.00920205
ENSMUSG00000027074	Slc43a3	235.716	2.43777	0.363802	6.70083	2.07237e-11	3.06607e-08
ENSMUSG00000074785	Plxnc1	107.214	2.12544	0.51237	4.14826	3.35014e-05	0.00495653
ENSMUSG00000045502	Hcar2	279.563	2.00477	0.434898	4.60974	4.03174e-06	0.000930405
ENSMUSG00000049932	H2afx	764.62	1.91955	0.478009	4.01572	5.92649e-05	0.00748196
ENSMUSG00000002602	Axl	1481.2	1.8735	0.378054	4.95563	7.20959e-07	0.00022456
ENSMUSG00000017412	Cacnb4	71.3182	1.84281	0.459368	4.01161	6.03068e-05	0.00754004
ENSMUSG00000036875	Dna2	639.498	1.84148	0.458268	4.01835	5.86069e-05	0.00748196
ENSMUSG00000022887	Masp1	247.182	1.80621	0.407946	4.42758	9.52965e-06	0.00170898
ENSMUSG00000047959	Kcna3	247.441	1.76825	0.420436	4.20574	2.6023e-05	0.00405274
ENSMUSG00000029414	Kntc1	382.832	1.74345	0.4426	3.93911	8.1784e-05	0.00920205
ENSMUSG00000028874	Fgr	204.785	1.66308	0.422232	3.93879	8.18927e-05	0.00920205
ENSMUSG00000024590	Lmnb1	215.282	1.65109	0.409877	4.02825	5.61937e-05	0.00727999
ENSMUSG00000079293	Clec7a	646.475	1.60408	0.322566	4.97288	6.59652e-07	0.000209133
ENSMUSG00000095280	NA	100.377	1.56715	0.396611	3.95136	7.77082e-05	0.00898465
ENSMUSG00000037913	Tmem156	267.015	1.54774	0.37602	4.11611	3.85318e-05	0.00560732
ENSMUSG00000040829	Zmynd15	329.104	1.53106	0.387252	3.95365	7.69671e-05	0.00898465
ENSMUSG00000075015	NA	621.897	1.51206	0.262382	5.76285	8.27074e-09	5.43847e-06
ENSMUSG00000075014	NA	2718.03	1.49904	0.234039	6.40508	1.50294e-10	1.5696e-07
ENSMUSG00000019088	Dnase1l1	142.835	1.49266	0.377825	3.95067	7.79338e-05	0.00898465
ENSMUSG00000111067	NA	182.081	1.35621	0.336812	4.02661	5.65866e-05	0.00727999
ENSMUSG00000097971	NA	158059	1.35597	0.298652	4.54029	5.61756e-06	0.00113334
ENSMUSG00000098973	Mir6236	49450.4	1.23233	0.304244	4.05048	5.11138e-05	0.0069049
ENSMUSG00000058586	Serhl	242.76	1.21717	0.267554	4.54925	5.38386e-06	0.00112879
ENSMUSG00000069516	Lyz2	3972.75	1.20734	0.283185	4.26345	2.01298e-05	0.00324895
ENSMUSG00000025795	Rassf3	806.223	1.19197	0.255302	4.66885	3.02891e-06	0.000727476
ENSMUSG00000014158	Trpv4	251.435	1.11191	0.280285	3.96709	7.27566e-05	0.00866926
ENSMUSG00000104358	NA	964.209	1.10399	0.190492	5.79545	6.81394e-09	4.83899e-06
ENSMUSG00000000682	Cd52	1352.78	1.10235	0.214219	5.1459	2.66242e-07	0.000100571
ENSMUSG00000086324	NA	8673.85	1.0349	0.231652	4.46751	7.91362e-06	0.00149466
ENSMUSG00000064397	NA	894.31	1.03074	0.239149	4.31002	1.63243e-05	0.00276021
ENSMUSG00000032252	Glce	725.495	0.933417	0.209824	4.44857	8.64434e-06	0.00159866
ENSMUSG00000033880	Lgals3bp	8450.64	0.928205	0.233874	3.96882	7.22305e-05	0.00866473
ENSMUSG00000064339	NA	1.44288e+06	0.914334	0.226417	4.03827	5.38458e-05	0.00708133
ENSMUSG00000031838	Ifi30	3396.3	0.865647	0.182923	4.73231	2.21979e-06	0.000597124
ENSMUSG00000067274	Rplp0	1138.45	0.856033	0.193293	4.42868	9.48104e-06	0.00170898
ENSMUSG00000064368	ND6	2250.01	0.749988	0.1601	4.6845	2.80647e-06	0.0007118
ENSMUSG00000000957	Mmp14	1386.28	0.716466	0.157348	4.55337	5.27933e-06	0.00112879
ENSMUSG00000029500	Pgam5	482.723	0.707479	0.175469	4.03193	5.53216e-05	0.00722192
ENSMUSG00000035202	Lars2	47755.8	0.691701	0.128855	5.36804	7.9595e-08	3.71876e-05
ENSMUSG00000051343	Rab11fip5	1831.47	0.677133	0.16948	3.99536	6.4596e-05	0.00796415
ENSMUSG00000003429	Rps11	956.89	0.669619	0.162949	4.10939	3.96712e-05	0.00568002
ENSMUSG00000106106	NA	458432	0.62841	0.149678	4.1984	2.68804e-05	0.00414987
ENSMUSG00000031818	Cox4i1	1598.47	0.604419	0.128113	4.71785	2.3835e-06	0.000622303
ENSMUSG00000038518	Jarid2	2492.81	0.492503	0.0973685	5.05813	4.23383e-07	0.000150335
ENSMUSG00000063253	Scoc	4257.75	0.479671	0.119467	4.0151	5.94208e-05	0.00748196
ENSMUSG00000033004	Mycbp2	17254.1	-0.339611	0.0867564	-3.91453	9.05796e-05	0.00988309
ENSMUSG00000026425	Srgap2	42749.4	-0.380507	0.0906888	-4.19574	2.71979e-05	0.00416268
ENSMUSG00000027508	Pag1	43886.6	-0.407247	0.104098	-3.91214	9.14804e-05	0.00990331
ENSMUSG00000005534	Insr	6872.32	-0.411644	0.0896152	-4.59346	4.35953e-06	0.000979736
ENSMUSG00000037410	Tbc1d2b	2887.39	-0.537558	0.131103	-4.10027	4.12672e-05	0.00584421
ENSMUSG00000040663	Clcf1	3858.03	-0.557729	0.134225	-4.15517	3.25043e-05	0.00484942
ENSMUSG00000026482	Rgl1	2857.41	-0.60862	0.134163	-4.53643	5.72135e-06	0.00114131
ENSMUSG00000038517	Tbkbp1	1463.98	-0.6632	0.148895	-4.45416	8.42218e-06	0.00157397
ENSMUSG00000030583	Sipa1l3	2413.13	-0.679403	0.13507	-5.02999	4.90517e-07	0.000164314
ENSMUSG00000054792	Klhl18	2758.1	-0.68128	0.134489	-5.06568	4.06951e-07	0.000147449
ENSMUSG00000024150	Mcfd2	1799.05	-0.703805	0.145932	-4.82284	1.41531e-06	0.000411924
ENSMUSG00000021326	Trim27	1237.95	-0.709573	0.172626	-4.11048	3.94842e-05	0.00568002
ENSMUSG00000018377	Vezf1	2474.11	-0.718902	0.18299	-3.92864	8.54286e-05	0.00949068
ENSMUSG00000108655	NA	1523.23	-0.751743	0.165406	-4.54483	5.49806e-06	0.00112879
ENSMUSG00000039157	Fam102a	1009.79	-0.770591	0.189136	-4.07428	4.61572e-05	0.00635251
ENSMUSG00000023944	Hsp90ab1	9121.66	-0.776038	0.141952	-5.4669	4.57961e-08	2.25851e-05
ENSMUSG00000030695	Aldoa	2100.11	-0.800778	0.196235	-4.0807	4.49001e-05	0.00627682
ENSMUSG00000043384	Gprasp1	1727.53	-0.82444	0.15875	-5.19331	2.06585e-07	7.9733e-05
ENSMUSG00000075054	Yae1d1	1367.97	-0.95254	0.199722	-4.76934	1.84832e-06	0.000520875
ENSMUSG00000022550	Adck5	543.272	-1.06079	0.247168	-4.29178	1.77246e-05	0.00294095
ENSMUSG00000020717	Pecam1	1004.98	-1.10262	0.272453	-4.04702	5.18738e-05	0.00692457
ENSMUSG00000015316	Slamf1	323.606	-1.14153	0.286696	-3.98166	6.84357e-05	0.00826535
ENSMUSG00000053925	NA	203.745	-1.17245	0.29846	-3.92835	8.55306e-05	0.00949068
ENSMUSG00000078656	Vps25	117.739	-1.30556	0.326265	-4.00154	6.29314e-05	0.00781317
ENSMUSG00000032643	Fhl3	869.384	-1.32925	0.322338	-4.12376	3.72729e-05	0.00546896
ENSMUSG00000100320	NA	294.38	-1.57405	0.272622	-5.77376	7.75224e-09	5.29359e-06
ENSMUSG00000089798	1700028K03Rik	249.987	-1.6009	0.339675	-4.71304	2.44047e-06	0.000627944
ENSMUSG00000026203	Dnajb2	429.374	-1.69153	0.395238	-4.27977	1.87087e-05	0.00304729
ENSMUSG00000083687	NA	179.463	-1.8617	0.406469	-4.58019	4.64556e-06	0.00103096
ENSMUSG00000113094	NA	256.534	-1.97803	0.360025	-5.49416	3.92569e-08	2.11202e-05
ENSMUSG00000113454	NA	61.9217	-2.99859	0.659845	-4.54439	5.50952e-06	0.00112879
ENSMUSG00000069554	NA	18.0461	-6.00389	1.47491	-4.07069	4.68744e-05	0.0064016

## Sheet: MaleCSF1vsFemaleCSF1
Ensembl_ID	Gene_ID	baseMean	log2FoldChange	lfcSE	stat	pvalue	padj
ENSMUSG00000069049	Eif2s3y	756.737	9.84575	0.626813	15.7076	1.34098e-55	5.47321e-52
ENSMUSG00000068457	Uty	608.23	9.82394	0.712594	13.7862	3.08774e-43	1.00821e-39
ENSMUSG00000069045	Ddx3y	814.563	9.53754	0.556562	17.1365	7.92547e-66	4.31304e-62
ENSMUSG00000042265	Trem1	55.7463	8.51057	1.74027	4.89037	1.00649e-06	7.3756e-05
ENSMUSG00000056673	Kdm5d	1065.29	8.35334	0.413618	20.1958	1.06576e-90	8.69979e-87
ENSMUSG00000112006	NA	17.2062	7.76032	2.08003	3.73087	0.000190823	0.0047792
ENSMUSG00000002289	Angptl4	15.5115	7.61057	1.78097	4.27328	1.92618e-05	0.000812581
ENSMUSG00000101059	NA	29.3541	7.54396	1.57642	4.7855	1.70563e-06	0.000115067
ENSMUSG00000099809	NA	37.5475	7.09668	1.16906	6.07039	1.27599e-09	3.10923e-07
ENSMUSG00000035373	Ccl7	59.3165	6.88788	1.31989	5.21854	1.80338e-07	1.79525e-05
ENSMUSG00000026870	Cutal	24.1864	6.23441	1.53151	4.07075	4.68614e-05	0.0016039
ENSMUSG00000053338	Tarm1	54.2894	6.11841	1.1161	5.48197	4.20625e-08	5.40718e-06
ENSMUSG00000015312	Gadd45b	70.3676	5.95361	1.14068	5.21934	1.79562e-07	1.79525e-05
ENSMUSG00000026981	Il1rn	920.085	5.52619	1.06716	5.1784	2.23795e-07	2.13665e-05
ENSMUSG00000050370	Ch25h	588.542	5.40734	1.36694	3.9558	7.628e-05	0.0023312
ENSMUSG00000052850	Tas2r137	16.0891	5.36231	1.53932	3.48355	0.000494808	0.0098998
ENSMUSG00000097755	NA	82.9827	5.3122	1.45076	3.66167	0.000250575	0.00599838
ENSMUSG00000089842	NA	30.1248	5.26711	1.28581	4.09633	4.19745e-05	0.00148328
ENSMUSG00000024772	Ehd1	367.373	5.22973	0.728318	7.18056	6.94281e-13	3.80605e-10
ENSMUSG00000087795	NA	25.1962	4.94687	1.36296	3.62949	0.00028398	0.00665027
ENSMUSG00000020834	Dhrs13	24.0211	4.83304	1.21977	3.96227	7.42409e-05	0.0022869
ENSMUSG00000035109	Shc4	136.94	4.71396	0.846134	5.57117	2.53039e-08	3.65585e-06
ENSMUSG00000109149	NA	42.345	4.52587	1.16188	3.89531	9.8074e-05	0.00288497
ENSMUSG00000026193	Fn1	7352.39	4.52416	1.12294	4.02885	5.60508e-05	0.00182332
ENSMUSG00000002944	Cd36	198.314	4.43964	0.673892	6.58805	4.45631e-11	1.45507e-08
ENSMUSG00000035385	Ccl2	1438.26	4.32986	0.488113	8.87061	7.27486e-19	1.31966e-15
ENSMUSG00000076441	Ass1	27.2902	4.31193	1.19724	3.60157	0.000316303	0.00718215
ENSMUSG00000035352	Ccl12	8757.69	4.03188	0.472232	8.53791	1.36668e-17	2.23124e-14
ENSMUSG00000002068	Ccne1	186.179	4.00105	0.632533	6.32544	2.5252e-10	6.87106e-08
ENSMUSG00000064032	NA	34.6615	3.9374	1.02015	3.85964	0.000113552	0.00316357
ENSMUSG00000022074	Tnfrsf10b	59.0399	3.87801	0.506263	7.66007	1.85826e-14	2.02253e-11
ENSMUSG00000029304	Spp1	1857.22	3.85187	0.536506	7.17956	6.99384e-13	3.80605e-10
ENSMUSG00000032850	Rnft2	39.2166	3.83384	0.76736	4.99614	5.84879e-07	4.65792e-05
ENSMUSG00000055737	Ghr	60.0317	3.53113	0.923769	3.82253	0.000132091	0.00358822
ENSMUSG00000079053	NA	81.2037	3.40309	0.707084	4.81285	1.48792e-06	0.000101639
ENSMUSG00000108520	NA	28.8399	3.38501	0.836725	4.04554	5.2202e-05	0.00173222
ENSMUSG00000028931	Kcnab2	129.506	3.34715	0.66919	5.00179	5.67992e-07	4.568e-05
ENSMUSG00000117686	NA	76.6954	3.26039	0.837986	3.89075	9.9934e-05	0.00291343
ENSMUSG00000025044	Msr1	1963.76	3.21228	0.862734	3.72337	0.000196581	0.00487747
ENSMUSG00000022094	Slc39a14	7561.47	3.17453	0.322346	9.8482	6.9784e-23	1.62756e-19
ENSMUSG00000073274	NA	389.02	3.16094	0.628689	5.02783	4.96063e-07	4.06971e-05
ENSMUSG00000064179	Tnnt1	106.471	3.14985	0.905248	3.47955	0.000502263	0.00996644
ENSMUSG00000058589	Anks1b	24.6113	3.14792	0.820976	3.83437	0.000125888	0.00343688
ENSMUSG00000023830	Igf2r	296.04	3.11548	0.559719	5.56615	2.60428e-08	3.7296e-06
ENSMUSG00000015568	Lpl	4595.08	3.09421	0.716505	4.31847	1.57111e-05	0.000697084
ENSMUSG00000026558	Uck2	224.265	2.8801	0.605641	4.75546	1.97998e-06	0.000127264
ENSMUSG00000060591	Ifitm2	75.3585	2.86789	0.69855	4.10549	4.03454e-05	0.00144131
ENSMUSG00000045502	Hcar2	2153.47	2.82444	0.356486	7.92299	2.31863e-15	2.91185e-12
ENSMUSG00000038244	Mical2	126.918	2.8048	0.612871	4.5765	4.72828e-06	0.000264363
ENSMUSG00000106822	NA	253.584	2.75703	0.774348	3.56046	0.000370211	0.00800539
ENSMUSG00000024401	Tnf	843.286	2.71665	0.470259	5.77692	7.60821e-09	1.36496e-06
ENSMUSG00000029591	Ung	165.328	2.70911	0.543319	4.98623	6.1569e-07	4.83258e-05
ENSMUSG00000004709	Cd244a	2149.13	2.63774	0.510251	5.1695	2.34716e-07	2.21501e-05
ENSMUSG00000109236	NA	168.356	2.557	0.653675	3.91172	9.16395e-05	0.00271526
ENSMUSG00000025001	Hells	470.82	2.55586	0.338202	7.5572	4.11846e-14	3.95518e-11
ENSMUSG00000103676	NA	35.7901	2.53156	0.593432	4.26596	1.9904e-05	0.000826852
ENSMUSG00000001228	Uhrf1	593.23	2.52791	0.489256	5.16685	2.38072e-07	2.23377e-05
ENSMUSG00000030103	Bhlhe40	254.38	2.50121	0.702382	3.56105	0.000369379	0.00800539
ENSMUSG00000007080	Pole	661.342	2.48126	0.486755	5.09756	3.44055e-07	3.01991e-05
ENSMUSG00000090223	Pcp4	48.9126	2.46552	0.573805	4.29679	1.73291e-05	0.000756458
ENSMUSG00000028459	Cd72	2542.61	2.43818	0.513706	4.74626	2.07212e-06	0.000131122
ENSMUSG00000050335	Lgals3	125.125	2.42854	0.623673	3.89394	9.8631e-05	0.00288575
ENSMUSG00000031697	Orc6	425.499	2.4263	0.40805	5.94609	2.7463e-09	5.89949e-07
ENSMUSG00000037280	Galnt6	355.473	2.42628	0.616914	3.93293	8.39172e-05	0.00251844
ENSMUSG00000030830	Itgal	229.188	2.39628	0.638288	3.75422	0.000173879	0.00445644
ENSMUSG00000039959	Hip1	732.01	2.36925	0.671587	3.52783	0.000418975	0.00875084
ENSMUSG00000002870	Mcm2	721.16	2.34826	0.332984	7.05215	1.76172e-12	8.71571e-10
ENSMUSG00000099655	NA	68.3299	2.34	0.630837	3.70936	0.000207784	0.0051243
ENSMUSG00000022150	Dab2	2775.54	2.33755	0.284414	8.21883	2.05503e-16	3.05004e-13
ENSMUSG00000115319	NA	37.1842	2.32432	0.6677	3.48109	0.000499377	0.00996644
ENSMUSG00000022528	Hes1	50.0177	2.31314	0.655315	3.52981	0.000415853	0.00871529
ENSMUSG00000050357	Carmil2	73.0386	2.31106	0.57165	4.0428	5.28172e-05	0.00174416
ENSMUSG00000023087	Noct	170.91	2.29593	0.592534	3.87477	0.000106725	0.00303025
ENSMUSG00000026355	Mcm6	792.823	2.27523	0.384793	5.91288	3.36181e-09	7.03652e-07
ENSMUSG00000022246	Rai14	1575.19	2.26082	0.319963	7.06586	1.59621e-12	8.14369e-10
ENSMUSG00000025473	Adam8	342.659	2.23683	0.441348	5.06818	4.01643e-07	3.45117e-05
ENSMUSG00000024610	Cd74	1526.72	2.23161	0.546848	4.08086	4.48691e-05	0.00155527
ENSMUSG00000037474	Dtl	744.746	2.19776	0.597824	3.67627	0.00023667	0.00573274
ENSMUSG00000001473	Tubb6	597.03	2.13979	0.447751	4.77898	1.7619e-06	0.000117888
ENSMUSG00000039994	Timeless	315.539	2.1281	0.356767	5.96495	2.44705e-09	5.32674e-07
ENSMUSG00000065159	NA	73.1383	2.12611	0.506153	4.20052	2.66297e-05	0.00103761
ENSMUSG00000022098	Bmp1	327.689	2.12132	0.400592	5.29546	1.18719e-07	1.29213e-05
ENSMUSG00000056394	Lig1	708.2	2.11542	0.383407	5.51743	3.43985e-08	4.56577e-06
ENSMUSG00000058317	Ube2e2	41.1928	2.11491	0.593576	3.563	0.000366637	0.00797033
ENSMUSG00000053113	Socs3	1739.91	2.11413	0.462676	4.56935	4.89233e-06	0.000272003
ENSMUSG00000005413	Hmox1	1518.84	2.10955	0.427669	4.93267	8.11142e-07	6.0469e-05
ENSMUSG00000064349	NA	75.1595	2.10901	0.474924	4.44073	8.96546e-06	0.00043955
ENSMUSG00000099757	NA	778.562	2.08839	0.35812	5.83152	5.49248e-09	1.05987e-06
ENSMUSG00000032220	Myo1e	3135.45	2.07255	0.279009	7.42827	1.10027e-13	8.16499e-11
ENSMUSG00000037278	Tmem97	173.244	2.06432	0.448667	4.601	4.20459e-06	0.000237523
ENSMUSG00000031562	Dctd	281.953	2.06276	0.411489	5.01292	5.36097e-07	4.35439e-05
ENSMUSG00000105987	AI506816	3749.98	1.99645	0.270207	7.3886	1.48383e-13	1.00938e-10
ENSMUSG00000034329	Brip1	464.476	1.9951	0.470687	4.23871	2.24808e-05	0.000908289
ENSMUSG00000020841	Cpd	13261.1	1.99244	0.34383	5.79484	6.83844e-09	1.26869e-06
ENSMUSG00000068129	Cst7	428.817	1.97595	0.360665	5.47862	4.28653e-08	5.46734e-06
ENSMUSG00000033356	Pus7l	244.895	1.96838	0.43173	4.55928	5.13294e-06	0.000282156
ENSMUSG00000039552	Rsph4a	185.788	1.95973	0.546294	3.58732	0.00033409	0.0074615
ENSMUSG00000039745	Htatip2	121.704	1.94293	0.539681	3.60015	0.000318033	0.00719169
ENSMUSG00000032902	Slc16a1	619.31	1.93557	0.290293	6.66764	2.59944e-11	9.02945e-09
ENSMUSG00000005410	Mcm5	413.806	1.91672	0.530047	3.61613	0.00029904	0.006925
ENSMUSG00000062075	Lmnb2	372.271	1.9098	0.462715	4.12737	3.66936e-05	0.00133719
ENSMUSG00000064340	NA	116.769	1.90918	0.3526	5.41457	6.14372e-08	7.42981e-06
ENSMUSG00000053175	Bcl3	546.569	1.88244	0.42363	4.44358	8.84725e-06	0.000436375
ENSMUSG00000117869	Snhg4	948.285	1.88171	0.45936	4.09637	4.19676e-05	0.00148328
ENSMUSG00000087107	AI662270	89.5916	1.8754	0.456343	4.10964	3.96285e-05	0.00142192
ENSMUSG00000047945	Marcksl1	272.301	1.87126	0.441639	4.23708	2.26446e-05	0.000908345
ENSMUSG00000034926	Dhcr24	159.027	1.87125	0.326053	5.7391	9.5179e-09	1.61864e-06
ENSMUSG00000015850	Adamtsl4	322.418	1.8622	0.437501	4.25645	2.077e-05	0.000854134
ENSMUSG00000024640	Psat1	1965.59	1.85807	0.24434	7.60444	2.8613e-14	2.9196e-11
ENSMUSG00000070639	Lrrc8b	457.664	1.85404	0.383321	4.83678	1.31961e-06	9.24633e-05
ENSMUSG00000047798	Cd300lf	1108.71	1.84778	0.437601	4.22253	2.41577e-05	0.000964301
ENSMUSG00000020974	Pole2	181.569	1.83262	0.402427	4.55393	5.26527e-06	0.000287494
ENSMUSG00000024660	Incenp	1257.37	1.81927	0.511276	3.55828	0.000373289	0.00805061
ENSMUSG00000040767	Snrnp25	116.931	1.81457	0.470113	3.85987	0.000113449	0.00316357
ENSMUSG00000106115	NA	372.665	1.80755	0.518695	3.48481	0.000492495	0.00987772
ENSMUSG00000022360	Atad2	2911.69	1.80231	0.416626	4.32597	1.51864e-05	0.000684897
ENSMUSG00000032218	Ccnb2	1181.84	1.75785	0.486873	3.61049	0.000305616	0.00703587
ENSMUSG00000026728	Vim	687.433	1.75722	0.381469	4.60644	4.0962e-06	0.000233012
ENSMUSG00000035493	Tgfbi	2918.34	1.75669	0.186345	9.42711	4.21534e-21	8.60246e-18
ENSMUSG00000022797	Tfrc	604.477	1.75234	0.337916	5.18574	2.15158e-07	2.0785e-05
ENSMUSG00000033294	Noc4l	383.092	1.71198	0.381912	4.48266	7.37182e-06	0.000378708
ENSMUSG00000022673	Mcm4	574.81	1.70113	0.311398	5.46288	4.68478e-08	5.92897e-06
ENSMUSG00000059089	Fcgr4	1326.98	1.6967	0.400128	4.24039	2.23135e-05	0.000904944
ENSMUSG00000035049	Rrp12	356.084	1.67782	0.346004	4.84913	1.24002e-06	8.8404e-05
ENSMUSG00000049130	C5ar1	10903.5	1.67587	0.311503	5.37995	7.45057e-08	8.68842e-06
ENSMUSG00000032279	Idh3a	553.499	1.66755	0.344076	4.84647	1.2568e-06	8.92108e-05
ENSMUSG00000021886	Gpr65	1194.62	1.66715	0.260687	6.3952	1.60336e-10	4.59235e-08
ENSMUSG00000028633	Ctps	236	1.66241	0.427904	3.885	0.00010233	0.00294493
ENSMUSG00000028614	Ndc1	840.112	1.65881	0.371534	4.46475	8.0162e-06	0.000403927
ENSMUSG00000018983	E2f2	1277.32	1.65161	0.305641	5.40376	6.52574e-08	7.77659e-06
ENSMUSG00000037572	Wdhd1	691.586	1.64869	0.441957	3.73043	0.000191156	0.0047792
ENSMUSG00000079293	Clec7a	2267.26	1.63666	0.43893	3.72875	0.000192436	0.00480383
ENSMUSG00000057561	Eif1a	1506.27	1.63591	0.289311	5.65452	1.56284e-08	2.42525e-06
ENSMUSG00000020077	Srgn	5007.27	1.63455	0.24999	6.53847	6.21511e-11	1.91449e-08
ENSMUSG00000038028	Tigar	363.618	1.63357	0.431732	3.78376	0.000154478	0.00408092
ENSMUSG00000074813	NA	671.824	1.63143	0.447473	3.64588	0.000266481	0.00629605
ENSMUSG00000006442	Srm	826.128	1.63036	0.379932	4.29119	1.77721e-05	0.000773727
ENSMUSG00000028312	Smc2	1656.85	1.63005	0.467279	3.48839	0.000485934	0.00975813
ENSMUSG00000041313	Slc7a1	2347.5	1.62962	0.411994	3.95544	7.63929e-05	0.0023312
ENSMUSG00000022893	Adamts1	1234.6	1.62678	0.35813	4.54243	5.56086e-06	0.00029864
ENSMUSG00000020089	Ppa1	180.565	1.62234	0.352813	4.59829	4.25981e-06	0.000238989
ENSMUSG00000101188	NA	67.9261	1.61129	0.371322	4.33934	1.42911e-05	0.000655384
ENSMUSG00000011179	Odc1	225.222	1.61042	0.323623	4.97623	6.48357e-07	4.99296e-05
ENSMUSG00000021270	Hsp90aa1	624.212	1.58705	0.217524	7.29598	2.96486e-13	1.72873e-10
ENSMUSG00000028333	Anp32b	2013.23	1.57432	0.268664	5.85982	4.63378e-09	9.11459e-07
ENSMUSG00000025980	Hspd1	1265.24	1.57202	0.272737	5.76386	8.22135e-09	1.44324e-06
ENSMUSG00000062070	Pgk1	163.904	1.5623	0.391113	3.99449	6.48342e-05	0.0020714
ENSMUSG00000037601	Nme1	360.77	1.54772	0.248779	6.22125	4.93214e-10	1.27813e-07
ENSMUSG00000001227	Sema6b	387.441	1.54241	0.324774	4.74917	2.04255e-06	0.000130062
ENSMUSG00000042354	Gnl3	1480.55	1.53942	0.432008	3.56341	0.000366065	0.0079685
ENSMUSG00000038047	Haus6	1006.9	1.53114	0.398196	3.8452	0.000120456	0.0032996
ENSMUSG00000051339	2900026A02Rik	379.054	1.53077	0.34828	4.39524	1.10652e-05	0.000526679
ENSMUSG00000020075	Ddx21	2546.76	1.52928	0.321583	4.75548	1.97978e-06	0.000127264
ENSMUSG00000027398	Il1b	279.319	1.52663	0.433025	3.5255	0.000422692	0.00879091
ENSMUSG00000012405	Rpl15	488.95	1.52451	0.241966	6.30051	2.96674e-10	7.8121e-08
ENSMUSG00000021811	Dnajc9	370.479	1.51849	0.415242	3.65687	0.000255309	0.00610274
ENSMUSG00000029413	Naaa	2478	1.51843	0.244306	6.21527	5.1236e-10	1.307e-07
ENSMUSG00000063234	Gpr84	5160.51	1.50568	0.332501	4.52836	5.94422e-06	0.000315082
ENSMUSG00000032322	Pstpip1	245.578	1.50115	0.412912	3.63552	0.000277425	0.00651689
ENSMUSG00000030254	Rad18	418.7	1.50027	0.425978	3.52194	0.000428403	0.00886453
ENSMUSG00000023944	Hsp90ab1	12997.2	1.49985	0.143332	10.4642	1.26147e-25	3.43247e-22
ENSMUSG00000009575	Cbx5	3875.26	1.49556	0.261103	5.72787	1.01698e-08	1.71167e-06
ENSMUSG00000027342	Pcna	766.897	1.49496	0.293083	5.10078	3.3825e-07	3.00123e-05
ENSMUSG00000038418	Egr1	1096.78	1.49451	0.295924	5.05031	4.41104e-07	3.65557e-05
ENSMUSG00000007050	Lsm2	1154.01	1.49115	0.319927	4.66089	3.14841e-06	0.000186235
ENSMUSG00000038759	Nup205	1730.46	1.48654	0.241729	6.14961	7.76725e-10	1.92133e-07
ENSMUSG00000025153	Fasn	1765.51	1.47999	0.318232	4.65065	3.30893e-06	0.000195024
ENSMUSG00000002308	Cd320	165.006	1.47722	0.383186	3.85511	0.000115679	0.00320642
ENSMUSG00000105864	NA	519.02	1.45856	0.355133	4.10709	4.0067e-05	0.00143451
ENSMUSG00000055760	Gemin6	102.923	1.45276	0.411676	3.52889	0.000417308	0.00873458
ENSMUSG00000026864	Hspa5	19903.9	1.44915	0.205951	7.03638	1.97297e-12	9.47375e-10
ENSMUSG00000025403	Shmt2	1659.21	1.44649	0.215862	6.70099	2.07016e-11	7.85988e-09
ENSMUSG00000030189	Ybx3	900.249	1.43792	0.260417	5.52158	3.35962e-08	4.49583e-06
ENSMUSG00000025236	Adpgk	1097.2	1.43452	0.31958	4.48877	7.16372e-06	0.000371247
ENSMUSG00000018171	Vmp1	3724.3	1.39992	0.276348	5.06578	4.0673e-07	3.47659e-05
ENSMUSG00000024679	Ms4a6d	2858.64	1.39984	0.247052	5.66619	1.46006e-08	2.29201e-06
ENSMUSG00000098222	NA	161.798	1.39734	0.292814	4.77212	1.82301e-06	0.00011905
ENSMUSG00000029430	Ran	1020.23	1.39548	0.264074	5.28443	1.26096e-07	1.33678e-05
ENSMUSG00000045752	Tssc4	500.068	1.39469	0.261236	5.33881	9.3558e-08	1.06071e-05
ENSMUSG00000030835	Nomo1	1582.35	1.39089	0.255652	5.44056	5.31145e-08	6.67036e-06
ENSMUSG00000039942	Ptger4	732.736	1.38513	0.246929	5.60941	2.03017e-08	3.01314e-06
ENSMUSG00000046245	Pilra	1862.47	1.38295	0.272318	5.07843	3.8057e-07	3.2874e-05
ENSMUSG00000031799	Tpm4	2006.88	1.37412	0.228147	6.02296	1.71255e-09	3.99416e-07
ENSMUSG00000064341	ND1	34095.1	1.37308	0.229703	5.97761	2.26431e-09	4.99555e-07
ENSMUSG00000026271	Gpr35	3006.85	1.37012	0.386514	3.5448	0.000392909	0.0083742
ENSMUSG00000005054	Cstb	919.664	1.36169	0.314906	4.3241	1.53153e-05	0.000687641
ENSMUSG00000002881	Nab1	793.473	1.35908	0.335521	4.05065	5.10755e-05	0.00170873
ENSMUSG00000036752	Tubb4b	552.254	1.34955	0.358753	3.76178	0.000168708	0.00437195
ENSMUSG00000031657	Heatr3	825.564	1.34897	0.282225	4.77978	1.75487e-06	0.000117888
ENSMUSG00000028367	Txn1	544.244	1.34502	0.385369	3.4902	0.000482663	0.00972834
ENSMUSG00000037020	Wdr62	595.218	1.33746	0.362591	3.68862	0.000225475	0.00548601
ENSMUSG00000021360	Gcnt2	3223.7	1.33011	0.328063	4.05445	5.02532e-05	0.00168467
ENSMUSG00000004929	Thop1	198.504	1.32879	0.318427	4.17298	3.00641e-05	0.00114146
ENSMUSG00000039126	Prune2	6854.3	1.32717	0.249876	5.3113	1.08844e-07	1.20067e-05
ENSMUSG00000070407	Hs3st3b1	895.225	1.32329	0.349788	3.78311	0.000154882	0.00408499
ENSMUSG00000036078	Sigmar1	1279.5	1.31442	0.314571	4.17847	2.93482e-05	0.00111948
ENSMUSG00000026020	Nop58	1570.84	1.31442	0.267579	4.91228	9.00248e-07	6.65043e-05
ENSMUSG00000000682	Cd52	3524.83	1.31161	0.302493	4.33602	1.45084e-05	0.000661632
ENSMUSG00000079419	Ms4a6c	445.87	1.3025	0.350493	3.7162	0.000202245	0.0050028
ENSMUSG00000001098	Kctd10	292.434	1.30124	0.334866	3.88584	0.000101978	0.0029415
ENSMUSG00000022346	Myc	3057.12	1.30044	0.33102	3.92858	8.54474e-05	0.0025503
ENSMUSG00000004891	Nes	772.472	1.29439	0.300869	4.30219	1.69122e-05	0.000748261
ENSMUSG00000041355	Ssr2	1511.89	1.29068	0.213128	6.0559	1.39637e-09	3.30394e-07
ENSMUSG00000091337	Eid1	1652.89	1.28413	0.27641	4.64573	3.38882e-06	0.000199014
ENSMUSG00000015176	Nolc1	890.498	1.28257	0.323487	3.96484	7.34445e-05	0.00227571
ENSMUSG00000032555	Topbp1	2055.31	1.28146	0.314205	4.07842	4.53421e-05	0.00156502
ENSMUSG00000015656	Hspa8	3049.95	1.27543	0.224052	5.69254	1.2516e-08	2.0033e-06
ENSMUSG00000022391	Rangap1	1124.52	1.27132	0.298316	4.26166	2.0291e-05	0.000838659
ENSMUSG00000108414	Snhg1	1098.28	1.2643	0.311538	4.05826	4.94401e-05	0.00166082
ENSMUSG00000064345	ND2	8888.68	1.26379	0.236866	5.33544	9.53115e-08	1.07314e-05
ENSMUSG00000005732	Ranbp1	465.257	1.25919	0.219906	5.72605	1.02796e-08	1.7125e-06
ENSMUSG00000057191	AB124611	542.644	1.24976	0.252425	4.95103	7.38236e-07	5.60578e-05
ENSMUSG00000024732	Ccdc86	888.267	1.24405	0.336834	3.69336	0.000221307	0.00540068
ENSMUSG00000031467	Agpat5	985.732	1.23987	0.261812	4.73574	2.1826e-06	0.000137051
ENSMUSG00000044934	Zfp367	496.25	1.23209	0.317458	3.88111	0.000103979	0.00297385
ENSMUSG00000057315	Arhgap24	1625.29	1.22898	0.337964	3.63642	0.00027645	0.00650334
ENSMUSG00000018446	C1qbp	1234.29	1.22637	0.290512	4.22141	2.4278e-05	0.000966737
ENSMUSG00000029657	Hsph1	1199.25	1.22275	0.326652	3.74327	0.000181641	0.00460104
ENSMUSG00000063229	Ldha	2757.19	1.21959	0.209166	5.83074	5.51814e-09	1.05987e-06
ENSMUSG00000026245	Farsb	1614.62	1.21882	0.176213	6.91674	4.62164e-12	1.93469e-09
ENSMUSG00000031246	Sh3bgrl	301.795	1.21683	0.337054	3.61018	0.000305982	0.00703587
ENSMUSG00000037242	Clic4	1226.23	1.21364	0.285266	4.2544	2.09612e-05	0.000859832
ENSMUSG00000071068	Treml2	1157.1	1.19919	0.340554	3.52128	0.000429461	0.00886498
ENSMUSG00000007617	Homer1	532.347	1.19878	0.28707	4.17592	2.96781e-05	0.00112943
ENSMUSG00000049299	Trappc1	1053.19	1.19336	0.178759	6.6758	2.45888e-11	8.72687e-09
ENSMUSG00000061477	Rps7	545.563	1.19329	0.302486	3.94494	7.98216e-05	0.00241327
ENSMUSG00000027285	Haus2	548.726	1.18962	0.305478	3.8943	9.8484e-05	0.00288575
ENSMUSG00000023004	Tuba1b	1567.98	1.18335	0.224226	5.27747	1.30978e-07	1.37958e-05
ENSMUSG00000057666	Gapdh	1636.96	1.17796	0.16904	6.96852	3.20289e-12	1.49401e-09
ENSMUSG00000001542	Ell2	2476.68	1.17786	0.244119	4.82496	1.40032e-06	9.6871e-05
ENSMUSG00000035376	Hacd2	1733.71	1.17739	0.210755	5.58654	2.31635e-08	3.37649e-06
ENSMUSG00000028926	Cdk14	2348.55	1.17639	0.202679	5.80422	6.46672e-09	1.21351e-06
ENSMUSG00000018920	Cxcl16	2216.91	1.17263	0.328307	3.57174	0.000354617	0.00781306
ENSMUSG00000027968	Larp7	452.649	1.16862	0.273569	4.27177	1.93926e-05	0.000815989
ENSMUSG00000113349	NA	100.923	1.16389	0.331086	3.51536	0.000439151	0.00900701
ENSMUSG00000021256	Vash1	590.281	1.16247	0.310164	3.74793	0.0001783	0.00454832
ENSMUSG00000025364	Pa2g4	2560.97	1.16246	0.173862	6.68609	2.29211e-11	8.50476e-09
ENSMUSG00000033720	Sfxn5	470.829	1.1602	0.326325	3.55534	0.000377492	0.0081198
ENSMUSG00000032115	Hyou1	4863.34	1.15879	0.171725	6.74796	1.49935e-11	5.82818e-09
ENSMUSG00000026234	Ncl	7230.7	1.15111	0.200393	5.74429	9.23072e-09	1.58632e-06
ENSMUSG00000069020	Urm1	382.242	1.14944	0.294299	3.90569	9.3958e-05	0.00276888
ENSMUSG00000025289	Prdx4	904.831	1.14913	0.196064	5.86098	4.60133e-09	9.11459e-07
ENSMUSG00000032294	Pkm	2870.07	1.14857	0.211484	5.43102	5.60332e-08	6.87818e-06
ENSMUSG00000064351	COX1	73133.6	1.14545	0.266338	4.30072	1.70242e-05	0.000751182
ENSMUSG00000024222	Fkbp5	2732.48	1.14396	0.208129	5.49642	3.87587e-08	5.06219e-06
ENSMUSG00000107136	NA	670.24	1.13994	0.292875	3.89225	9.93171e-05	0.00290063
ENSMUSG00000054843	Atrnl1	728.603	1.13977	0.2934	3.8847	0.000102457	0.00294493
ENSMUSG00000000555	Itga5	2032.77	1.13657	0.253556	4.48252	7.37652e-06	0.000378708
ENSMUSG00000022351	Sqle	435.711	1.13485	0.27874	4.07135	4.67409e-05	0.00160313
ENSMUSG00000033166	Dis3	1081.98	1.13138	0.252514	4.48045	7.44845e-06	0.000381202
ENSMUSG00000064370	CYTB	55704.8	1.1299	0.239443	4.71888	2.37142e-06	0.000147209
ENSMUSG00000078812	Eif5a	3207.84	1.12931	0.186469	6.05629	1.393e-09	3.30394e-07
ENSMUSG00000023272	Creld2	865.46	1.1278	0.250494	4.50229	6.72245e-06	0.000350641
ENSMUSG00000031198	Fundc2	503.662	1.12255	0.299939	3.7426	0.000182124	0.00460273
ENSMUSG00000015759	Cnih1	626.254	1.11909	0.313452	3.57023	0.000356672	0.00783719
ENSMUSG00000022769	Sdf2l1	2439.09	1.11522	0.281168	3.96638	7.29737e-05	0.00226927
ENSMUSG00000054079	Utp18	412.066	1.11061	0.308463	3.60048	0.000317634	0.00719169
ENSMUSG00000036285	Noa1	754.001	1.10581	0.305529	3.61934	0.000295356	0.00686893
ENSMUSG00000033161	Atp1a1	11725	1.10441	0.147306	7.49739	6.51013e-14	5.53838e-11
ENSMUSG00000031328	Flna	5503.37	1.10247	0.163021	6.76274	1.35406e-11	5.39181e-09
ENSMUSG00000020361	Hspa4	4878.01	1.09962	0.146429	7.50956	5.93262e-14	5.38089e-11
ENSMUSG00000027242	Wdr76	440.953	1.09838	0.302905	3.62614	0.000287687	0.00671929
ENSMUSG00000064337	NA	876004	1.09734	0.284708	3.85428	0.000116073	0.00321188
ENSMUSG00000020706	Ftsj3	1023.66	1.09731	0.246371	4.45388	8.43319e-06	0.000422332
ENSMUSG00000018677	Slc25a39	591.963	1.09414	0.240783	4.54409	5.51738e-06	0.000298268
ENSMUSG00000056201	Cfl1	6802.26	1.08828	0.231887	4.69312	2.69065e-06	0.000163909
ENSMUSG00000010609	Psen2	581.753	1.08324	0.287184	3.77193	0.000161989	0.00424312
ENSMUSG00000035941	Ibtk	1174.63	1.08144	0.222567	4.85894	1.18013e-06	8.48758e-05
ENSMUSG00000025161	Slc16a3	1037.73	1.07655	0.182747	5.89096	3.83958e-09	7.83562e-07
ENSMUSG00000001467	Cyp51	746.802	1.07329	0.229644	4.67369	2.95835e-06	0.000177567
ENSMUSG00000025538	Sumf2	607.664	1.07081	0.211641	5.05958	4.20175e-07	3.51783e-05
ENSMUSG00000015501	Hivep2	1316.09	1.06944	0.249479	4.28668	1.81361e-05	0.000785385
ENSMUSG00000001642	Akr1b3	780.136	1.06533	0.283508	3.75768	0.000171498	0.00441621
ENSMUSG00000064363	ND4	22196.3	1.06495	0.22	4.84067	1.29405e-06	9.14571e-05
ENSMUSG00000029447	Cct6a	3423.57	1.06427	0.210319	5.0603	4.18604e-07	3.51783e-05
ENSMUSG00000039067	Psmd7	1381.89	1.05945	0.290462	3.64745	0.000264854	0.00626668
ENSMUSG00000028521	Slc35d1	596.35	1.05703	0.241785	4.37176	1.2325e-05	0.000579878
ENSMUSG00000057113	Npm1	1870.95	1.05618	0.159392	6.62631	3.44178e-11	1.17064e-08
ENSMUSG00000064367	ND5	30290	1.05112	0.255601	4.11237	3.91626e-05	0.0014083
ENSMUSG00000037070	Rbmxl1	141.885	1.04993	0.291321	3.60402	0.000313333	0.00713454
ENSMUSG00000003814	Calr	15511.8	1.04929	0.223668	4.69128	2.71503e-06	0.000164779
ENSMUSG00000032575	Manf	1559.38	1.0475	0.201861	5.18921	2.11192e-07	2.05743e-05
ENSMUSG00000083563	NA	305.044	1.04632	0.275113	3.80324	0.000142818	0.00382238
ENSMUSG00000001175	Calm1	9499.67	1.04451	0.129853	8.04378	8.71104e-16	1.18514e-12
ENSMUSG00000058355	Abce1	2706.78	1.04425	0.291533	3.58193	0.000341069	0.0075708
ENSMUSG00000028639	Ybx1	3016.48	1.04417	0.182416	5.72414	1.03961e-08	1.71442e-06
ENSMUSG00000036678	Aaas	670.982	1.04207	0.209598	4.97175	6.63512e-07	5.08568e-05
ENSMUSG00000027405	Nop56	1472.74	1.03891	0.294527	3.52738	0.000419693	0.00875084
ENSMUSG00000030748	Il4ra	9230.66	1.03701	0.290573	3.56885	0.000358547	0.00786778
ENSMUSG00000012609	Ttll5	1051.67	1.03358	0.238469	4.33421	1.46287e-05	0.000664656
ENSMUSG00000025507	Pidd1	617.86	1.03217	0.24131	4.27735	1.89135e-05	0.000802031
ENSMUSG00000001525	Tubb5	12660.8	1.02907	0.286769	3.5885	0.000332591	0.0074382
ENSMUSG00000028426	Rad23b	2174.6	1.02586	0.229357	4.47277	7.72127e-06	0.000391483
ENSMUSG00000030662	Ipo5	2804.38	1.0256	0.216903	4.72835	2.2635e-06	0.000141045
ENSMUSG00000028268	Gbp3	451.919	1.02309	0.286043	3.57669	0.000347971	0.00768738
ENSMUSG00000035521	Gnptg	797.159	1.02142	0.225004	4.53955	5.63748e-06	0.000301762
ENSMUSG00000035704	Alg8	4878.36	1.02102	0.240273	4.24942	2.14322e-05	0.000872574
ENSMUSG00000018042	Cyb5r3	1547.03	1.01962	0.235271	4.33379	1.46561e-05	0.000664656
ENSMUSG00000040528	Milr1	2845.19	1.01779	0.277533	3.66729	0.000245135	0.00589407
ENSMUSG00000105374	NA	1425.21	1.01617	0.196045	5.18335	2.17935e-07	2.09295e-05
ENSMUSG00000049327	Kmt5a	1425.22	1.01602	0.232719	4.36584	1.26633e-05	0.000594084
ENSMUSG00000076432	Ywhaq	439.868	1.0134	0.262662	3.85819	0.000114228	0.00317698
ENSMUSG00000027995	Tlr2	5553.81	1.01052	0.231894	4.35768	1.3145e-05	0.000613159
ENSMUSG00000006304	Arpc2	9244.41	1.00757	0.137152	7.34637	2.03664e-13	1.27885e-10
ENSMUSG00000053332	Gas5	6385.52	1.00634	0.283538	3.54923	0.000386365	0.00826709
ENSMUSG00000029171	Pgm1	583.07	1.00469	0.222026	4.52512	6.03622e-06	0.000318923
ENSMUSG00000025742	Prps2	1453.5	1.00085	0.227163	4.40586	1.05363e-05	0.000507423
ENSMUSG00000020048	Hsp90b1	37398.6	0.997781	0.241202	4.1367	3.52329e-05	0.00129845
ENSMUSG00000032349	Elovl5	1623.2	0.99721	0.246619	4.04353	5.26535e-05	0.00174365
ENSMUSG00000025353	Ormdl2	531.26	0.994537	0.239043	4.1605	3.17554e-05	0.00118908
ENSMUSG00000053289	Ddx10	776.219	0.992986	0.225744	4.39873	1.08887e-05	0.000519792
ENSMUSG00000025130	P4hb	7485.42	0.990445	0.14831	6.67821	2.41872e-11	8.72687e-09
ENSMUSG00000029467	Atp2a2	10997.9	0.990132	0.154253	6.41888	1.37282e-10	4.00225e-08
ENSMUSG00000006301	Tmbim1	3155.61	0.98495	0.248532	3.96307	7.39913e-05	0.00228352
ENSMUSG00000027315	Spint1	7397.53	0.981746	0.252848	3.88276	0.000103279	0.00296333
ENSMUSG00000030695	Aldoa	2249.75	0.979847	0.226898	4.31845	1.57128e-05	0.000697084
ENSMUSG00000020250	Txnrd1	1045.55	0.977675	0.237127	4.123	3.73964e-05	0.00135976
ENSMUSG00000031976	Urb2	642.757	0.971453	0.21645	4.48811	7.18572e-06	0.000371247
ENSMUSG00000037905	Bri3bp	997.888	0.971432	0.152205	6.38238	1.74358e-10	4.90788e-08
ENSMUSG00000030357	Fkbp4	1407.85	0.970199	0.260302	3.72721	0.00019361	0.00482577
ENSMUSG00000025351	Cd63	2772.87	0.969423	0.272888	3.55245	0.000381659	0.00818786
ENSMUSG00000027642	Rpn2	6990.97	0.968651	0.161937	5.98163	2.20911e-09	4.96808e-07
ENSMUSG00000071072	Ptges3	581.176	0.968468	0.265387	3.64926	0.000262997	0.00624992
ENSMUSG00000031608	Galnt7	2910.93	0.967509	0.250397	3.8639	0.00011159	0.00313566
ENSMUSG00000022136	Dnajc3	5710.67	0.966149	0.185009	5.22218	1.76829e-07	1.79082e-05
ENSMUSG00000016528	Mapkapk2	2325.03	0.963734	0.208093	4.63126	3.63449e-06	0.000210414
ENSMUSG00000018189	Uchl5	643.436	0.953893	0.266262	3.58253	0.000340277	0.00756862
ENSMUSG00000007029	Vars	1504.53	0.953071	0.235557	4.04604	5.20923e-05	0.0017321
ENSMUSG00000105326	NA	983.453	0.950592	0.244935	3.881	0.000104028	0.00297385
ENSMUSG00000022283	Pabpc1	14167.7	0.950051	0.183098	5.18875	2.11716e-07	2.05743e-05
ENSMUSG00000032382	Snx1	2827.71	0.95003	0.266441	3.56563	0.00036298	0.00792247
ENSMUSG00000025393	Atp5b	12267.9	0.94447	0.15235	6.19934	5.67009e-10	1.42415e-07
ENSMUSG00000023027	Atf1	1759.58	0.941698	0.174511	5.3962	6.80656e-08	7.99452e-06
ENSMUSG00000020873	Slc35b1	1026.91	0.940646	0.243672	3.8603	0.000113248	0.00316357
ENSMUSG00000027828	Ssr3	7267.26	0.93975	0.158428	5.93172	2.99778e-09	6.35607e-07
ENSMUSG00000020267	Hint1	584.737	0.939377	0.243151	3.86335	0.000111842	0.00313734
ENSMUSG00000079658	Eloc	1281.21	0.938157	0.215229	4.35887	1.30733e-05	0.00061156
ENSMUSG00000044533	Rps2	795.604	0.935862	0.245123	3.81792	0.000134579	0.00364199
ENSMUSG00000020869	Lrrc59	2545.32	0.931887	0.165341	5.63617	1.73879e-08	2.62847e-06
ENSMUSG00000027248	Pdia3	19033	0.930317	0.16843	5.52345	3.32408e-08	4.48503e-06
ENSMUSG00000085238	4930479D17Rik	307.774	0.930035	0.232241	4.00461	6.2119e-05	0.0020003
ENSMUSG00000041084	Ostc	1338.73	0.92976	0.210716	4.41238	1.02242e-05	0.000495312
ENSMUSG00000003226	Ranbp2	6907.24	0.926275	0.159954	5.79088	7.00193e-09	1.28442e-06
ENSMUSG00000036894	Rap2b	745.656	0.923928	0.26462	3.49153	0.000480267	0.0097114
ENSMUSG00000027808	Serp1	4496.38	0.920505	0.23159	3.97472	7.04623e-05	0.002208
ENSMUSG00000019832	Rab32	3023.65	0.91771	0.196714	4.6652	3.08322e-06	0.000184383
ENSMUSG00000030603	Psmc4	869.679	0.914805	0.141662	6.45767	1.06327e-10	3.15617e-08
ENSMUSG00000024067	Dpy30	310.26	0.914379	0.258798	3.53318	0.000410598	0.00865866
ENSMUSG00000068039	Tcp1	2179.12	0.913228	0.172658	5.28923	1.22835e-07	1.31934e-05
ENSMUSG00000041697	Cox6a1	1369.51	0.912899	0.205534	4.44158	8.92991e-06	0.000439126
ENSMUSG00000033991	Ttc37	1204.85	0.90975	0.212455	4.28208	1.8515e-05	0.000793376
ENSMUSG00000056220	Pla2g4a	4102.91	0.909259	0.258266	3.52063	0.00043053	0.00887479
ENSMUSG00000038991	Txndc5	910.405	0.907781	0.260846	3.48014	0.000501146	0.00996644
ENSMUSG00000025823	Pdia4	4293.39	0.905833	0.211815	4.27652	1.89834e-05	0.000802911
ENSMUSG00000021486	Prelid1	1062.76	0.905378	0.219246	4.1295	3.63552e-05	0.00132782
ENSMUSG00000024360	Etf1	2026.11	0.898368	0.167843	5.35241	8.67882e-08	9.90842e-06
ENSMUSG00000028403	Zdhhc21	2218.94	0.895324	0.237996	3.76193	0.000168609	0.00437195
ENSMUSG00000029404	Arl6ip4	469.62	0.89345	0.202071	4.42147	9.80328e-06	0.000477756
ENSMUSG00000024359	Hspa9	1610.7	0.891225	0.20887	4.26688	1.98224e-05	0.000826852
ENSMUSG00000033220	Rac2	4158.77	0.885858	0.180167	4.91688	8.79334e-07	6.52546e-05
ENSMUSG00000021957	Tkt	1953.97	0.882617	0.190407	4.63541	3.56223e-06	0.000206964
ENSMUSG00000025534	Gusb	11391	0.878847	0.120434	7.29734	2.93517e-13	1.72873e-10
ENSMUSG00000027199	Gatm	6595.48	0.876011	0.175414	4.99395	5.91568e-07	4.66567e-05
ENSMUSG00000035726	Supt16	2157.59	0.875826	0.186284	4.70155	2.58188e-06	0.000158465
ENSMUSG00000057406	Nsd2	4232.62	0.873896	0.233271	3.74628	0.000179479	0.00457125
ENSMUSG00000052310	Slc39a1	1077.33	0.871191	0.200022	4.35548	1.32777e-05	0.000615827
ENSMUSG00000020358	Hnrnpab	1773.76	0.870698	0.170806	5.09759	3.44006e-07	3.01991e-05
ENSMUSG00000054808	Actn4	2008.63	0.870087	0.167253	5.20223	1.96916e-07	1.93666e-05
ENSMUSG00000005481	Ddx39	650.876	0.869898	0.242989	3.58	0.000343598	0.00761138
ENSMUSG00000047675	Rps8	540.91	0.868867	0.21756	3.99369	6.50519e-05	0.00207263
ENSMUSG00000047694	Yipf6	3269.98	0.863487	0.201859	4.27767	1.88864e-05	0.000802031
ENSMUSG00000021595	Nsun2	1288.69	0.863113	0.211602	4.07895	4.52388e-05	0.00156476
ENSMUSG00000020571	Pdia6	4227.91	0.857642	0.205773	4.1679	3.07424e-05	0.00115912
ENSMUSG00000039244	E130309D02Rik	974.003	0.855937	0.22912	3.73576	0.000187148	0.00470784
ENSMUSG00000040274	Cdk6	12624.7	0.854818	0.200738	4.25838	2.05915e-05	0.000848931
ENSMUSG00000025613	Cct8	1956.02	0.851464	0.206693	4.11947	3.79743e-05	0.00137465
ENSMUSG00000027067	Ssrp1	1333.89	0.850552	0.187673	4.53211	5.83987e-06	0.000311574
ENSMUSG00000040212	Emp3	1865.22	0.850391	0.235299	3.61409	0.000301407	0.00696994
ENSMUSG00000026926	Pmpca	1683.12	0.846509	0.217358	3.89454	9.83843e-05	0.00288575
ENSMUSG00000026083	Eif5b	3586.79	0.845576	0.15657	5.40063	6.64068e-08	7.85621e-06
ENSMUSG00000071644	Eef1g	860.337	0.845156	0.231657	3.64831	0.000263969	0.00625481
ENSMUSG00000048970	C1galt1c1	1135.59	0.842411	0.221749	3.79894	0.000145316	0.00386388
ENSMUSG00000022427	Tomm22	722.658	0.84063	0.237596	3.53806	0.000403079	0.00851314
ENSMUSG00000030560	Ctsc	18091.2	0.83622	0.160397	5.21345	1.85364e-07	1.83409e-05
ENSMUSG00000021831	Ero1l	722.557	0.834889	0.184599	4.52271	6.10536e-06	0.000321536
ENSMUSG00000022234	Cct5	2084.83	0.831969	0.138407	6.01103	1.84348e-09	4.23897e-07
ENSMUSG00000030591	Psmd8	1151.05	0.829356	0.203898	4.06751	4.75186e-05	0.00161295
ENSMUSG00000063524	Eno1	2419.55	0.824617	0.195677	4.21417	2.507e-05	0.000986249
ENSMUSG00000003970	Rpl8	3679.69	0.820854	0.156282	5.25239	1.50138e-07	1.54161e-05
ENSMUSG00000020464	Pnpt1	1013.28	0.819814	0.20291	4.04029	5.33855e-05	0.0017566
ENSMUSG00000023110	Prmt5	920.285	0.818893	0.190551	4.29751	1.72729e-05	0.000756458
ENSMUSG00000016319	Slc25a5	1466.94	0.816913	0.139035	5.87562	4.21275e-09	8.49103e-07
ENSMUSG00000023068	Nus1	1808.04	0.814209	0.166574	4.88796	1.01886e-06	7.42585e-05
ENSMUSG00000022120	Rnf219	696.672	0.814114	0.23186	3.51123	0.000446043	0.00911402
ENSMUSG00000028843	Sh3bgrl3	8121.4	0.811966	0.158784	5.11365	3.15985e-07	2.85015e-05
ENSMUSG00000021423	Ly86	36626.5	0.809855	0.191127	4.23725	2.26271e-05	0.000908345
ENSMUSG00000024712	Rfk	966.594	0.799457	0.223152	3.58257	0.000340229	0.00756862
ENSMUSG00000053907	Mat2a	5635.93	0.798732	0.184925	4.31923	1.56577e-05	0.000697084
ENSMUSG00000041133	Smc1a	3150.77	0.79306	0.209465	3.78613	0.000153013	0.00404877
ENSMUSG00000028691	Prdx1	1099.28	0.792661	0.156069	5.07892	3.79589e-07	3.2874e-05
ENSMUSG00000008140	Emc10	2916.84	0.792347	0.173414	4.5691	4.89825e-06	0.000272003
ENSMUSG00000032437	Stt3b	3267.49	0.791847	0.172166	4.59932	4.23866e-06	0.000238622
ENSMUSG00000040952	Rps19	834.595	0.791576	0.18422	4.2969	1.73203e-05	0.000756458
ENSMUSG00000056076	Eif3b	1087.01	0.789111	0.222821	3.54145	0.000397929	0.00844592
ENSMUSG00000028410	Dnaja1	1617.47	0.788128	0.226334	3.48215	0.000497405	0.00993957
ENSMUSG00000030062	Rpn1	4197.64	0.786879	0.187648	4.19338	2.74826e-05	0.00106575
ENSMUSG00000019179	Mdh2	2811.76	0.78539	0.188505	4.16642	3.09419e-05	0.00116396
ENSMUSG00000026174	Cnot9	956.022	0.785289	0.212885	3.6888	0.000225312	0.00548601
ENSMUSG00000020806	Rhbdf2	1518.34	0.784701	0.218201	3.59623	0.000322857	0.00726171
ENSMUSG00000042747	Krtcap2	660.004	0.783356	0.225168	3.47898	0.000503329	0.00996681
ENSMUSG00000042111	Ccdc115	788.862	0.782925	0.194286	4.02975	5.58367e-05	0.00182318
ENSMUSG00000003810	Mast2	1767.19	0.78115	0.163552	4.77616	1.78677e-06	0.000118212
ENSMUSG00000023106	Denr	1153.07	0.777047	0.220495	3.5241	0.000424926	0.00882613
ENSMUSG00000024991	Eif3a	8132.74	0.77645	0.131449	5.90685	3.4872e-09	7.20659e-07
ENSMUSG00000021998	Lcp1	29816.1	0.773274	0.139603	5.53909	3.04052e-08	4.17138e-06
ENSMUSG00000004460	Dnajb11	3980.82	0.77073	0.20387	3.7805	0.000156514	0.00412137
ENSMUSG00000066150	Slc31a1	2689.13	0.76916	0.199984	3.84611	0.000120008	0.00329286
ENSMUSG00000059897	Zfp930	512.986	0.76635	0.192787	3.9751	7.03486e-05	0.002208
ENSMUSG00000043207	Zmpste24	3359.13	0.766092	0.157234	4.8723	1.10305e-06	8.0037e-05
ENSMUSG00000040552	C3ar1	23739	0.765295	0.186445	4.10468	4.04878e-05	0.00144324
ENSMUSG00000016252	Atp5e	712.416	0.765188	0.198899	3.84711	0.000119519	0.00328496
ENSMUSG00000026229	Psmd1	2172.65	0.763759	0.212402	3.59582	0.000323365	0.00726171
ENSMUSG00000029174	Tbc1d1	1214.74	0.760321	0.179661	4.23197	2.31655e-05	0.000926959
ENSMUSG00000093674	Rpl41	1928.66	0.756642	0.190115	3.97992	6.89375e-05	0.00217273
ENSMUSG00000030216	Wbp11	1503.31	0.755378	0.189369	3.98893	6.63727e-05	0.00210579
ENSMUSG00000026341	Actr3	6467.67	0.753653	0.169327	4.45087	8.55222e-06	0.000425682
ENSMUSG00000032423	Syncrip	3607.53	0.753244	0.211819	3.55608	0.000376428	0.0081076
ENSMUSG00000038965	Ube2l3	2560.42	0.753067	0.148984	5.05469	4.31088e-07	3.59079e-05
ENSMUSG00000018326	Ywhab	6706.26	0.752807	0.173005	4.35137	1.35291e-05	0.000625713
ENSMUSG00000026356	Dars	1052.36	0.751805	0.189437	3.96863	7.22873e-05	0.00225222
ENSMUSG00000056536	Pign	4633.44	0.744074	0.176563	4.21422	2.50648e-05	0.000986249
ENSMUSG00000066232	Ipo7	3464.75	0.742714	0.194548	3.81763	0.00013474	0.00364199
ENSMUSG00000031885	Cbfb	3340.73	0.739359	0.20365	3.63053	0.000282841	0.00663457
ENSMUSG00000005483	Dnajb1	1307.31	0.738687	0.209235	3.53041	0.00041491	0.00870671
ENSMUSG00000034120	Srsf2	9367.39	0.737948	0.175528	4.20415	2.62064e-05	0.00102356
ENSMUSG00000041779	Tram2	1899.63	0.7358	0.204802	3.59274	0.000327224	0.00732819
ENSMUSG00000032399	Rpl4	9922	0.734854	0.132503	5.54596	2.92351e-08	4.04485e-06
ENSMUSG00000037275	Gemin5	1321.14	0.732918	0.210358	3.48415	0.000493702	0.00988979
ENSMUSG00000032601	Prkar2a	1404.68	0.732598	0.176007	4.16232	3.15029e-05	0.00118234
ENSMUSG00000036371	Serbp1	8291.11	0.730683	0.17464	4.18394	2.86497e-05	0.00110396
ENSMUSG00000030082	Sec61a1	3740.72	0.728431	0.142092	5.12646	2.95234e-07	2.70786e-05
ENSMUSG00000027722	Spata5	956.268	0.727461	0.201664	3.6073	0.000309404	0.00709456
ENSMUSG00000058799	Nap1l1	1308.69	0.723588	0.130302	5.55315	2.80563e-08	3.94868e-06
ENSMUSG00000030786	Itgam	57758.8	0.722418	0.176913	4.08346	4.43695e-05	0.001545
ENSMUSG00000029580	Actb	101806	0.720738	0.14011	5.14409	2.68826e-07	2.50791e-05
ENSMUSG00000031232	Magt1	4666.09	0.71881	0.175985	4.0845	4.41716e-05	0.00154421
ENSMUSG00000050912	Tmem123	2560.6	0.717208	0.180068	3.98298	6.80555e-05	0.00215325
ENSMUSG00000021427	Ssr1	5631.44	0.716709	0.150511	4.76184	1.91836e-06	0.000124283
ENSMUSG00000001794	Capns1	4425.57	0.714163	0.17067	4.18448	2.85826e-05	0.00110396
ENSMUSG00000045983	Eif4g1	6131.17	0.713124	0.169045	4.21855	2.45877e-05	0.000976687
ENSMUSG00000019579	Mydgf	1331.71	0.710249	0.179431	3.95834	7.5471e-05	0.00231605
ENSMUSG00000054408	Spcs3	4541.42	0.708559	0.153411	4.6187	3.8616e-06	0.000221209
ENSMUSG00000002718	Cse1l	3400.98	0.704487	0.17427	4.04251	5.28823e-05	0.00174416
ENSMUSG00000027540	Ptpn1	6834	0.704266	0.192699	3.65476	0.000257427	0.00614054
ENSMUSG00000027006	Dnajc10	1466.21	0.700691	0.167062	4.19419	2.73851e-05	0.0010645
ENSMUSG00000030738	Eif3c	4248.26	0.698268	0.1332	5.24224	1.5864e-07	1.61873e-05
ENSMUSG00000039782	Cpeb2	4784.64	0.696024	0.172436	4.03642	5.42729e-05	0.00177567
ENSMUSG00000027177	Hipk3	2899.37	0.695857	0.177346	3.92372	8.71939e-05	0.00258823
ENSMUSG00000022905	Kpna1	2235.87	0.692337	0.130797	5.29321	1.20187e-07	1.29946e-05
ENSMUSG00000024513	Mbd2	975.797	0.689447	0.19544	3.52767	0.000419233	0.00875084
ENSMUSG00000006740	Kif5b	3067.9	0.687554	0.184617	3.72421	0.000195928	0.00486868
ENSMUSG00000020238	Ncln	1966.61	0.686383	0.183074	3.74922	0.000177385	0.00453206
ENSMUSG00000054766	Set	1117.64	0.678961	0.136326	4.98042	6.34471e-07	4.94275e-05
ENSMUSG00000039703	Nploc4	1681.87	0.675912	0.172189	3.92542	8.65798e-05	0.00257938
ENSMUSG00000034024	Cct2	2860.14	0.675653	0.164868	4.09814	4.16477e-05	0.00147813
ENSMUSG00000058715	Fcer1g	20951.8	0.669967	0.130757	5.12375	2.99519e-07	2.73181e-05
ENSMUSG00000031996	Aplp2	3284.98	0.669696	0.188184	3.55874	0.00037264	0.00804724
ENSMUSG00000022789	Dnm1l	2349.11	0.667003	0.162572	4.10282	4.08146e-05	0.00145172
ENSMUSG00000018848	Rars	1557.91	0.665594	0.161057	4.13266	3.58588e-05	0.00131263
ENSMUSG00000021054	Sgpp1	2997.42	0.663749	0.188783	3.51594	0.000438199	0.00900701
ENSMUSG00000041720	Pi4ka	2949.08	0.663239	0.182934	3.62557	0.000288324	0.00672454
ENSMUSG00000004897	Hdgf	1160.32	0.663138	0.174018	3.81075	0.000138545	0.00373247
ENSMUSG00000032116	Stt3a	6491.44	0.662667	0.162816	4.07005	4.70039e-05	0.00160541
ENSMUSG00000029103	Lrpap1	1990.98	0.659544	0.18414	3.58175	0.000341303	0.0075708
ENSMUSG00000021116	Eif2s1	1612.28	0.656963	0.182189	3.60595	0.000311013	0.00710585
ENSMUSG00000027184	Caprin1	9633.29	0.655993	0.114158	5.74634	9.11982e-09	1.58394e-06
ENSMUSG00000071180	Smim15	1397.94	0.653952	0.185479	3.52575	0.000422293	0.00879091
ENSMUSG00000008892	Vdac3	824.61	0.651727	0.186427	3.49589	0.000472491	0.00959439
ENSMUSG00000006005	Tpr	7810.5	0.646004	0.154949	4.16913	3.05767e-05	0.00115555
ENSMUSG00000051223	Bzw1	2258.03	0.644288	0.144713	4.45217	8.50072e-06	0.000424412
ENSMUSG00000041057	Wdr43	1655.92	0.643248	0.15293	4.20615	2.59758e-05	0.00101698
ENSMUSG00000029203	Ube2k	2988.9	0.642853	0.169163	3.80019	0.000144583	0.00385068
ENSMUSG00000001924	Uba1	5140.11	0.642429	0.136363	4.71115	2.46318e-06	0.000151751
ENSMUSG00000078622	Ccdc47	4069.64	0.641674	0.183821	3.49075	0.000481675	0.00972042
ENSMUSG00000079111	Kdelr2	3285.5	0.641418	0.158018	4.05914	4.92535e-05	0.00165796
ENSMUSG00000014867	Surf4	5006.11	0.636938	0.180389	3.53092	0.000414121	0.008705
ENSMUSG00000025428	Atp5a1	5926.68	0.633171	0.138646	4.56683	4.95153e-06	0.000274029
ENSMUSG00000026281	Dtymk	971.961	0.633008	0.175508	3.60672	0.000310095	0.00710044
ENSMUSG00000027905	Ddx20	649.323	0.632424	0.173051	3.65454	0.000257642	0.00614054
ENSMUSG00000027775	Mfsd1	4856.4	0.626711	0.158363	3.95744	7.57584e-05	0.00232051
ENSMUSG00000061136	Prpf40a	2938.63	0.62091	0.166619	3.72652	0.000194144	0.00483169
ENSMUSG00000007458	M6pr	3946.57	0.618933	0.137876	4.48906	7.15375e-06	0.000371247
ENSMUSG00000029110	Rnf4	2739.74	0.61371	0.162695	3.77216	0.000161839	0.00424312
ENSMUSG00000020687	Cdc27	2781.62	0.612588	0.142836	4.28875	1.79679e-05	0.000780169
ENSMUSG00000006498	Ptbp1	6036	0.61117	0.167819	3.64185	0.000270686	0.00637695
ENSMUSG00000029064	Gnb1	8915.82	0.605492	0.155777	3.8869	0.000101531	0.002939
ENSMUSG00000015852	Fcrls	32489.5	0.600383	0.134403	4.46703	7.93118e-06	0.00040088
ENSMUSG00000020149	Rab1a	9137.17	0.595209	0.111975	5.31557	1.06325e-07	1.18086e-05
ENSMUSG00000029048	Rer1	2314.6	0.592863	0.16981	3.49132	0.000480633	0.0097114
ENSMUSG00000005374	Tbl2	1888.69	0.592791	0.156161	3.79602	0.00014704	0.00390337
ENSMUSG00000022125	Cln5	4389.65	0.589817	0.167502	3.52125	0.000429511	0.00886498
ENSMUSG00000029622	Arpc1b	6163.29	0.588924	0.115235	5.11064	3.21072e-07	2.88012e-05
ENSMUSG00000022285	Ywhaz	11257.3	0.588758	0.115909	5.07949	3.78452e-07	3.2874e-05
ENSMUSG00000020368	Canx	15044.7	0.579683	0.163277	3.55031	0.000384776	0.00824391
ENSMUSG00000029169	Dhx15	5618.71	0.578559	0.163233	3.54438	0.000393533	0.00837655
ENSMUSG00000039911	Spsb1	3292.22	0.57673	0.16166	3.56755	0.00036034	0.00788593
ENSMUSG00000005610	Eif4g2	21649.8	0.575799	0.119246	4.82868	1.37444e-06	9.58934e-05
ENSMUSG00000033629	Hacd3	1686.77	0.575424	0.165373	3.47956	0.000502238	0.00996644
ENSMUSG00000024583	Txnl1	1543.58	0.575279	0.143161	4.01839	5.8597e-05	0.00189812
ENSMUSG00000030304	Ergic2	1199.48	0.567855	0.162393	3.4968	0.000470874	0.00957346
ENSMUSG00000063273	Naa15	3058.18	0.562535	0.155452	3.61871	0.00029608	0.00687597
ENSMUSG00000031207	Msn	29821.1	0.562355	0.155959	3.60579	0.000311202	0.00710585
ENSMUSG00000028249	Sdcbp	9097.5	0.558771	0.13684	4.08339	4.43835e-05	0.001545
ENSMUSG00000020849	Ywhae	16681.6	0.558105	0.116827	4.7772	1.77755e-06	0.000118212
ENSMUSG00000004980	Hnrnpa2b1	14096.3	0.556337	0.153295	3.62918	0.000284325	0.00665027
ENSMUSG00000026667	Uhmk1	6056.55	0.548897	0.139694	3.92929	8.51973e-05	0.0025503
ENSMUSG00000025016	Tm9sf3	5960.35	0.548581	0.138103	3.97227	7.11918e-05	0.00222658
ENSMUSG00000028041	Adam15	8016.59	0.546475	0.137361	3.97838	6.93863e-05	0.00218266
ENSMUSG00000001440	Kpnb1	7556.75	0.546463	0.150877	3.62192	0.000292425	0.00681045
ENSMUSG00000021794	Glud1	5569.41	0.544142	0.133778	4.0675	4.75211e-05	0.00161295
ENSMUSG00000013662	Atad1	3438.37	0.535711	0.152303	3.5174	0.000435801	0.00897211
ENSMUSG00000042699	Dhx9	7257.08	0.534985	0.121567	4.40073	1.07888e-05	0.00051805
ENSMUSG00000019731	Slc35e1	2340.89	0.53288	0.134899	3.9502	7.80848e-05	0.00236514
ENSMUSG00000057522	Spop	2914.74	0.527204	0.14698	3.58692	0.00033461	0.00746291
ENSMUSG00000032187	Smarca4	4150.38	0.523654	0.135564	3.86278	0.000112104	0.00313928
ENSMUSG00000037742	Eef1a1	11846.4	0.520879	0.13464	3.86867	0.000109432	0.00309098
ENSMUSG00000029147	Ppm1g	1795.57	0.516978	0.141647	3.64975	0.000262492	0.00624701
ENSMUSG00000039630	Hnrnpu	10771.4	0.504392	0.115305	4.37442	1.21758e-05	0.000574515
ENSMUSG00000030707	Coro1a	8895.9	0.490457	0.119004	4.12134	3.76679e-05	0.00136659
ENSMUSG00000048779	P2ry6	11978.6	0.484285	0.131952	3.67016	0.000242395	0.00584541
ENSMUSG00000035152	Ap2b1	3936.55	0.477746	0.111513	4.28421	1.83387e-05	0.000787888
ENSMUSG00000018707	Dync1h1	14408	0.476126	0.109524	4.34724	1.37864e-05	0.000634018
ENSMUSG00000031592	Pcm1	4152.08	0.474896	0.131452	3.61269	0.000303036	0.00699769
ENSMUSG00000054693	Adam10	9383.01	0.47325	0.117815	4.0169	5.89686e-05	0.00190638
ENSMUSG00000062203	Gspt1	3122.11	0.445389	0.114544	3.88837	0.00010092	0.00292649
ENSMUSG00000020152	Actr2	8403.16	0.431985	0.115403	3.74327	0.00018164	0.00460104
ENSMUSG00000006699	Cdc42	10089.6	0.422245	0.116992	3.60919	0.000307158	0.00705296
ENSMUSG00000032580	Rbm5	14639.6	-0.372496	0.106291	-3.50449	0.000457488	0.0093129
ENSMUSG00000030737	Slco2b1	37343.6	-0.388834	0.10474	-3.71238	0.000205317	0.00507112
ENSMUSG00000062822	4833420G17Rik	2423.99	-0.429653	0.113478	-3.78621	0.000152965	0.00404877
ENSMUSG00000024457	Trim26	2749.85	-0.456574	0.122195	-3.73643	0.000186653	0.00470261
ENSMUSG00000051504	Siglech	21063.4	-0.46945	0.121887	-3.85152	0.000117388	0.00323728
ENSMUSG00000030557	Mef2a	30216.3	-0.470137	0.110245	-4.26449	2.00356e-05	0.000830208
ENSMUSG00000041890	Git2	13624.9	-0.475001	0.117902	-4.02879	5.60642e-05	0.00182332
ENSMUSG00000022855	Senp2	4063.63	-0.481782	0.130129	-3.70234	0.000213617	0.00525226
ENSMUSG00000031129	Slc9a9	5563.58	-0.48708	0.116808	-4.1699	3.04731e-05	0.0011543
ENSMUSG00000029468	P2rx7	7961.92	-0.490989	0.113553	-4.32387	1.53314e-05	0.000687641
ENSMUSG00000041642	Kif21b	14471.7	-0.499525	0.124979	-3.99688	6.41826e-05	0.00205864
ENSMUSG00000029229	Chic2	1657.29	-0.504583	0.134981	-3.73818	0.000185359	0.00467723
ENSMUSG00000023150	Ivns1abp	25644.2	-0.527415	0.137619	-3.83242	0.000126888	0.00345839
ENSMUSG00000024544	Ldlrad4	1752.36	-0.53709	0.14501	-3.70381	0.000212389	0.00522997
ENSMUSG00000029471	Camkk2	2150.46	-0.546435	0.153462	-3.56071	0.000369853	0.00800539
ENSMUSG00000033016	Nfatc1	8209.36	-0.547031	0.143931	-3.80064	0.000144324	0.00385006
ENSMUSG00000030844	Rgs10	5179.75	-0.551256	0.113528	-4.85568	1.19973e-06	8.59068e-05
ENSMUSG00000026034	Clk1	8596.4	-0.554698	0.149903	-3.70038	0.000215277	0.00528514
ENSMUSG00000020865	Abcc3	5453.66	-0.555199	0.150754	-3.68282	0.000230666	0.00560396
ENSMUSG00000031665	Sall1	26917.9	-0.558616	0.134455	-4.15467	3.25755e-05	0.00121422
ENSMUSG00000037369	Kdm6a	2788.9	-0.561351	0.145549	-3.85678	0.000114892	0.00319001
ENSMUSG00000085095	NA	6483.21	-0.564473	0.132307	-4.26638	1.98673e-05	0.000826852
ENSMUSG00000033697	Arhgap39	6929.35	-0.566906	0.15902	-3.56499	0.000363868	0.00793126
ENSMUSG00000069874	Irgm2	2928.98	-0.586483	0.144432	-4.06061	4.89439e-05	0.00165095
ENSMUSG00000020709	Adap2	7456.99	-0.60492	0.155523	-3.88959	0.000100413	0.00291699
ENSMUSG00000021948	Prkcd	11430.1	-0.612602	0.153045	-4.00276	6.26087e-05	0.00201211
ENSMUSG00000034610	Tut4	1858.37	-0.615349	0.174177	-3.5329	0.000411029	0.00865866
ENSMUSG00000109539	NA	2270.87	-0.630582	0.178953	-3.52373	0.000425514	0.00882713
ENSMUSG00000040272	Accs	2838.49	-0.632183	0.155464	-4.06642	4.77409e-05	0.00161705
ENSMUSG00000020707	Rnf135	798.634	-0.635352	0.179547	-3.53864	0.000402201	0.00851314
ENSMUSG00000042628	Zfyve1	1641.75	-0.635556	0.180864	-3.51401	0.000441404	0.00904187
ENSMUSG00000035967	Ints6l	13691.4	-0.640829	0.10055	-6.37321	1.85116e-10	5.12239e-08
ENSMUSG00000022822	Abcc5	4967.35	-0.645328	0.150802	-4.2793	1.87478e-05	0.000799157
ENSMUSG00000038910	Plcl2	3284.41	-0.649864	0.111816	-5.81192	6.17606e-09	1.17245e-06
ENSMUSG00000032089	Il10ra	8004.5	-0.651538	0.180976	-3.60014	0.000318045	0.00719169
ENSMUSG00000027799	Nbea	3240.43	-0.652317	0.128862	-5.06213	4.14606e-07	3.50718e-05
ENSMUSG00000027215	Cd82	991.053	-0.657961	0.179594	-3.6636	0.000248694	0.00596208
ENSMUSG00000020101	Vsir	20571.2	-0.65997	0.167758	-3.93407	8.35186e-05	0.0025111
ENSMUSG00000035697	Arhgap45	9010.41	-0.661539	0.18396	-3.59609	0.000323031	0.00726171
ENSMUSG00000041797	Abca9	23375.2	-0.663654	0.156517	-4.24014	2.23381e-05	0.000904944
ENSMUSG00000029765	Plxna4	4262.77	-0.665351	0.127431	-5.22127	1.77699e-07	1.79082e-05
ENSMUSG00000027947	Il6ra	13231.3	-0.667006	0.168835	-3.95063	7.79461e-05	0.00236514
ENSMUSG00000041762	Gpr155	4395.38	-0.67146	0.143487	-4.6796	2.87436e-06	0.000173161
ENSMUSG00000105304	NA	864.956	-0.673715	0.165843	-4.06237	4.85773e-05	0.00164197
ENSMUSG00000052512	Nav2	7398.58	-0.680635	0.192206	-3.54118	0.000398344	0.00844592
ENSMUSG00000026425	Srgap2	28031.3	-0.683867	0.134017	-5.10282	3.34626e-07	2.9853e-05
ENSMUSG00000024451	Arap3	6355.26	-0.68633	0.176861	-3.88062	0.000104192	0.00297385
ENSMUSG00000085802	NA	1586.09	-0.69118	0.138395	-4.99427	5.906e-07	4.66567e-05
ENSMUSG00000040061	Plcb2	5340.73	-0.692234	0.1821	-3.80139	0.000143889	0.00384473
ENSMUSG00000029919	Hpgds	16670	-0.692497	0.179786	-3.85179	0.000117257	0.00323728
ENSMUSG00000025409	Mbd6	3807.01	-0.697275	0.150654	-4.62833	3.68621e-06	0.000211905
ENSMUSG00000030064	Frmd4b	11646.2	-0.698794	0.143622	-4.86551	1.14161e-06	8.24685e-05
ENSMUSG00000059895	Ptp4a3	2051.9	-0.699788	0.176501	-3.96479	7.34596e-05	0.00227571
ENSMUSG00000028859	Csf3r	17944.6	-0.702195	0.168044	-4.17865	2.93248e-05	0.00111948
ENSMUSG00000036353	P2ry12	36607.8	-0.704587	0.177773	-3.9634	7.38907e-05	0.00228352
ENSMUSG00000020423	Btg2	1901.73	-0.705905	0.192041	-3.6758	0.000237108	0.00573485
ENSMUSG00000037257	Aagab	1833.32	-0.706914	0.196085	-3.60515	0.000311976	0.00711358
ENSMUSG00000034041	Lyl1	4107.73	-0.712234	0.180101	-3.95463	7.66518e-05	0.00233473
ENSMUSG00000070942	Il1rl2	3061.77	-0.714352	0.194593	-3.671	0.000241599	0.00583484
ENSMUSG00000037235	Mxd4	2965.49	-0.716751	0.200858	-3.56844	0.000359118	0.00786975
ENSMUSG00000043323	Fbrsl1	5603.5	-0.717058	0.155379	-4.61491	3.93268e-06	0.000224493
ENSMUSG00000048310	Pskh1	779.305	-0.7187	0.191621	-3.75062	0.000176395	0.00451384
ENSMUSG00000040746	Rnf167	2200.47	-0.732381	0.196158	-3.73363	0.000188739	0.00474055
ENSMUSG00000020883	Fbxl20	5688.26	-0.733723	0.180319	-4.06902	4.72117e-05	0.00160914
ENSMUSG00000090939	NA	677.323	-0.741269	0.174902	-4.2382	2.2532e-05	0.000908289
ENSMUSG00000032596	Uba7	3107.47	-0.742337	0.209803	-3.53826	0.00040277	0.00851314
ENSMUSG00000110397	NA	2019.79	-0.742979	0.155228	-4.78636	1.6983e-06	0.000115048
ENSMUSG00000110914	NA	3075.41	-0.744343	0.180059	-4.13388	3.56695e-05	0.00131158
ENSMUSG00000110235	Gm5086	2074.11	-0.745296	0.164826	-4.52172	6.13382e-06	0.000321996
ENSMUSG00000040229	Gpr34	7073.39	-0.75148	0.141571	-5.30816	1.10739e-07	1.21337e-05
ENSMUSG00000029726	Mepce	1249.15	-0.763201	0.161373	-4.72942	2.25167e-06	0.000140846
ENSMUSG00000029330	Cds1	2283.63	-0.765319	0.176042	-4.34736	1.37784e-05	0.000634018
ENSMUSG00000078485	Plekhn1	1242.82	-0.767211	0.219854	-3.48964	0.000483677	0.00973676
ENSMUSG00000034445	Cyb561a3	3507.02	-0.770968	0.154816	-4.97989	6.36196e-07	4.94275e-05
ENSMUSG00000032827	Ppp1r9a	7750.69	-0.773531	0.196428	-3.93798	8.2171e-05	0.00247971
ENSMUSG00000107468	NA	958.002	-0.774707	0.166199	-4.66131	3.14204e-06	0.000186235
ENSMUSG00000048120	Entpd1	15280	-0.778032	0.192153	-4.04903	5.14304e-05	0.00171708
ENSMUSG00000103591	NA	1184.45	-0.782049	0.180536	-4.33181	1.4789e-05	0.000668823
ENSMUSG00000036561	Ppp6r2	1809.88	-0.786461	0.191236	-4.11251	3.91385e-05	0.0014083
ENSMUSG00000004661	Arid3b	2868.64	-0.79218	0.204854	-3.86705	0.000110161	0.00310621
ENSMUSG00000021366	Hivep1	2340.78	-0.801573	0.19182	-4.17877	2.9309e-05	0.00111948
ENSMUSG00000019850	Tnfaip3	1930.76	-0.806526	0.161278	-5.00085	5.70794e-07	4.56803e-05
ENSMUSG00000117613	NA	6181.14	-0.807844	0.208623	-3.87227	0.000107826	0.00305091
ENSMUSG00000048249	Crebrf	2460.95	-0.811372	0.154197	-5.26191	1.42565e-07	1.48249e-05
ENSMUSG00000052724	NA	938.486	-0.814187	0.225498	-3.61061	0.00030548	0.00703587
ENSMUSG00000039046	Usp6nl	997.999	-0.817236	0.218332	-3.74308	0.000181776	0.00460104
ENSMUSG00000040848	Sft2d2	7087.03	-0.822538	0.215734	-3.81275	0.000137431	0.0037086
ENSMUSG00000032549	Rab6b	3324.68	-0.827482	0.150794	-5.48749	4.07681e-08	5.28238e-06
ENSMUSG00000042675	Ypel3	2099.83	-0.831966	0.231343	-3.59624	0.000322847	0.00726171
ENSMUSG00000026113	Inpp4a	1636.21	-0.837251	0.156357	-5.35473	8.56861e-08	9.85149e-06
ENSMUSG00000035776	Cd99l2	592.236	-0.841828	0.184887	-4.55321	5.28345e-06	0.000287525
ENSMUSG00000097275	NA	555.563	-0.842738	0.199887	-4.21607	2.486e-05	0.000985108
ENSMUSG00000037972	Snn	1792.44	-0.848006	0.176086	-4.81585	1.46575e-06	0.000100545
ENSMUSG00000083700	NA	392.207	-0.851114	0.213064	-3.99464	6.47933e-05	0.0020714
ENSMUSG00000029650	Slc46a3	1935.9	-0.867535	0.182984	-4.74103	2.12635e-06	0.000134034
ENSMUSG00000103039	NA	395.181	-0.890146	0.220339	-4.0399	5.34749e-05	0.0017566
ENSMUSG00000035713	Usp35	1199.83	-0.895291	0.237795	-3.76497	0.00016657	0.00434413
ENSMUSG00000046027	Stard5	1010.37	-0.895992	0.249283	-3.59427	0.000325301	0.00729514
ENSMUSG00000046168	Kcnrg	1641.19	-0.903029	0.244459	-3.69398	0.000220767	0.00539558
ENSMUSG00000058192	Zfp846	712.03	-0.911328	0.23429	-3.88974	0.00010035	0.00291699
ENSMUSG00000039763	Dnajc28	663.144	-0.914165	0.257762	-3.54655	0.000390316	0.0083298
ENSMUSG00000115816	Gm34589	1131.85	-0.915143	0.242638	-3.77164	0.000162178	0.00424312
ENSMUSG00000006127	Inpp5k	1722.99	-0.919081	0.224996	-4.08487	4.41016e-05	0.00154421
ENSMUSG00000035824	Tk2	988.262	-0.92107	0.21852	-4.21503	2.49743e-05	0.000986249
ENSMUSG00000031802	Phxr4	659.721	-0.924056	0.195896	-4.71707	2.39266e-06	0.000147964
ENSMUSG00000056592	Zfp658	1404.11	-0.927458	0.26	-3.56715	0.00036088	0.00788719
ENSMUSG00000040270	Bach2	2034.61	-0.927924	0.207389	-4.47433	7.66528e-06	0.000389855
ENSMUSG00000028088	Fmo5	658.404	-0.928129	0.252401	-3.6772	0.000235812	0.00572044
ENSMUSG00000029385	Ccng2	5719.05	-0.92865	0.266194	-3.48862	0.000485514	0.00975813
ENSMUSG00000085118	NA	1010	-0.92968	0.227204	-4.09183	4.27977e-05	0.00150762
ENSMUSG00000031767	Nudt7	645.55	-0.932803	0.16767	-5.56331	2.64702e-08	3.75785e-06
ENSMUSG00000020696	Rffl	1873.36	-0.933754	0.237241	-3.93589	8.28903e-05	0.0024968
ENSMUSG00000055435	Maf	9130.02	-0.938036	0.170146	-5.51313	3.52502e-08	4.64109e-06
ENSMUSG00000042246	Tmc7	1273.45	-0.940159	0.186573	-5.03909	4.67751e-07	3.85682e-05
ENSMUSG00000029833	Trim24	1389.04	-0.942932	0.247864	-3.80424	0.000142243	0.00381322
ENSMUSG00000090622	A930033H14Rik	602.655	-0.943683	0.237636	-3.97113	7.15331e-05	0.00223298
ENSMUSG00000020593	Lpin1	1279.48	-0.946388	0.184527	-5.12873	2.91703e-07	2.69059e-05
ENSMUSG00000103321	NA	610.534	-0.947363	0.26949	-3.5154	0.000439099	0.00900701
ENSMUSG00000022106	Rcbtb2	4833.97	-0.949899	0.198953	-4.77448	1.8017e-06	0.000118212
ENSMUSG00000047180	Neurl3	2058.7	-0.950052	0.199913	-4.75232	2.01094e-06	0.000128747
ENSMUSG00000101823	NA	954.82	-0.950675	0.259088	-3.66931	0.000243206	0.00585631
ENSMUSG00000102732	NA	841.412	-0.955293	0.165138	-5.78483	7.2586e-09	1.31671e-06
ENSMUSG00000052534	Pbx1	886.237	-0.967732	0.223155	-4.33659	1.44708e-05	0.000661632
ENSMUSG00000084964	NA	4334.01	-0.971419	0.140015	-6.93795	3.97818e-12	1.70915e-09
ENSMUSG00000097750	NA	1329.5	-0.977169	0.148465	-6.58183	4.6468e-11	1.45892e-08
ENSMUSG00000035064	Eef2k	3636.05	-0.979345	0.230352	-4.25151	2.12335e-05	0.000866646
ENSMUSG00000029512	Ulk1	2145.43	-0.983932	0.236927	-4.1529	3.2829e-05	0.00122088
ENSMUSG00000051034	Zfp11	228.251	-0.987451	0.252478	-3.91103	9.19029e-05	0.00271813
ENSMUSG00000029714	Gigyf1	1484.56	-0.988864	0.196942	-5.02109	5.13783e-07	4.19401e-05
ENSMUSG00000022708	Zbtb20	5198.65	-0.993485	0.166114	-5.98073	2.22142e-09	4.96808e-07
ENSMUSG00000021200	Asb2	1135.27	-0.994457	0.211736	-4.69668	2.6443e-06	0.000161689
ENSMUSG00000039686	Zer1	1006	-0.994996	0.284875	-3.49274	0.000478089	0.00969599
ENSMUSG00000071064	Zfp827	734.11	-0.996004	0.200037	-4.9791	6.3881e-07	4.94275e-05
ENSMUSG00000028211	Trp53inp1	614.427	-0.999468	0.207137	-4.82515	1.39901e-06	9.6871e-05
ENSMUSG00000030930	Chst15	640.305	-0.999917	0.241954	-4.13268	3.58564e-05	0.00131263
ENSMUSG00000006850	Tmco6	682.751	-1.00258	0.25006	-4.00935	6.0887e-05	0.00196451
ENSMUSG00000050332	Amer1	592.335	-1.00282	0.215131	-4.66142	3.14039e-06	0.000186235
ENSMUSG00000038860	Garnl3	1116.45	-1.0163	0.211025	-4.81601	1.46457e-06	0.000100545
ENSMUSG00000027332	Ivd	932.254	-1.02637	0.232214	-4.41992	9.8738e-06	0.000479761
ENSMUSG00000064141	Zfp69	392.999	-1.03089	0.275396	-3.74331	0.000181613	0.00460104
ENSMUSG00000024055	Cyp4f13	2065.47	-1.04096	0.232478	-4.47768	7.54597e-06	0.000384986
ENSMUSG00000100627	NA	977.961	-1.04425	0.188113	-5.55122	2.83683e-08	3.95847e-06
ENSMUSG00000044072	Eml6	757.063	-1.05065	0.190078	-5.52746	3.249e-08	4.42026e-06
ENSMUSG00000031385	Plxnb3	249.642	-1.05784	0.265207	-3.98873	6.64268e-05	0.00210579
ENSMUSG00000022389	Tef	2220.5	-1.06058	0.30234	-3.50789	0.000451669	0.00920592
ENSMUSG00000021775	Nr1d2	1404.57	-1.06213	0.19635	-5.4094	6.3236e-08	7.5911e-06
ENSMUSG00000091908	NA	267.757	-1.06314	0.299177	-3.55354	0.000380082	0.00816475
ENSMUSG00000028976	Slc2a5	3666.3	-1.06788	0.186717	-5.71926	1.06986e-08	1.74666e-06
ENSMUSG00000069892	9930111J21Rik2	586.811	-1.07798	0.2864	-3.76389	0.000167291	0.00435596
ENSMUSG00000013646	Sh3bp5l	454.811	-1.0877	0.240191	-4.52848	5.94092e-06	0.000315082
ENSMUSG00000034652	Cd300a	1539.66	-1.09315	0.267841	-4.08135	4.47746e-05	0.00155527
ENSMUSG00000106847	Peg13	633.99	-1.09363	0.307025	-3.56204	0.000367987	0.00798903
ENSMUSG00000085227	6330418K02Rik	350.385	-1.09804	0.29432	-3.73076	0.000190906	0.0047792
ENSMUSG00000090185	NA	405.883	-1.1032	0.257745	-4.28022	1.86709e-05	0.000797962
ENSMUSG00000024534	Sncaip	738.231	-1.1099	0.197306	-5.62528	1.85206e-08	2.77402e-06
ENSMUSG00000022311	Csmd3	7183.94	-1.11505	0.211376	-5.2752	1.32608e-07	1.3878e-05
ENSMUSG00000072969	Armcx5	292.35	-1.12552	0.322329	-3.49185	0.000479695	0.0097114
ENSMUSG00000071669	Snx29	2243.44	-1.12886	0.219866	-5.13431	2.83182e-07	2.62683e-05
ENSMUSG00000045038	Prkce	680.72	-1.14599	0.300084	-3.81891	0.000134042	0.00363515
ENSMUSG00000025207	Sema4g	2105.41	-1.14733	0.240495	-4.77073	1.83563e-06	0.000119396
ENSMUSG00000006154	Eps8l1	559.89	-1.14978	0.263962	-4.35584	1.32557e-05	0.000615827
ENSMUSG00000024462	Gabbr1	2239.28	-1.15355	0.15648	-7.37182	1.68312e-13	1.09915e-10
ENSMUSG00000102277	NA	382.902	-1.15826	0.239416	-4.83787	1.31237e-06	9.23521e-05
ENSMUSG00000073412	Lst1	355.128	-1.15908	0.264024	-4.39005	1.13325e-05	0.00053783
ENSMUSG00000021983	Atp8a2	7326.5	-1.16431	0.156029	-7.46214	8.51255e-14	6.6179e-11
ENSMUSG00000072770	Acrbp	427.36	-1.1758	0.300762	-3.90939	9.25294e-05	0.00273171
ENSMUSG00000104145	NA	328.84	-1.1786	0.224046	-5.26052	1.43647e-07	1.48429e-05
ENSMUSG00000106543	NA	492.566	-1.17943	0.258391	-4.5645	5.00689e-06	0.000276157
ENSMUSG00000045519	Zfp560	412.122	-1.1815	0.254456	-4.64322	3.43014e-06	0.000200718
ENSMUSG00000023947	Nfkbie	800.497	-1.19018	0.309184	-3.84943	0.000118394	0.00325952
ENSMUSG00000060029	4930473A02Rik	138.015	-1.1904	0.307988	-3.86508	0.000111055	0.003126
ENSMUSG00000025375	Aatk	361.86	-1.1943	0.330125	-3.61773	0.000297197	0.0068921
ENSMUSG00000003949	Hlf	618.964	-1.20178	0.28949	-4.15139	3.30468e-05	0.00122619
ENSMUSG00000025993	Slc40a1	2568.93	-1.20346	0.182805	-6.58327	4.60209e-11	1.45892e-08
ENSMUSG00000078490	Cfap74	2028.61	-1.20498	0.24262	-4.96653	6.81615e-07	5.20002e-05
ENSMUSG00000006362	Cbfa2t3	1228.08	-1.21527	0.242957	-5.00199	5.67401e-07	4.568e-05
ENSMUSG00000056313	Tcim	433.44	-1.21668	0.28156	-4.32121	1.55179e-05	0.000694096
ENSMUSG00000052698	Tln2	2868.56	-1.2176	0.276805	-4.39876	1.08873e-05	0.000519792
ENSMUSG00000039759	Thap3	527.573	-1.23299	0.302413	-4.07717	4.55874e-05	0.00157017
ENSMUSG00000052676	Zmat1	247.749	-1.23827	0.315553	-3.92414	8.70403e-05	0.00258823
ENSMUSG00000034265	Zdhhc14	853.339	-1.23885	0.296107	-4.18378	2.86708e-05	0.00110396
ENSMUSG00000033174	Mgll	514.788	-1.25274	0.333164	-3.76014	0.000169821	0.00438687
ENSMUSG00000039137	Whrn	2489.93	-1.25527	0.221443	-5.6686	1.43971e-08	2.28202e-06
ENSMUSG00000086264	Gm15850	552.188	-1.27209	0.298129	-4.2669	1.98205e-05	0.000826852
ENSMUSG00000029510	Gpc2	374.403	-1.28056	0.29879	-4.28581	1.82071e-05	0.000786283
ENSMUSG00000056529	Ptafr	4056.19	-1.29745	0.271754	-4.77434	1.80294e-06	0.000118212
ENSMUSG00000021108	Prkch	1027.21	-1.29823	0.253842	-5.11435	3.14828e-07	2.85015e-05
ENSMUSG00000024193	Phf1	509.975	-1.30049	0.328423	-3.9598	7.50117e-05	0.00230629
ENSMUSG00000050855	Zfp940	169.983	-1.30807	0.356984	-3.66423	0.000248082	0.00595617
ENSMUSG00000028957	Per3	2520.09	-1.3125	0.203211	-6.4588	1.05536e-10	3.15617e-08
ENSMUSG00000039166	Akap7	280.452	-1.31627	0.343616	-3.83066	0.000127801	0.00347746
ENSMUSG00000061393	Acvr2b	915.724	-1.32466	0.267608	-4.94998	7.42192e-07	5.60973e-05
ENSMUSG00000035686	Thrsp	591.854	-1.34721	0.275493	-4.89018	1.00745e-06	7.3756e-05
ENSMUSG00000073590	NA	482.727	-1.37003	0.310881	-4.40691	1.04854e-05	0.000506462
ENSMUSG00000103230	NA	280.676	-1.3825	0.335713	-4.11809	3.82022e-05	0.00137984
ENSMUSG00000029343	Crybb1	1634.91	-1.4021	0.329769	-4.25177	2.12088e-05	0.000866646
ENSMUSG00000072618	Gm10384	303.524	-1.41078	0.405535	-3.47881	0.000503652	0.00996681
ENSMUSG00000026986	Hnmt	321.046	-1.4119	0.27883	-5.06366	4.11278e-07	3.49715e-05
ENSMUSG00000032609	Klhdc8b	908.731	-1.41512	0.365034	-3.87669	0.000105888	0.00301173
ENSMUSG00000086006	Gm13293	672.235	-1.41614	0.267918	-5.28572	1.25209e-07	1.33605e-05
ENSMUSG00000072720	Myo18b	320.818	-1.41614	0.330468	-4.28525	1.82532e-05	0.000786283
ENSMUSG00000019944	Rhobtb1	1255.43	-1.41717	0.329749	-4.29773	1.72556e-05	0.000756458
ENSMUSG00000075122	Cd80	527.376	-1.4271	0.3048	-4.68209	2.83968e-06	0.000171706
ENSMUSG00000102776	NA	219.514	-1.44448	0.353039	-4.09156	4.2848e-05	0.00150762
ENSMUSG00000083796	NA	188.375	-1.45002	0.318335	-4.55502	5.23814e-06	0.000286972
ENSMUSG00000104108	NA	540.783	-1.46738	0.325661	-4.50584	6.61118e-06	0.000345943
ENSMUSG00000108950	NA	459.113	-1.47006	0.309572	-4.74869	2.0474e-06	0.000130062
ENSMUSG00000039328	Rnf122	354.34	-1.47875	0.388477	-3.80655	0.00014092	0.00378398
ENSMUSG00000114864	NA	476.104	-1.50674	0.364081	-4.13846	3.4965e-05	0.00129149
ENSMUSG00000052942	Glis3	571.292	-1.51027	0.361442	-4.17847	2.9348e-05	0.00111948
ENSMUSG00000049538	Adamts16	842.081	-1.52516	0.219428	-6.9506	3.63743e-12	1.64145e-09
ENSMUSG00000042249	Grk3	916.932	-1.54185	0.283734	-5.43415	5.50591e-08	6.80981e-06
ENSMUSG00000107719	NA	59.348	-1.54332	0.437101	-3.53081	0.000414295	0.008705
ENSMUSG00000028654	Mycl	265.859	-1.55327	0.381141	-4.07532	4.59515e-05	0.00157938
ENSMUSG00000025092	Hspa12a	281.061	-1.57068	0.353266	-4.44617	8.74167e-06	0.000432668
ENSMUSG00000023826	Prkn	496.121	-1.58493	0.280912	-5.64208	1.68008e-08	2.56345e-06
ENSMUSG00000085912	Trp53cor1	366.495	-1.5891	0.284362	-5.58831	2.29286e-08	3.37236e-06
ENSMUSG00000020798	Spns3	239.904	-1.58967	0.330705	-4.80692	1.53275e-06	0.000104266
ENSMUSG00000104918	NA	554.12	-1.61488	0.45194	-3.57321	0.000352634	0.00777987
ENSMUSG00000079481	Nhsl2	855.995	-1.6208	0.298089	-5.43732	5.40889e-08	6.74088e-06
ENSMUSG00000022994	Adcy6	190.532	-1.64349	0.450863	-3.64522	0.000267163	0.00630303
ENSMUSG00000113856	Gm10790	1212.5	-1.66799	0.242336	-6.88299	5.86072e-12	2.39205e-09
ENSMUSG00000005951	Shpk	63.549	-1.6774	0.482085	-3.47947	0.000502412	0.00996644
ENSMUSG00000043795	Prr33	145.805	-1.706	0.48162	-3.54221	0.000396796	0.00843501
ENSMUSG00000021130	Galnt16	183.552	-1.70602	0.452436	-3.77075	0.000162757	0.00425148
ENSMUSG00000005043	Sgsh	329.298	-1.71321	0.331293	-5.17128	2.32498e-07	2.20684e-05
ENSMUSG00000087036	NA	54.7933	-1.7184	0.457156	-3.7589	0.000170663	0.00440165
ENSMUSG00000032489	Kif9	469.129	-1.72409	0.230125	-7.49197	6.78473e-14	5.53838e-11
ENSMUSG00000047146	Tet1	586.023	-1.73214	0.262796	-6.5912	4.36297e-11	1.45367e-08
ENSMUSG00000031210	Gpr165	1327.96	-1.7836	0.335408	-5.31771	1.0508e-07	1.17502e-05
ENSMUSG00000060212	Pcnx2	268.469	-1.83186	0.466281	-3.92865	8.54224e-05	0.0025503
ENSMUSG00000027233	Patl2	86.1512	-1.85273	0.45773	-4.04763	5.1738e-05	0.00172383
ENSMUSG00000031523	Dlc1	226.223	-1.90558	0.330315	-5.76899	7.97478e-09	1.41518e-06
ENSMUSG00000086938	4930481A15Rik	288.683	-1.9564	0.536172	-3.64883	0.000263433	0.00625117
ENSMUSG00000118619	NA	77.404	-2.00063	0.567909	-3.5228	0.000427021	0.00884713
ENSMUSG00000098620	NA	121.737	-2.00456	0.526567	-3.80684	0.000140756	0.00378398
ENSMUSG00000095891	NA	132.819	-2.01548	0.443655	-4.5429	5.54857e-06	0.00029864
ENSMUSG00000002771	Grin2d	59.2995	-2.04077	0.506928	-4.02575	5.67936e-05	0.00184336
ENSMUSG00000106856	NA	125.593	-2.05538	0.481761	-4.26639	1.98658e-05	0.000826852
ENSMUSG00000090584	NA	91.862	-2.12523	0.562405	-3.77882	0.000157571	0.00414251
ENSMUSG00000089035	NA	44.226	-2.1415	0.542122	-3.95022	7.80786e-05	0.00236514
ENSMUSG00000086119	NA	61.352	-2.15405	0.597871	-3.60287	0.000314727	0.00715632
ENSMUSG00000102674	8030442B05Rik	274.548	-2.15861	0.540541	-3.99342	6.51268e-05	0.00207263
ENSMUSG00000117698	BC037704	172.33	-2.15938	0.465498	-4.63885	3.50347e-06	0.000204278
ENSMUSG00000110997	NA	68.4145	-2.2416	0.469394	-4.77553	1.79236e-06	0.000118212
ENSMUSG00000075015	NA	528.789	-2.29893	0.364504	-6.30701	2.84481e-10	7.61383e-08
ENSMUSG00000097768	NA	51.657	-2.3061	0.656366	-3.51344	0.000442342	0.00904972
ENSMUSG00000038451	Spsb2	101.759	-2.32362	0.551833	-4.21073	2.54552e-05	0.000998996
ENSMUSG00000103223	NA	726.113	-2.34638	0.317231	-7.39645	1.39873e-13	9.92856e-11
ENSMUSG00000024901	Peli3	66.3495	-2.35467	0.58323	-4.0373	5.40705e-05	0.0017726
ENSMUSG00000075014	NA	2278.63	-2.37222	0.303966	-7.80423	5.98639e-15	6.98098e-12
ENSMUSG00000109684	NA	83.0745	-2.43078	0.647282	-3.75537	0.000173084	0.00444798
ENSMUSG00000022240	Ctnnd2	261.334	-2.54327	0.366073	-6.94743	3.72006e-12	1.64145e-09
ENSMUSG00000091028	NA	26.8935	-2.57536	0.684783	-3.76084	0.000169345	0.00438151
ENSMUSG00000059824	Dbp	191.51	-2.64258	0.663947	-3.98011	6.88847e-05	0.00217273
ENSMUSG00000102562	NA	78.1293	-2.64492	0.592581	-4.46339	8.06721e-06	0.000405247
ENSMUSG00000039958	Etfbkmt	68.1896	-2.66432	0.585626	-4.54953	5.37648e-06	0.000291616
ENSMUSG00000095280	NA	82.3129	-2.66667	0.496575	-5.37012	7.86842e-08	9.11063e-06
ENSMUSG00000104271	NA	31.5876	-2.69878	0.760681	-3.54785	0.000388388	0.00829951
ENSMUSG00000029682	Spam1	28.0032	-2.76958	0.715049	-3.87328	0.00010738	0.00304356
ENSMUSG00000038026	Kcnj9	110.306	-2.85692	0.578536	-4.93818	7.88535e-07	5.90533e-05
ENSMUSG00000071226	Cecr2	123.522	-2.89085	0.743894	-3.88611	0.000101864	0.0029415
ENSMUSG00000022441	Efcab6	35.9927	-2.90348	0.700911	-4.14244	3.43635e-05	0.00127215
ENSMUSG00000043664	Tmem221	67.8887	-2.93675	0.660528	-4.44607	8.74559e-06	0.000432668
ENSMUSG00000030413	Pglyrp1	24.7862	-3.19407	0.892751	-3.57778	0.000346522	0.00766575
ENSMUSG00000109555	NA	153.064	-3.40337	0.602023	-5.65323	1.57465e-08	2.42525e-06
ENSMUSG00000006457	Actn3	55.4308	-3.63857	0.670392	-5.42753	5.71395e-08	6.96164e-06
ENSMUSG00000107340	NA	29.0855	-3.69733	0.993183	-3.72271	0.000197096	0.00488284
ENSMUSG00000040037	Negr1	42.1555	-3.91934	1.04165	-3.76262	0.00016814	0.00437111
ENSMUSG00000025746	Il6	48.7187	-3.99767	0.700785	-5.70456	1.16644e-08	1.88548e-06
ENSMUSG00000112309	NA	31.2281	-4.12296	1.1744	-3.51068	0.000446956	0.00912126
ENSMUSG00000026604	Ptpn14	55.4071	-4.22894	1.2153	-3.47975	0.000501878	0.00996644
ENSMUSG00000113216	NA	169.809	-4.61294	0.649111	-7.10655	1.18976e-12	6.26583e-10
ENSMUSG00000027376	Prom2	42.5316	-4.6585	1.01232	-4.60181	4.18841e-06	0.00023743
ENSMUSG00000040896	Kcnd3	39.9765	-4.93877	0.999288	-4.94229	7.72118e-07	5.80903e-05
ENSMUSG00000059742	Kcnh7	35.1574	-5.11248	1.42124	-3.59719	0.000321675	0.00726171
ENSMUSG00000040489	Sox30	18.0769	-5.55936	1.5571	-3.57033	0.000356538	0.00783719
ENSMUSG00000022619	Mapk8ip2	20.6026	-6.28493	1.67371	-3.75509	0.000173277	0.00444798
ENSMUSG00000057072	Spata45	21.5977	-6.33741	1.52503	-4.1556	3.24436e-05	0.00121207
ENSMUSG00000001930	Vwf	21.4474	-6.35163	1.63738	-3.87915	0.000104822	0.00298661
ENSMUSG00000046958	NA	16.9617	-6.75914	1.82933	-3.69488	0.000219991	0.00538466
ENSMUSG00000041828	Abca8a	18.2651	-6.86441	1.5663	-4.38257	1.17287e-05	0.00055502
ENSMUSG00000000359	Rem1	28.7161	-7.52179	1.95921	-3.83919	0.00012344	0.00337569
ENSMUSG00000053977	Cd8a	18.0681	-7.58411	1.85523	-4.08795	4.35199e-05	0.00152797
ENSMUSG00000112794	NA	19.0151	-7.65949	2.07187	-3.6969	0.000218246	0.00534998
ENSMUSG00000074715	Ccl28	27.2204	-8.1726	1.84408	-4.4318	9.34489e-06	0.000456781
ENSMUSG00000097693	4930471M09Rik	30.1192	-8.31945	1.79708	-4.62942	3.66697e-06	0.000211544
ENSMUSG00000086503	Xist	48999.6	-9.72661	0.187827	-51.785	0	0

## Sheet: MaleControlvsFemaleControl
Ensembl_ID	Gene_ID	baseMean	log2FoldChange	lfcSE	stat	pvalue	padj
ENSMUSG00000069045	Ddx3y	707.634	10.4878	0.78374	13.3817	7.7372e-41	2.86741e-37
ENSMUSG00000069049	Eif2s3y	650.057	9.76322	0.679791	14.3621	8.94868e-47	4.14548e-43
ENSMUSG00000068457	Uty	549.428	8.93572	0.584401	15.2904	8.86412e-53	5.47507e-49
ENSMUSG00000058794	Nfe2	26.288	8.16024	1.81876	4.48672	7.23293e-06	0.00268052
ENSMUSG00000056673	Kdm5d	1304.1	7.84621	0.376591	20.8348	2.09318e-96	1.93933e-92
ENSMUSG00000099809	NA	12.4177	7.0851	1.63526	4.33271	1.47287e-05	0.00454872
ENSMUSG00000101059	NA	16.8384	6.78404	1.65431	4.10083	4.11666e-05	0.00897432
ENSMUSG00000115357	NA	52.4445	6.67719	1.58079	4.22396	2.40046e-05	0.00638048
ENSMUSG00000045382	Cxcr4	40.6189	6.07345	1.48894	4.07906	4.5219e-05	0.00974312
ENSMUSG00000108584	NA	59.6913	4.79695	0.990486	4.84303	1.27876e-06	0.000696923
ENSMUSG00000100815	NA	74.5487	4.61313	0.710174	6.49578	8.26052e-11	2.55112e-07
ENSMUSG00000052852	Reep1	83.3721	4.40069	0.801752	5.48884	4.04582e-08	5.35493e-05
ENSMUSG00000118160	NA	59.7329	3.94989	0.758219	5.20943	1.89422e-07	0.000152608
ENSMUSG00000057246	BC051142	56.0864	3.84451	0.868085	4.42873	9.47907e-06	0.00329506
ENSMUSG00000051499	Zfp786	54.5551	3.6537	0.775087	4.71392	2.42994e-06	0.00118492
ENSMUSG00000112352	NA	43.4325	3.18877	0.746082	4.27402	1.91976e-05	0.00570526
ENSMUSG00000091438	NA	171.382	2.92454	0.656829	4.45252	8.48695e-06	0.00302429
ENSMUSG00000020328	Nudcd2	142.958	2.18372	0.499257	4.37395	1.2202e-05	0.00396674
ENSMUSG00000038206	Fbxo8	1243.84	2.18082	0.516607	4.22143	2.42763e-05	0.00638048
ENSMUSG00000117294	NA	591.994	2.16226	0.468818	4.61215	3.98529e-06	0.00180116
ENSMUSG00000024222	Fkbp5	3097.92	1.90694	0.294963	6.46501	1.01289e-10	2.68126e-07
ENSMUSG00000085363	NA	474.189	1.69419	0.409404	4.13819	3.50063e-05	0.00810834
ENSMUSG00000060739	Nsa2	302.445	1.31001	0.270073	4.85059	1.23096e-06	0.000691202
ENSMUSG00000020893	Per1	1739.38	1.28847	0.265498	4.85304	1.2158e-06	0.000691202
ENSMUSG00000096992	NA	880.854	1.24285	0.224814	5.52832	3.23311e-08	4.60843e-05
ENSMUSG00000014905	Dnajb9	1151.92	1.22746	0.224608	5.46489	4.63192e-08	5.72197e-05
ENSMUSG00000034165	Ccnd3	2173.38	1.20996	0.215557	5.6132	1.98621e-08	3.06704e-05
ENSMUSG00000064061	Dzip3	913.858	1.18078	0.258533	4.56725	4.94174e-06	0.00212955
ENSMUSG00000031604	Msmo1	531.518	1.17543	0.266708	4.40718	1.04723e-05	0.00346522
ENSMUSG00000108394	NA	1087.64	1.17285	0.23121	5.07265	3.92319e-07	0.000269247
ENSMUSG00000104358	NA	833.872	1.05404	0.224357	4.69804	2.62676e-06	0.00124534
ENSMUSG00000024766	Lipo3	300.117	0.995069	0.191362	5.19992	1.99377e-07	0.000153936
ENSMUSG00000024561	Mbd1	1929.47	0.948089	0.223443	4.24309	2.20459e-05	0.00626744
ENSMUSG00000013663	Pten	8102.75	0.901249	0.21098	4.27172	1.93973e-05	0.00570526
ENSMUSG00000029676	Pot1a	1468.2	0.862045	0.15971	5.39758	6.75461e-08	7.36252e-05
ENSMUSG00000024120	Lrpprc	1822.33	0.857105	0.191356	4.47912	7.495e-06	0.00272318
ENSMUSG00000026775	Yme1l1	2621.29	0.856641	0.197572	4.33584	1.45205e-05	0.00454872
ENSMUSG00000021938	Pspc1	1519.2	0.846363	0.202398	4.18167	2.89371e-05	0.00720171
ENSMUSG00000039782	Cpeb2	3413.17	0.83488	0.164317	5.08092	3.75607e-07	0.000267692
ENSMUSG00000020720	Psmd12	1125.44	0.812458	0.17311	4.69331	2.68826e-06	0.00124534
ENSMUSG00000032252	Glce	603.093	0.811754	0.150122	5.40731	6.39798e-08	7.36252e-05
ENSMUSG00000021936	Mapk8	1187.71	0.794142	0.163071	4.86991	1.11648e-06	0.000667365
ENSMUSG00000038342	Mlxip	5451.11	0.78391	0.174121	4.5021	6.7285e-06	0.00256701
ENSMUSG00000017057	Il13ra1	4114.73	0.779843	0.172404	4.52334	6.08716e-06	0.00250656
ENSMUSG00000109245	NA	8712.14	0.727171	0.142524	5.10211	3.35888e-07	0.00024896
ENSMUSG00000005360	Slc1a3	2428.44	0.656661	0.158935	4.13164	3.60188e-05	0.00823986
ENSMUSG00000022789	Dnm1l	1408.82	0.654841	0.144331	4.53709	5.7037e-06	0.00240203
ENSMUSG00000109539	NA	3055.34	0.652189	0.150015	4.34751	1.37694e-05	0.00439909
ENSMUSG00000054604	Cggbp1	2201.87	0.617665	0.145897	4.23358	2.29998e-05	0.00626744
ENSMUSG00000039531	Zup1	3407.34	0.589408	0.14333	4.11223	3.91851e-05	0.00874818
ENSMUSG00000030016	Zfp638	4719.97	0.482189	0.111823	4.31206	1.61742e-05	0.00491323
ENSMUSG00000096606	Tpbgl	1638.04	-0.473051	0.112102	-4.21984	2.44476e-05	0.00638048
ENSMUSG00000031838	Ifi30	1794.31	-0.508029	0.102063	-4.97759	6.43793e-07	0.000411361
ENSMUSG00000037936	Scarb1	982.559	-0.808565	0.19363	-4.17582	2.96914e-05	0.00720171
ENSMUSG00000041607	Mbp	972.795	-0.909977	0.21485	-4.2354	2.2815e-05	0.00626744
ENSMUSG00000008855	Hdac5	2920.81	-1.00583	0.23914	-4.20601	2.59918e-05	0.00668928
ENSMUSG00000062115	Rai1	1925.58	-1.07926	0.181458	-5.94773	2.71879e-09	5.59769e-06
ENSMUSG00000029547	Ints1	1102.48	-1.09115	0.246536	-4.42594	9.60245e-06	0.00329506
ENSMUSG00000039157	Fam102a	751.955	-1.1206	0.208674	-5.37009	7.86994e-08	8.10167e-05
ENSMUSG00000026956	Uap1l1	1138.23	-1.15703	0.272113	-4.25204	2.11831e-05	0.00613318
ENSMUSG00000046718	Bst2	319.675	-1.26113	0.306539	-4.1141	3.88701e-05	0.00874818
ENSMUSG00000027510	Rbm38	740.53	-1.26121	0.236187	-5.33987	9.30154e-08	8.61788e-05
ENSMUSG00000028042	Zbtb7b	1218.56	-1.29447	0.271706	-4.76422	1.89588e-06	0.000949477
ENSMUSG00000064215	Ifi27	796.5	-1.30658	0.229674	-5.68886	1.27892e-08	2.36984e-05
ENSMUSG00000018740	Slc25a35	240.142	-1.44927	0.302285	-4.79438	1.63178e-06	0.000839914
ENSMUSG00000065979	Cpped1	468.883	-1.504	0.333379	-4.51139	6.44031e-06	0.00256701
ENSMUSG00000105748	NA	215.119	-1.58624	0.379493	-4.17989	2.91656e-05	0.00720171
ENSMUSG00000042606	Hirip3	323.764	-1.63651	0.36365	-4.50023	6.78811e-06	0.00256701
ENSMUSG00000001473	Tubb6	133.88	-1.86784	0.440743	-4.23793	2.25588e-05	0.00626744
ENSMUSG00000052566	Hook2	132.546	-2.08445	0.496335	-4.19968	2.67287e-05	0.00678471
ENSMUSG00000027254	Map1a	63.1073	-3.05696	0.572005	-5.34429	9.07727e-08	8.61788e-05
ENSMUSG00000059323	Tonsl	111.776	-3.54629	0.739149	-4.7978	1.6042e-06	0.000839914
ENSMUSG00000030098	Grip2	46.0469	-3.9303	0.948521	-4.14361	3.41875e-05	0.00801892
ENSMUSG00000050762	Prss27	89.7554	-4.31009	0.863384	-4.99209	5.973e-07	0.000395284
ENSMUSG00000035863	Palm	43.6075	-4.7458	0.961634	-4.93514	8.00936e-07	0.000494711
ENSMUSG00000021118	Plek2	26.1499	-4.98543	0.955235	-5.21906	1.79833e-07	0.000151468
ENSMUSG00000108693	NA	129.115	-5.12074	1.2319	-4.15677	3.22785e-05	0.0076682
ENSMUSG00000100154	NA	25.4006	-5.27945	1.14648	-4.60494	4.12593e-06	0.00182032
ENSMUSG00000044923	Olfr1030	40.8473	-6.06474	1.37173	-4.42123	9.8141e-06	0.00330646
ENSMUSG00000039021	Ttc16	25.177	-6.07815	1.34884	-4.50622	6.59929e-06	0.00256701
ENSMUSG00000030752	Kdm8	40.0443	-6.15887	0.981098	-6.27753	3.44e-10	7.9679e-07
ENSMUSG00000006269	Atp6v1b1	15.2517	-6.70459	1.63423	-4.10259	4.08552e-05	0.00897432
ENSMUSG00000075254	Heg1	143.169	-6.78981	1.20122	-5.65244	1.58189e-08	2.66476e-05
ENSMUSG00000001930	Vwf	73.3444	-7.08414	1.35513	-5.22766	1.71664e-07	0.000151468
ENSMUSG00000086506	NA	13.9405	-7.29758	1.74833	-4.17403	2.99262e-05	0.00720171
ENSMUSG00000086503	Xist	47717.1	-9.32557	0.258205	-36.1169	1.22951e-285	2.27829e-281
