# Supplementary material for: Regulatory T-cells inhibit microglia-induced pain hypersensitivity in female mice
Source: eLife. 2021 Oct 15;10:e69056. doi: 10.7554/eLife.69056 (PMC8639143; doi:10.7554/eLife.69056)
Supplement: Supplementary file 2. [file elife-69056-supp2.xlsx]

## Sheet: Sheet1
		Male Control				Male CSF1				Female Control				Female CSF1
Ensembl ID	Gene Name	Sample 1	Sample 2	Sample 4	Sample 40	Sample 6	Sample 7	Sample 8	Sample 9	Sample 12	Sample 13	Sample 14	Sample 15	Sample 17	Sample 19	Sample 20
ENSMUSG00000000001	Gnai3	4.90818	10.351	10.9304	8.1605	10.2018	10.6158	10.88	8.8302	9.51418	7.95724	6.99752	7.41876	8.43186	7.82867	6.47837
ENSMUSG00000000003	Pbsn	0	0	0	0	0	0	0	0	0	0	0	0	0	0	0.0548619
ENSMUSG00000000028	Cdc45	0	0	0	0	1.69391	3.13559	0	4.88039	0	0	0	0	0	0	0
ENSMUSG00000000031	H19	0	0	0	0	0	0	0	0	0	0	0	0	0	0	0
ENSMUSG00000000037	Scml2	0	0	0	0.00391754	0.0184919	0	0	0.0344488	0.0520242	0	0	0.00553044	0	0.0465679	0.00549093
ENSMUSG00000000049	Apoh	0	0	0	0	0	0	0	0	0	0	0	0	0	0	0
ENSMUSG00000000056	Narf	7.06033	4.53856	6.82613	3.7807	3.45812	9.4211	11.5094	10.3051	6.66795	9.66657	5.61316	7.50562	16.096	4.89891	10.6408
ENSMUSG00000000058	Cav2	0.0732049	0.433216	1.02116	0.389516	0.654742	0.0569525	0.0184483	0.212758	0.973361	0.883232	0.589161	1.51586	0.206023	0.406935	0.479861
ENSMUSG00000000078	Klf6	16.2905	18.383	22.7853	18.7912	20.5207	20.5289	20.3838	19.7233	21.6816	18.3063	19.6812	16.8251	15.1093	16.1022	17.2796
ENSMUSG00000000085	Scmh1	13.2499	7.54843	15.5564	19.9372	9.37002	16.7456	11.2899	12.8671	8.07034	12.905	10.0843	11.3475	13.3446	15.5548	10.9702
ENSMUSG00000000088	Cox5a	0	0	5.61287	6.77382	10.8259	6.01487	6.69186	12.3981	5.00413	3.15239	7.06473	0	4.28882	5.32771	4.62532
ENSMUSG00000000093	Tbx2	0	0	0	0.116887	0	0	0	0	0	0.0201782	0.00406508	0	0.00396591	0.0173139	0.0268975
ENSMUSG00000000094	Tbx4	0	0	0	0	0	0	0	0	0	0	0	0	0	0	0
ENSMUSG00000000103	Zfy2	0	0	0	0	0	0	0	0	0	0	0	0	0	0	0
ENSMUSG00000000120	Ngfr	0	0	0	0	0	0	0	0	0	0	0	0	0	0	0
ENSMUSG00000000125	Wnt3	0	0.00618204	0	0	0.0311003	0.0131783	0.0348394	0	0	0.0596195	1.14756	0.0354067	0.015995	0.0127694	0
ENSMUSG00000000126	Wnt9a	0	0	0	0	0	0.0125992	0	0	0	0	0	0	0	0	0
ENSMUSG00000000127	Fer	5.18352	3.5992	5.91519	5.79579	3.3475	3.22012	3.34676	3.70094	4.47481	3.23592	4.61576	4.30221	5.15911	3.84936	3.07009
ENSMUSG00000000131	Xpo6	44.3149	15.0942	19.352	7.72674	11.8053	14.8063	12.5551	10.3168	8.67675	19.5258	16.6641	8.88475	10.1572	8.81819	9.51783
ENSMUSG00000000134	Tfe3	14.8889	10.4996	14.703	9.57336	17.6005	18.1277	11.2221	8.41398	20.8907	11.1254	14.4778	19.4401	21.753	15.581	15.6827
ENSMUSG00000000142	Axin2	0.083067	0	0	0	0.0996292	0	0	0.00559947	0	0.434559	0.0987581	0	0.44017	0.0251427	0
ENSMUSG00000000148	Brat1	4.75505	1.07684	4.04788	3.2425	2.50681	3.56915	3.04059	2.79474	2.45064	2.56495	3.20554	1.87393	2.16577	2.52089	1.90851
ENSMUSG00000000149	Gna12	13.918	20.4877	23.6848	17.0682	22.9355	27.8511	23.4928	16.7474	27.5152	21.1326	17.1671	23.3757	24.1401	24.8017	24.5074
ENSMUSG00000000154	Slc22a18	0	0	0.108045	0.107868	0.229634	0	0.909792	0	0	0.841195	0	0.468891	0	0.0850165	0
ENSMUSG00000000157	Itgb2l	0	0	0	0	0	0	0	0	0	0	0	0	0	0	0
ENSMUSG00000000159	Igsf5	0	0	0	0	0	0	0	0	0	0	0	0	0	0	0
ENSMUSG00000000167	Pih1d2	0	0	0	0	0	0	0	0	0	0	0	0	0	0	0
ENSMUSG00000000168	Dlat	3.94833	3.45094	3.27731	2.2842	3.54731	5.16073	2.3968	2.57342	2.66418	2.66568	2.40793	2.55228	2.7399	2.32389	2.47228
ENSMUSG00000000171	Sdhd	5.8919	2.09247	6.69544	9.42849	12.0638	18.942	4.17492	15.4921	8.6189	8.15904	4.55757	10.9218	6.81936	8.92245	11.5844
ENSMUSG00000000182	Fgf23	0.00915715	0	0	0	0	0	0	0	0	0	0	0	0	0	0
ENSMUSG00000000183	Fgf6	0.00900449	0	0	0.00268635	0.0126307	0	0	0	0	0	0	0.00364108	0	0.00258163	0.00375286
ENSMUSG00000000184	Ccnd2	0	0	0.00122329	0.00771217	0.0771852	0.233804	0.299734	0.00676968	0.194844	0.00987748	0	0	0.017702	0.0123943	0.0801438
ENSMUSG00000000194	Gpr107	10.9501	7.24754	6.32234	11.0618	10.1837	6.37111	13.5105	8.12343	7.76328	11.5905	8.97336	11.9269	6.76623	8.36063	11.2753
ENSMUSG00000000197	Nalcn	0	0	0.0190522	0	0.171296	0	0.00614029	0.00589299	0	0.00642832	0	0	0.0301153	0.00489575	0.0221419
ENSMUSG00000000202	Btbd17	0	0	0	0	0.093242	0	0	0	0.142025	0	0	0.0572701	0.026654	0.0143891	0.0466226
ENSMUSG00000000204	Slfn4	0	0	0.00415921	0	0	0	0	0.00573028	0	0	0	0	0	0.00649944	0
ENSMUSG00000000214	Th	0	0	0	0	0	0	0	0	0	0	0	0	0	0	0
ENSMUSG00000000215	Ins2	0	0	0	0	0	0	0	0	0	0	0	0	0	0	0
ENSMUSG00000000216	Scnn1g	0	0.0349732	0	0	0	0	0	0	0	0	0	0	0	0.0434989	0
ENSMUSG00000000223	Drp2	0	0	0.00610751	0	0	0.0404028	0	0.0291974	0	0	0	0.00235228	0.0881441	0.00332567	0.00134077
ENSMUSG00000000244	Tspan32	0.52238	1.79373	0.788429	1.24142	4.30216	6.94583	12.4219	4.70501	0.188022	2.6681	2.41711	2.38804	2.82906	3.48794	6.24476
ENSMUSG00000000247	Lhx2	0	0	0	0	0	0	0	0	0	0	0	0	0	0	0.00241699
ENSMUSG00000000248	Clec2g	0	0	0	0	0	1.62661	0	0	0	0	0	0	0	0.0373621	0.00902692
ENSMUSG00000000253	Gmpr	0	3.83806	0	0	4.56637	5.05502	3.6059	3.96877	0	5.27534	0	0	0	0	4.49917
ENSMUSG00000000263	Glra1	0.0428212	0	0.00945382	0	0.00830261	0	0.0213601	0.00969503	0	0.0207033	0	0	0	0.0181639	0
ENSMUSG00000000266	Mid2	0	0	0.00477305	0	0.0369666	0.0391757	0	0	0.0226672	0	0	0	0	0.00946187	0
ENSMUSG00000000275	Trim25	8.856	2.70794	6.75905	6.69179	7.52112	6.28508	6.93329	5.05421	4.03141	5.44578	4.43493	6.10826	5.02393	5.23723	5.65822
ENSMUSG00000000276	Dgke	0.220037	0.332611	1.00211	0.21664	0.553835	0.230039	0.144976	0.812106	0.258497	0.843226	1.37799	0.915329	0.227547	0.438155	0.621307
ENSMUSG00000000278	Scpep1	9.87615	4.54888	16.946	11.3725	19.8902	15.9648	12.7414	16.8005	8.47277	7.63843	10.0749	9.88301	13.3527	17.855	12.3544
ENSMUSG00000000282	Mnt	2.83514	5.95415	4.09563	5.2882	3.3653	3.56876	1.66891	2.92894	8.24227	4.50594	3.42972	5.87167	6.16259	5.30715	3.97622
ENSMUSG00000000290	Itgb2	48.1453	48.2319	48.0376	47.911	85.1293	76.006	81.3485	86.1698	63.3798	53.4692	64.1706	53.2802	58.2167	59.9834	62.5135
ENSMUSG00000000295	Hddc2	0.141231	0.0999697	0.649054	0.0615489	2.32657	1.13448	1.15446	1.01101	1.19473	0.843935	1.02502	1.16731	1.63768	0.625685	1.17093
ENSMUSG00000000296	Tpd52l1	0	0	0.216409	0	0.0538954	0	0.0623519	0	0	0	0	0	0	0	0.00690667
ENSMUSG00000000301	Pemt	0	0	0.0973748	0.172056	0.0861285	0.239391	0.401962	0.0720305	0	0	0	0	0.586098	0.111994	0.0684442
ENSMUSG00000000303	Cdh1	0.00969719	0.0677385	0.0639925	0.00844329	0.00987745	0.0111612	0.0198521	0.00994764	0.0247544	0.0250036	0.0466358	0.0113528	0.0153277	0.005417	0.0195558
ENSMUSG00000000305	Cdh4	0	0	0	0	0	0.0119797	0	0.0145751	0	0.00193614	0.00180331	0	0	0.0369494	0
ENSMUSG00000000308	Ckmt1	0	0	0	0	0.192605	0.0257544	0	0	0	0	0	0	0	0.0980947	0.0247878
ENSMUSG00000000317	Bcl6b	0.672875	5.5838	0.84659	0.748064	0.426717	0.785938	0.400098	0.175554	0.960275	1.47808	1.20661	1.46254	0.792306	1.20937	1.02034
ENSMUSG00000000318	Clec10a	0	0	0	0	0	0	0	0	0	0	0	0	0.0342874	0.0200155	0
ENSMUSG00000000320	Alox12	1.59316	0.0372533	0.334625	1.08529	0.601897	0.37582	0.228224	0.60259	0.662031	0.564116	0.0502027	0.71467	0.514572	0.462928	0.644858
ENSMUSG00000000325	Arvcf	8.31793	0	4.74563	5.20553	0	0	0	0	5.55012	5.0125	5.25954	6.12692	9.36011	0	0
ENSMUSG00000000326	Comt	50.9116	53.7318	31.9283	55.7169	79.93	51.636	45.3868	67.3102	65.8454	48.849	47.5221	58.1199	62.2706	53.9535	58.1171
ENSMUSG00000000339	Rtca	15.255	3.83932	6.66609	3.41339	4.6495	1.82636	9.79803	4.02331	2.28236	4.36301	2.09972	3.08577	1.99503	3.73187	3.34421
ENSMUSG00000000340	Dbt	0.747239	0.849987	6.63907	2.26424	2.54713	3.19508	2.43905	1.36616	4.64512	3.58892	1.6931	2.66255	2.04406	5.75748	1.80334
ENSMUSG00000000346	Dazap2	25.213	35.341	28.4187	27.6159	40.3692	35.5711	35.7755	36.9549	33.929	25.4926	37.478	36.1257	34.9615	32.1823	29.7395
ENSMUSG00000000355	Mcts1	9.4508	15.2121	13.0844	7.77161	9.15456	8.4866	10.4944	8.09519	8.93724	12.3933	7.64963	7.99497	10.7428	8.75841	10.9847
ENSMUSG00000000359	Rem1	0	0	0	0	0.0111096	0	0	0	0.0118988	0.0182138	0.265021	0	1.14904	0	0.653841
ENSMUSG00000000365	Rnf17	1.00289	0.375994	0.520546	1.65903	0.148012	0.567622	0.749718	0.757134	1.07607	2.351	0.0506342	1.31327	0.88063	1.49741	0.802809
ENSMUSG00000000374	Trappc10	8.88254	4.99774	5.5081	3.17129	6.53644	4.3513	5.67459	4.63083	3.68979	4.4341	5.12862	5.02117	4.51799	5.85634	5.20143
ENSMUSG00000000378	Ccm2	5.0645	4.30082	9.0343	13.2843	7.2517	11.9437	5.88168	8.38036	10.4137	11.1823	8.42614	12.8143	7.94372	12.3143	7.72488
ENSMUSG00000000381	Wap	0	0	0	0	0	0	0	0.424608	0	0	0	0	0	0.143381	0
ENSMUSG00000000384	Tbrg4	3.86358	2.78815	2.39697	7.5945	7.75693	6.49917	9.9827	14.1014	7.55107	10.5004	8.55463	3.96653	5.23634	3.40024	5.30504
ENSMUSG00000000385	Tmprss2	0	0.0169813	0.0968796	0.123002	0.153346	0.0284636	0.0163917	0.0793527	0.25483	0.16307	0.0528244	0.0218969	0.0222352	0.341514	0.331859
ENSMUSG00000000386	Mx1	0.32747	0.833229	0.560853	0.349606	3.30519	1.80908	1.22157	1.40396	0.882828	0.608183	0.399949	0.775924	1.74682	1.56788	4.83751
ENSMUSG00000000392	Fap	0.0158729	0.371248	0.0123336	0.0523049	0.0822432	0.00815171	0.232857	0.0431359	0.0375807	0.326827	0.00919832	0.340714	0.0572666	0.0745766	0.00513969
ENSMUSG00000000394	Gcg	0	0	0	0	0	0	0	0	0	0	0	0	0	0.0393142	0
ENSMUSG00000000399	Ndufa9	9.09906	6.99634	9.65515	11.2788	16.1257	11.8713	7.95911	6.93849	12.0513	7.18026	13.4198	14.1831	10.3444	9.9627	10.0381
ENSMUSG00000000402	Egfl6	0	0	0	0	0	0	0	0	0.0573291	0	0	0.0188159	0	0	0
ENSMUSG00000000409	Lck	0	0	0.167135	1.19673	0	0.304663	0	0.0114815	0.36447	0.0853678	0.0309643	0.17964	0.0604448	0.333728	0.314926
ENSMUSG00000000411	Tssk3	0	0	0.0363163	0.241428	0	0	0	0	0.248043	0.0300681	0	0.264668	0.37192	0.222926	0.0584338
ENSMUSG00000000416	Cttnbp2	0	0	0	0.25623	0	0	0	0.0418926	0.00392229	0	0	0.00423937	0.00262609	0	0.0141878
ENSMUSG00000000420	Galnt1	10.2256	10.0737	25.9354	9.46547	13.6046	11.8462	12.7237	14.4095	10.0335	10.5727	8.58485	10.3343	9.75967	12.7742	12.2702
ENSMUSG00000000435	Myf5	0	0	0	0	0	0	0	0	0	0	0	0	0	0	0
ENSMUSG00000000439	Mkrn2	1.78384	4.58159	1.40901	3.6644	2.67831	1.93767	3.56004	3.07395	1.72856	1.79929	2.17568	3.16351	3.43851	2.63391	2.24132
ENSMUSG00000000440	Pparg	0	0	0	0	0.0137673	0	0	0	0	0	0	0	0	0	0
ENSMUSG00000000441	Raf1	11.3142	9.34508	20.4854	9.17591	9.30114	11.0336	13.4171	7.86268	12.5602	12.4387	21.774	10.5662	10.6329	10.7877	10.8113
ENSMUSG00000000486	Sept1	0.810948	0	0	0	0	0	0	0	0	0	0	0	0	0	0
ENSMUSG00000000489	Pdgfb	17.3813	11.6823	12.8286	15.8962	13.2634	13.1835	18.2262	16.1212	19.2025	12.3968	19.327	17.9862	20.4108	15.1317	16.6967
ENSMUSG00000000530	Acvrl1	3.03722	3.77084	2.37757	3.53209	5.19596	4.15617	3.96339	3.08406	2.74102	3.45036	1.46528	1.79408	3.92672	2.27329	2.25814
ENSMUSG00000000531	Grasp	0	0	0.0175073	0	0.190546	0.536306	0.215222	0.0294711	0.184354	0.0569851	0	0.0401893	0.0416701	0.0151958	0.0251384
ENSMUSG00000000532	Acvr1b	0.820364	5.61207	5.23817	5.70503	4.63275	3.82926	6.97519	4.1269	4.00514	4.16113	3.44759	2.92783	4.72566	4.64304	4.57201
ENSMUSG00000000538	Tom1l2	3.93752	4.56437	5.05648	6.34347	4.4033	3.11267	13.8715	2.76114	15.5366	6.12843	6.13551	6.68329	8.86191	10.6721	9.16981
ENSMUSG00000000544	Gpa33	0	0	0	0	0.0370703	0.0275413	0	0	0.104007	0	0.367017	0.0371955	5.55389	0.0252807	0.285917
ENSMUSG00000000552	Zfp385a	29.479	12.6704	17.8933	20.3664	15.6593	15.5897	13.2523	13.7178	21.3402	20.638	19.6247	21.5505	18.0655	16.7974	16.8116
ENSMUSG00000000555	Itga5	2.74132	1.8011	3.26369	2.75436	8.26709	5.98353	9.79562	5.43803	2.35698	2.49332	2.68933	2.35432	2.52868	2.69898	3.80785
ENSMUSG00000000560	Gabra2	0	0	0.00352791	0	0.00335877	0.0057345	0.00304384	0.00998567	0.00747247	0.00956727	0.106538	0	0.00810086	0.0102345	0
ENSMUSG00000000561	Wdr77	3.22944	12.6508	3.08694	6.81958	3.43108	4.35258	17.1849	1.8657	15.9791	7.25747	6.75932	7.81946	1.73982	1.95099	7.11236
ENSMUSG00000000562	Adora3	40.3147	51.0856	38.4033	32.588	30.6207	30.5589	40.8314	32.4586	28.2727	26.4207	35.8097	36.2849	35.637	33.1719	26.9279
ENSMUSG00000000563	Atp5f1	4.56079	7.68469	5.62158	3.9407	9.59131	10.566	3.90834	8.61802	5.49478	5.34209	4.5295	6.58296	4.52405	8.64785	5.90164
ENSMUSG00000000567	Sox9	0	0	0.0424434	0.00620689	0.00364015	0	0	0.00553555	0.00395824	0	0.00567493	0.0042875	0	0.00300436	0.00143579
ENSMUSG00000000568	Hnrnpd	13.0342	28.0938	25.6913	21.872	44.0083	34.346	43.7165	37.2363	36.6777	35.5514	25.5596	24.9464	20.6517	26.7767	25.7864
ENSMUSG00000000579	Dynlt1c	0.0169939	0.0160664	0.0972555	1.41612	0.556275	0.187052	0.33784	0.344069	0.845937	0.926583	0.973737	0.509207	0.917908	1.07048	0.486678
ENSMUSG00000000581	C1d	3.26329	2.38663	4.92535	2.43612	5.17627	1.92083	1.66248	4.74026	1.26246	1.65005	3.22498	1.97027	1.54826	1.38789	3.0558
ENSMUSG00000000594	Gm2a	12.8822	10.2565	11.3633	13.0692	28.5231	27.5754	23.5161	22.5069	14.7695	13.4267	12.9765	11.2137	15.0698	26.0337	27.523
ENSMUSG00000000600	Krit1	4.62536	10.9289	9.93496	7.74593	7.0754	5.30527	8.00644	6.63991	8.97817	8.75167	6.76379	7.81973	8.5838	7.76251	8.37551
ENSMUSG00000000605	Clcn4	4.46063	4.05416	7.93839	9.46626	6.01559	5.79831	7.83056	5.88333	7.26742	8.12795	5.36224	8.00542	6.05028	6.91306	6.0977
ENSMUSG00000000606	Vmn2r88	0	0	0	0	0	0	0	0	0	0	0	0	0	0	0
ENSMUSG00000000617	Grm6	0	0	0	0	0	0	0	0	0	0	0	0	0	0	0.0198621
ENSMUSG00000000627	Sema4f	0	0	0	0	0	0	0	0	0	0	0	0	0	0	0
ENSMUSG00000000628	Hk2	46.8655	20.1387	42.2395	35.8145	32.5583	41.8458	41.9873	30.8999	53.9748	49.9607	47.9606	15.3532	37.3677	14.3899	39.8585
ENSMUSG00000000631	Myo18a	13.3964	4.80098	4.57763	5.81625	6.58882	4.28216	6.05899	5.36439	8.59284	13.6424	5.46833	8.06958	7.71583	7.01447	6.69893
ENSMUSG00000000632	Sez6	0.00695921	0	0	0	0.0207133	0	0	0	0.0151044	0	0	0.0661183	0.645753	0.0694434	0.0191205
ENSMUSG00000000673	Haao	3.95815	0.0621877	0.847177	1.55794	4.82705	1.88427	4.78836	3.16641	0.959297	2.11036	2.51716	1.04339	1.02126	3.20878	5.14212
ENSMUSG00000000682	Cd52	7.90988	22.3166	24.0129	34.4047	135.18	189.316	76.2206	110.319	21.1202	22.7603	18.2591	26.2361	40.8858	49.104	62.3543
ENSMUSG00000000686	Abhd15	0	11.3751	10.6605	9.33145	7.54153	6.50451	0	8.66046	7.5612	8.83713	0	7.907	7.11431	10.4766	9.60278
ENSMUSG00000000690	Hoxb6	0	0	0	0	0.027821	0	0.035868	0	0	0	0	0	0	0.0780299	0.0438631
ENSMUSG00000000693	Loxl3	6.27047	5.38434	10.2017	6.94641	8.54963	0	0	0	5.07156	9.71033	7.27223	7.68221	0	7.35387	8.9042
ENSMUSG00000000701	Tcl1b5	0	0	0	0	0	0	0	0	0	0	0	0	0	0	0
ENSMUSG00000000706	Btn1a1	0	0	0.00235545	0	0	0	0.00371985	0	0	0	0	0.00501844	0	0	0.0103134
ENSMUSG00000000708	Kat2b	13.6469	1.97918	2.9546	1.72433	1.84474	4.46233	2.5278	3.25194	7.1908	2.98722	2.43567	3.21979	1.65994	2.45229	2.47786
ENSMUSG00000000711	Rab5b	6.94501	4.6117	2.79991	5.51999	6.11993	4.48293	5.31209	4.93738	9.74001	3.01465	4.06215	6.20743	7.01341	4.89194	4.21843
ENSMUSG00000000724	Cryba1	5.15421	0.800777	2.80203	3.53871	2.08934	2.67895	2.77707	1.24274	1.58774	0.747599	2.11844	0.720053	1.01751	2.07533	0.787132
ENSMUSG00000000730	Dnmt3l	0	0	0	0	0	0.0124	0	0.0220652	0	0	0	0	0	0	0
ENSMUSG00000000731	Aire	0	0	0	0	0.0107841	0	0	0	0	0	0	0	0	0	0.00214192
ENSMUSG00000000732	Icosl	17.2351	20.387	19.4539	23.088	26.6914	25.414	28.9079	23.9588	19.8489	27.0898	27.5937	25.3837	25.4553	27.8723	32.6364
ENSMUSG00000000751	Rpa1	0.858299	4.2476	1.43914	3.34115	3.75894	2.81594	7.94323	2.9798	3.06333	1.06733	1.59072	2.78496	3.1334	1.94726	1.71599
ENSMUSG00000000753	Serpinf1	20.4811	16.574	23.9426	23.958	32.5518	28.4576	57.3457	32.3872	25.2592	22.8711	25.3699	32.3809	32.9421	42.0388	28.5599
ENSMUSG00000000759	Tubgcp3	13.3934	5.96301	5.73714	3.99273	7.36139	4.90881	9.1242	4.92096	9.73839	10.6177	3.83205	5.85951	4.04057	5.13625	4.83814
ENSMUSG00000000766	Oprm1	0	0	3.52867	2.28782	2.72097	4.56715	2.99372	3.53954	1.88231	1.83692	5.52685	1.30172	3.09527	3.15051	3.30788
ENSMUSG00000000776	Polr3d	0.703365	0.0288216	1.43887	1.07084	2.00812	1.37749	3.29709	0.891455	3.0493	1.78229	7.7263	2.709	1.13575	1.21416	0.974456
ENSMUSG00000000782	Tcf7	0	0	0.0874567	0.295073	0	0.302787	0.00763204	0.0645924	0.0194235	0	0.41165	0.0756292	0.0208273	0.122025	0.0190018
ENSMUSG00000000787	Ddx3x	16.3214	19.1587	19.7357	26.1033	20.1104	19.2502	20.5669	22.737	28.8269	20.8858	16.9586	33.6199	20.7936	32.394	18.9598
ENSMUSG00000000791	Il12rb1	0	0	0	0	0	0.0300465	0	0	0	0.00719411	0	0	0	0.0375077	0.0373308
ENSMUSG00000000792	Slc5a5	0.677626	0.178849	0	0.11327	0.0286777	0.0774766	0.0140557	0.0445833	0	0.0764117	0	0.0441494	0.0389607	0.028107	0.038731
ENSMUSG00000000794	Kcnn3	0	0	0.0854402	0	0	0	0	0	0	0	0	0	0	0.00866323	0
ENSMUSG00000000804	Usp32	2.07591	1.85526	3.08182	3.30367	2.11797	2.66093	9.52333	2.43239	2.4181	3.07383	2.20608	2.22997	2.44268	2.48556	2.35226
ENSMUSG00000000805	Car4	0	0	0	0	0	0	0	0	0	1.03458	0	0	0	0	0
ENSMUSG00000000811	Txnrd3	0.169768	0.233669	0.0431469	0.263549	0.0594728	0.0734383	0.0277515	0.123651	0.191717	0.417096	0.45918	0.392757	0.189816	0.142727	0.0468403
ENSMUSG00000000817	Fasl	0	0	0	0	0	0	0	0	0	0	0	0	0	0	0
ENSMUSG00000000823	Zfp512b	2.64375	41.4955	1.59562	1.7342	3.34674	2.12926	16.4307	2.35582	4.20945	1.57533	1.92852	3.106	3.57888	2.34548	4.1431
ENSMUSG00000000826	Dnajc5	8.18199	5.44152	6.81802	9.33413	10.3639	10.4516	10.8524	7.98025	9.21565	9.85021	7.96134	6.66552	9.27477	9.65474	9.79242
ENSMUSG00000000827	Tpd52l2	10.6716	12.719	12.3967	22.3373	22.784	13.5786	19.1958	16.7964	17.0814	15.0727	11.1674	20.4231	11.6444	12.5452	13.8191
ENSMUSG00000000838	Fmr1	3.51691	6.40096	4.53912	4.1009	4.21271	6.23715	4.85442	5.31311	4.30593	3.23506	5.59742	6.58341	4.60409	4.5714	2.83707
ENSMUSG00000000861	Bcl11a	0.119274	0.00875217	0.0682108	0.124613	0.509491	0.361879	0.0190404	1.313	0.339972	0.523715	0.0941188	0.00290186	0.640974	0.884524	0.153167
ENSMUSG00000000869	Il4	0	0.0360589	0	0	0.0581938	0	0	0.172915	0	0.0496463	0	0	0.205204	0.334873	0.0694947
ENSMUSG00000000876	Pxmp4	0.577557	3.14454	0.658858	1.83814	3.25638	6.40735	0.80418	4.29577	1.37031	1.98735	4.48372	5.20661	4.29957	4.13847	2.94093
ENSMUSG00000000881	Dlg3	3.59675	0.461398	2.03876	3.27774	2.42085	1.66169	3.5903	2.04965	2.56825	3.3241	2.04431	2.5565	1.76476	2.51214	2.37814
ENSMUSG00000000884	Gnb1l	0	0.241548	0	0.338488	0.0277597	0.0964307	1.56865	0	1.36051	0.441438	0.017546	0.320366	0.262938	0	0.102016
ENSMUSG00000000889	Dbh	0	0	0	0	0	0	0	0	0	0	0	0	0	0.0196884	0
ENSMUSG00000000901	Mmp11	4.0498	0.618254	2.33444	0.616612	0.353983	1.2698	3.03432	0.554949	0.774815	0.844845	0.0725383	0.384378	1.41134	0.765092	0.700971
ENSMUSG00000000902	Smarcb1	2.93659	1.50523	5.35542	5.71403	5.64627	3.47755	6.74143	4.61907	3.22985	4.53423	6.76526	4.03903	4.579	4.06914	4.93469
ENSMUSG00000000903	Vpreb3	0	0	0	0	0	0	0	0.127123	0	0	0	0	0	0	0
ENSMUSG00000000915	Hip1r	0	0	0	0.880502	0	0.241666	0.327605	0	0	0	0.365674	1.07055	0.663493	0	0
ENSMUSG00000000916	Nsun5	6.30998	0	0	0	0	0	0	0	0	0	0	0	0	0	0
ENSMUSG00000000934	Top1mt	0.173148	0.0409197	0.147597	0.916903	2.40051	1.2261	3.34421	0.926444	0.017337	2.4261	0.995821	0.530944	0.223753	0.883291	0.872936
ENSMUSG00000000938	Hoxa10	0	0	0	0	0	0	0	0	0	0	0	0	0	0	0
ENSMUSG00000000942	Hoxa4	0	0	0	0	0	0	0	0	0	0	0	0	0	0	0
ENSMUSG00000000948	Gm38393	0	0	0.150377	0.0593032	0.0110297	0.00944317	0.00321613	0.131991	0	0	0	0.167335	0	0.0452187	0.0506792
ENSMUSG00000000957	Mmp14	5.90668	5.88273	7.12658	4.52963	10.8265	12.2245	10.5562	10.5221	8.48784	4.28076	4.30865	4.87136	8.76603	8.01629	8.37645
ENSMUSG00000000958	Slc7a7	20.9606	16.0568	35.1433	30.0119	25.4469	25.8373	65.686	25.0214	25.491	39.0529	64.1671	20.2236	24.7089	21.037	31.3065
ENSMUSG00000000959	Oxa1l	15.1949	11.6544	11.3876	10.7305	28.6626	8.15812	11.945	8.10259	12.4591	9.12566	12.0429	12.587	25.7022	21.2599	22.1122
ENSMUSG00000000976	Heatr6	5.44116	9.34942	8.17819	3.04108	3.53026	3.67937	5.44885	4.24341	4.08748	8.77993	8.72183	4.9937	3.32417	3.38314	3.96462
ENSMUSG00000000982	Ccl3	6.66474	3.73424	4.18064	11.9759	103.484	92.4029	27.6049	21.3431	8.03301	15.246	1.7651	3.14644	19.6461	9.98738	21.8971
ENSMUSG00000000983	Wfdc18	0	0	0	0	0	0	0	0.302191	0	0	0	0	0	0	0
ENSMUSG00000001014	Icam4	0	0	0	0	0	0	0	0	0	0	0	0	0	0	0
ENSMUSG00000001016	Ilf2	3.04354	8.65553	4.25719	2.29819	5.4159	3.55739	8.07891	10.8619	3.19907	9.23867	35.7013	2.32058	7.41519	4.99483	2.25616
ENSMUSG00000001017	Chtop	17.3286	29.2059	13.153	13.1732	14.4276	17.0741	15.2648	14.1701	19.3879	19.4552	11.934	14.4755	13.0212	16.3485	12.1088
ENSMUSG00000001018	Snapin	15.1837	12.6443	19.0153	14.7389	21.4378	24.5757	15.4859	9.75353	17.6722	27.4559	26.2595	20.2673	18.5915	20.6166	20.247
ENSMUSG00000001020	S100a4	0	0	0	0.60755	1.7332	1.47529	0.0567519	0.521236	0	0	0	1.08073	0.276478	0.793006	0.33348
ENSMUSG00000001021	S100a3	0.00440745	0	0	0	0	0	0	0	0	0	0	0	0	0	0
ENSMUSG00000001023	S100a5	0	0	0	0	0	0	0	0	0	0	0	0	0	0	0
ENSMUSG00000001025	S100a6	0	0	0	0	0	0	0	0	0	0	0.374251	0	0	0.0461077	0
ENSMUSG00000001027	Scn4a	0	0	0	0	0	0	0	0	0	0	0	0	0	0	0
ENSMUSG00000001027	Scn4a	0	0	0	0	0	0	0	0	0.00484524	0	0	0.00255367	0	0.00374978	0.000906791
ENSMUSG00000001029	Icam2	0	0	0.105455	0.0523187	0.318671	0.207394	0.825231	1.02412	0.808218	0.0243196	0.207118	0.607946	0.355225	1.04797	0.735858
ENSMUSG00000001034	Mapk7	2.81064	4.31892	2.24774	4.17056	3.03506	4.32963	3.71572	3.12377	4.22163	4.10165	3.54287	3.23376	5.84065	3.62932	3.4978
ENSMUSG00000001036	Epn2	3.90779	4.16358	0.973261	1.61965	0.585378	0.559852	1.80735	0.33836	1.64966	1.91821	0.872419	2.37299	1.53337	1.2891	0.657815
ENSMUSG00000001039	B9d1	0.289436	0.203902	0.659987	0.296099	0.0244123	0.341705	0.38436	0.262471	1.72025	4.09467	0.0188042	0.725319	0.0563467	1.18285	0.689856
ENSMUSG00000001052	Sec24b	13.6738	24.6846	19.225	14.0075	23.3521	28.0754	14.6067	17.0018	23.6557	15.6498	25.4287	16.1793	20.0025	16.1958	15.8089
ENSMUSG00000001053	N4bp3	0	0	0	0	0	0	0.826721	0.0381707	0	0	0	0.110534	0	0.209622	0.16844
ENSMUSG00000001054	Rmnd5b	7.375	2.85805	5.32121	8.76122	4.00931	1.77534	4.7166	3.20839	5.64697	3.18598	3.16303	3.95755	4.16648	3.93147	2.71988
ENSMUSG00000001056	Nhp2	3.14292	0	4.41848	0	5.61756	6.49654	3.28974	5.8124	1.02836	2.87672	1.22952	3.13805	2.01953	1.4441	4.30857
ENSMUSG00000001076	C1ql4	0	0	0	0	0	0	0	0	0	0	0	0	0	0.0545166	0
ENSMUSG00000001082	Mfsd10	9.63934	4.37706	5.65496	4.82311	8.23327	9.99058	8.17511	9.72059	6.34289	4.24877	5.39332	9.54159	8.7602	8.43392	5.50965
ENSMUSG00000001089	Luzp1	1.20319	1.37189	1.82993	1.18642	3.09035	3.69418	3.29432	2.9798	1.93062	1.5846	2.75699	2.10539	2.01215	1.58147	2.38226
ENSMUSG00000001095	Slc13a2	0	0	0	0	0	0	0	0	0.0425548	0	0	0	0	0	0
ENSMUSG00000001098	Kctd10	2.82928	4.91699	1.79729	2.70487	4.47154	4.50897	8.97397	4.85769	2.97438	6.04124	1.2105	0.916601	2.1589	3.3402	1.64437
ENSMUSG00000001100	Poldip2	3.87434	7.81742	3.45419	5.40841	7.13881	5.88799	12.3528	6.41837	6.84155	7.1063	7.81775	6.60803	7.39807	6.38973	6.1039
ENSMUSG00000001103	Sebox	0	0	0.653181	0.259091	0.146553	0	0	0	0.0124459	0	0.018489	0	0.120844	0.0298334	0.0483234
ENSMUSG00000001105	Ift20	15.7823	8.5378	20.6611	11.0511	12.092	9.02929	13.8183	11.3848	11.0196	12.2631	8.5552	13.8347	12.773	8.44295	6.2008
ENSMUSG00000001119	Col6a1	0	0	0	0	0	0	0	0	0	0	0	0	0	0	0
ENSMUSG00000001120	Pcbp3	0.0178396	0	0.310772	0.0616653	0.0487956	0.0852817	0	0.252019	1.39091	0.235971	0.241272	1.33953	1.58314	0.406583	0.223113
ENSMUSG00000001123	Lgals9	38.1479	108.404	28.9215	38.3626	77.3561	67.316	56.401	70.5393	46.0673	91.8011	42.6963	53.4791	58.7672	56.0855	54.8011
ENSMUSG00000001127	Araf	8.043	32.2993	11.0858	9.90914	12.3586	9.54622	6.6487	8.82064	14.7013	14.7208	10.5097	12.2812	11.7511	12.0136	10.0319
ENSMUSG00000001128	Cfp	0.09534	0.0499221	0.165055	0.184987	0.509405	0.148013	0.725867	0.162751	0.55802	0.727902	0.531985	0.291051	0.0648179	0.174264	0.01541
ENSMUSG00000001131	Timp1	0	0	0	0	0.0195991	0	0	0	0	0	0	0	0	0	0
ENSMUSG00000001134	Uxt	0	2.11484	0	2.34321	0.772945	0	2.79077	0	0	1.44081	2.95397	0	0	0	0.836282
ENSMUSG00000001138	Cnnm3	5.53911	3.94571	3.88221	3.28765	3.697	3.51567	3.82488	3.93327	8.5856	3.25902	3.11036	4.33485	3.25592	4.64607	3.42767
ENSMUSG00000001143	Lman2l	6.90155	3.83077	10.6532	6.33312	7.89048	8.2986	9.38926	9.58701	5.47752	5.50937	16.9466	6.74364	8.4917	7.81223	7.88812
ENSMUSG00000001150	Mcm3ap	6.45488	4.46859	7.31051	2.65088	5.36883	11.1445	7.58653	6.31369	9.05693	2.57004	2.03726	6.3544	2.34849	10.0239	3.01888
ENSMUSG00000001151	Pcnt	1.92518	0.438213	3.07304	4.36105	2.23665	3.23214	1.39215	3.60387	4.63047	3.45693	3.47477	2.80443	2.78948	2.66554	2.27066
ENSMUSG00000001155	Ftcd	0	0	0	0	0	0	0	0	0	0	0	0	0	0	0
ENSMUSG00000001156	Mxd1	2.52934	5.50297	3.7199	2.82914	1.45669	3.03681	0.611404	1.41113	3.85463	2.76835	7.07168	3.10216	2.57311	3.10341	2.63325
ENSMUSG00000001157	Gmcl1	5.7436	6.3122	4.195	4.88313	3.87063	4.25315	2.15497	4.03045	6.53128	3.25608	3.6772	2.64523	4.21844	4.11726	3.87154
ENSMUSG00000001158	Snrnp27	5.65495	12.8732	1.81843	5.03333	6.0688	6.31852	3.39449	6.1295	10.2516	6.61996	3.31391	5.86878	4.24296	4.42577	3.7312
ENSMUSG00000001166	Oas1c	0.205018	0	0.277315	0.379474	0.32734	0.382484	0.165653	0.320254	1.14947	0.127416	0.00987769	0.513876	0.16027	0.277555	0.0297862
ENSMUSG00000001168	Oas1h	0	0	0	0	0	0	0	0	0	0	0	0	0	0	0
ENSMUSG00000001173	Ocrl	1.88088	1.72371	5.72164	4.62939	3.61953	8.80321	3.90901	6.78469	1.35973	3.25211	2.21822	7.34662	2.80524	2.65734	6.30978
ENSMUSG00000001175	Calm1	48.4042	28.7604	27.9832	39.0669	124.466	82.9203	74.1773	100.741	54.8585	39.9814	50.2418	46.0796	39.1485	31.5503	30.835
ENSMUSG00000001211	Agpat3	25.1917	33.8311	4.80287	10.7204	13.2197	6.76458	14.3476	12.7683	10.7541	8.79128	5.79828	5.60278	9.10035	6.59093	8.54368
ENSMUSG00000001225	Slc26a3	0	0	0	0	0	0	0	0.049136	0	0	0	0	0	0.0039912	0
ENSMUSG00000001227	Sema6b	0.0103209	0.111171	0.463593	0.116595	1.44058	1.40058	2.4768	2.56863	0.292301	0.354958	0.395177	0.125471	0.498709	0.706256	0.692105
ENSMUSG00000001228	Uhrf1	0	0.344119	0.135727	0.0266213	5.16683	6.47947	3.00407	7.01162	1.86904	0	0.0460189	1.26033	1.81009	0.682152	0.526684
ENSMUSG00000001229	Dpp9	1.22733	1.33453	2.86895	3.47257	5.11944	4.28796	8.02792	3.33344	2.3399	2.59811	2.87663	2.34824	2.33126	2.4997	3.90527
ENSMUSG00000001240	Ramp2	0	0	0	0	0	0	0	0	0	1.64596	0	0	0	0	0
ENSMUSG00000001247	Lsr	0	0	0	0	0	0	0	0	0	0	0	0	0	0	0
ENSMUSG00000001248	Gramd1a	9.68211	10.0373	13.0645	21.5387	17.2599	19.5034	22.8916	18.2713	20.6239	30.1513	40.3701	19.2582	12.3459	19.9037	18.2645
ENSMUSG00000001249	Hpn	2.67799	2.4416	3.34135	6.38387	6.81588	3.98451	2.48016	3.43638	6.78293	7.07444	2.52509	4.27327	6.3262	6.50519	7.75338
ENSMUSG00000001260	Gabrg1	0	0	0.00463884	0	0.034459	0	0	0	0	0.0233263	0	0	0	0	0.00955953
ENSMUSG00000001270	Ckb	80.5116	23.6681	33.52	67.2329	82.203	70.7786	78.7173	97.5315	75.4497	57.119	61.7711	63.2404	72.9302	63.0904	44.9726
ENSMUSG00000001280	Sp1	7.76921	8.52386	8.45802	10.4386	6.92006	8.42856	7.6082	8.32482	9.9802	9.38285	7.20573	10.1872	8.00419	8.80813	6.65434
ENSMUSG00000001281	Itgb7	0.188281	0.311876	0.571619	0.227645	0.505156	0.265912	0.698201	0.446538	0.103302	0.868112	0.145769	0.217281	0.352464	0.423306	0.462287
ENSMUSG00000001285	Myg1	5.20668	10.3577	16.6906	0	5.24898	4.41387	27.7294	11.0596	32.66	0	16.4058	2.32784	14.1594	0	2.51867
ENSMUSG00000001288	Rarg	0.140074	0.465345	0.459247	2.43166	0.161501	0.146523	0.118846	0.262131	0.659608	3.11956	0.15329	0.980187	0.186102	0.399632	0.280744
ENSMUSG00000001289	Pfdn5	15.9505	0	10.7351	31.6321	37.7739	19.338	13.1222	36.1393	21.1206	38.0076	11.6654	27.149	23.5801	42.1088	26.039
ENSMUSG00000001300	Efnb2	1.80229	2.01064	1.66913	0.402023	1.16673	0.346483	0.245275	0.304304	1.19918	1.76156	0.582422	0.858726	0.480269	1.63685	0.913435
ENSMUSG00000001305	Rrp15	0.701159	1.36065	0.591032	1.11014	2.25466	3.59766	1.42256	1.80636	1.19873	1.4888	1.36	0.793175	1.11153	0.560257	1.58329
ENSMUSG00000001313	Rnd2	0	0	0	0	0	0	0	0.433272	0.64122	0	0.889634	0	0	0.296919	0
ENSMUSG00000001323	Srr	0	0	0	0	0	2.2803	0	0	0	0	0	1.69703	0	2.15581	0
ENSMUSG00000001333	Sync	0	0	0	0	0	0	0	0	0	0	0	0	0	0	0
ENSMUSG00000001334	Fndc5	0.086886	0.324691	0	0.118235	0.0611137	0.367724	0.25933	0.459684	0.153789	0	0.0216006	0	0.158477	0.0320029	0.0198441
ENSMUSG00000001348	Acp5	0	0	0	0.0906946	0.212318	0.886703	0	0.311603	0.275616	0	0	0	0	0	0.0279966
ENSMUSG00000001349	Cnn1	0.00604112	0.0881645	0.268598	0.0158039	0.118105	0.0791428	0.0159364	0.497846	0.0663646	0.0417226	0.0143612	0.0930108	0.153117	0.229395	0.112564
ENSMUSG00000001366	Fbxo9	2.3441	7.5709	2.37536	2.77994	3.78467	5.47674	4.53957	5.15865	2.10315	3.51052	9.84122	3.31564	8.20111	5.40709	4.08614
ENSMUSG00000001376	Vps50	3.96688	7.57348	5.73091	3.26971	6.15789	5.00365	5.53532	4.68301	4.92738	3.30318	3.65075	3.34203	3.71366	5.17153	5.68866
ENSMUSG00000001380	Hars	3.25212	0.970278	3.78613	4.70886	3.42818	6.96337	5.0177	3.17959	4.32477	4.27914	1.36463	1.6218	3.0465	2.55233	1.96793
ENSMUSG00000001383	Zmat2	2.41866	2.69205	3.25677	4.98231	4.28387	2.89751	4.52768	4.34685	5.73299	3.62414	2.2875	5.11306	5.07207	3.0874	2.97416
ENSMUSG00000001403	Ube2c	1.85252	0	0.0386998	1.77661	21.8387	31.3083	13.7218	48.7501	0.0181742	0.267427	0	0.134647	2.90085	15.8437	5.14336
ENSMUSG00000001415	Smg5	4.06743	2.23687	3.04834	5.24199	7.38197	3.78704	5.67476	5.24875	2.90722	8.58664	8.42273	6.98099	5.8409	4.21131	4.11557
ENSMUSG00000001416	Cct3	10.0628	18.1062	15.4694	7.35058	17.804	21.5215	46.9099	13.2517	8.01169	13.7017	11.5922	15.4028	10.8474	9.83011	8.6986
ENSMUSG00000001418	Glmp	78.2624	41.8558	40.3127	58.23	101.664	67.0575	44.4555	76.787	54.1166	49.1331	79.6525	41.2822	49.6305	57.5161	73.6018
ENSMUSG00000001419	Mef2d	75.8108	15.8988	21.7686	23.1807	22.1172	19.048	30.6899	14.5418	22.2726	55.6422	29.7433	28.6577	24.5356	23.525	20.3621
ENSMUSG00000001420	Tmem79	0	0	0	0	0	0	0	0	0	0	0	0	0	0	0
ENSMUSG00000001424	Snd1	6.27483	15.871	10.1844	9.85717	14.1868	12.2936	13.8467	8.90435	10.4673	8.58098	9.27763	10.6984	8.11652	6.15693	7.28678
ENSMUSG00000001435	Col18a1	0	0.00379005	0	0	0	0.00290443	0.254137	0.0443895	0	0.00525559	0.128101	0.060907	0.00261965	0.0293808	0
ENSMUSG00000001436	Slc19a1	5.86722	2.73325	2.8051	3.74395	6.17959	8.53993	15.7639	1.47125	4.71398	3.19667	10.2369	3.48522	5.87678	3.37063	6.69821
ENSMUSG00000001440	Kpnb1	12.0087	9.97377	9.57458	13.63	17.0672	18.5161	21.3083	20.623	12.3565	14.4732	16.7936	13.1624	13.6487	12.3715	12.208
ENSMUSG00000001441	Npepps	37.3121	12.3102	8.43027	6.51529	6.9067	10.6008	17.2454	14.3573	18.0562	7.70624	7.60028	5.7132	11.1411	28.6114	28.7282
ENSMUSG00000001444	Tbx21	0	0	0	0	0	0	0	0	0	0	0	0	0	0	0
ENSMUSG00000001445	Mrpl10	3.64966	7.59566	2.93319	1.21419	4.40909	3.23717	1.78596	1.61237	3.36457	5.02624	4.51415	2.55124	4.22007	2.94749	3.65922
ENSMUSG00000001467	Cyp51	2.16753	2.26105	0	0	4.13955	3.68382	4.74708	2.26435	0	0	0	2.70038	3.27662	0	0
ENSMUSG00000001473	Tubb6	0.216595	0.463545	0.67533	0.494071	6.73384	7.60925	9.4323	3.38289	1.46899	0.970899	2.46879	1.95143	0.629542	1.81808	2.07678
ENSMUSG00000001493	Meox1	0	0	0	0	0.113167	0	0	0	0	0	0	0	0	0.0548192	0.0604332
ENSMUSG00000001494	Sost	0	0	0	0.29568	0	0	0	0	0.357897	0.694329	0.00655086	0.0190186	0.459739	0.0208887	0.00999584
ENSMUSG00000001496	Nkx2-1	0	0	0	0	0	0	0	0	0	0	0	0	0	0	0
ENSMUSG00000001497	Pax9	0	0	0	0	0	0	0	0	0	0	0	0	0	0	0
ENSMUSG00000001504	Irx2	0	0	0	0	0	0	0	0	0	0	0.96479	0	0	0	0
ENSMUSG00000001506	Col1a1	0	0	0.00477267	0.00465277	0.00816988	0	0.00448818	0	0.00283407	0.00422391	0.0061722	0	0	0	0.00325674
ENSMUSG00000001507	Itga3	0	0	0	0	0	0	0	0.208785	0	0	0.43748	0	0	0	0.0385117
ENSMUSG00000001508	Sgca	0	0	0	0	0	0	0	0	0	0	0	0	0	0	0
ENSMUSG00000001510	Dlx3	0	0.0069644	0	0	0	0	0	0	0	0	0	0	0	0.00498279	0
ENSMUSG00000001517	Foxm1	4.99519	0	6.45456	0	2.78183	5.70731	7.6398	13.8998	0	0.44687	1.85166	0	1.65871	14.2038	0.762394
ENSMUSG00000001518	Itfg2	3.08691	2.2085	1.23792	5.22638	4.09945	5.85314	0	0	4.95131	7.34837	2.40663	3.80586	3.89266	0	2.25161
ENSMUSG00000001520	Nrip2	0	0	1.39793	0	0	0	0	0	1.67986	0.836648	0	1.05984	0	0	1.15982
ENSMUSG00000001521	Tulp3	0.198458	0.827495	1.09187	0.90075	0.813069	1.05542	1.2426	1.24539	0.964223	1.1173	0.6124	0.85141	1.57155	0.586194	0.722676
ENSMUSG00000001524	Gtf2h4	9.73327	0.968635	5.28008	2.40402	4.78358	3.92958	6.55807	2.03793	2.05679	4.89982	3.19035	4.30673	2.09676	4.27302	3.59608
ENSMUSG00000001525	Tubb5	52.9231	25.577	25.704	49.9619	71.5103	102.334	50.0049	119.644	32.8401	36.6527	45.4537	28.7591	51.4777	45.1826	32.6826
ENSMUSG00000001542	Ell2	2.57532	1.4738	2.09623	1.93466	9.07224	11.5635	7.85923	8.17364	11.0355	8.58149	13.5992	2.59386	4.16432	3.983	3.75182
ENSMUSG00000001552	Jup	5.2864	16.2165	5.87663	7.35215	9.17929	7.65635	3.88664	8.60306	12.2267	10.399	28.3212	7.32404	12.6146	7.4254	9.85716
ENSMUSG00000001555	Fkbp10	0	0	0	0	0	0	0	0	0	0	0	0.187898	0	0	0
ENSMUSG00000001558	Klhl10	0.954622	0	0.102338	0	0.161478	0	0	0	0.0759974	0	0.146219	0.00852673	0.108995	0	0.0291255
ENSMUSG00000001566	Mnx1	0	0	0	0	0	0	0	0	0	0	0	0	0	0	0
ENSMUSG00000001569	Nom1	1.26509	3.20413	1.27482	1.26669	1.23039	1.81811	1.13297	4.46872	7.85915	1.39374	0.869743	1.29409	4.44992	4.5133	1.03155
ENSMUSG00000001576	Ergic1	14.8297	5.21595	10.4495	8.77843	9.63375	8.80887	18.1249	12.0868	12.7783	6.08901	6.23249	8.07792	13.2684	4.72303	12.4335
ENSMUSG00000001583	Tnk1	0	0	0	0	0	0	0	0	0	0	0	0	0	0	0
ENSMUSG00000001588	Acap1	0	0	0	0	0	0	0	0	0.0894176	0	0	0	0	0.00422846	0
ENSMUSG00000001604	Tcea3	0	0	0	0	0	0	0	0	0	0	0	0	0	0	0
ENSMUSG00000001622	Csn3	0	0	0.00641722	0.0121029	0	0	0	0	0	0	0	0	0	0	0
ENSMUSG00000001627	Ifrd1	8.42169	18.0798	8.08866	6.07184	6.47622	13.5033	14.232	5.93505	10.1875	7.4314	16.1452	10.3851	5.0508	7.17099	3.15338
ENSMUSG00000001630	Stk38l	0.47385	0.424246	1.97765	1.0201	1.13163	0.61958	3.16182	1.04256	0.996836	1.28756	2.32817	1.32057	1.76864	1.38268	1.01011
ENSMUSG00000001632	Brpf1	6.2417	9.56051	4.92266	5.06261	9.76894	8.76057	6.96979	8.7512	7.29949	6.15344	5.87921	9.23706	5.8697	6.27604	6.23002
ENSMUSG00000001642	Akr1b3	1.36956	0.603756	2.03914	1.50721	4.68452	5.90226	2.55703	4.5954	5.06142	1.2615	3.94605	2.55336	2.29523	3.13898	3.16331
ENSMUSG00000001655	Hoxc13	0	0	0	0	0	0	0	0	0	0	0	0	0	0	0
ENSMUSG00000001656	Hoxc11	0	0	0	0	0	0	0	0	0	0	0	0	0	0	0
ENSMUSG00000001657	Hoxc8	0	0	0.00674033	0	0.222942	0	0	0	0.0087499	0.249451	0	0.037467	0.00490898	0.0311059	0.00313415
ENSMUSG00000001661	Hoxc6	0	0.294719	0	0	0	0	0	0	0	0	0	0	0	0	0
ENSMUSG00000001663	Gstt1	0.0152176	0	0	0	0	0.0130823	0	0	0	0	0	0	0	0	0
ENSMUSG00000001665	Gstt3	0	1.494	0.623021	0.328941	0	0	0	0.342834	0.569878	1.12045	0.45626	0.579641	0.645724	0.317551	0.288498
ENSMUSG00000001666	Ddt	0.0619697	1.7823	2.33659	2.3568	4.86247	1.4468	1.21665	3.39826	1.57266	2.505	0.878455	2.88287	1.88715	2.01757	2.13855
ENSMUSG00000001670	Tat	0	0	0	0	0	0	0	0	0	0	0	0	0	0	0
ENSMUSG00000001672	Marveld3	0	0	0	0	0	0	0	0	0	0	0	0	0	0	0
ENSMUSG00000001674	Ddx18	0.642494	1.68864	3.2144	3.61411	5.81511	4.44076	5.76856	2.92376	3.55254	1.24414	2.538	4.34228	4.91839	2.05115	2.9389
ENSMUSG00000001687	Ubl3	25.4192	30.5533	27.514	23.0616	17.839	19.6446	17.6568	14.8849	22.6022	21.0401	18.6688	23.9018	22.8586	20.0066	19.1591
ENSMUSG00000001700	Gramd3	1.3779	0.0135815	0.125607	0.278747	0.122074	0.485487	0.0433355	0.208701	0.355788	0.0677692	0.140748	0.633217	0.559841	0.28801	0.45068
ENSMUSG00000001707	Eef1e1	3.64812	1.71691	4.37801	2.16395	3.46255	5.53982	6.08107	2.4244	2.80492	4.51649	3.13566	1.72552	3.08102	1.34839	2.23226
ENSMUSG00000001729	Akt1	4.71248	12.6984	11.5175	11.6071	9.54621	9.59485	10.4357	10.2988	6.28344	11.5637	8.53401	9.55322	10.8909	9.93622	7.97224
ENSMUSG00000001739	Cldn15	0	0	0	0	0	0	0	0	0	0.00678497	0	0	0.0372085	0	0
ENSMUSG00000001741	Il16	30.1282	19.7218	21.3454	17.306	11.469	17.6982	14.5802	11.9987	17.1383	20.7021	17.6152	17.234	19.5426	18.4913	16.4123
ENSMUSG00000001750	Tcirg1	32.8059	25.9288	28.3301	35.0999	66.2085	43.7885	29.1335	28.3769	36.2195	41.3922	56.2622	40.3249	47.7586	46.3088	51.3396
ENSMUSG00000001751	Naglu	8.51331	13.0944	6.66666	7.95812	12.0106	12.2069	13.9263	11.018	9.07234	7.42628	11.1381	10.3749	10.4842	11.5678	13.853
ENSMUSG00000001755	Coasy	3.26326	4.68788	3.68395	4.83869	3.33204	5.8705	2.87756	2.92076	5.25045	5.20585	3.20994	5.96836	4.99371	6.15735	3.92786
ENSMUSG00000001761	Smo	6.24126	4.23423	3.15138	4.52759	4.87695	2.76613	3.20625	3.07994	5.1179	6.14867	4.15835	3.36324	5.97384	4.46496	4.27654
ENSMUSG00000001763	Tspan33	0.70311	3.44153	1.96699	1.85341	2.23878	1.71132	1.29568	1.61343	1.64	2.3808	2.26809	2.08763	2.16663	2.55179	3.26825
ENSMUSG00000001767	Crnkl1	2.92827	4.10332	2.81616	8.61363	4.03362	2.52521	6.98596	3.78561	2.15263	5.08459	3.18948	5.19117	3.60851	2.37385	1.99149
ENSMUSG00000001768	Rin2	12.4478	8.0081	16.6639	19.567	13.5001	10.754	17.0999	9.77973	22.7762	21.7411	25.3825	19.0735	17.5112	14.7307	15.3755
ENSMUSG00000001773	Folh1	0	0	0	0.0269855	0	0	0	0	0	0	0.0533396	0	0	0	0
ENSMUSG00000001774	Chordc1	3.33557	7.18099	4.89249	4.12533	3.33027	9.47386	3.72423	3.35324	3.5254	3.29217	2.31324	3.45926	2.70953	2.29032	2.49498
ENSMUSG00000001783	Rtcb	22.7504	16.8551	21.5077	16.6532	39.741	38.3666	28.1714	36.452	16.3699	11.9896	5.4453	18.196	22.5775	28.2789	36.2125
ENSMUSG00000001785	Pwp1	0.688978	3.35843	2.36464	2.92495	3.92092	5.00672	3.29589	4.4492	3.93232	2.6526	0.400931	2.8057	1.84726	2.80675	2.31289
ENSMUSG00000001786	Fbxo7	4.62915	4.65419	2.56079	2.47994	3.58111	5.95692	3.14168	6.22812	8.45721	3.34185	2.71866	5.99974	5.66768	8.24179	6.17396
ENSMUSG00000001794	Capns1	90.1528	51.0833	54.879	34.2471	85.0219	105.587	87.0306	71.3362	42.6542	48.3255	37.8267	51.6574	43.2052	55.2237	53.4031
ENSMUSG00000001802	Lrp3	0	0	0	0.0038879	0	0	0	0	0.558223	0	0	0	0.00582482	0	0
ENSMUSG00000001804	Dsg4	0	0	0	0	0	0	0	0	0	0	0	0	0	0.00329704	0
ENSMUSG00000001815	Evx2	0	0	0	0	0	0	0	0	0	0	0	0	0	0	0
ENSMUSG00000001819	Hoxd13	0	0	0	0	0	0	0	0	0	0	0	0	0	0	0
ENSMUSG00000001823	Hoxd12	0	0	0	0	0	0	0	0	0	0	0	0	0	0.0515747	0
ENSMUSG00000001827	Folr1	0	0	0	0	0.108947	0	0	0	0	0	0	0	0	0.0237342	0
ENSMUSG00000001829	Clpb	0.294476	3.08576	0.436696	0.855823	1.22672	1.09444	4.47855	1.37788	2.89743	1.38943	2.02543	1.02123	1.80789	1.12913	0.335368
ENSMUSG00000001833	Sept7	16.1515	14.8907	15.0629	13.6543	13.1131	16.2842	17.4416	15.8685	15.0019	11.129	8.86412	10.8509	11.5047	11.4127	13.3841
ENSMUSG00000001844	Zdhhc4	9.78535	6.4167	6.47743	8.09392	4.18183	2.68222	2.92173	5.75235	5.8569	3.92706	7.17897	5.30575	5.35602	6.54338	6.6054
ENSMUSG00000001847	Rac1	61.2134	66.9195	67.5492	66.3957	97.0118	82.7278	72.1826	84.8669	72.4985	63.7448	74.3075	77.1588	59.1018	62.1831	54.7069
ENSMUSG00000001855	Nup214	8.5169	20.9677	7.18673	6.64183	8.89918	11.3137	11.2725	9.57996	8.14887	6.73429	7.15388	10.0001	9.14313	8.02081	6.33498
ENSMUSG00000001864	Aif1l	0	0	0	0	0	0	0	0	0	0	0	0	0	0	0
ENSMUSG00000001865	Cpa3	0	0	0	0	0	0	0	0	0	0	0	0	0	0	0
ENSMUSG00000001870	Ltbp1	0	0	0.0700996	0.020451	0	0	0.00410697	0	0	0	0	0	0	0.00783296	0.00189973
ENSMUSG00000001891	Ugp2	7.62935	4.58078	6.38532	5.08287	5.52706	8.4345	7.0378	12.1105	8.21119	6.42759	2.85827	6.17618	6.85316	4.24115	5.02395
ENSMUSG00000001901	Kcnh6	0	0	0	0.0603443	0.00586746	0	0.00481401	0.0547821	0.0061863	0.00459984	0.0268979	0.0385749	0.0730084	0.100379	0
ENSMUSG00000001909	Trmt1	10.7744	5.93832	12.7831	9.64011	9.41141	8.71912	21.6722	7.83805	19.0614	8.36422	5.39982	5.29411	8.07414	5.74026	9.77111
ENSMUSG00000001910	Nacc1	2.56053	7.09794	4.1606	4.19081	5.53842	7.02558	7.64263	7.01139	5.28241	8.99067	4.39426	5.74056	5.5952	4.19453	3.95917
ENSMUSG00000001911	Nfix	5.63502	6.57027	5.37755	13.4982	4.73455	3.12553	4.15675	4.46033	6.71404	5.97466	20.9604	4.88111	5.10048	3.66747	4.06816
ENSMUSG00000001918	Slc1a5	1.07343	0	0.588862	0.380587	2.07285	0.861204	3.06665	4.94771	3.53922	2.42869	0.456937	2.83092	1.79085	0.534962	1.53178
ENSMUSG00000001924	Uba1	9.21397	17.7367	17.0567	9.15519	18.8719	19.1982	15.9936	17.7813	13.1362	12.0881	13.6496	10.4814	12.0715	9.97475	10.7454
ENSMUSG00000001930	Vwf	0	0	0	0.00286448	0	0	0	0	0.268666	0.0350361	2.11232	0.241471	0.0275353	0.132962	0.383359
ENSMUSG00000001942	Siae	3.80552	4.12786	3.90329	3.34848	4.18333	4.3507	2.81811	3.82563	4.20857	3.02693	3.75313	3.41698	6.03839	4.59638	4.21095
ENSMUSG00000001943	Vsig2	0	0	0	0	0	0	0	0	0	0	0	0	0	0	0
ENSMUSG00000001946	Esam	0	0	0	0	0.0932486	0	0	0	0	0	0	0.0376126	0.00646065	0.0153386	0
ENSMUSG00000001948	Spa17	0	0	0	0	0	0	0	0	0	0	0	0	0	0	0
ENSMUSG00000001962	Fam50a	2.99101	3.95687	3.26315	5.89127	5.85933	9.42141	5.43006	3.14066	4.20021	5.03694	3.91765	5.07099	3.08929	6.74427	4.33379
ENSMUSG00000001964	Emd	6.14557	9.35566	8.68296	9.01773	8.83523	4.69441	6.84167	8.0164	5.49219	6.41322	11.2182	8.80997	5.18532	4.40404	4.42289
ENSMUSG00000001983	Taco1	0.503516	3.43718	4.61321	1.40171	0.845004	1.97704	2.98599	2.83339	2.1945	3.15806	0.30366	1.06688	3.05003	1.5074	2.04289
ENSMUSG00000001985	Grik3	0	0.00199161	0.00293033	0	0.00168933	0.00143208	0	0	0	0.00824537	0.00260834	0	0	0	0
ENSMUSG00000001986	Gria3	0.0123141	0	0.00855329	0.00227491	0.0528746	0.00682712	0	0	0	0.0024088	0	0	0.00629145	0	0
ENSMUSG00000001988	Npas1	0	0.042557	0	0.00777304	0.0993253	0.0304542	0.0146771	0.0860898	0	0.315955	0	1.25147	0.0477471	0.13385	0.0251935
ENSMUSG00000001995	Sipa1l2	19.9643	14.7781	14.2405	18.888	22.137	18.7469	18.5573	16.2236	21.1295	19.4403	21.0999	21.0356	21.105	19.9491	21.9569
ENSMUSG00000001998	Ap4e1	2.47908	2.6931	4.59139	3.71103	3.40487	4.49963	6.31906	4.40391	4.7876	6.4522	4.0409	3.77189	4.08572	3.25091	3.14773
ENSMUSG00000001999	Blvra	2.99285	5.66854	2.92058	4.02818	2.5193	6.80877	1.84753	1.77778	5.11313	1.67159	1.74971	2.4806	2.64043	2.83115	4.07255
ENSMUSG00000002006	Pdzd4	1.33345	0.808872	1.95079	0.515953	0.896774	0.736788	0.967485	1.24766	0.553152	0.586252	0.617586	1.45431	0.961583	0.777832	1.09856
ENSMUSG00000002007	Srpk3	6.75765	1.52415	1.67732	1.30911	2.13522	1.18516	0.735422	0.795576	1.55606	2.56684	3.51322	2.5142	3.72134	2.10636	2.6203
ENSMUSG00000002010	Idh3g	29.9027	16.4521	21.8764	35.1549	26.9162	32.6796	18.2134	33.049	21.0268	40.1381	42.0886	21.8912	33.7443	27.7586	32.5871
ENSMUSG00000002012	Pnck	0.0388673	0	0	2.32062	0	0	0	0.234547	0.966405	0	0.0447788	0	0.559505	0.110907	0.162257
ENSMUSG00000002014	Ssr4	9.7998	25.6539	13.0922	11.9458	29.1537	28.9134	16.6106	19.8837	10.3274	11.4719	23.8912	11.2135	16.5129	13.6489	11.5815
ENSMUSG00000002015	Bcap31	13.9859	22.6884	22.3527	17.2853	28.2121	26.1087	23.7346	26.5457	14.5626	16.0543	24.1393	20.3116	18.4098	20.6562	19.7248
ENSMUSG00000002017	Fam98a	7.27931	2.25719	4.53434	6.38702	4.84925	3.85405	4.26037	3.67742	2.33366	2.0017	5.13297	2.33039	4.0097	2.5488	3.27287
ENSMUSG00000002020	Ltbp2	0	0	0.0116704	0.105616	0.278877	0.00206936	0.114217	0	0	0.00191114	0.730268	0.0404389	0	0.0144367	0.00161047
ENSMUSG00000002028	Kmt2a	7.46581	13.033	8.57789	9.63493	7.82551	8.76694	7.92091	8.13344	12.6697	9.29483	17.1335	10.356	9.70406	8.57243	8.3362
ENSMUSG00000002031	Ift46	1.16852	6.44055	7.32769	5.27959	2.816	7.64041	9.01565	4.51305	7.34683	3.2487	2.62684	6.82791	8.01508	7.68754	6.29122
ENSMUSG00000002032	Tmem25	0	0.00666263	0	0	0	0	0	0.696549	0.196772	0	0	0	0	0.0427307	0.0570782
ENSMUSG00000002033	Cd3g	0	0	0	0	0	0	0	0	0	0	0	0	0	0	0
ENSMUSG00000002043	Trappc6a	0.787862	0.0212515	1.10715	1.8094	1.80151	1.4584	1.52191	0.929204	0.937819	1.05161	0.100375	1.77148	1.60088	1.32463	0.61289
ENSMUSG00000002052	Supt6	6.49132	4.31835	5.46417	3.97289	6.19183	5.79127	8.75885	5.39644	5.23339	6.41068	3.03326	5.44763	6.74906	4.8612	5.61196
ENSMUSG00000002055	Spag5	0.0845088	0	0	0.0285048	1.00864	0.959112	0.136893	2.75695	0.0289413	0.0557946	0	0.00657263	0.36892	1.76166	0.0841444
ENSMUSG00000002057	Foxn1	0	0	0	0	0	0	0	0	0.0049785	0	0	0	0	0	0
ENSMUSG00000002058	Unc119	0	0	0	0	0	0.0326679	0	0	0	0.683665	0	0	0.0584988	0	0
ENSMUSG00000002059	Rab34	1.87906	0.227035	0.955272	1.89069	1.2087	0.0137312	0.442366	0.349944	1.98484	1.02939	3.08821	2.31764	1.33159	0.95968	1.62547
ENSMUSG00000002064	Sdf2	0	8.63944	5.12453	5.40184	12.3171	6.17626	0	11.7906	16.828	4.7654	3.55834	7.31598	6.35827	10.3304	0
ENSMUSG00000002068	Ccne1	0	0	0	0.00657334	0.649832	6.23354	2.5529	3.93284	0.0388303	0.00635363	0	0	0.142486	0.169816	0.110671
ENSMUSG00000002076	Hsf2bp	0	0	0.0544914	0.30022	0.0151976	0	0	0	0.0271503	0.0523491	0	2.63981	0.310203	0.0668241	0.06833
ENSMUSG00000002083	Bbc3	2.75157	0.678486	2.36154	0.641678	0.405678	0.673052	2.56157	0.736944	0.306357	1.07698	0.140749	0.246416	1.94835	1.16652	0.918221
ENSMUSG00000002100	Mybpc3	0	0.0633362	0.111546	0.064387	0.0372829	0.0970275	0.0576922	0.0745676	0.0198214	0.116139	0.00600623	0.0334173	0.114944	0.191189	0.0968322
ENSMUSG00000002102	Psmc3	5.23964	16.0443	6.67418	6.08868	10.1188	9.13758	5.9026	8.32518	9.46918	8.56016	10.064	13.2035	6.71028	7.37238	4.61003
ENSMUSG00000002103	Acp2	23.0036	20.1357	35.5687	32.1903	33.7619	28.4108	32.5142	27.9346	39.9052	29.2909	36.9817	40.0833	35.3948	35.1276	36.1231
ENSMUSG00000002104	Rapsn	0.433645	3.57197	0.191554	0.346425	3.16328	1.57228	2.64249	2.66455	3.31373	1.20825	2.09224	1.08643	2.29813	2.29333	3.57113
ENSMUSG00000002105	Slc39a13	8.73578	5.20272	6.7646	8.52903	10.9895	7.2119	10.6923	6.04896	13.3474	12.477	15.6287	9.4401	8.97004	9.14279	10.5648
ENSMUSG00000002107	Celf2	28.944	31.4359	31.5176	32.6304	20.939	22.3187	26.117	27.165	30.7347	27.5396	30.1247	34.1298	25.7037	28.0054	25.8903
ENSMUSG00000002108	Nr1h3	0.167048	0.194764	0.426599	0.23112	0.705669	0.0473742	0	0.138076	0.698553	0.0819562	2.23856	0.210571	0.110602	0.437648	0.449132
ENSMUSG00000002109	Ddb2	0	0	0	0	0	0	0	0	0	0	0	0	0	0	0
ENSMUSG00000002111	Spi1	49.5871	45	36.4703	40.5055	50.5627	72.3651	60.0162	60.5799	53.2659	39.2092	38.9731	45.6916	50.8806	50.5724	50.1214
ENSMUSG00000002129	Sf3a1	5.81809	10.3116	4.96324	6.58594	10.195	6.45528	13.7385	9.33478	6.43342	4.56128	4.81634	5.61676	6.56792	4.57224	7.74337
ENSMUSG00000002147	Stat6	13.096	52.7502	42.2107	16.678	14.3757	27.4132	29.4721	9.66831	26.0756	16.8012	40.2402	26.0306	37.2346	12.0546	26.5948
ENSMUSG00000002190	Clgn	6.44404	1.99099	2.10288	3.0412	1.59875	2.0182	1.30913	1.31967	2.82137	1.36313	2.56359	2.99638	2.59999	2.24117	1.09708
ENSMUSG00000002204	Napsa	0	0	0	0.00873886	0	0	0	0.20791	0	0	0	0	0.0077545	0	0.00410553
ENSMUSG00000002205	Vrk3	15.1858	11.6352	5.58987	8.10857	12.0848	6.87511	15.638	4.36025	9.4063	10.6341	19.4736	8.47594	9.05214	8.14564	5.16088
ENSMUSG00000002210	Smg9	10.316	6.8145	11.5634	14.2532	10.7821	19.6259	11.7116	14.294	12.0916	15.4855	9.39414	21.973	14.4179	10.5851	16.3597
ENSMUSG00000002221	Paxip1	2.68191	2.70408	4.39026	4.50975	3.98487	5.95312	12.9233	13.7559	4.61879	4.65607	9.74361	2.95716	3.60738	3.12154	3.85822
ENSMUSG00000002222	Rmnd5a	2.57763	7.77737	5.55109	6.19308	4.32223	3.59257	3.38862	3.99383	5.95254	5.14221	2.95136	2.67163	2.90073	4.63546	5.2158
ENSMUSG00000002227	Mov10	8.80735	2.72425	5.51345	11.0466	11.2327	7.86886	1.82952	11.1375	4.3821	4.48712	19.119	5.85928	5.77151	6.39161	11.6898
ENSMUSG00000002228	Ppm1j	0	0	0	0	0.0394424	0	0	0	0	0.362788	0	0.0434095	0	0	0
ENSMUSG00000002233	Rhoc	1.07967	10.8125	3.41029	1.21059	1.87284	3.40144	2.0425	1.61909	2.63294	2.80743	1.18285	6.39731	2.49472	2.34401	2.63832
ENSMUSG00000002240	Prr27	0	0	0	0	0	0	0	0	0	0	0	0	0	0	0
ENSMUSG00000002249	Tead3	1.16936	0.0230479	0.258838	0.294707	1.29342	3.37546	2.40654	4.21309	0.271988	1.38279	6.24145	0.0846013	1.45246	0.607864	0.685854
ENSMUSG00000002250	Ppard	29.5489	5.40774	7.70412	8.42367	16.4101	12.8187	11.6889	8.50776	6.06535	11.9359	20.0422	12.5786	13.4653	11.7897	14.5905
ENSMUSG00000002257	Def6	1.5461	2.0246	2.26962	4.15247	3.49207	6.68109	4.16081	2.71483	1.40555	2.97465	4.61256	2.10079	4.23243	3.29545	3.51064
ENSMUSG00000002265	Peg3	0.546186	0.0235199	0.356666	0.055155	0.00787089	0.161104	0.0349512	0.0461507	0.00344171	0.416421	0.0681884	0.162057	0.0715129	0.0652665	0.140421
ENSMUSG00000002266	Zim1	0	0	0.000939999	0	0.0417341	0	0	0	0	0.00162906	0	0	0	0	0
ENSMUSG00000002274	Metrn	0	0	0	0	0	0	0	0	0	0	0	1.70804	0	0	0
ENSMUSG00000002279	Lmf1	4.86064	5.7168	18.7284	10.8492	12.9137	6.72394	11.2979	9.0018	13.3288	14.4849	9.11199	6.86968	14.4951	9.67247	10.7296
ENSMUSG00000002280	Narfl	6.28084	2.69361	2.49892	1.31555	2.75421	3.07749	1.57916	2.54136	2.29519	4.27396	1.05807	4.57119	2.14905	2.87334	2.63245
ENSMUSG00000002289	Angptl4	0	0	0	0	0.127435	0.333958	0.0589101	0.120989	0	0.0209154	0	0	0	0	0
ENSMUSG00000002297	Dbf4	0.168983	1.72123	1.77007	0.898602	2.69458	5.63192	1.5299	6.43739	1.60277	0.976667	0.233385	0.96516	2.74703	3.75767	1.5174
ENSMUSG00000002307	Daxx	0.782737	14.2076	2.09654	8.97539	8.73648	9.81013	17.125	9.42003	4.97634	5.34148	4.02729	5.25494	5.86087	9.14761	5.425
ENSMUSG00000002308	Cd320	0.168423	4.99665	0.847934	3.8718	1.94235	2.15228	2.73161	1.60625	2.13695	3.65381	0.17552	0.740452	1.08124	0.742854	0.726303
ENSMUSG00000002319	Ipo4	9.64076	1.11371	0	0	3.83524	3.19995	0	2.58762	0	0	12.8162	0	1.60714	0	0
ENSMUSG00000002320	Tm9sf1	4.78474	12.6755	11.7004	13.0489	8.94403	15.448	7.91202	10.4267	14.5921	14.3029	8.82868	12.2385	9.57843	9.99277	9.02643
ENSMUSG00000002324	Rec8	0	0.274044	0	0.0323976	0.0868646	0.0244778	0.248733	0.24721	0	0	7.37367	0.0250877	0.936776	0.0417901	0.0812048
ENSMUSG00000002325	Irf9	8.3491	0	6.40583	8.07852	11.5696	8.72099	13.5056	3.34545	7.72469	9.14637	7.49493	11.2793	11.7139	9.17946	11.1043
ENSMUSG00000002326	Gmpr2	3.99877	10.8985	9.03258	13.3839	6.37208	5.91504	6.67328	6.84136	9.46749	35.9066	8.78941	7.17616	8.86989	10.884	11.2329
ENSMUSG00000002329	Mdp1	3.03779	3.42413	5.2699	5.7754	4.76477	4.99254	2.11082	4.69888	6.26044	5.62251	2.36978	6.70592	3.66122	6.51318	4.01016
ENSMUSG00000002332	Dhrs1	0.703544	12.4315	8.2899	4.58836	16.4884	13.3884	3.44902	16.1422	10.0618	9.99799	16.5857	10.6346	10.3272	10.776	8.59536
ENSMUSG00000002341	Ncan	0.00213497	0.00249892	0.00124224	0.0312722	0.0538767	0.0145965	0.00180754	0.00330566	0.0933546	0	0	0.00242341	0.0279253	0.0318519	0.00170484
ENSMUSG00000002342	Tmem161a	6.65711	4.78747	6.05121	6.21849	2.53003	1.95046	7.14682	6.61268	16.5881	3.54688	3.85799	3.11129	5.07875	3.20541	3.98086
ENSMUSG00000002343	Armc6	0	0	2.99425	0	0	0	0	0	0	0	0	0	0	0	0
ENSMUSG00000002345	Borcs8	8.31538	9.05758	6.41773	4.89584	11.7409	8.08577	3.19414	7.62354	5.59793	7.17628	10.5089	5.23862	8.90154	8.86383	10.124
ENSMUSG00000002346	Slc25a42	1.6112	1.00388	4.01661	0.891715	0.711935	1.24238	2.11838	0.942639	1.37133	0.798706	1.08533	1.6416	0.715381	0.823713	1.82033
ENSMUSG00000002365	Snx9	4.70221	6.11775	7.64704	3.37956	4.4851	3.88126	6.01906	2.2874	6.4792	2.96191	3.54111	4.5802	5.78588	4.60684	2.70563
ENSMUSG00000002372	Ranbp3	3.34979	4.68838	2.39564	2.81686	3.47841	4.01827	2.26604	3.40299	2.12237	3.25335	3.87368	3.25038	4.39925	3.90127	3.10376
ENSMUSG00000002379	Ndufa11	0.885938	0.0827443	0.967045	1.35911	1.40639	1.49547	0.674786	0.907411	1.30155	1.09703	1.46941	0.969074	1.20034	0.907891	1.59717
ENSMUSG00000002384	Bmp8b	0	0	0.309023	0	0	0.212471	0	0	0.455503	0	0	0	0	0.105261	0.377052
ENSMUSG00000002393	Nr2f6	6.15534	0	0	6.78803	5.28972	2.01282	0	2.45619	0	2.97479	0	0	11.8587	0	8.36598
ENSMUSG00000002395	Use1	5.86963	5.53602	7.0415	14.3587	13.5957	10.4434	7.53507	10.8637	15.674	7.0852	11.9629	12.0625	13.4412	10.9576	11.9767
ENSMUSG00000002396	Ocel1	4.65577	5.72398	3.19919	0.9754	2.23888	2.29101	5.02911	2.31189	3.14882	2.00125	2.85955	4.47785	2.49196	4.40641	1.76253
ENSMUSG00000002409	Dyrk1b	3.06962	3.1547	4.89476	2.79082	2.30758	3.95389	0.837398	2.63221	4.26045	3.8008	1.61374	5.68976	3.86181	4.81766	5.63398
ENSMUSG00000002413	Braf	7.1683	2.85527	13.5373	3.82585	4.39426	3.18728	7.11576	3.95986	6.53711	4.56692	12.0523	7.73128	4.26985	4.4105	3.56671
ENSMUSG00000002416	Ndufb2	0	0	0	0	0	3.05892	0	3.02505	0	0	3.85627	0	0	0	2.82639
ENSMUSG00000002428	Hltf	8.34559	8.97658	8.95782	5.33559	7.56705	7.60828	5.33146	7.50852	9.68694	7.16189	8.3697	7.21323	5.85376	8.39501	7.34782
ENSMUSG00000002455	Prpf6	5.89418	2.8096	2.44168	3.26867	3.15689	3.12752	2.91072	2.6101	3.37322	3.59961	2.66174	3.96098	3.15777	3.12989	2.34836
ENSMUSG00000002458	Rgs19	16.2843	17.826	18.8703	31.2417	28.2689	23.2449	29.9225	24.445	34.438	28.9996	34.3956	43.8551	30.8651	29.626	27.5284
ENSMUSG00000002459	Rgs20	0	0	0	0	0	0	0	0	0	0	1.1749	0	0	0	0
ENSMUSG00000002475	Abhd3	0.17623	0.0158269	0.180641	0.371141	0.233005	0.131182	0.444464	0.594866	1.19638	0.242445	0.0640998	0.815275	0.562761	0.389789	0.749118
ENSMUSG00000002477	Snrpd1	2.84754	3.7551	1.57848	2.11045	6.14803	3.24672	4.10181	5.66577	2.79734	2.34139	3.51725	2.84919	4.08922	1.76593	1.63321
ENSMUSG00000002486	Tchp	3.09708	5.00332	3.08901	4.309	3.85522	2.44568	3.05578	2.97163	5.03229	4.5597	3.07047	5.46833	5.19856	3.46545	4.32909
ENSMUSG00000002489	Tiam1	0.929217	0.329075	2.22447	3.53697	2.361	2.80827	1.10254	0.744944	1.5831	1.24514	3.85817	1.28813	1.89876	1.91486	1.33794
ENSMUSG00000002496	Tsc2	2.79961	0	0	4.60834	3.80012	3.85799	5.23508	5.97065	4.03212	4.07917	0	4.25866	4.48569	0	0
ENSMUSG00000002500	Rpl3l	0	0	0	0	0.135731	0	0	0.0464152	0	0.0864668	0	0.4595	0	0.0504654	0.0484745
ENSMUSG00000002504	Slc9a3r2	0.0189553	0	0.195623	0.056746	0.215841	0.411059	0.0629156	0.175449	0.0336175	0.0245444	0.0641992	0.542517	0.705581	0.789731	0.41343
ENSMUSG00000002524	Puf60	5.34982	9.69533	7.3633	7.01053	7.98005	6.43041	11.8606	7.20948	11.1921	9.14203	6.50755	6.81064	6.59449	5.87142	6.07047
ENSMUSG00000002546	Golga2	3.0932	1.41141	1.07368	2.60877	3.43811	1.21337	3.01254	2.23215	1.67656	3.10477	1.36344	2.1083	2.40848	1.5131	2.34199
ENSMUSG00000002550	Uck1	0	0	0	0	0	0	5.81294	0	0	7.81029	0	0	0	0	0
ENSMUSG00000002565	Scin	0	0	0	0	0	0	0	0	0	0	0	0	0	0	0
ENSMUSG00000002578	Ikzf4	0	0.00514313	0	0	0	0	0.0119116	0	0.007574	0.0113861	0.00536455	0	0.0378335	0	0
ENSMUSG00000002580	Mien1	5.03157	1.81815	1.53455	6.83676	10.2097	4.9697	3.20934	4.12898	3.23926	6.6099	6.95468	6.90639	11.0648	4.83255	3.29303
ENSMUSG00000002588	Pon1	0	0	0.0319298	0.0341032	0	0	0	0.0147622	0.010669	0	0	0	0	0	0
ENSMUSG00000002602	Axl	1.93245	1.99192	3.11822	3.79267	14.0309	17.2151	19.1894	7.96849	4.85619	2.93333	3.16301	1.5163	5.91162	5.64958	10.5346
ENSMUSG00000002603	Tgfb1	43.2853	49.0459	43.6961	37.9858	36.8218	40.082	27.6712	45.0679	57.8893	50.5127	48.9174	43.6742	40.0236	45.2388	39.7055
ENSMUSG00000002608	Ccdc97	16.0325	17.2209	12.9764	14.0462	12.7159	16.2377	15.9629	12.8796	17.9402	13.8757	23.0299	16.8671	14.0741	16.5208	12.7847
ENSMUSG00000002617	Zfp40	4.88649	2.86028	1.63708	1.69819	1.40072	3.5296	1.3108	1.65213	4.99404	2.54726	1.19174	2.24803	2.60789	2.25229	2.03463
ENSMUSG00000002625	Akap8l	5.63255	5.66059	5.40896	3.93043	5.6955	5.24084	3.85409	3.40882	4.81609	7.68861	6.69474	6.60766	5.80484	6.07377	6.93329
ENSMUSG00000002633	Shh	0	0	0	0	0	0	0	0	0	0	0	0	0	0	0
ENSMUSG00000002635	Pdcd2l	2.41872	3.92081	3.66206	3.07429	5.80536	1.704	5.96101	4.77385	9.1862	3.66099	24.2072	3.71541	6.19559	7.71373	6.03405
ENSMUSG00000002658	Gtf2f1	7.22593	5.87959	3.64123	2.82545	10.3299	8.16372	6.53721	10.1358	5.84658	4.8068	2.12305	2.7145	6.13697	4.91172	4.6468
ENSMUSG00000002660	Clpp	1.23782	1.34042	1.87753	3.09338	3.61511	3.52429	5.09048	1.86902	2.06752	2.8111	5.58993	3.48813	4.70582	3.64248	1.51851
ENSMUSG00000002661	Alkbh7	2.42071	0.0587616	0.0341679	1.63719	0.994746	1.69636	5.30503	1.25394	8.19698	3.69458	1.54419	1.48113	0.878253	1.89	1.26734
ENSMUSG00000002664	Pspn	0	0	0.0471053	0.135267	0.117112	0	0	0.120891	0	0	0	0	0	0.159509	0
ENSMUSG00000002668	Dennd1c	9.82085	4.41661	8.004	11.5565	11.2917	6.53488	6.55594	6.6611	15.3733	9.49461	9.46601	12.1702	15.624	10.2986	11.309
ENSMUSG00000002679	Med6	2.5725	4.55445	4.80776	4.54046	8.6824	5.23204	3.74279	4.22848	3.65156	5.20272	3.93991	4.20625	5.06021	4.7729	4.84312
ENSMUSG00000002688	Prkd1	0	0	0	0	0	0	0	0	0	0	0	0	0	0	0
ENSMUSG00000002699	Lcp2	55.5401	32.8804	41.1503	58.0913	53.128	41.3994	66.3824	51.1263	50.5327	46.7373	54.458	52.9112	46.6029	44.1291	44.6462
ENSMUSG00000002718	Cse1l	17.6461	36.4139	15.8992	15.9861	17.3745	25.1787	24.3023	22.6739	8.63612	9.06698	23.8526	6.78447	15.622	14.0203	8.57896
ENSMUSG00000002728	Naa20	4.12854	4.77587	6.86301	7.95356	5.91232	9.57844	11.1959	8.01212	4.19789	5.38041	8.74688	5.56242	4.93211	4.69402	6.39962
ENSMUSG00000002731	Prkra	3.52839	7.46762	5.35926	3.92672	4.03889	5.10652	5.72622	4.2875	8.07738	3.15729	3.56968	6.81557	4.07853	4.90965	3.98261
ENSMUSG00000002732	Fkbp7	4.26445	3.13087	4.94242	1.45402	3.99855	4.55626	2.6963	1.06266	7.35343	3.11431	1.91232	3.16601	2.45447	3.73826	1.81887
ENSMUSG00000002733	Plekha3	1.10365	1.16436	2.02728	0.756902	1.93638	4.70826	5.83067	1.01547	3.71244	1.70881	2.25894	2.41445	2.26804	1.23905	1.69286
ENSMUSG00000002741	Ykt6	8.41633	20.983	16.7247	12.0648	14.2827	9.83987	18.2928	9.67475	17.5737	10.6073	11.4167	11.3827	10.7729	10.1417	12.6613
ENSMUSG00000002748	Baz1b	9.90416	7.19821	12.5483	12.3513	14.9826	17.4569	11.2494	16.5839	9.48275	12.8917	9.93684	10.1619	11.6616	10.422	9.49308
ENSMUSG00000002763	Pex6	9.52017	0.427693	3.32541	5.78366	2.98698	2.58316	5.97694	2.18726	2.01828	4.0007	2.99944	2.90794	3.42718	3.38771	3.83751
ENSMUSG00000002767	Mrpl2	2.40725	0.327253	3.24301	3.95085	1.81262	3.92768	2.44779	2.15684	1.73451	2.51063	8.20921	2.88458	2.66535	5.45342	3.13365
ENSMUSG00000002768	Mea1	10.0171	3.39255	3.39975	2.86122	6.611	2.50977	3.35382	5.64611	8.3154	2.62203	1.95114	4.17304	4.92197	5.70732	4.66995
ENSMUSG00000002769	Gnmt	0	0	0.271789	0	0.321588	0.247226	0.112253	0.126792	0	0.563917	1.20464	0.0363548	0.144616	0.0780974	0.00753848
ENSMUSG00000002771	Grin2d	0.154017	0	0	0.0918797	0	0	0	0	0.191569	0.0738905	0.18273	0.252754	0.198204	0.474258	0.340792
ENSMUSG00000002778	Kdelr1	11.1845	11.6129	12.6565	12.2331	18.6479	17.7576	12.5042	24.7104	14.2317	17.1475	7.26508	11.992	9.67772	13.3416	11.5691
ENSMUSG00000002781	Tmem143	0.718525	1.68543	2.14147	3.21852	2.06818	2.2427	0.390237	3.66753	3.19397	3.38127	2.3786	2.93695	3.42496	2.18374	2.41604
ENSMUSG00000002791	Pdxk-ps	0	0	0	0.00563115	0.0263355	0	0.00560785	0.0399766	0	0.0267721	0.0844209	0	0.0138212	0	0
ENSMUSG00000002797	Ggct	1.34579	1.09958	0.685005	0.462902	1.5109	0.373507	1.56306	1.58321	1.46255	0.318456	0.932805	0.227807	0.555607	0.161347	0.821654
ENSMUSG00000002799	Jag2	1.69421	0.429328	0.618276	1.09685	1.14252	0.808014	0.60723	1.60939	3.14211	0.662394	1.53338	0.649526	1.25415	1.08448	0.975646
ENSMUSG00000002803	Btbd6	4.389	18.4263	3.78931	7.72319	5.96452	6.80832	11.8187	10.4703	10.3699	9.16015	13.3166	6.9864	6.36729	6.64783	5.47372
ENSMUSG00000002804	Nudt14	1.84195	4.29871	0.441575	3.65763	3.03	0.793093	0.670642	2.15882	0.118345	0.606217	1.69606	0.721246	2.70998	0.691958	1.63114
ENSMUSG00000002808	Epdr1	0	0	0	0.123152	0	0	0	0.341422	0	0	0	0	0.0196293	0	0
ENSMUSG00000002812	Flii	6.5773	11.5442	6.49551	8.60706	10.8177	7.20166	11.302	8.89633	8.63044	23.1397	21.2931	8.68676	9.33237	7.43269	9.40188
ENSMUSG00000002814	Top3a	2.19502	4.52555	5.02101	7.90206	3.2925	2.83883	4.73376	2.26469	3.75767	2.86481	11.5096	5.35919	5.07919	6.6524	2.54362
ENSMUSG00000002820	Atg4d	9.5293	3.51718	2.84692	4.20217	1.90415	2.4681	2.16384	5.13982	6.74967	3.12638	1.81299	2.28349	11.1814	3.71927	1.93406
ENSMUSG00000002825	Qtrt1	6.62288	2.44095	13.3184	20.3211	9.08207	9.61004	17.0719	8.49995	5.85907	15.7633	7.94923	7.35821	4.69604	9.63648	6.71747
ENSMUSG00000002831	Plin4	0	0	0	0	0	0	0	0	0	0	0	0	0	0	0
ENSMUSG00000002833	Hdgfl2	3.05005	4.64897	9.65054	8.02001	3.85304	2.38425	4.51563	2.78212	3.92321	3.55794	6.41636	8.28798	5.79913	2.55163	2.89261
ENSMUSG00000002835	Chaf1a	0	0	0	0	1.11963	0.934245	0	2.1649	0	0	0	0	0	0.795988	0
ENSMUSG00000002844	Adprh	14.5553	6.15101	5.53893	11.0802	9.66873	8.16018	7.67797	7.29359	16.3284	9.45698	8.41017	6.17467	7.40041	7.56044	9.55362
ENSMUSG00000002845	Tmem39a	22.5701	38.6472	11.6461	22.0741	34.9047	17.2853	22.6979	24.0065	33.7316	26.2314	14.5093	15.6303	23.8725	18.3054	29.8642
ENSMUSG00000002846	Timmdc1	2.71349	1.26973	2.40716	3.95001	3.77762	5.0483	3.66015	4.09586	3.54189	3.48368	2.36682	2.72877	2.01308	3.25934	2.96749
ENSMUSG00000002847	Pla1a	0	0	0	0.0197914	0	0	0	0	0	0.0647103	0	0	0	0.00634286	0.0460116
ENSMUSG00000002870	Mcm2	0	1.59536	0.231926	0.0705187	3.69229	2.94326	6.15977	4.16377	0.282994	0.514658	0.737228	0.371093	1.11207	0.725607	0.623733
ENSMUSG00000002871	Tpra1	4.37147	6.78742	3.50245	8.16089	4.89967	5.13323	4.76681	5.23011	5.68718	5.60927	7.14469	4.25708	5.55622	5.35395	4.23911
ENSMUSG00000002881	Nab1	4.90158	0.742832	0.859526	3.86045	3.43721	7.98068	11.4752	3.95165	6.31679	3.41113	1.19216	1.76603	2.5016	2.09586	2.15169
ENSMUSG00000002885	Adgre5	0	0	0	0	0	0	0	0	0	0	0	0	0	0	0
ENSMUSG00000002897	Il17ra	20.7037	24.3284	21.4951	28.8557	21.0718	18.2626	24.5502	23.6386	26.89	29.6355	25.08	26.7472	23.0639	22.5435	20.235
ENSMUSG00000002900	Lamb1	0	0	0.00757436	0.0328569	0.0127505	0	0	0	0	0.0742867	0	0.0175554	0.097815	0.0021925	0.00813144
ENSMUSG00000002908	Kcnn1	0.0748693	0	0.0652632	0.0237214	0.0484649	0.00671699	0	0	0	0.00632202	0	0.0113228	0.028772	0.264336	0.0120438
ENSMUSG00000002910	Arrdc2	0.655191	1.05131	1.22331	1.70672	0.51339	2.55472	0.525199	0.95351	0.837456	0.867103	6.68204	4.09807	1.5981	1.34177	2.87567
ENSMUSG00000002930	Ppp1r17	0	0	0	0	0	0	0	0	0	0	0	0	0	0	0
ENSMUSG00000002944	Cd36	0.0194898	0	0	0	2.24582	1.95661	1.13921	1.57118	0.00584034	0.199601	0	0	0.0492977	0.0222023	0.138152
ENSMUSG00000002948	Map2k7	6.09884	7.99785	5.06718	5.27503	6.40908	5.12667	8.66205	5.96303	6.91285	6.08956	3.75865	6.70027	4.19909	5.56829	7.6843
ENSMUSG00000002949	Timm44	11.9716	3.31502	6.96525	9.2985	5.96335	7.16644	8.4873	4.60608	4.18657	6.64777	4.8759	8.08137	9.21276	5.17986	4.33769
ENSMUSG00000002957	Ap2a2	3.2205	4.54349	5.2765	3.52649	6.45635	5.49847	4.52585	5.23422	8.39454	2.85635	2.67146	6.59074	4.43935	4.63049	6.06295
ENSMUSG00000002963	Pnkp	9.97071	5.24209	0.572505	2.09108	9.22184	5.89725	1.29671	1.74737	4.27468	2.69195	9.25587	3.1566	9.01553	3.09565	2.43244
ENSMUSG00000002968	Med25	30.5444	6.26983	5.39152	3.81807	6.67712	4.28739	4.62144	5.22589	7.74234	3.13838	7.42768	3.94692	9.31342	4.58788	4.44743
ENSMUSG00000002980	Bcam	0	0	0	0	0.020958	0	0	0.167545	0	0.0107145	0	0.212514	0.0687558	0.00574848	0.0184016
ENSMUSG00000002981	Clptm1	19.1923	29.5271	36.4309	17.1224	54.1531	38.6077	33.6204	49.6222	37.5347	29.5668	28.6086	38.4606	32.6292	34.2101	30.9108
ENSMUSG00000002983	Relb	0.330984	0.982607	0.240745	1.36437	2.10625	0.815967	1.77151	0.44255	0.892646	2.16633	1.3472	0.99504	1.60286	1.73567	1.60096
ENSMUSG00000002984	Tomm40	1.55379	0.651684	3.39558	3.74228	5.72392	9.49082	15.7199	4.80413	3.0567	3.80971	3.39246	3.1843	6.0116	3.7951	3.36743
ENSMUSG00000002985	Apoe	42.3577	41.7675	47.1418	28.7043	72.863	69.1016	48.3587	99.0385	25.3057	38.6355	25.5128	43.8857	48.9418	79.4168	99.5762
ENSMUSG00000002992	Apoc2	0	0	0	0	0.412997	0.205124	0	1.03679	0	0	0	0	0	0.316539	0.152547
ENSMUSG00000002996	Hbp1	10.3604	12.8623	16.8766	7.1832	5.17148	5.01928	0	8.79382	8.52271	5.69196	15.0847	6.68192	5.80872	7.02487	7.88001
ENSMUSG00000002997	Prkar2b	0	0	0	0.0379641	0.017739	0.0477564	0	0.0144458	0	0	0	0.0109996	0.0178731	0.0383515	0.109869
ENSMUSG00000003031	Cdkn1b	5.6922	10.0018	7.97744	5.32255	4.85317	4.27941	2.59054	6.9742	8.20179	5.24346	4.31041	6.68726	5.29016	7.23617	5.42894
ENSMUSG00000003032	Klf4	0.141679	1.69686	0.433766	0.102399	0.795676	0.576077	2.04297	0.768326	0.0341923	0.21195	0.0282355	0.15129	0.493219	0.499946	0.622096
ENSMUSG00000003033	Ap1m1	5.6869	6.95881	6.40831	5.81286	9.00442	8.17563	6.31429	12.8418	13.7768	7.97298	6.92246	5.5677	9.5845	8.3552	8.27386
ENSMUSG00000003037	Rab8a	2.66733	8.82705	2.66623	2.1079	7.52176	3.70372	2.36556	4.19774	3.9799	2.75225	2.4997	4.29106	6.1276	3.54032	3.18393
ENSMUSG00000003038	Hmgn2	0.741035	1.12797	1.12126	5.99008	2.34361	6.16627	1.76258	5.839	1.41132	3.03578	2.21889	1.3549	2.66435	4.38098	2.17232
ENSMUSG00000003039	Fam32a	1.6619	3.67898	6.40105	3.98567	4.14246	4.80819	2.22776	2.94089	3.76439	3.01235	2.15028	4.28422	2.90646	4.41012	3.83037
ENSMUSG00000003051	Elf3	0	0	0	0	0	0	0	0	0	0	0	0	0	0	0
ENSMUSG00000003053	Cyp2c29	0	0	0	0	0	0	0	0	0	0	0	0	0	0	0.101455
ENSMUSG00000003062	Stard3nl	9.87388	25.5781	20.7237	18.561	13.6247	14.5751	18.3995	16.3878	25.7332	26.5546	9.79944	16.4637	20.2609	21.584	16.2317
ENSMUSG00000003068	Stk11	15.8103	6.86083	16.9129	7.12642	30.8704	22.5669	18.8623	17.015	21.6454	17.2955	18.887	16.2542	13.9613	20.1657	16.2526
ENSMUSG00000003070	Efna2	0	0	0	0.157351	0	0.0283022	0	0	0.00897376	0	0.0320157	0	0	0	0
ENSMUSG00000003072	Atp5d	11.6454	14.9674	13.4913	26.7802	35.466	29.1839	20.8786	29.5491	19.7749	18.0641	17.1524	17.6922	16.6011	18.1687	20.3526
ENSMUSG00000003099	Ppp5c	8.31317	28.5027	20.7142	16.5795	17.1877	17.6658	12.1885	15.1622	25.7807	16.7808	17.8633	21.5657	29.4154	18.3162	17.1339
ENSMUSG00000003119	Cdk12	11.0055	12.6621	11.6503	7.42616	11.0424	14.2479	10.4781	10.0627	11.1249	9.00708	11.5383	10.9084	11.434	11.545	9.88169
ENSMUSG00000003123	Lipe	4.19446	8.25784	10.8455	5.7814	5.82975	5.49012	7.53784	3.87624	14.0971	10.5145	11.678	11.9805	8.65701	6.7432	4.31412
ENSMUSG00000003131	Pafah1b2	2.97077	5.31126	5.47947	5.31635	5.07587	5.04512	6.27289	4.64798	4.67493	5.47388	8.19945	6.29941	5.03063	4.31404	4.32326
ENSMUSG00000003134	Tbc1d8	6.13618	5.25948	5.42261	6.27209	5.31906	6.29852	3.70436	4.02588	6.94637	14.7213	17.7425	4.93948	5.75688	6.18548	8.48869
ENSMUSG00000003135	Cnot11	3.56802	5.86672	6.67471	7.49691	4.30027	5.6899	5.53572	4.14299	5.34901	5.26652	6.1293	3.21331	5.83811	4.42932	5.28494
ENSMUSG00000003153	Slc2a3	1.58156	3.9532	1.39439	0.913072	1.429	3.09432	1.15042	2.08918	0.134481	0.673879	0.0891906	1.18126	0.442205	0.925647	1.21201
ENSMUSG00000003154	Foxj2	15.0295	4.72108	9.48377	8.6833	8.55083	9.3924	8.80917	7.49174	10.2387	8.54938	12.5037	10.6556	10.5449	11.2481	9.52171
ENSMUSG00000003161	Sri	16.7718	16.5013	13.1834	13.0308	21.2645	16.5049	16.9404	18.6228	18.5851	10.9566	8.27322	17.2253	9.31875	12.4261	15.5466
ENSMUSG00000003166	Dgcr2	0.45897	3.21884	2.36862	2.23217	3.5602	5.02877	4.72821	3.82401	3.17063	5.04167	1.97914	3.56945	2.57156	3.49598	3.05524
ENSMUSG00000003184	Irf3	54.8421	36.4796	46.8218	55.7837	49.4694	38.7871	52.1889	32.6705	50.1782	53.3719	39.91	47.1456	53.9653	46.2007	43.2243
ENSMUSG00000003190	Bcl2l12	5.43255	5.95556	0	0	0	0	0	0	0	0	0	0	0	0	0
ENSMUSG00000003198	Zfp959	0.806632	1.80946	1.14693	0.833592	0.661063	1.1974	0.572367	0.926741	1.12953	2.33296	1.5359	0.993995	1.01498	1.66035	1.28551
ENSMUSG00000003199	Mpnd	3.44329	0	0	1.85228	4.79331	0	2.75791	1.43804	0	3.45092	3.76468	0	1.77913	0	2.85193
ENSMUSG00000003200	Sh3gl1	5.56379	14.1378	8.3945	5.68321	9.45972	10.5491	4.41464	4.5146	10.8246	5.37664	5.41488	10.6038	5.98359	8.43826	5.9409
ENSMUSG00000003206	Ebi3	5.43944	5.93577	2.84117	6.55535	5.22326	12.028	7.28467	2.61294	5.66959	4.49335	5.28158	3.88174	6.99782	4.03453	5.88139
ENSMUSG00000003208	Ccdc94	5.0956	0	0.701955	0	1.68654	1.9192	3.21308	1.16076	0	1.01345	0.955457	0.779036	0.939168	0.728949	0.849427
ENSMUSG00000003226	Ranbp2	9.153	5.65236	6.87165	9.44336	12.1392	12.0217	16.5009	15.4376	10.0331	7.33996	8.07768	7.02934	5.02219	7.07288	8.05961
ENSMUSG00000003227	Edar	0	0	0	0	0	0	0	0	0	0	0	0	0	0	0
ENSMUSG00000003228	Grk5	0.0194982	0.298292	0.112993	0.636135	0.363953	0.433759	0.00423313	1.24962	1.03926	0.568699	0.38767	0.867431	0.320109	0.366378	0.336893
ENSMUSG00000003233	Dvl3	8.44778	3.76072	6.06668	3.75185	6.36571	6.45031	7.37102	6.4192	4.05898	4.77387	14.3866	6.54909	6.61969	6.15315	4.96575
ENSMUSG00000003234	Abcf3	16.0927	7.71335	9.29337	12.2849	10.294	5.65044	8.75818	9.89814	13.8216	8.88756	12.8565	8.75476	5.19186	7.82613	6.65451
ENSMUSG00000003235	Eif2b5	4.84059	1.79976	1.86762	1.95242	4.69642	2.70806	7.74499	1.53316	1.70667	3.17842	6.73231	2.52119	3.90138	3.98244	3.58549
ENSMUSG00000003269	Cyth2	7.49145	14.8572	5.71464	10.4591	6.46807	3.97576	2.89299	7.64096	3.95092	9.46069	8.29694	9.52736	6.28631	6.18812	8.12362
ENSMUSG00000003271	Sult2b1	1.51042	6.0801	1.06844	0.22123	0.237175	0.110749	1.67331	0.559925	0.455809	0.732687	2.33992	2.67422	3.55272	0.456988	1.45649
ENSMUSG00000003273	Car11	7.95125	0.22762	0.0311491	0	0.104123	0.14504	0	0	0.345741	0.748445	0.172133	0.151353	0.419913	0.338362	0.419588
ENSMUSG00000003279	Dlgap1	0	0.00804527	0.00151891	0	0.113114	0.00232063	0	0	0.0183098	0.441003	0	0.0260853	0.174178	0	0.028302
ENSMUSG00000003282	Plag1	0.684324	1.02397	1.60126	0.952171	0.5087	0.71366	1.12831	1.95751	1.18495	1.13985	0.705399	1.94201	1.05408	0.892613	1.14425
ENSMUSG00000003283	Hck	11.1458	18.3377	15.3723	16.7341	17.5439	21.4102	16.8816	15.3679	17.2151	13.9328	15.1165	13.5835	18.5382	13.7993	16.1546
ENSMUSG00000003299	Mrpl4	17.3413	23.3505	3.93713	5.50574	7.85908	7.81574	7.0837	7.06227	8.08599	4.88898	5.77896	3.37296	5.14302	5.73514	5.84751
ENSMUSG00000003308	Keap1	2.65919	3.91329	1.97966	1.05786	2.06816	4.8468	1.3027	2.00587	1.66511	2.15031	2.52599	6.50621	1.99722	1.90836	1.42573
ENSMUSG00000003309	Ap1m2	0	0	0.0179742	0	0	0	0	0	0	0	0	0	0	0	0
ENSMUSG00000003316	Glg1	8.44487	8.11744	8.64668	10.4452	8.6426	8.70475	8.39874	9.84127	12.1156	8.48087	9.17394	7.70118	9.61064	10.0604	7.61378
ENSMUSG00000003341	Atp8b3	0	0	0	0	0	0	0	0	0	0	0	0	0	0	0
ENSMUSG00000003344	Btbd2	0.86579	2.14388	3.17799	3.3006	3.42972	4.32691	1.3202	3.36164	1.71158	2.14758	8.97125	2.80754	1.99531	3.59192	6.43064
ENSMUSG00000003345	Csnk1g2	7.30442	36.4227	2.75724	6.49788	9.83583	9.01342	3.03202	8.86981	20.414	9.74622	24.4028	14.8785	5.70441	5.04685	11.256
ENSMUSG00000003346	Abhd17a	6.10985	2.08975	2.31595	1.83946	5.25134	3.82187	2.6893	2.49288	4.32055	1.70018	9.85341	2.58036	6.07555	2.94589	2.63795
ENSMUSG00000003348	Mob3a	18.8552	4.65981	6.87245	17.9446	2.82474	5.1952	10.4244	3.45832	6.41828	4.88024	4.11406	4.37749	5.66464	4.70621	10.2797
ENSMUSG00000003352	Cacnb3	0	0	0	0.0368353	0	0	0	0	0	0	0	0	0	0	0
ENSMUSG00000003354	Ccdc65	0	0	0	0	0	0	0	0	0	0	0	0	0	0.0127157	0.0363401
ENSMUSG00000003355	Fkbp11	0	0	0.420894	0	0.570253	0.0200821	0.0796716	2.64166	0.376852	0.0377456	3.54081	0	0.109389	0.429341	0.00951807
ENSMUSG00000003360	Ddx23	1.96601	3.34373	4.10774	3.53781	5.80622	3.7983	4.04346	4.77269	6.34963	3.83031	5.03296	3.4131	4.90662	4.74596	6.31589
ENSMUSG00000003363	Pld3	5.13187	26.4757	13.0812	13.5396	28.9805	24.798	19.8521	22.0453	14.3	23.7631	17.1103	26.5638	24.3572	21.233	31.1648
ENSMUSG00000003378	Grik5	0.0436494	0.0234013	0.0929177	0.119893	0.869231	0.929107	0	1.16415	0.0842402	0.0313482	0.0892875	0.0615624	0.00747852	1.69897	0.252519
ENSMUSG00000003379	Cd79a	0.0208454	0	0	0.0272621	0.0752339	0.0727381	0	0	1.56163	0.310443	0	0.0961744	0.436357	0.0263751	0.0802088
ENSMUSG00000003380	Rabac1	27.9183	7.44931	26.0163	26.1892	20.0705	13.9134	9.79758	12.8683	22.7086	25.9868	19.8177	22.6165	26.1066	23.2839	14.7637
ENSMUSG00000003382	Etv3	9.22196	6.69914	5.34584	8.72845	12.4098	9.01381	13.2586	11.5363	10.942	9.716	8.8367	11.1963	8.27807	8.90312	8.20481
ENSMUSG00000003402	Prkcsh	8.99875	5.73725	4.45989	8.07496	9.25183	8.24086	5.67242	9.46178	6.06122	7.92322	9.23513	5.59668	6.87189	7.58765	5.95631
ENSMUSG00000003410	Elavl3	0	0	0	0	0	0	0	0	0	0	0	0	0	0	0
ENSMUSG00000003411	Rab3b	0.0144626	0	0	0.276976	0	0	0	0.445591	0	0	0	0.184624	0.0110923	0.0153446	0
ENSMUSG00000003418	St8sia6	0.732194	1.12306	1.68348	4.38138	1.27381	1.24061	0.762511	1.60582	4.8237	3.05008	6.02177	1.38677	1.68335	1.57052	1.2501
ENSMUSG00000003420	Fcgrt	2.87425	3.44097	6.5474	8.23902	8.69073	6.23271	6.47968	8.007	5.62383	6.05283	3.98767	7.09335	9.00128	8.65578	8.53449
ENSMUSG00000003421	Nosip	7.08784	0	1.52518	5.25831	4.66768	18.3296	1.45811	2.64481	18.6016	4.24627	4.7575	13.0044	2.8258	10.1935	9.41229
ENSMUSG00000003423	Pih1d1	6.14235	17.764	12.6955	8.20544	9.21949	5.35433	9.74966	4.9602	18.3342	16.5224	23.2814	15.8916	9.20256	3.3772	12.2993
ENSMUSG00000003429	Rps11	43.9314	30.7427	36.9146	30.9305	73.8905	63.3128	65.6535	75.3273	30.4035	33.1926	29.7924	31.2009	47.4472	51.5771	57.7169
ENSMUSG00000003435	Supt5	11.6683	3.51726	15.0044	5.99955	10.1298	6.38251	6.55791	14.0359	5.8571	5.92474	22.0558	6.78293	6.4843	7.53004	6.17538
ENSMUSG00000003436	Dll3	0	0	0	0	0	0	0	0	0	0	0	0	0.018911	0	0
ENSMUSG00000003437	Paf1	29.954	28.3189	8.25708	4.05346	9.10031	7.57673	8.68093	7.82935	8.56755	6.24736	8.56312	5.55014	6.40046	6.36638	11.5032
ENSMUSG00000003438	Timm50	4.51726	8.00135	1.67687	3.12674	9.10445	6.54533	4.18705	4.59146	1.62559	8.29924	10.1996	8.22579	9.97069	3.8714	3.14533
ENSMUSG00000003444	Med29	0	0	0	0	0	0	0	0	0	0	0	0	0	0	0
ENSMUSG00000003452	Bicd1	0.00119837	1.25836	0.0200825	0.00347109	0.111309	0	0.0214885	0.0355007	0.0271076	0.00308927	0.0904352	0.00670272	0.0554508	0.00924763	0.00839669
ENSMUSG00000003458	Ncstn	21.9017	21.3652	23.2058	23.6833	30.3304	22.4821	19.6613	35.3031	26.6506	21.4215	23.9891	23.1274	21.1351	28.5845	29.762
ENSMUSG00000003464	Pex19	2.55061	6.50341	4.89697	6.47831	4.83861	4.3894	5.40896	4.27706	5.62781	8.70962	12.9961	3.78194	6.13697	7.62764	5.08542
ENSMUSG00000003469	Phyhip	0	0	0	0	0	0	0	0	0	0	0	0	0	0.0370725	0
ENSMUSG00000003476	Crhr2	0	0	0	0	0	0	0	0	0	0	0	0	0	0.0375442	0.0236284
ENSMUSG00000003477	Inmt	0	0	0	0	0	0	0	0	0	0	0	0	0	0	0
ENSMUSG00000003484	Cyp4f18	0	0	0	0	7.75962	2.61442	0.475921	4.0502	0	0	0	0	0	1.35847	1.90042
ENSMUSG00000003500	Impdh1	0.0596204	0	0.0190026	0.142832	0.349568	0.0477425	0.707013	0.21409	0.2527	4.47502	0	0.146747	0.156513	0.150194	0.318877
ENSMUSG00000003505	Psg18	0	0	0	0	0	0	0	0	0	0	0	0	0	0	0
ENSMUSG00000003518	Dusp3	4.57429	29.7119	7.01878	22.2963	24.3855	21.0986	22.432	10.3582	25.1973	21.3558	22.5054	12.3401	15.2127	4.99857	11.3255
ENSMUSG00000003526	Prodh	1.38438	0.128048	0.198176	0.699112	0.916455	0.311069	1.39265	1.12729	1.30612	4.70352	0.222247	1.0157	4.18222	0.938355	1.27708
ENSMUSG00000003527	Dgcr14	0.613974	2.68051	2.5149	2.78382	2.24228	2.30142	1.67567	2.22372	3.0648	1.86455	4.89888	1.42558	2.26531	2.33221	2.38001
ENSMUSG00000003528	Slc25a1	5.31697	8.14159	4.98086	6.66268	5.91516	4.20522	3.46006	4.01728	8.57338	5.19586	5.39216	3.42328	7.59719	5.54129	3.22917
ENSMUSG00000003531	Dgcr6	2.30372	1.47198	1.08952	0.379402	0.927232	2.88945	0.742313	1.63551	1.63223	0.838554	0.390848	0.703837	1.04399	1.19256	0.500541
ENSMUSG00000003534	Ddr1	0	0	0	0	0	0.108214	0	0	0	0	0	0	0.0107831	0	0.0688058
ENSMUSG00000003541	Ier3	1.28127	0.554683	0.392436	2.46809	4.60819	0.803295	7.25046	2.37351	3.63103	3.31274	2.94032	3.30169	3.56397	1.19598	1.47657
ENSMUSG00000003545	Fosb	0	0	0.0295656	0	0	0	0	0	0	0	0	0	0	0.198368	0
ENSMUSG00000003546	Klc4	0.770139	1.27068	2.16761	3.27367	2.65646	3.38468	0.757786	1.61896	3.82643	1.56835	2.34059	1.36744	4.20406	3.93105	3.20326
ENSMUSG00000003549	Ercc1	3.35137	0	2.9823	2.07472	3.12585	1.75003	3.49138	1.89854	5.05864	1.35924	8.58553	5.0663	5.51821	3.13968	7.3755
ENSMUSG00000003555	Cyp17a1	0	0	0	0.682335	0.200785	0	0	0	0	0	0	0	0	0.023512	0
ENSMUSG00000003559	As3mt	3.47764	4.99547	4.4946	3.9535	2.58539	3.2353	6.00903	2.94129	2.0074	3.83811	2.33761	3.30441	3.85173	3.77927	3.97142
ENSMUSG00000003573	Homer3	0	2.80449	1.22655	0.833653	10.2538	2.08578	1.00992	1.18668	0.623532	9.22627	3.22677	4.51998	1.22791	1.79325	1.25783
ENSMUSG00000003575	Crtc1	15.8803	5.9244	3.46052	2.94348	2.6667	2.77361	7.90759	1.38885	12.5709	4.52728	3.53181	1.98689	1.47553	4.48178	5.44782
ENSMUSG00000003581	Rnf215	3.75961	3.52366	5.52952	3.70097	6.3133	2.39096	3.61019	1.76647	4.25466	4.04184	1.99026	4.92021	6.9092	4.52136	3.10389
ENSMUSG00000003585	Sec14l2	0.130848	0.00692704	1.23647	0.0932107	0.769693	1.13591	0.550712	0.881181	0.424824	0.328507	0.264107	1.04836	1.09709	0.679461	2.40977
ENSMUSG00000003604	Aven	0.0823942	2.84457	0.330485	0.560335	0.296596	1.58841	0.764727	0.203215	0.298214	0.488817	0.425765	1.45558	0.263271	0.610908	0.532064
ENSMUSG00000003617	Cp	0	0	0	0	0	3.23824	0	0	0	0	0	0	2.87995	0	0
ENSMUSG00000003623	Crot	9.65923	7.99175	7.04065	13.2765	7.90924	7.15767	8.08286	8.0811	5.87865	8.92908	7.3035	11.6825	6.48489	9.31141	9.82159
ENSMUSG00000003644	Rps6ka1	26.9622	25.723	35.4436	29.2674	35.0842	30.0742	37.8111	32.3022	35.0931	33.908	39.9762	40.2747	38.2733	32.026	31.5266
ENSMUSG00000003657	Calb2	0.747575	0	0	0.018846	0	0	0	0	0	0	0	0	0.0255178	0.00902571	0.334898
ENSMUSG00000003660	Snrnp200	6.54106	7.77756	6.18689	6.11526	8.05847	7.2964	6.93583	6.74028	6.1219	5.3374	3.78681	5.18292	5.61816	5.2946	5.21208
ENSMUSG00000003662	Ciao1	3.54792	15.0281	2.92145	4.3991	7.06735	4.10973	4.26438	2.0945	3.3977	5.59505	4.63794	4.08622	2.6025	4.06242	3.7409
ENSMUSG00000003665	Has1	0	0	0.0205627	0.0509986	0	0.385947	0	0	0	0	0	0	0.0258316	0.0900517	0
ENSMUSG00000003680	Taf6l	14.452	20.8172	23.8459	20.2627	27.9484	26.8269	18.7892	23.4939	21.1985	16.3755	17.2129	15.8148	18.2173	21.3636	18.6139
ENSMUSG00000003721	Insig2	14.2301	16.7387	7.76499	3.82125	8.75561	8.02599	9.37986	6.78513	11.8248	4.78192	5.3532	8.08674	8.64359	7.19228	7.9669
ENSMUSG00000003731	Kpna6	5.15509	3.65057	7.18963	4.17625	5.27145	4.31991	4.28561	4.61997	3.60514	3.03414	6.63639	4.20015	4.42826	4.76468	3.00638
ENSMUSG00000003746	Man1a	14.7892	21.3359	18.153	27.3621	21.299	18.0949	33.7637	18.7946	13.9729	13.6168	22.7529	17.4762	14.8542	14.0065	16.3228
ENSMUSG00000003752	Itpkc	0	3.2446	0	0	0	0	0	0	0	2.56518	0	0	3.36809	1.74186	0
ENSMUSG00000003762	Coq8b	2.02627	4.33264	2.32184	2.19102	4.29535	5.60025	3.82739	3.65226	4.75609	3.3998	4.44656	3.11808	5.30916	5.10565	7.39643
ENSMUSG00000003778	Brd8	6.32505	9.95982	14.1472	10.1466	12.3136	10.3689	12.592	15.8635	12.6522	11.3348	12.7134	14.642	13.3525	13.7555	11.2972
ENSMUSG00000003779	Kif20a	0	0	0	0	3.07278	3.86716	0	5.76567	0	0	0	0	0.716926	2.16543	0.66327
ENSMUSG00000003808	Farsa	7.4705	4.32993	3.8672	3.58284	7.42455	4.63041	8.08917	4.76047	2.91342	6.11592	5.00247	3.84807	5.82525	5.69588	4.19643
ENSMUSG00000003809	Gcdh	2.53547	0.196911	0.781072	1.8038	3.6902	3.43305	0.433953	3.52114	5.77449	4.01393	0.642191	1.12198	3.1021	4.07952	1.74076
ENSMUSG00000003810	Mast2	6.93679	4.33867	4.72739	4.32134	9.8645	4.75441	4.97187	5.01322	2.61374	2.12628	2.64234	3.21269	3.04319	2.82286	2.15591
ENSMUSG00000003812	Dnase2a	36.9785	3.78583	5.52712	12.0466	5.06143	5.45446	4.95469	18.6896	24.3443	13.5697	8.16331	3.29879	15.6333	15.65	15.5971
ENSMUSG00000003813	Rad23a	13.9953	3.59279	4.94963	9.46538	7.45871	5.70093	5.67951	9.43266	5.04376	9.85243	3.15232	4.06477	6.13476	4.58703	4.73386
ENSMUSG00000003814	Calr	43.851	130.854	113.76	88.3656	151.524	134.868	105.996	193.989	68.7574	80.2102	71.2006	71.8726	80.2414	65.5502	61.5396
ENSMUSG00000003824	Syce2	0.00849639	0.420064	1.88625	0.037869	1.88505	1.17495	1.8617	1.92562	2.03156	0.866147	0.858682	0.963218	0.850106	1.57174	0.499994
ENSMUSG00000003847	Nfat5	12.4587	8.74763	9.29227	11.6309	8.54028	8.99228	8.86267	7.26131	11.1999	10.9157	13.1654	10.1691	8.26306	10.7807	10.2315
ENSMUSG00000003848	Nob1	0.64313	2.45352	3.78778	1.97422	4.73033	3.43545	2.4539	1.98385	2.07247	1.95475	2.1577	2.43108	1.92473	1.49276	1.69952
ENSMUSG00000003849	Nqo1	0	0	0	0	0	0	0	0.21915	0	0	0	0.0113476	0	0	0
ENSMUSG00000003863	Ppfia3	0.00533616	0.278681	0.0191632	0	0.241458	0.419174	2.1364	0.244511	0.0178704	0.0681362	0	0.044523	0.073301	0.245384	0.711352
ENSMUSG00000003865	Gys1	0.866069	0	0	0	0.985737	0.678524	0	0.953411	0.421561	0	0	0	1.32866	0.642756	0.463183
ENSMUSG00000003868	Ruvbl2	14.6442	19.7129	20.0853	6.10054	7.61746	15.2571	11.9991	12.0375	8.27081	7.88448	7.43383	12.036	3.86391	9.28366	9.82848
ENSMUSG00000003872	Lin7b	0	0	0.0551768	0	1.37915	0	0	0	0.444235	0	0	0.148385	0.635125	0	0
ENSMUSG00000003873	Bax	0	7.2496	11.2899	4.98673	13.6818	27.401	7.68469	8.19397	16.9093	0	4.60112	0	9.65717	0	7.20926
ENSMUSG00000003882	Il7r	9.29043	13.0656	8.18438	6.85514	3.74646	7.35373	2.11699	2.44087	6.90453	6.44322	6.88626	9.60717	6.39811	9.19183	5.39537
ENSMUSG00000003923	Tfam	0.409267	1.57628	5.07322	2.61418	0.73739	1.22887	2.46201	1.31494	2.47213	1.72115	3.09819	1.38883	1.02821	0.939249	0.991287
ENSMUSG00000003929	Zfp81	1.0227	0.557946	1.33324	1.14324	0.778712	0.939141	0.84632	1.03561	0.747524	1.32947	1.01454	1.42955	1.52878	1.03256	1.15417
ENSMUSG00000003934	Efnb3	0.158083	0	0	0	0.09534	0	0.16922	0.0648197	0.231822	0.0372981	0	0	0.087937	0.0606858	0.00210307
ENSMUSG00000003948	Mmd	5.37461	1.06012	2.56284	1.81791	5.63512	7.1995	1.84102	5.05127	3.4754	1.05853	4.7888	2.10845	2.63689	4.90428	2.35577
ENSMUSG00000003949	Hlf	6.90034	2.82449	3.05718	8.80775	0.681084	0.726013	6.97006	0.818897	2.0008	14.359	3.75185	2.2545	1.48178	2.98606	2.60727
ENSMUSG00000003955	Fam162a	1.63486	0.334214	2.54406	1.94461	4.58381	6.41482	3.87771	5.67917	1.8994	1.70518	10.1681	1.60759	1.05031	2.4467	2.83147
ENSMUSG00000003970	Rpl8	21.202	12.3589	24.7744	33.051	88.0146	64.2965	74.4908	74.6971	35.7875	38.5942	31.6987	28.0422	38.8451	43.3386	44.17
ENSMUSG00000003974	Grm3	0.013268	0.372857	0.00255853	0.178068	0.0976876	0.00789863	0.587922	0.0552036	0	0	0.00366136	0.173973	0.0252956	0.0683632	0.0477554
ENSMUSG00000003992	Ssbp2	9.81774	5.68366	12.8096	8.25826	8.68075	15.9892	11.4677	8.80358	21.0842	17.0126	3.23713	25.1494	8.7128	14.6523	13.4311
ENSMUSG00000004018	Fancl	0	4.66829	0	2.1488	0	1.09245	1.0687	0	0	0	3.46817	1.10973	1.59988	0	1.10418
ENSMUSG00000004031	Brinp2	0.00350099	0	0	0	0	0	0	0	0	0	0	0.0167686	0	0.0060861	0
ENSMUSG00000004032	Gstm5	4.91822	2.71647	0.124629	0.881349	1.69329	1.75821	0	1.56645	0.331561	0.51248	3.09595	1.09698	1.64888	1.062	1.614
ENSMUSG00000004035	Gstm7	0	0.052994	0.0146735	0.0959928	0.150699	0	0	0.133911	0.321619	0.211662	0	0	0.146334	0.0916948	0.00444993
ENSMUSG00000004038	Gstm3	0	0	0	0	0	0	0	0	0	0	0	0	0	0	0
ENSMUSG00000004040	Stat3	10.6995	19.8621	9.30805	11.7328	25.645	17.4924	23.8384	18.2074	16.6979	13.346	10.2318	11.9137	14.0247	11.002	14.5052
ENSMUSG00000004043	Stat5a	0	0	0	0	0	0	0	0	0	0	0	0	0	0	0
ENSMUSG00000004044	Cavin1	0	0	0	0	0.0047017	0.00397987	0	0	0.105074	0.0113429	0	0	0	0.0743044	0.0168305
ENSMUSG00000004054	Map3k11	7.41209	15.0233	7.64827	9.47605	9.04815	7.31207	32.0676	8.48052	11.9222	8.97236	9.62006	7.80834	14.7971	8.92457	9.95834
ENSMUSG00000004056	Akt2	11.0266	4.68083	8.21871	7.87307	7.54885	5.28612	6.95908	12.1602	9.27992	5.75729	2.96277	5.0073	8.75231	10.1535	5.53454
ENSMUSG00000004069	Dnaja3	2.30609	2.59506	3.66181	0	0	0	7.59556	4.03885	0	5.77121	2.0773	0	0	0	0
ENSMUSG00000004070	Hmox2	10.8284	8.0485	8.38717	11.3247	9.13198	10.1848	7.41405	9.90885	10.1319	10.9136	13.1886	6.76918	11.0609	9.46095	9.10268
ENSMUSG00000004071	Cdip1	6.63409	7.00919	4.47742	6.38975	5.95911	4.2322	5.01989	3.07127	6.72165	6.24757	7.23593	4.72765	5.06796	6.84052	5.46927
ENSMUSG00000004085	Map3k20	0.822108	0.588322	1.08553	0.6369	1.01973	1.12348	1.49111	1.38092	0.710698	1.03065	0.646481	0.703466	0.846807	1.34875	1.30167
ENSMUSG00000004096	Cwc15	17.2518	12.1769	12.2862	12.3205	10.9187	10.6679	12.547	12.1389	16.4093	11.8332	11.8769	12.4322	9.866	13.175	13.5173
ENSMUSG00000004098	Col5a3	0	0	0	0	0	0	0	0	0	0	0	0	0	0	0
ENSMUSG00000004099	Dnmt1	3.61576	3.201	7.30474	6.68751	3.81111	5.7321	2.59545	17.5384	16.4978	1.93352	2.20816	3.33847	6.36383	6.2752	4.56139
ENSMUSG00000004100	Ppan	4.46377	15.3682	4.13393	2.8911	7.24498	7.73367	9.90444	3.71283	3.91993	5.64558	2.65171	5.13234	3.65722	4.27596	5.34743
ENSMUSG00000004105	Angptl2	0.854623	2.06519	1.17976	1.22415	0.794677	1.91291	2.83344	0.692398	0.441052	1.52467	1.94333	1.37338	1.00786	1.29336	1.16251
ENSMUSG00000004110	Cacna1e	0	0.177793	0.00312956	0.209317	0.0182986	0.111644	0	0.352264	0.15016	0.147842	0	0.0045235	0.0653861	0.0411267	0.0642112
ENSMUSG00000004113	Cacna1b	0	0	0.00179337	0	0	0.0056539	0	0	0.00166667	0	0	0	0	0.0309168	0.0231706
ENSMUSG00000004127	Trmt10a	0.215987	2.19201	0.930718	0.212678	1.26899	1.21124	0.720136	1.08854	0.529893	1.33692	0.749782	0.50812	0.526889	1.28129	1.51422
ENSMUSG00000004151	Etv1	4.45752	4.14517	4.43416	2.48986	1.61795	2.00848	1.96334	1.93434	2.41029	3.29439	1.84066	2.74785	2.59069	1.99371	2.36628
ENSMUSG00000004187	Kifc2	0.0950003	0.00607239	0.00945607	0.830463	0.689793	0.219174	1.0783	0.0972727	0.251698	0.516252	0.099282	0.376015	0.212826	0.260701	0.24665
ENSMUSG00000004207	Psap	119.025	160.012	168.682	130.773	198.297	196.246	150.143	130.274	127.755	108.571	132.529	117.531	139.008	179.615	172.842
ENSMUSG00000004221	Ikbkg	0.954699	2.1175	3.01593	1.74317	2.36372	0	1.82021	1.52403	2.31835	1.14125	3.19061	2.33336	1.84782	2.87183	1.40508
ENSMUSG00000004231	Pax2	0	0	0	0	0	0	0	0	0.0097099	0	0	0	0	0	0
ENSMUSG00000004233	Wars2	1.45269	2.22378	4.05681	2.7903	2.02681	1.93243	2.68902	1.74079	5.13344	2.17699	1.03855	3.97264	1.82885	2.02101	1.65207
ENSMUSG00000004263	Atn1	12.5082	12.326	7.25678	7.82744	9.31714	4.7674	8.4496	8.46404	10.7572	7.57223	8.94369	4.93274	7.15047	6.19665	5.61667
ENSMUSG00000004264	Phb2	9.55478	7.05805	16.4805	13.5952	16.9843	9.88138	24.3749	70.2724	15.901	16.0089	9.11415	10.9951	6.52653	9.24138	8.08609
ENSMUSG00000004266	Ptpn6	50.5698	25.7769	18.8692	26.2996	29.4978	32.4772	39.6341	26.1581	53.8912	25.3455	34.1418	33.0109	24.4169	24.9745	26.6293
ENSMUSG00000004267	Eno2	0.0926553	0	0.141953	0.419255	0.866802	1.88098	0.352458	0.756142	0.0578341	0.353646	0.020881	0.120944	0.872111	0.299582	0.679832
ENSMUSG00000004268	Emg1	38.9206	3.25863	0	0	21.1175	19.4836	57.8951	19.1545	46.9949	13.7333	23.7627	4.87538	17.8935	0	15.271
ENSMUSG00000004270	Lpcat3	23.2699	27.5119	72.8616	53.3169	18.3398	15.6864	10.2179	11.8108	15.5961	14.9898	53.1348	16.5822	37.0382	29.0563	13.8704
ENSMUSG00000004285	Atp6v1f	12.636	5.45989	11.3812	8.12473	10.4028	8.4523	9.17822	8.08314	6.4909	8.79061	9.50297	4.14444	8.98196	8.84069	9.47929
ENSMUSG00000004296	Il12b	0	0	0	0	0.076176	0.0518359	0.00676666	0.238807	0	0	0	0	0	0	0.0544963
ENSMUSG00000004317	Clcn5	0.832387	3.06568	2.24887	2.40327	2.29789	1.68597	4.50931	2.18363	2.91766	2.56977	3.30904	2.46927	2.18206	2.08723	2.09411
ENSMUSG00000004319	Clcn3	6.84004	7.97425	8.41255	4.10584	5.72164	8.7358	6.89645	6.42404	5.38982	5.54565	4.33944	5.56505	5.56525	6.44354	6.10971
ENSMUSG00000004328	Hif3a	0.779168	0.127493	0.178533	0.0694241	0.249919	0.132393	0.00199522	0.00721109	0.0496915	0.0645368	1.95205	0.125066	0.101595	0.134244	0.0370369
ENSMUSG00000004341	Gpx6	0	0	0	0	0	0	0	0	0	0	0	0	0	0	0
ENSMUSG00000004344	Gpx5	0	0	0	0	0	0	0	0	0	0	0	0	0	0	0
ENSMUSG00000004347	Pde1c	0	0.21788	0	0.0711978	0.00157523	0.203815	0.046174	0	0	0.0634333	0.0378559	0.0124114	0.00232702	0.0439975	0.00374396
ENSMUSG00000004356	Utp20	4.09649	2.87407	2.74923	1.82363	3.08725	4.38018	7.7977	6.00692	4.35381	2.07275	9.21371	1.52391	2.16889	1.08461	1.94997
ENSMUSG00000004359	Spic	0	0	0	0	0	0	0	0	0	0	0	0	0	0	0
ENSMUSG00000004360	9330159F19Rik	0.00815477	0.0277901	0.00479381	0	0.00468193	0.00199584	0	0	0.00486599	0.00220642	0.00185107	0.00577314	0	0.00385071	0.0530798
ENSMUSG00000004364	Cul3	25.4102	7.3761	23.9535	12.2117	12.0251	9.3349	7.68337	11.2193	11.7548	8.17138	6.13885	10.4101	8.60772	7.31303	6.73707
ENSMUSG00000004366	Sst	0	0	0	0	0	0	0	0	0	0	0	0	0	0	0
ENSMUSG00000004371	Il11	0	0	0	0	0.455334	0	0	0	0	0	0	0	0	0	0
ENSMUSG00000004383	Large1	13.78	9.46298	10.9368	11.9835	4.67062	8.07971	12.2414	3.67154	13.9793	11.8639	11.7978	11.0738	9.49991	8.6162	9.5906
ENSMUSG00000004393	Ddx56	1.70092	5.05968	3.61798	0.975387	3.72651	6.29667	4.06624	3.86533	2.03652	4.84042	3.17196	4.50229	2.4378	3.15182	1.42565
ENSMUSG00000004394	Tmed4	8.67817	17.7687	14.7852	8.83776	12.4058	7.2138	9.9426	10.8483	9.68018	10.6716	8.54602	9.19334	9.07309	8.4174	7.94617
ENSMUSG00000004415	Col26a1	0	0	0	0	0	0	0	0	0	0	0	0	0	0	0
ENSMUSG00000004446	Bid	3.56538	2.04168	6.00726	5.02744	4.35709	2.33196	5.56477	5.35553	7.36566	5.9128	3.29425	6.13271	4.95258	5.1946	6.68738
ENSMUSG00000004451	Ralb	21.9692	18.0175	18.3903	17.9267	21.5993	18.6643	20.4874	17.6676	22.2691	20.5715	30.0991	21.1302	24.553	19.4782	15.9123
ENSMUSG00000004455	Ppp1cc	1.13718	2.12077	3.62068	6.50075	5.47128	9.32589	9.9443	8.8981	3.67197	7.34123	5.19936	6.75612	11.1299	6.90789	5.41096
ENSMUSG00000004460	Dnajb11	67.5404	40.5827	38.4166	39.1527	76.6594	71.4246	61.9859	94.3849	42.7658	43.6006	41.2315	28.5365	39.2441	35.7386	47.3586
ENSMUSG00000004462	Tbccd1	2.34287	0.816582	1.67447	1.92536	3.02402	1.07516	2.15106	2.67691	2.18649	2.61902	1.57839	1.8431	2.1402	1.66279	1.74465
ENSMUSG00000004473	Clec11a	0	0.00624743	0.52695	0.0773228	0.069323	0.0271064	0.158041	0.0162686	1.11185	0.0132687	0	0.103717	0.061552	0.210013	0.506789
ENSMUSG00000004500	Zfp324	1.36836	2.04638	1.41044	1.01398	2.33672	1.92014	2.60028	1.40511	4.55107	1.26132	2.15134	3.01438	2.28604	1.67008	1.98146
ENSMUSG00000004508	Gab2	7.98718	12.7365	9.5122	7.2116	9.77239	12.06	6.2254	9.36934	12.0511	9.85449	12.2747	11.8995	12.3663	9.28158	11.9162
ENSMUSG00000004530	Coro1c	4.55894	17.0974	8.44304	17.1444	16.299	20.4041	26.4359	15.3068	17.1606	17.7136	20.1154	18.4435	14.7164	18.6609	17.8591
ENSMUSG00000004535	Tax1bp1	12.7048	12.4062	10.6821	11.604	11.6249	13.8113	10.9095	14.7177	13.4606	13.4705	11.0508	12.0882	12.0773	12.8098	11.6393
ENSMUSG00000004540	Psg17	0	0	0	0.00590165	0	0	0	0	0	0	0	0	0	0	0
ENSMUSG00000004542	Psg19	0	0	0	0	0.0424958	0	0	0	0	0	0	0	0	0	0
ENSMUSG00000004552	Ctse	0.0198635	0.699325	2.2107	0.921953	3.62194	2.19963	0.253416	2.08186	0.553896	0.624474	0.783676	1.00931	0.732722	1.55477	2.76407
ENSMUSG00000004558	Ndrg2	0.9582	2.56518	1.32973	0.679029	1.15928	1.46583	2.63684	0.754035	1.70323	0.748436	1.60483	1.907	3.29383	0.732679	1.07194
ENSMUSG00000004561	Mettl17	3.19894	11.3298	2.69807	9.08618	3.03767	2.79042	1.19352	3.39686	8.39224	3.75451	18.129	5.00368	9.4774	3.28044	2.46406
ENSMUSG00000004562	Arhgef40	27.5637	63.8767	22.0711	15.1018	18.9948	38.5934	14.8613	16.654	15.4361	29.4483	52.3078	15.3195	15.4582	9.03365	41.0601
ENSMUSG00000004565	Pnpla6	3.19929	2.37552	2.41709	1.83546	2.73358	3.90305	0.71502	1.6769	4.62904	2.80622	2.96105	1.94765	3.57624	3.41472	3.18607
ENSMUSG00000004567	Mcoln1	30.6857	12.5599	13.9353	20.8262	18.2286	17.4257	27.9618	14.2117	22.1565	35.2487	22.2012	12.7541	35.2669	15.975	17.2911
ENSMUSG00000004568	Arhgef18	2.2551	3.92327	2.2103	7.41634	1.61015	2.9814	2.32968	2.88849	2.09135	3.3603	7.01999	4.45563	3.32629	4.2655	4.51523
ENSMUSG00000004591	Pkn2	12.0791	9.68318	8.55361	7.57206	4.08128	6.0075	3.4879	7.11413	6.70284	8.69301	4.488	3.72093	3.10094	3.70154	4.30459
ENSMUSG00000004609	Cd33	49.3026	40.6273	68.2483	107.682	103.335	115.306	101.796	69.0557	104.166	108.636	160.008	123.797	108.487	124.57	139.932
ENSMUSG00000004610	Etfb	9.19035	3.66621	6.23071	8.26469	8.10561	14.222	4.7348	11.502	5.02655	12.8649	2.17479	6.64322	5.70024	5.27166	12.4673
ENSMUSG00000004612	Nkg7	0	0	0	0	0	0	0	0	0	0	0	0	0	0	0
ENSMUSG00000004626	Stxbp2	31.7953	15.8768	17.6633	23.1965	21.8683	19.7731	20.7971	6.30067	17.5745	8.62438	16.6182	15.5905	19.5378	20.7876	11.6929
ENSMUSG00000004630	Pcp2	0	0	0.228422	0.494483	0	0	0	0	0	0	0	0.238974	0	1.10709	0
ENSMUSG00000004631	Sgce	17.5158	21.4204	17.6147	22.4909	13.9137	9.91227	21.6872	12.1092	16.9633	15.596	15.3433	23.44	13.7748	19.3987	14.7402
ENSMUSG00000004633	Chn2	56.0144	16.8447	20.584	23.8345	7.43455	12.575	5.10676	14.9681	16.3637	33.2125	15.5807	21.359	16.0313	16.7071	19.898
ENSMUSG00000004637	Wwox	3.35133	4.87654	1.42674	2.46254	2.68481	2.07161	6.60007	1.79781	5.7613	4.18454	2.97379	2.67752	8.63223	4.47702	3.97366
ENSMUSG00000004642	Slbp	7.65181	10.2358	6.61277	9.00601	13.4978	10.065	7.19548	29.1391	12.1314	8.61212	16.1602	10.2864	11.2531	11.2443	5.33948
ENSMUSG00000004651	Tyr	0	0	0.00335514	0	0	0	0	0	0	0	0	0	0	0.0018603	0
ENSMUSG00000004654	Ghrhr	0	0	0	0	0	0	0	0	0	0	0	0	0	0	0
ENSMUSG00000004655	Aqp1	0	0	0	0	0	0	0	0	0	0	0	0	0	0	0
ENSMUSG00000004661	Arid3b	24.9336	11.4273	14.3683	18.579	9.06742	10.6314	9.60237	7.03769	17.6728	22.8258	19.4135	18.5305	18.3063	16.2921	11.7401
ENSMUSG00000004665	Cnn2	0.072187	0.371784	1.9889	2.04883	1.73506	2.03158	0.941782	0.938815	0.706387	2.02415	1.44274	1.03597	0.676161	1.7357	1.69806
ENSMUSG00000004667	Polr2e	7.06286	2.44143	8.3158	14.0818	14.9947	8.33886	15.6359	12.7242	9.40883	16.7599	10.352	10.6121	11.9308	12.1211	9.22684
ENSMUSG00000004668	Abca13	0.0430087	0.015739	0.00958597	0.00146848	0.0225029	0.000735819	0.0121689	0.061041	0.0383894	0.205791	0.00617601	0.146792	0.0494071	0.0380926	0.0208745
ENSMUSG00000004677	Myo9b	9.2469	5.50859	7.24836	6.99801	9.17674	9.78522	6.79921	8.17038	6.61659	8.11248	8.81463	7.76173	9.89547	9.83762	10.3268
ENSMUSG00000004698	Hdac9	3.80734	3.68272	4.26386	3.87148	7.59526	12.218	3.19076	5.98252	7.93236	7.69644	5.1534	5.15052	7.42324	8.05606	6.62815
ENSMUSG00000004707	Ly9	9.23712	2.39288	6.72034	3.60995	7.26385	7.17081	6.08908	4.31073	1.89893	2.35673	4.36126	1.41904	6.81044	3.43078	4.55423
ENSMUSG00000004709	Cd244	0.308029	0.181434	0.0723157	0.406733	18.6027	7.21903	15.1462	12.3074	0.479902	0.456464	0.029025	0.381164	0.76855	1.88707	4.30105
ENSMUSG00000004730	Adgre1	15.4864	16.614	22.3594	21.4938	31.6282	39.088	24.5252	23.7411	22.4335	16.4894	15.6658	19.5305	20.8162	24.9988	23.1466
ENSMUSG00000004748	Mtfp1	0.0116511	0.576946	0.456381	0.182831	1.12124	1.28907	0.919851	0.089884	0.90513	1.87827	0.964378	0.199846	0.36408	0.822418	0.671797
ENSMUSG00000004768	Rab23	2.05174	0.515891	1.00026	0.425649	1.39686	2.4368	0.611855	2.90753	1.5486	1.41753	0.211319	1.09922	1.14224	1.15087	0.691018
ENSMUSG00000004771	Rab11a	23.1058	18.4636	27.2714	16.0285	26.5648	22.2175	18.8504	19.4954	16.0602	17.3589	18.7664	19.1481	18.0411	19.2107	27.807
ENSMUSG00000004788	Eif2b2	3.06176	1.36163	4.55989	4.00543	9.05821	6.71679	11.0106	4.09073	1.74168	3.38331	5.21262	4.84128	6.58196	7.10517	5.56114
ENSMUSG00000004789	Dlst	15.3717	18.3814	23.247	18.2969	20.7364	22.9957	37.9459	20.4244	15.6104	30.5857	15.1831	22.6662	24.1046	16.9499	25.3205
ENSMUSG00000004791	Pgf	0	0	0	0	0.029312	0	0	0	0.0257928	0	0	0	0	0	0
ENSMUSG00000004798	Ulk2	33.3398	33.6324	14.538	29.1137	29.5043	24.4436	35.3049	26.5027	30.6733	30.8541	38.6036	27.8069	30.1431	30.2769	33.0978
ENSMUSG00000004814	Ccl24	0	1.06622	0.306416	0.538281	0.45319	0.102238	2.52152	0	1.46883	1.91975	0.515425	0.374643	0.12016	0.901172	0.60478
ENSMUSG00000004815	Dgkq	4.55756	6.71806	0	0	3.34981	5.12907	1.56403	0	0	0	0	0	0	0	0
ENSMUSG00000004821	Tmed11	0	0	0	0	0	0	0	0	0	0	0	0	0	0	0
ENSMUSG00000004837	Grap	11.314	3.59932	7.66497	4.99737	8.22323	3.87964	5.51955	3.98767	7.58013	10.3813	6.61242	7.38374	5.83785	4.8576	3.42751
ENSMUSG00000004842	Pou1f1	0	0	0	0	0.275188	0	0	0	0.00888393	0	0	0.0157398	0	0.0233778	0.0147787
ENSMUSG00000004843	Chmp2b	4.25017	5.46764	3.33556	2.51187	4.04429	2.25977	1.18894	2.99875	2.88251	2.1619	3.21698	2.18913	2.60928	2.38085	2.95571
ENSMUSG00000004846	Plod3	13.1177	25.3639	12.8018	16.0172	36.3316	20.5278	35.9712	17.901	25.2396	19.9873	37.0379	18.1183	39.7963	18.8014	26.3236
ENSMUSG00000004849	Ap1s1	1.71102	3.44707	3.72419	7.13128	7.21365	5.01384	2.02761	4.17813	1.62176	5.00422	2.32239	4.23637	3.7292	2.94069	4.27782
ENSMUSG00000004864	Mapk13	0	0	0	0	0	0	0	0	0	0	0	0	0.060689	0	0
ENSMUSG00000004865	Srpk1	3.52541	42.4559	6.46006	13.4154	8.3677	6.18232	18.7486	5.28618	5.32939	6.90494	5.77318	7.31442	11.5106	5.62809	5.85183
ENSMUSG00000004872	Pax3	0	0	0	0	0	0	0	0	0	0.00410078	0	0	0	0	0
ENSMUSG00000004880	Lbr	1.73328	3.19926	10.6184	7.30268	3.41117	5.86628	6.75295	6.5545	13.1112	9.3069	9.61718	4.10889	3.92189	5.76348	4.71525
ENSMUSG00000004885	Crabp2	0	0	0	0	0	0	0	0	0	0	0	0	0	0	0
ENSMUSG00000004891	Nes	0.0169134	0.252293	0.336643	0.308641	3.17601	1.83737	1.32483	2.30749	0.358477	0.945317	0.089169	0.226978	0.91376	0.847774	0.816815
ENSMUSG00000004892	Bcan	0	0	0	0.683231	0.0108145	0	0	0.0340069	0.0680632	0.513079	0.110334	0	0.069803	0	0.0510785
ENSMUSG00000004894	Hapln2	0	0	0	0	0	0.012256	0	0.0170528	0	0	0	0	0	0	0.00574881
ENSMUSG00000004895	Prcc	8.17015	9.26592	5.24497	6.28923	3.95523	5.38729	3.6607	5.29107	4.51705	6.33623	6.16777	6.32084	6.0261	4.3168	3.425
ENSMUSG00000004896	Rrnad1	5.75966	10.1461	3.07525	3.85707	2.8306	6.22349	4.60753	3.15718	5.12465	4.98387	6.20083	5.85652	5.81681	2.62164	3.57283
ENSMUSG00000004897	Hdgf	4.0874	9.90347	4.77835	3.62312	8.08824	7.23961	6.96338	9.45294	2.88272	2.74738	5.62168	5.89137	4.88824	4.73362	4.88666
ENSMUSG00000004902	Slc25a18	0	0	1.83297	0	0	0	0	0	0	1.36015	0	0	0	1.62295	1.36153
ENSMUSG00000004929	Thop1	0.250161	0	0.34078	0.633711	2.28729	1.99071	3.70529	1.99758	1.26217	0.25338	0.798757	1.35615	0.978387	1.0355	0.544901
ENSMUSG00000004931	Apba3	6.8959	7.57835	2.77858	4.07219	6.73069	2.92012	2.56386	2.72279	7.16412	4.67253	5.49934	5.17344	3.11925	4.06393	5.20641
ENSMUSG00000004933	Matk	2.92639	3.35241	1.27239	2.6464	0.88845	1.41759	0.356002	3.96071	3.69227	2.79592	2.51576	6.94115	2.23201	3.19738	4.04284
ENSMUSG00000004934	Pias4	1.37141	3.64717	1.63897	5.07628	4.38161	3.5964	3.10953	2.3741	6.12746	2.47434	5.717	3.58452	5.28901	3.10598	4.77139
ENSMUSG00000004936	Map2k1	13.1333	10.643	11.0126	8.97522	11.2763	12.5179	6.6614	6.8707	11.5847	11.7543	12.8476	11.896	10.2034	9.07649	7.55052
ENSMUSG00000004937	Sgta	7.32622	12.967	6.86492	5.84805	10.0836	9.57895	10.3566	6.3237	4.33584	5.56159	4.75534	8.57307	5.38758	10.6044	5.34049
ENSMUSG00000004939	Nmrk2	0	0	0	0	0	0	0.00700342	0	0	0	0	0	0	0	0
ENSMUSG00000004945	Tmem242	1.48641	3.84021	3.52938	2.13604	5.79447	6.17715	4.04076	6.17985	6.48944	2.69659	2.50347	2.30087	3.78415	3.44817	4.2281
ENSMUSG00000004947	Dtx2	1.40599	1.5781	6.41053	4.49172	3.17414	3.3069	1.69249	4.30058	16.0568	4.26846	5.88669	4.22249	6.39908	4.6145	2.35752
ENSMUSG00000004948	Zp3	0	0	0	0	0	0	0	0	0	0	0	0	0	0	0
ENSMUSG00000004951	Hspb1	0	0	0	0	0	0	0	0.136845	0	0	0	0	0.0156425	0	0
ENSMUSG00000004952	Rasa4	12.9533	12.1737	5.62334	19.6713	30.3531	11.6417	6.42826	12.9375	40.7484	27.1472	16.8691	18.8084	32.9565	12.1513	21.9696
ENSMUSG00000004961	Syt5	0	0.0330333	0	0	0.0463768	0	0	0	0	0.00746216	0.0216656	0.0730114	0	0.0611443	0
ENSMUSG00000004980	Hnrnpa2b1	75.3356	97.7173	91.4083	88.1746	121.175	117.161	158.021	111.797	96.6826	104.161	79.934	90.1332	93.8199	84.1821	64.6272
ENSMUSG00000004988	Fxyd4	0.873195	0.167324	0.399866	0.209401	2.78259	1.1366	1.37744	1.67278	1.52202	1.42466	0.866891	0.755492	1.28278	0.67816	0.407952
ENSMUSG00000004994	Ccdc130	0.566823	7.43939	4.29827	5.94524	4.99568	5.49919	3.48325	2.87276	13.5392	9.58202	6.47488	5.43967	10.2176	3.9813	3.50969
ENSMUSG00000004996	Mri1	3.69364	2.67659	2.34083	3.41595	3.68813	3.09489	6.95324	2.60878	3.38413	3.57664	2.4799	1.37906	4.34011	2.81706	3.84004
ENSMUSG00000005034	Prkacb	6.00408	11.649	6.73514	7.38151	7.33272	7.00003	6.19259	5.17449	6.85753	6.14231	7.6871	7.56169	6.43774	7.10582	8.05737
ENSMUSG00000005043	Sgsh	1.76032	5.61833	2.464	1.84438	1.38549	0.507667	0.572854	0.703064	3.30157	9.67142	1.71676	5.11818	1.87902	3.32336	2.83623
ENSMUSG00000005045	Chd5	0	0	0.00151954	0	0.0608069	0.302377	0	0	0	0.181395	0.0107828	0	0.142079	0.00417873	0.00947035
ENSMUSG00000005054	Cstb	21.7296	5.09119	8.83943	8.86238	36.6105	33.4965	19.383	19.1556	7.58382	9.297	13.9922	3.75192	7.38672	10.3929	12.8066
ENSMUSG00000005057	Sh2b2	15.9507	6.43719	12.2297	10.0015	15.2993	15.0619	15.0518	12.372	13.3258	13.0577	15.5391	14.7619	14.651	13.4225	13.153
ENSMUSG00000005069	Pex5	0.340531	1.15571	1.66492	1.88156	1.40012	1.54688	2.00341	1.296	1.33158	6.37642	2.58752	0.890163	2.76187	1.00275	1.30766
ENSMUSG00000005078	Jkamp	1.52595	8.04059	4.67801	3.33351	6.10063	2.98237	3.62829	5.40038	4.1466	6.15262	1.88929	2.46322	4.2577	5.08943	4.04252
ENSMUSG00000005087	Cd44	0.0218976	0.111547	0.385285	0.570101	3.81826	5.76977	0.622307	3.28087	0.225016	0.106893	0.177266	0.705507	0.990419	1.61653	1.56088
ENSMUSG00000005089	Slc1a2	0.0967714	0.0190605	4.52119	0.144245	0.280404	0.241497	0.398357	0.277544	0.219713	0.411431	1.17597	0.282029	0.430537	0.197186	0.133818
ENSMUSG00000005102	Eif2ak4	5.69131	3.16635	3.61561	3.57741	3.20978	4.76388	7.69524	3.69381	3.9591	4.54608	4.31928	2.76097	2.99796	3.6431	4.85171
ENSMUSG00000005103	Wdr1	8.76936	23.5742	16.0514	11.7332	23.1664	28.8755	26.0486	20.1672	14.8146	12.1583	12.3776	15.2302	14.9401	15.0436	15.6622
ENSMUSG00000005107	Slc2a9	1.37037	3.28984	2.6705	0.696517	3.64003	1.9832	2.37334	3.67396	3.41608	1.06829	0.600236	1.87547	3.3992	2.54935	2.3465
ENSMUSG00000005124	Wisp1	0	0	0.0301697	0	0.00282547	0	0	0	0	0	0	0	0	0.352861	0
ENSMUSG00000005125	Ndrg1	0	0	0	0.0134066	0.0922314	0	0.150365	0	0	0.0603592	0	0	0	0	0.0270515
ENSMUSG00000005131	4930550C14Rik	0.611318	0.0361769	0.0634394	0.187849	0.169009	0.435875	0.00911502	0.388244	0.546088	0.568902	0.111102	0.318113	0.498658	0.182364	0.0572451
ENSMUSG00000005142	Man2b1	108.722	249.024	254.695	107.137	160.086	154.204	144.507	113.499	118.078	105.489	160.058	107.854	208.061	152.46	161.073
ENSMUSG00000005148	Klf5	0.00433561	0	0	0	0.0179631	0	0	0.0563775	0	0	0	0	0	0	0.0274967
ENSMUSG00000005150	Wdr83	1.93113	11.5855	0	2.15798	0	1.80536	0	8.55265	5.17244	1.50486	0	2.56724	0	0	0
ENSMUSG00000005161	Prdx2	6.76268	4.71274	2.13862	4.11665	13.7258	11.4964	10.4232	9.15091	4.16615	10.7296	3.88427	8.26966	9.23056	8.5546	10.8768
ENSMUSG00000005198	Polr2a	4.65818	5.86019	7.72357	5.56034	8.42618	7.98255	7.72726	10.4889	9.09846	5.42481	7.43248	6.27988	7.46603	7.91237	6.63715
ENSMUSG00000005202	Shbg	0	0	0	0	0	0	0	0	0	0	0	0	0	0	0
ENSMUSG00000005204	Senp3	8.95767	10.1406	28.449	10.6105	16.261	16.8272	10.817	8.20835	14.3221	17.9682	18.4216	13.0154	10.7355	16.1825	14.0856
ENSMUSG00000005220	Corin	0.00878971	0	0.0424256	0.0217027	0.07629	0.018308	0.0241132	0.0692562	0.0166316	0.0160572	0.0171779	0.0507002	0.0144505	0.0250643	0.0402448
ENSMUSG00000005225	Plekha8	0.963382	1.70272	2.27282	3.03127	1.73398	0.644985	1.1967	1.6944	0.713291	1.38089	0.595502	0.799843	1.35678	0.847272	1.32019
ENSMUSG00000005232	G6pc2	0	0	0	0	0	0	0	0	0	0	0	0	0	0	0
ENSMUSG00000005233	Spc25	0.0250191	0.364611	0.118261	0.524881	1.64955	6.0233	0.199857	6.04582	0.0937372	0.373356	0	0.44962	0.184622	1.74595	0.243951
ENSMUSG00000005237	Dnah2	0.0327505	0.00935898	0	0.0803988	0.178811	0.0603439	0.00935818	0.090097	0.242121	0.313504	0.157268	0.359463	0.210528	0.544088	0.265741
ENSMUSG00000005251	Ripk4	0	0	0	0	0	0	0	0	0	0	0	0	0	0	0
ENSMUSG00000005262	Ufd1	9.51871	9.43172	9.92775	7.19369	7.47797	10.0059	12.1428	4.17523	12.2804	12.3404	23.7103	10.4526	13.6528	13.9671	10.1048
ENSMUSG00000005267	Zfp287	0.477584	0.210279	0.727971	2.23585	0.987927	0.774241	3.27668	0.822141	1.11083	2.13077	1.13406	1.86364	1.12019	1.25977	0.701027
ENSMUSG00000005268	Prlr	0	0.00329983	0.00273974	0	0	0	0	0	0	0.0456318	0	0.00946291	0.00106362	0	0.00157226
ENSMUSG00000005299	Letm1	1.5199	3.87898	3.23686	4.00502	2.94104	3.65686	1.96858	2.63658	6.06489	3.9262	1.50596	3.73703	4.72977	2.62282	3.24238
ENSMUSG00000005312	Ubqln1	7.97127	17.0376	9.47053	10.9086	8.63584	7.97561	9.82921	10.1471	12.3659	9.00695	7.17935	8.37857	8.98594	8.25598	7.10482
ENSMUSG00000005320	Fgfr4	0	0	0	0	0	0	0	0	0	0	0	0	0	0	0
ENSMUSG00000005338	Cadm3	0.00864829	0	0	0	0.13128	0	0.010474	0.0962122	0	0	0	0	0.0423639	0	0.0197689
ENSMUSG00000005339	Fcer1a	0	0	0	0	0	0	0	0	0	0	0	0	0	0	0
ENSMUSG00000005354	Txn2	3.15009	5.1685	4.72698	5.41791	8.6531	9.30393	11.6126	4.20086	11.7053	5.76751	3.63084	5.34046	8.78658	5.15945	5.93686
ENSMUSG00000005355	Casp14	0	0	0	0	0	0	0	0	0	0	0	0	0	0	0
ENSMUSG00000005357	Slc1a6	0	0	0	0	0	0	0	0	0	0	0	0	0	0	0
ENSMUSG00000005360	Slc1a3	11.8397	13.4624	8.20908	16.2545	4.74569	3.28124	13.0779	8.53987	5.54778	9.05245	10.8434	9.09254	6.8309	5.58824	9.43361
ENSMUSG00000005362	Crbn	8.05841	14.2945	7.938	5.90533	4.7702	7.00011	2.84581	6.33935	7.87681	5.57707	3.65308	8.00349	7.37005	6.66762	8.7206
ENSMUSG00000005364	Il5ra	0	0	0.039702	0	0.0224073	0	0	0	0	0	0	0	0	0	0
ENSMUSG00000005370	Msh6	2.77564	2.38208	2.41773	3.26846	4.35967	3.61407	3.48126	3.74042	3.08849	3.40502	1.82942	1.98783	2.30189	2.61254	3.06132
ENSMUSG00000005371	Fbxo11	6.2107	6.63181	10.6697	5.70354	4.78255	4.97771	11.0962	5.37647	7.22192	7.53633	10.8588	6.57792	8.45119	6.853	4.81238
ENSMUSG00000005373	Mlxipl	41.5381	46.8042	40.0569	33.3654	47.8109	33.775	43.1532	28.7991	41.506	40.0891	54.0192	43.0618	41.7639	35.4807	41.6472
ENSMUSG00000005374	Tbl2	2.49809	1.02215	2.09374	1.70651	3.82195	4.23281	7.21897	3.36844	2.56574	2.04787	2.32152	1.78136	2.51192	2.45026	2.16295
ENSMUSG00000005378	Bud23	5.39508	7.32238	4.80178	7.08806	9.50079	8.89304	6.09274	5.732	4.18416	5.97671	4.68394	5.06132	5.13896	3.9292	5.0304
ENSMUSG00000005397	Nid1	0	0	0.0108164	0	0.019939	0.00205669	0	0	0	0	0.1877	0	0.00309321	0.00795273	0
ENSMUSG00000005410	Mcm5	0.331142	0	0.15541	0.62313	2.20389	4.78437	1.17533	3.48969	0.194022	0.386492	0.417435	1.62327	0.69805	1.69111	0.246854
ENSMUSG00000005413	Hmox1	8.02544	2.32705	5.8402	7.43512	16.6155	35.4853	14.5132	8.18249	4.64053	6.43966	6.38023	4.98472	4.72403	4.60145	3.30805
ENSMUSG00000005417	Mprip	6.03853	8.0956	6.87916	8.92298	3.25195	2.61497	2.43113	3.04393	7.58982	1.90584	2.83961	2.96	8.02493	5.36378	5.29577
ENSMUSG00000005442	Cic	18.7185	51.4711	21.906	18.7101	21.0658	21.4858	31.458	19.5675	21.0252	19.0089	28.799	21.8438	22.7116	18.8664	20.5833
ENSMUSG00000005447	Pafah1b3	1.57777	0.0306237	6.85915	5.95386	4.64973	6.02728	9.43267	1.22504	0.461667	2.47283	1.60297	1.32772	4.58508	3.98703	3.52305
ENSMUSG00000005465	Il27ra	0	0.0607015	0	0.328534	0.399563	0.218421	0.342255	0.0531544	0	0	0.0450774	0.0717598	0.00815788	0.0334262	0.0162929
ENSMUSG00000005469	Prkaca	9.81293	7.81165	7.87235	5.94118	6.07223	4.7103	5.56416	4.26863	3.47056	4.18997	6.31295	4.66366	4.05019	4.19022	3.50979
ENSMUSG00000005470	Asf1b	0.00854173	1.01497	0	0.254784	2.24435	6.71559	0.244977	7.06281	1.06428	0.957992	0.00674047	0.0318907	0.85906	1.1833	0.674336
ENSMUSG00000005474	Myl10	0	0	0	0	0	0	0	0	0	0	0	0	0	0	0
ENSMUSG00000005481	Ddx39	3.37906	6.55417	3.04621	2.39414	6.91763	7.09608	4.26498	6.55043	4.00525	2.24335	1.17493	3.69014	2.88655	3.38268	4.0898
ENSMUSG00000005483	Dnajb1	8.02181	9.85199	10.6364	7.00159	7.27244	7.42715	5.74912	8.16484	8.06027	7.7521	5.08343	5.76016	4.60307	4.61281	3.22584
ENSMUSG00000005493	Msh4	0.0855438	0	0.259272	0.161508	0.292654	0.124068	0.0426579	0.012989	0.132707	0.057962	0	0.151853	0.211558	0.0677663	0.0103173
ENSMUSG00000005501	Usp40	4.99588	6.59394	7.50244	9.56996	4.94071	8.98917	3.94439	6.73225	7.38599	6.23202	5.08482	7.56204	5.30064	6.28485	5.84605
ENSMUSG00000005503	Evx1	0	0	0	0	0	0	0	0	0	0	0	0	0	0	0
ENSMUSG00000005505	Kbtbd4	3.29242	0	4.08432	5.14111	4.26912	18.0799	3.08926	2.69624	2.2694	2.09372	4.5438	2.90298	2.71549	2.96069	2.92705
ENSMUSG00000005506	Celf1	8.90083	12.1233	13.3187	7.58132	9.17645	7.92521	11.9284	8.18325	10.9201	9.44823	11.5362	8.92124	9.9721	7.66228	8.08936
ENSMUSG00000005510	Ndufs3	0	0	0	3.63414	0	0	3.69983	0	3.55822	9.09929	4.39172	0	0	0	0
ENSMUSG00000005514	Por	16.0288	6.6607	11.6291	7.16299	11.0515	13.4756	21.5791	4.91195	13.9551	6.78395	7.48368	9.68527	6.15893	5.09669	6.9043
ENSMUSG00000005533	Igf1r	3.73446	9.0006	4.9867	3.40892	1.88112	5.35114	3.19553	1.57357	5.56355	7.08752	3.70236	4.53316	2.98662	2.62801	3.25311
ENSMUSG00000005534	Insr	9.90353	19.6746	9.05621	11.9958	5.53318	11.913	6.55835	4.97182	11.5727	12.0335	15.5385	19.8663	16.7643	8.39069	8.57274
ENSMUSG00000005540	Fcer2a	0.0438247	0.117041	0.11453	0.314667	0.690729	0	0.682567	0.127668	0.0178664	0.146365	0	0.387476	0.0999273	0.457488	0.370891
ENSMUSG00000005547	Cyp2a5	0	0	0	0	0	0	0	0	0	0	0	0	0	0	0
ENSMUSG00000005553	Atp4a	0	0	0.159049	0	0	0.139856	0	0	0.0641994	0.390639	0	0.00520301	0	0.0949877	0.00929484
ENSMUSG00000005566	Trim28	19.895	45.5093	51.0051	34.2067	60.0062	35.1677	56.1027	42.2393	44.3065	31.403	37.0689	32.5611	37.63	36.0572	31.9437
ENSMUSG00000005575	Ube2m	7.9749	16.7534	6.57876	9.48925	10.006	9.65621	9.08804	12.6902	12.7816	12.9201	9.12856	8.35535	10.5629	8.4351	9.67796
ENSMUSG00000005580	Adcy9	1.20882	0.967759	2.92266	2.29799	1.43002	1.58121	0.869273	0.728335	1.69378	1.64389	2.0717	1.83867	2.49883	1.95129	1.62542
ENSMUSG00000005583	Mef2c	46.0943	61.1924	49.9975	53.3314	49.3771	49.0479	47.5373	42.1744	55.6395	59.462	43.7293	62.7959	47.7962	51.5176	44.4016
ENSMUSG00000005609	Ctr9	11.3326	2.84399	2.1909	2.57971	3.62499	7.28553	3.6472	3.02159	1.31846	1.95221	10.8552	2.90489	3.43615	2.78121	4.89991
ENSMUSG00000005610	Eif4g2	36.5031	37.8229	41.7018	38.1867	61.1194	68.1692	63.443	63.4615	45.7933	41.3324	47.5008	39.5144	41.1837	41.6504	40.0798
ENSMUSG00000005611	Mrvi1	0.037149	0	0	0	0	0	0	0.0333169	0.00591356	0.113273	0	0.00316715	0	0	0.00982023
ENSMUSG00000005615	Pcyt1a	2.25671	1.91634	1.73903	1.49431	3.70172	2.09914	4.35497	2.92989	2.35815	3.28142	3.04203	2.06355	2.46402	3.00227	2.24738
ENSMUSG00000005621	Zfp592	7.46045	7.17008	6.0566	6.35338	7.06224	4.84123	6.62678	7.49047	7.01405	6.03037	6.48155	8.24688	8.31958	6.56122	5.77841
ENSMUSG00000005625	Psmd4	6.82878	4.82978	6.9731	9.11627	7.73937	8.15913	6.13943	5.75134	7.19194	14.1671	4.99514	7.957	4.55812	5.81728	4.89999
ENSMUSG00000005628	Tmod4	0.142455	1.47909	1.22569	0.583321	0.117643	0.0799579	0.702824	0.686517	0	0.0794857	0.235236	0.890263	1.55274	0.0579991	0.167516
ENSMUSG00000005640	Insrr	0	0	0	0	0	0	0	0	0	0	0	0	0	0	0
ENSMUSG00000005649	Cabp5	0	0	0	0	0	0	0	0	0	0	0	0	0	0	0
ENSMUSG00000005656	Snx6	19.7671	17.0661	12.2105	9.24736	13.1545	10.7457	17.6953	11.0123	12.6441	11.2103	15.0421	8.46015	10.0877	10.0515	9.29956
ENSMUSG00000005667	Mthfd2	0.701793	0.484529	0.628291	1.29425	3.6507	1.84113	4.6283	5.00844	4.49901	3.09395	1.34087	3.56752	6.11414	3.64083	2.52306
ENSMUSG00000005672	Kit	0	0	0.00496266	0	0	0	0	0	0	0	0	0	0	0	0
ENSMUSG00000005674	Tomm40l	1.66501	0.633935	0.503629	1.41672	3.30646	0.772131	2.07761	1.70548	1.09671	2.97037	1.9638	2.09427	1.68765	1.79086	1.47306
ENSMUSG00000005677	Nr1i3	0.168954	0	0.811714	0	0	0	0	0	0.108241	0	0	0	0.151175	0	0.182892
ENSMUSG00000005681	Apoa2	0.209656	0.0451042	0.346248	0.359077	0.56975	0.263121	0.541404	0.964934	0.0777936	0.151406	1.35593	0.373701	0.572577	0.606443	0.209067
ENSMUSG00000005682	Pan2	4.02429	3.09557	3.33427	3.43045	4.046	2.94027	5.46442	2.8401	4.19835	2.95737	5.13134	2.94928	4.25647	4.86773	4.68539
ENSMUSG00000005683	Cs	5.92234	8.6514	9.20677	8.01629	14.3927	18.7343	10.0899	14.8307	10.9446	9.23366	8.37994	7.70002	9.96777	8.02041	9.18031
ENSMUSG00000005686	Ampd3	3.24913	2.49464	2.43267	4.55855	2.7401	1.37697	2.77769	0	0	2.65935	0	5.12711	3.86508	2.98313	3.32942
ENSMUSG00000005687	Bcas2	2.36058	3.84846	2.91104	4.56527	4.56355	4.57934	5.52981	4.84857	4.7906	4.53129	3.48525	3.32275	4.50102	3.44195	4.28446
ENSMUSG00000005696	Sh2d1a	0	0	0	0	0	0	0	0	0	0	0	0.0630058	0	0.00505804	0
ENSMUSG00000005698	Ctcf	24.9317	4.88266	9.7061	6.86911	8.45069	6.57076	9.18434	9.15115	14.3392	12.4409	5.24183	6.36559	6.57331	7.52311	6.25221
ENSMUSG00000005699	Pard6a	0.431506	2.49874	0.477261	0.36964	0.771911	0.0249628	0.07288	4.61566	0.941391	0.0430806	2.12503	0.30966	2.61701	0.841153	0.469604
ENSMUSG00000005705	Agrp	0	0	0	0	0	0	0	0	0	0	0	0	0	0	0
ENSMUSG00000005716	Pvalb	0	0	0	0	0	0	0	0	0	0	0	0	0	0.0136167	0
ENSMUSG00000005718	Tfap4	1.07219	0.738794	1.64942	0.506008	1.01545	1.32811	0.258647	0.243451	1.22399	1.46779	0.551729	2.18713	1.54738	1.43569	0.898359
ENSMUSG00000005732	Ranbp1	0	4.53416	0	0	14.6456	11.9184	21.7986	12.8397	9.92883	0	0	0	0	0	6.39038
ENSMUSG00000005763	Cd247	0	0	0	0	3.61896	0	2.92156	0	0	0	0	0	0	0	0
ENSMUSG00000005774	Rfx5	4.18439	2.62367	3.88215	3.51038	6.60298	2.27473	4.24616	2.34011	3.70677	3.80967	3.09382	2.93878	3.50898	3.78142	2.84672
ENSMUSG00000005779	Psmb4	37.4543	24.8066	28.2193	29.1029	46.2911	40.8982	36.7393	37.5386	12.0424	27.045	24.2295	29.688	23.3555	29.3768	28.2319
ENSMUSG00000005800	Mmp8	0	0	0	0	0	0	0	0	0	0	0	0	0	0	0
ENSMUSG00000005802	Slc30a4	0.733514	1.05469	1.68439	1.2973	1.36218	1.2785	2.13705	1.62251	1.2122	1.15765	3.00176	1.14777	2.03535	1.28639	1.05434
ENSMUSG00000005803	Sqor	25.7897	31.1393	19.4978	13.379	13.8952	5.6138	5.13378	12.8704	14.521	21.6527	7.59955	15.739	12.273	16.8689	13.9384
ENSMUSG00000005804	Bloc1s6	1.00093	4.4964	2.68095	5.80974	6.64543	5.80857	1.81382	8.05178	6.59258	3.31687	5.52984	9.5183	3.93551	7.48156	6.20147
ENSMUSG00000005813	Metap1	20.2586	11.9539	16.692	8.76621	8.89849	14.6589	28.4043	14.8113	18.1382	13.1498	11.5168	14.0069	13.615	13.702	14.8598
ENSMUSG00000005823	Gpr108	10.0607	6.6255	8.73504	10.5687	11.0398	9.58098	5.3607	12.0944	9.77462	16.8027	11.1631	11.7379	9.31978	15.6993	11.8003
ENSMUSG00000005824	Tnfsf14	0	0	0	0.124148	0.0171207	0.320012	0.03647	0	0	0	0	0.02893	0	0.00706562	0.0102261
ENSMUSG00000005836	Gata6	0	0.192973	0	0	0	0	0	0	0	0	0	0	0	0	0
ENSMUSG00000005846	Rsl1d1	13.8742	11.2697	16.1286	8.64196	16.9922	16.9443	39.6598	13.4191	14.9675	14.6941	9.73781	12.5219	11.3373	12.726	8.13732
ENSMUSG00000005864	Cnga2	0.144741	0	0.0995134	0.0121739	0	0.0524589	0.0124125	0.00712722	0.0406473	0.00808263	0.0339823	0.0331045	0	0.0350441	0.00188781
ENSMUSG00000005871	Apc	11.0929	9.78133	7.994	10.4447	7.26034	6.09466	8.92165	6.35652	10.1049	8.14493	9.89828	10.4824	10.3881	5.52333	7.18334
ENSMUSG00000005873	Reep5	11.1293	18.2958	16.1633	14.7537	14.5005	16.7403	16.8074	18.5182	14.1989	14.0075	12.4975	14.2151	13.0634	13.84	12.8745
ENSMUSG00000005881	Ergic3	45.5959	59.7548	37.1151	28.9728	52.149	48.3099	72.2089	56.8555	36.7509	44.7448	40.8712	44.1267	57.2106	40.6917	46.1328
ENSMUSG00000005882	Uqcc1	5.55027	7.29475	3.01918	3.02515	3.5861	3.51471	5.93223	2.25874	7.0807	3.68407	5.86448	4.87259	3.82194	4.71813	2.74421
ENSMUSG00000005883	Spo11	0.00364107	0	0	0	0	0	0	0	0	0	0	0	0	0	0
ENSMUSG00000005886	Ncoa2	7.87409	6.35844	6.98951	7.42926	4.52431	5.64093	7.40942	6.1374	9.96294	11.0617	8.37572	8.07311	9.62957	6.84706	7.00906
ENSMUSG00000005891	Prl4a1	0	0	0	0	0	0	0	0	0	0	0	0	0	0	0
ENSMUSG00000005892	Trh	0	0	0	0	0	0	0	0	0	0	0	0	0	0	0
ENSMUSG00000005893	Nr2c2	3.80068	8.7093	9.09255	8.38446	7.02293	10.1906	3.88117	4.51119	8.95888	5.76016	5.19154	6.03833	8.3453	5.83182	5.92356
ENSMUSG00000005897	Nr2c1	2.43969	5.32302	2.7704	3.3218	2.45752	1.73979	1.81359	2.70035	1.69244	1.7758	3.46193	3.15825	1.77259	1.66438	2.12527
ENSMUSG00000005899	Smpd4	7.96541	20.5736	3.69419	2.03797	2.52103	6.46666	4.44257	3.33237	6.00038	4.4101	2.82928	5.95646	4.38285	3.19101	2.13436
ENSMUSG00000005907	Pex1	3.03638	1.10694	0	2.4126	1.72546	0	6.00228	0	0	0	15.1229	2.70378	0	0	4.52886
ENSMUSG00000005917	Otx1	0	0.0209677	0.0104714	0.00511622	0	0	0.00490879	0.00930774	0	0	0.00449864	0.0134165	0.00904653	0.00489691	0
ENSMUSG00000005936	Kctd20	7.36355	5.66928	3.228	4.75715	3.28331	6.80053	2.96326	3.91948	4.30584	4.45645	2.7101	4.18982	3.15757	3.8264	3.93049
ENSMUSG00000005947	Itgae	2.04018	0.699311	0.585558	0.998599	1.406	0.916318	1.01819	1.34848	1.42571	1.17154	0.235286	1.07195	1.88454	1.23287	1.0552
ENSMUSG00000005949	Ctns	18.5665	2.98563	4.57447	6.25245	11.7509	6.41564	7.05745	5.62375	10.282	6.14212	4.15211	8.23679	7.12458	5.99196	7.54817
ENSMUSG00000005950	P2rx5	0.143095	0.0186999	0.990305	0	0.223651	0.0502107	0.0112004	0.452487	0.0335638	0.18632	0.415154	0.0445537	0.15733	0.205443	0.181511
ENSMUSG00000005951	Shpk	0.128799	0.312605	0.0601772	0.268937	0.212367	0.149403	0.108349	0.0999963	0.148384	0.214187	0.199577	0.174074	0.586203	0.437614	0.319193
ENSMUSG00000005952	Trpv1	0	0	0	0	0	0	0	0	0.0291446	0	0	0	0	0	0
ENSMUSG00000005958	Ephb3	0.312801	0.815902	0.348436	0.0919321	0.438329	0.216272	0.42094	0.320151	0.227518	0.207831	0.815289	0.786226	0.191848	0.368507	0.309188
ENSMUSG00000005968	Tuft1	0	0	0.803317	0.900677	0.874001	0.11912	0.394907	0.0274687	0.0128259	1.75589	0.00573562	0.0797342	0.0655762	0.0346705	0.221697
ENSMUSG00000005973	Rcn1	0.512161	0.15321	1.45941	0.691672	3.14654	2.70875	1.69412	0.73436	1.90934	2.97799	0.995911	1.91993	1.02103	1.01698	0.880785
ENSMUSG00000005980	Dnase1	0	5.5332	7.23567	1.22327	0	1.50681	7.69725	0	0.978731	0	0	0	0	0.831801	0
ENSMUSG00000005981	Trap1	3.45712	6.31466	4.68368	2.60351	7.01048	7.66426	9.44194	6.11577	5.89282	15.4282	4.36836	5.98081	4.20337	4.09045	5.40353
ENSMUSG00000005982	Naa60	14.5112	10.6144	13.611	23.5835	17.675	15.2091	10.7233	9.00726	13.6103	13.5622	12.8002	14.6614	11.5313	15.4937	12.032
ENSMUSG00000005983	1700037C18Rik	0	0	0	0	0	0	5.4599	4.76814	5.64495	0	0	0	6.55235	0	6.01717
ENSMUSG00000005986	Ankrd13d	7.90388	3.87848	5.00482	4.60229	4.9968	3.79212	6.24656	1.9076	2.58572	6.42519	6.22371	5.03737	7.22767	7.93961	4.15843
ENSMUSG00000005994	Tyrp1	0	0	0	0	0	0	0	0	0	0	0	0	0	0	0
ENSMUSG00000006005	Tpr	8.13005	31.2594	6.44103	7.73545	13.1818	12.6575	15.8801	14.1923	6.48459	8.02235	9.00802	7.57209	8.07126	8.11585	10.1814
ENSMUSG00000006007	Pdc	0	0	0	0	0	0	0	0	0	0	0	0	0.00329496	0	0
ENSMUSG00000006010	BC003331	6.49552	4.68908	6.35195	4.57021	6.0647	0	0	6.27549	5.24534	4.58264	0	4.46444	4.2502	4.42698	0
ENSMUSG00000006014	Prg4	0	0	0	0	0	0	0	0	0	0	0	0	0	0	0
ENSMUSG00000006019	Dhx34	2.91873	5.61783	3.56199	2.84099	2.42378	4.19425	9.32447	1.77903	4.90569	6.96718	1.8979	3.52733	3.02247	3.02708	4.7983
ENSMUSG00000006021	Kptn	1.51678	0.111677	0.857605	2.48098	2.62916	1.94042	2.8034	4.60489	1.07692	1.17034	0.809386	1.40198	2.52778	1.12567	2.55403
ENSMUSG00000006024	Napa	10.8853	12.8769	8.25206	18.4902	19.1134	20.3929	25.9877	12.9956	22.3907	17.1071	10.969	15.8765	21.0167	16.4888	20.5321
ENSMUSG00000006050	Sra1	5.53673	12.3624	4.45559	5.00107	10.9196	8.99129	6.8165	9.31116	6.48905	10.4636	4.64396	13.3541	8.3825	4.77876	4.2758
ENSMUSG00000006056	Calcoco2	0	0	0	0	0	0	0	0	0	0	0.0504052	0	0	0	0
ENSMUSG00000006057	Atp5g1	1.3301	2.05934	0.677745	0.654452	1.40979	1.55704	2.50146	0.723538	0.442674	0.552404	0.580549	0.415511	0.658759	1.0583	1.15055
ENSMUSG00000006058	Snf8	5.08666	4.91805	3.6771	11.4045	5.99145	6.36941	8.00318	5.22776	6.31722	2.5374	5.48844	5.0029	4.04389	6.36696	5.09281
ENSMUSG00000006095	Tbcb	11.4507	4.54832	3.49199	12.7994	16.2507	13.5712	10.7603	19.3449	11.5745	8.234	7.42122	10.9875	9.93442	9.20032	9.23489
ENSMUSG00000006127	Inpp5k	6.73335	19.9585	8.81142	11.2446	7.23491	5.70133	3.8202	7.28318	8.61491	13.4328	9.81806	18.8363	11.4964	11.136	7.74702
ENSMUSG00000006134	Crkl	4.32032	5.19856	9.4321	6.1275	8.10561	7.75353	10.4971	10.4217	8.93175	7.99463	9.57229	8.2642	8.7284	9.27237	7.79683
ENSMUSG00000006143	Upk3bl	0	0	0	0	0	0	0	0	0	0	0	0	0	0	0
ENSMUSG00000006154	Eps8l1	23.1526	5.74107	13.8351	3.21891	3.29727	4.62229	8.8681	5.57324	7.72929	5.90617	8.57424	15.3542	6.52819	9.21142	2.75194
ENSMUSG00000006169	Clint1	8.03467	14.0449	13.1719	17.1117	23.1164	19.4779	14.5712	17.0081	18.9366	15.105	11.0334	11.5746	12.2205	16.8572	16.8206
ENSMUSG00000006179	Prss16	0	0	0	0	0	0	0	0	0	0	0	0	0	0	0
ENSMUSG00000006191	Cdkal1	5.39732	1.10453	5.14302	9.40242	5.6126	2.14451	5.37443	6.50743	4.6972	2.63019	7.25546	6.87537	3.99343	6.10765	2.98689
ENSMUSG00000006200	Rhox6	0	0	0	0	0	0	0	0	0	0	0	0	0	0	0
ENSMUSG00000006204	5430419D17Rik	0	0	0	0	0	0	0	0	0	0.00152978	0	0.0057905	0	0	0.00147839
ENSMUSG00000006205	Htra1	0	0	0	0.0401984	0.0748179	0	0	0.0178435	0	0.391438	0	0.136008	0	0.090779	0
ENSMUSG00000006215	Zbtb17	0	0	0	0	0	0	0	0	0	0	0	0	0	0	0
ENSMUSG00000006216	Clcnkb	0	0	0	0	0.182086	0	0	0	0	0	0	0	0	0	0
ENSMUSG00000006218	Fam131c	0	0	0	0	0	0	0	0	0	0	0	0	0	0	0
ENSMUSG00000006219	Fblim1	1.54269	2.07744	3.3861	3.79047	5.03585	9.31515	3.89054	3.12136	3.75804	11.4036	3.44431	5.12012	4.85151	5.129	3.38796
ENSMUSG00000006221	Hspb7	0	0	0	0	0	0	0	0	0	0	0	0	0	0	0
ENSMUSG00000006235	Epor	0.668044	0.762571	0.0515121	0.0585419	0.621426	0.61661	0	0.395753	0.0305233	0	0	0.28585	0.0787185	0.369179	0.263281
ENSMUSG00000006241	Ccdc159	0	0	0	0	0	0	0	0	0	0	0	0	0	0	0
ENSMUSG00000006262	Mob1b	3.31895	6.97474	6.75481	10.2774	4.68611	4.60403	6.0122	4.97562	4.37505	4.13785	3.41198	3.89067	3.79066	4.95542	3.58298
ENSMUSG00000006269	Atp6v1b1	0	0	0.0134501	0	0	0	0.0284289	0.0263441	0.253766	0.76338	0.269393	0.0219432	0.0249426	0.181943	0.0292709
ENSMUSG00000006270	Vax1	0	0	0	0.107979	0	0	0	0	0	0	0	0	0.267472	0.0859655	0
ENSMUSG00000006273	Atp6v1b2	8.97082	14.7149	13.5511	9.52512	18.8674	18.3956	16.0643	13.3722	10.2466	9.70202	9.70474	10.9475	10.7392	13.0511	12.1435
ENSMUSG00000006276	Eps15l1	18.0618	7.61291	13.9408	16.958	12.4816	10.8904	12.0591	9.04151	11.3567	15.4691	28.4083	18.5574	12.5238	16.7826	10.2857
ENSMUSG00000006281	Tep1	4.46259	2.23742	2.84634	4.1858	6.81391	7.36251	5.67195	6.87123	3.40621	3.61109	3.67604	5.61228	4.13272	6.52966	6.7503
ENSMUSG00000006288	Ttc5	28.9444	17.1129	14.8255	13.7516	13.3091	11.6823	10.5304	11.2178	12.1813	12.1711	14.107	8.67032	13.6678	12.3519	9.20653
ENSMUSG00000006289	Osgep	3.65644	9.52987	2.67278	6.17177	4.5319	2.28786	3.71588	3.55315	3.5875	6.86487	5.8628	4.89193	5.75263	3.80474	3.63443
ENSMUSG00000006299	Aamp	4.7328	5.58117	7.17696	5.6773	6.74296	6.21033	10.1402	2.76679	10.2429	5.59003	5.76677	6.99454	6.11411	6.7575	4.81199
ENSMUSG00000006301	Tmbim1	11.7788	5.102	7.71651	8.35866	16.9892	17.9813	20.2344	11.6872	9.8372	7.25683	8.58365	9.9338	7.4075	7.10765	6.01969
ENSMUSG00000006304	Arpc2	38.9032	50.2816	41.283	66.6741	105.692	95.8992	105.798	90.2566	71.5331	57.9604	61.6316	59.7414	42.3849	46.9522	51.004
ENSMUSG00000006307	Kmt2b	11.0346	3.42632	22.2513	14.093	21.7842	4.87869	5.35532	4.7187	4.46545	4.61981	26.652	19.1479	5.39755	4.94572	18.7768
ENSMUSG00000006310	Zbtb32	0.216	0	0.0681388	0.0669143	0.0715533	0.166487	0	0.122396	0.151846	0.046045	0.0146951	0	0.0958334	0.184886	0.355053
ENSMUSG00000006311	Etv2	0	0	0	0	0	0	0	0	0	0	0	0	0	0	0
ENSMUSG00000006313	Upk1a	0	0	0	0	0	0.0687647	0.124387	0.0533008	0	0	0	0	0.00874394	0.0472037	0
ENSMUSG00000006315	Tmem147	10.743	1.93198	4.38262	4.68842	6.49913	5.56242	7.13211	6.28275	7.48544	4.19063	8.43183	5.63763	6.48222	6.44622	4.54214
ENSMUSG00000006333	Rps9	53.372	36.1722	50.7547	60.2818	115.34	99.6069	88.6479	76.8614	64.4163	61.4514	47.6624	61.4854	57.324	93.141	92.2482
ENSMUSG00000006335	Tfpt	2.93593	2.88289	2.57218	2.43011	1.34202	5.12756	0	2.48568	9.39924	7.10179	2.06794	2.04521	1.37461	2.84332	3.09501
ENSMUSG00000006342	Susd2	0	0.115811	0.00269459	0.313362	0.0498446	0	0	0	0	0.0398527	0	0.0077754	0.0212801	0.0287494	0
ENSMUSG00000006344	Ggt5	5.12665	3.57178	1.97975	6.04136	4.74331	2.11923	3.64737	4.12396	5.89908	6.82834	4.04449	4.60363	4.64464	4.04243	4.31123
ENSMUSG00000006345	Ggt1	0.2262	0	0	0	0	0	0	0.0113064	0	0	0	0	0	0.0187693	0
ENSMUSG00000006356	Crip2	0	0	0	0	0	1.8746	0	0	0	0	0	0	0	0.0102335	0.118738
ENSMUSG00000006360	Crip1	0	0.804535	0.185548	0.27814	1.57972	2.20632	0.63641	1.65437	0.504724	0.128877	0.258514	0.147135	1.25263	1.20712	0.920482
ENSMUSG00000006369	Fbln1	0.184636	0	0	0.162153	0.793345	0.358282	0.897095	0.824867	0.313618	0.0858599	0.715075	0.0882933	0.300707	0.351247	0.331949
ENSMUSG00000006373	Pgrmc1	2.20319	0.952272	2.86832	1.8343	1.60381	1.97227	2.78623	1.73742	2.38197	2.36119	2.43854	2.37119	2.05307	1.50848	1.83124
ENSMUSG00000006378	Gcat	0.377207	0	0	0	0.135232	0.072171	0.189933	0.213026	0	0	0.039371	0.023618	0	0.145172	0.0284285
ENSMUSG00000006386	Tek	0	0	0	0	0	0	0	0	0	0.0235984	0	0	0	0	0.00384528
ENSMUSG00000006389	Mpl	0	0	0	0	0	0	0	0	0	0	0	0	0	0	0
ENSMUSG00000006390	Elovl1	14.2311	18.0608	21.3316	11.6917	27.7401	32.4002	31.0429	31.5456	31.3948	14.7513	15.3076	16.0548	25.7185	15.9482	20.2014
ENSMUSG00000006392	Med8	5.43717	3.55746	14.7756	6.39146	11.2263	5.38896	7.48514	7.01686	5.08966	8.07504	5.43856	8.59848	9.46144	6.87179	6.68189
ENSMUSG00000006395	Hyi	0	0	5.79804	15.7854	0	6.31063	0	6.12042	10.2523	0	0	5.89503	8.52661	7.41073	7.76347
ENSMUSG00000006398	Cdc20	0	0	0	0	4.3687	10.8194	0	9.61518	0	0	0	0	0	5.01966	0
ENSMUSG00000006403	Adamts4	0	0	0	0	0	0	0	0	0	0	0	0	0	0	0
ENSMUSG00000006411	Nectin4	6.0119	4.46053	2.32746	3.8596	4.07646	3.78241	4.44868	4.09255	3.88279	4.32419	3.53988	3.92554	2.08365	4.37097	4.50086
ENSMUSG00000006412	Pfdn2	7.59197	10.8931	13.037	5.15238	7.36433	8.48724	4.68527	8.90121	9.64549	7.26937	3.20663	7.02312	9.36048	5.7694	3.99875
ENSMUSG00000006418	Rnf114	6.01617	13.8224	16.9905	14.4693	19.4295	19.0295	18.3253	14.5023	18.9981	14.5521	10.7861	16.1826	15.0547	15.1756	15.836
ENSMUSG00000006423	C330007P06Rik	2.82797	2.74661	5.31886	2.88751	3.3449	2.23611	2.84778	3.02333	4.17182	3.87688	5.3177	4.01555	4.60619	2.97797	2.64676
ENSMUSG00000006435	Neurl1a	6.13009	3.7968	4.25379	6.97447	5.06028	4.52464	5.34134	3.06836	5.55612	5.38142	4.6807	5.74814	5.28132	4.67111	5.13553
ENSMUSG00000006442	Srm	3.79937	0.360008	5.05756	1.92471	14.2649	12.2029	17.9292	5.25844	2.05648	4.24392	3.36289	4.84559	4.49862	2.91056	5.26306
ENSMUSG00000006445	Epha2	1.12417	0.466676	1.53398	1.56399	3.78076	2.37604	3.25373	4.03358	3.24668	2.67583	2.28526	4.72639	3.02797	2.11558	1.39488
ENSMUSG00000006456	Rbm14	9.68959	10.6428	10.6646	9.85772	8.58049	6.33369	10.6851	7.65559	11.6903	5.40678	2.77286	4.40241	9.52221	7.54468	5.03018
ENSMUSG00000006457	Actn3	0.496708	0.0411256	0.94378	0.486768	0.0707538	0.0423194	0.0142371	0.104341	0.354347	0.0923902	0.160835	0.333274	0.967392	0.330007	0.59776
ENSMUSG00000006462	A530013C23Rik	0.0114857	0.0344985	0.14188	0.563738	0.0180326	0.275433	0.0408868	0.216214	0.00633766	0.644117	0.0325262	0.130418	0.456221	0.152008	0.181585
ENSMUSG00000006463	Zdhhc24	4.30231	7.55741	3.02303	10.0197	4.66564	2.77224	5.96099	5.11652	4.0291	7.49469	3.54777	5.02198	7.44494	5.94169	4.56417
ENSMUSG00000006464	Bbs1	0.105827	0	0.256053	0.116225	0.46518	0.122431	0.05687	0.721459	0.298233	0.233725	1.16876	0.419966	0.375421	0.938845	0.513
ENSMUSG00000006469	Slc34a3	0	0	0	0	0	0	0	0	0	0	0	0	0	0	0
ENSMUSG00000006471	Ndor1	9.07418	12.5757	3.25281	10.4856	11.0685	5.90588	20.0114	22.9618	5.15802	30.335	17.5816	11.1592	16.0531	9.51902	12.6448
ENSMUSG00000006476	Nsmf	3.16913	9.83918	3.64602	1.02649	3.81969	1.82697	2.62932	6.18177	4.80295	2.10925	1.82545	4.31749	5.92399	6.94788	2.36897
ENSMUSG00000006488	Prl7a1	0	0	0	0	0	0	0	0	0	0	0	0	0	0	0
ENSMUSG00000006490	Prl8a9	0	0	0	0	0	0	0	0	0	0.0137442	0	0	0	0	0
ENSMUSG00000006494	Pdk1	10.4198	18.2839	17.1285	7.51936	11.49	10.5622	7.03439	6.91459	11.5372	14.2445	14.1347	13.9366	8.52109	13.3785	8.6358
ENSMUSG00000006498	Ptbp1	63.0253	50.2388	38.7935	38.1043	44.0209	42.9448	60.4004	37.7457	34.6428	37.535	38.6525	31.5318	48.3953	23.3336	29.0398
ENSMUSG00000006522	Itih3	0	0	0	0.00583129	0.407656	0	0	0	0.0380746	0.00402839	0.0972	0.108037	0.976432	0.123426	0
ENSMUSG00000006526	Tmem110	1.21929	1.00884	3.6065	5.50296	2.49302	5.92019	3.60402	1.33269	1.90509	1.74091	1.61123	1.64009	1.51561	2.78006	6.93391
ENSMUSG00000006527	Sfmbt1	6.91709	4.22257	6.99667	3.50989	6.21921	6.74993	5.63649	7.74847	5.89643	7.67785	5.98177	8.19545	5.19319	4.27533	6.38932
ENSMUSG00000006529	Itih1	0	0	0	0	0	0	0	0	0	0	0	0	0	0	0
ENSMUSG00000006538	Ihh	0	0	0.00462189	0	0	0	0	0	0	0	0	0	0.0440804	0.042123	0
ENSMUSG00000006542	Prkag3	0.192204	0	0.555062	0.267988	0.0937167	0.0578531	0	0	0.0166323	0.111274	0.569473	0.0722712	0.294001	0.295959	0.0226813
ENSMUSG00000006546	Cryba2	0.0181217	0	0.0209817	0	0	0	0	0	0	0	0.0126843	0	0	0	0
ENSMUSG00000006567	Atp7b	0	0	0	0.216197	0	0.00952734	0.0516083	0.00573476	0	0.04556	0	0.0252693	0.0521629	0.0246518	0.00149144
ENSMUSG00000006570	Defb2	0	0	0	0	0	0	0	0	0	0	0	0	0	0	0
ENSMUSG00000006574	Slc4a1	0	0	0	0	0	0.00582669	0	0	0	0	0	0	0	0	0
ENSMUSG00000006575	Rundc3a	0.245748	0.191821	0.145889	0.0633649	0.857811	0.0986398	1.57745	0.611948	0.13428	0.0209696	0	0.871978	0.0550654	0.177919	0.738497
ENSMUSG00000006576	Slc4a3	0.141727	0	0.0965622	0.00745858	0	0	0.977375	0.439172	0	0	0	0	0.0197333	0.0434263	0.0398221
ENSMUSG00000006586	Runx1t1	0.0820338	0.162793	0.268718	0.0469431	0.135302	0	0	0	0.184953	0	0.00190764	0.517903	0.0114439	0.185355	0.0266071
ENSMUSG00000006599	Gtf2h1	1.01832	2.48301	2.66242	3.76896	4.09409	3.84373	4.34975	1.99997	2.98231	1.66574	1.80447	5.04681	2.71477	2.06318	2.8186
ENSMUSG00000006611	Hfe	14.0575	4.85675	12.077	8.96312	19.6234	27.4834	10.6173	20.6773	13.9839	8.9704	19.5518	7.6072	9.68666	11.1132	9.6887
ENSMUSG00000006638	Abhd1	0	0	0	0	0	0	0	0	0	0	0	0	0	0	0
ENSMUSG00000006641	Slc5a6	0	0	0	0	0	0	0	0	0	1.1482	0	0	0	0	0
ENSMUSG00000006642	Tcf23	0	0	0	0	0	0	0	0	0	0	0	0	0	0	0
ENSMUSG00000006649	Nphs1	0.0142775	0	0.048466	0.00639777	0.0902886	0.0447648	0.0322276	0.0901375	0.00808856	0.00652105	0.00583965	0	0.0202046	0.0616225	0.0535993
ENSMUSG00000006651	Aplp1	0.0813156	0.276563	0.0216855	0.101678	1.16028	1.18954	0	0.369228	1.35808	0.265939	0.710108	0.234742	0.371619	0.147202	0.265108
ENSMUSG00000006673	Qrich1	22.5974	13.6364	32.5539	16.9517	17.6571	17.3179	19.1954	18.5316	18.0426	17.8722	16	15.6138	13.7929	16.0451	16.0834
ENSMUSG00000006675	P4htm	0	0	0	0	0.0271694	0	0	0.0121658	0	0.0453323	0	0.00875539	0.138424	0.00748072	0.0311389
ENSMUSG00000006676	Usp19	11.9817	13.794	8.99227	7.99079	9.07918	19.5337	5.99847	11.0346	11.191	9.46731	6.82136	13.7018	11.1375	9.64809	8.76308
ENSMUSG00000006678	Pola1	0.124891	0.429472	0.370256	0.441001	0.982187	0.927123	0.660153	1.50419	0.333918	0.131238	0.155487	0.418759	0.456792	0.46557	0.501308
ENSMUSG00000006699	Cdc42	40.073	48.8575	51.0054	54.6174	61.7217	60.0053	68.4977	61.1332	49.0562	45.3913	44.0803	52.8589	44.4366	48.4695	48.0253
ENSMUSG00000006705	Pknox1	6.4932	7.11531	4.30058	5.48298	3.44839	2.641	5.59606	3.23952	4.87587	4.52262	15.0364	3.78106	6.16547	4.45005	8.0818
ENSMUSG00000006711	D130043K22Rik	0	0	0	0.0316756	0	0	0	0	0	0.0101567	0	0	0	0	0
ENSMUSG00000006715	Gmnn	0.134048	0.178936	0.444883	0.531656	0.562993	0.525948	1.58386	2.18446	0.0338408	0.40825	2.20244	0.184394	0.298972	0.836723	0.422158
ENSMUSG00000006717	Acot13	20.7124	2.66328	5.26545	1.72956	8.716	4.08889	5.61571	4.19917	1.93265	5.21752	3.29456	4.36118	3.70759	4.79113	4.50628
ENSMUSG00000006720	Zfp184	0.444945	1.03955	0.130379	0.116364	0.103013	0.172771	0.0669545	0.115317	1.91164	2.24858	0.314432	0.393707	1.18085	0.274879	0.611853
ENSMUSG00000006724	Cyp27b1	0	0	0	0.0769552	0.0339721	0	0.00563911	0.0207132	0.0143351	0	0	0	0.149131	0.0275679	0
ENSMUSG00000006728	Cdk4	5.07123	11.6759	8.70291	6.60669	13.5995	12.3886	11.4702	13.9514	5.67261	11.3373	9.20755	9.291	8.88511	7.43537	13.2019
ENSMUSG00000006731	B4galnt1	16.4321	6.54067	8.77188	13.5098	41.0479	23.4834	35.0484	27.3473	12.7468	11.7839	24.804	13.5277	16.5591	21.8257	27.2512
ENSMUSG00000006732	Mettl1	2.70474	0.37156	0.481992	1.05355	4.26	1.27591	2.63656	1.13606	1.67346	2.01185	0.634252	1.57033	1.45342	0.738825	2.17308
ENSMUSG00000006736	Tspan31	17.807	16.371	20.3555	23.9151	32.1903	25.8197	19.4156	25.5499	20.8151	18.0522	24.4872	15.0757	28.4387	18.7393	14.0713
ENSMUSG00000006740	Kif5b	4.22965	11.7995	21.5203	5.71471	11.3327	14.1591	14.606	13.5547	11.672	5.68124	8.51826	6.56879	8.67688	8.06224	7.77811
ENSMUSG00000006763	Saal1	2.42521	1.70565	2.58393	3.47704	3.42306	4.55104	7.73197	3.52107	4.87036	1.80186	7.78294	3.96821	3.24055	4.25558	3.06435
ENSMUSG00000006764	Tph2	0	0	0	0	0	0	0	0	0	0	0	0	0	0	0
ENSMUSG00000006777	Krt23	0	0	0	0	0	0	0	0	0	0	0	0	0	0	0
ENSMUSG00000006782	Cnp	8.34924	0	9.02536	15.8511	7.47497	11.7401	0	6.35842	6.90463	9.54764	12.96	8.1627	10.3263	9.08128	6.49813
ENSMUSG00000006784	Ttc25	0.18216	1.28868	0	0.115971	0.154838	0.633473	0.210034	0.0523118	0.15235	0.253477	0.50905	0.082143	0.770653	0.54097	0.306265
ENSMUSG00000006800	Sulf2	0	0	0	0	0	6.81848	0	0	0	0	0	0	0	0	0
ENSMUSG00000006818	Sod2	0.686617	2.94052	2.07183	2.87094	3.18001	4.33789	3.40466	1.98675	1.51967	2.0385	1.36172	1.54216	1.30467	1.92677	1.7608
ENSMUSG00000006850	Tmco6	7.78895	5.69132	5.47494	4.73386	3.25704	2.38072	3.54351	1.6737	5.74538	5.70343	4.6751	5.58391	5.78548	5.35751	5.2663
ENSMUSG00000006906	Stambp	1.82307	2.32985	1.02315	5.34304	3.56365	3.21349	2.39634	2.15477	4.41249	6.81698	2.42983	1.73569	5.02022	2.27092	2.14489
ENSMUSG00000006920	Ezh1	6.71177	4.4457	8.14751	10.7211	4.87122	3.13917	5.92459	3.17326	6.4509	5.98858	12.0414	5.40613	6.02864	5.64531	6.9043
ENSMUSG00000006930	Hap1	0	0.397997	0.0714362	0	0.121181	0.89299	0.0589928	0.200117	0.505999	0.231037	0.0644476	0.128215	0.069194	0.342083	1.03989
ENSMUSG00000006931	P3h4	0.0580449	0.12544	0.953715	0.191181	0.548444	0.30232	0.00655424	0.717255	0.0930413	0.0694829	0.0377637	0.602915	0.116248	0.149738	0.221678
ENSMUSG00000006932	Ctnnb1	60.1892	42.1537	39.7218	54.5409	62.5381	48.2545	34.7177	44.2895	40.3446	33.4819	34.0422	36.5849	39.2419	36.3523	30.4
ENSMUSG00000006941	Eif1b	8.21489	3.51713	5.54818	7.94357	8.76435	6.50985	9.71002	6.09348	7.05654	9.09337	14.4474	5.29908	4.92984	5.11641	6.43177
ENSMUSG00000006948	Klk4	0	0	0	0	0	0	0	0	0	0	0	0	0	0	0
ENSMUSG00000006958	Chrd	0	0	0	0	0	0	0	0	0	0	0	0	0	0	0
ENSMUSG00000006998	Psmd2	5.40729	11.7274	3.46762	2.79731	4.74145	6.48664	3.5115	3.93704	2.44597	3.34804	3.44145	3.5586	3.71301	2.96861	2.65018
ENSMUSG00000007021	Syngr3	0	0	0	0	0.00870785	0	0	0	0	0.00689055	0.00667281	0	0.303634	0.191826	0
ENSMUSG00000007029	Vars	8.27778	15.4012	2.85492	5.27161	9.32959	16.5861	14.9443	11.9254	2.84545	6.9103	6.18251	8.45292	7.06848	6.97253	5.29713
ENSMUSG00000007030	Vwa7	0.241247	0.410372	0.101412	0.0253014	0.318269	0.0345834	0.107794	0.0284014	0.153714	0.0918798	0.052846	0.516445	0.17152	0.278498	0.166534
ENSMUSG00000007033	Hspa1l	0	0	0	0	0.0488308	0.799285	0.839092	0.219949	0	0.161871	0.172835	0.454552	0.349073	0.533651	1.05779
ENSMUSG00000007034	Slc44a4	0	0	0	0	0	0	0	0	0	0	0.00545031	0	0	0	0
ENSMUSG00000007035	Msh5	0.83232	0.317988	0.341822	0.822679	0.709146	1.69774	1.15049	1.17905	1.33474	2.87829	0.404094	1.41634	0.765523	1.36903	0.81036
ENSMUSG00000007036	Abhd16a	8.33644	5.26229	4.68432	7.26223	6.4237	4.44038	8.6014	5.95744	5.72997	5.10811	13.5864	6.09005	6.60574	9.11548	10.1577
ENSMUSG00000007038	Neu1	3.01905	1.69862	2.20335	2.40363	5.09276	3.4359	4.36388	3.45659	5.03787	5.17693	3.50382	2.71787	3.80492	3.22809	3.92289
ENSMUSG00000007039	Ddah2	2.01636	3.00563	3.39215	3.91385	4.32037	2.7431	7.21783	2.62952	4.85571	10.8686	3.34223	7.42369	3.5394	5.37391	1.79149
ENSMUSG00000007041	Clic1	12.434	17.7597	21.2065	14.8292	32.2153	28.1852	16.8042	34.5628	35.8004	26.6535	38.2713	22.8218	23.4622	30.2788	32.8423
ENSMUSG00000007050	Lsm2	12.9512	3.73849	10.1927	7.97804	16.6093	36.0152	19.4817	45.5431	5.6193	23.5858	25.3433	12.913	12.451	7.72255	6.84674
ENSMUSG00000007080	Pole	0.0585458	0	0.143211	0.168289	0.881059	2.95792	1.29828	2.35325	0.0181544	0.0270382	0.440589	0.0635291	0.501613	0.313651	0.0932884
ENSMUSG00000007097	Atp1a2	0	0	0.203474	0	0.913072	0	0.271491	0.461051	0.3618	0.806983	0	0	0.552636	0.313615	0
ENSMUSG00000007107	Atp1a4	0	0	0	0	0	0	0	0	0	0	0	0	0	0	0
ENSMUSG00000007122	Casq1	0	0	0	0.0928293	0	0	0	0.0923984	0.230661	0	0	0.297719	0	0.0761723	0.33106
ENSMUSG00000007207	Stx1a	0.0694177	0	1.75218	1.85653	0.642673	0.0387942	1.05448	0.861604	0.626213	2.11205	0.388933	0.84081	0.630883	1.00737	0.585014
ENSMUSG00000007209	Ceacam9	0	0	0	0	0	0	0	0	0	0	0	0	0	0	0
ENSMUSG00000007216	Zfp775	0.575834	0.342107	0.409286	0	0.409163	0.583142	0	0.19949	0.973306	0.420214	0	0.648674	0.764118	0.337318	0.497131
ENSMUSG00000007279	Scube2	0	0	0	0	0	0	0	0	0	0	0	0	0	0	0
ENSMUSG00000007338	Mrpl49	0	3.11673	3.87326	0	6.01399	3.63439	7.42811	6.75603	5.06521	4.521	0	4.36348	4.50464	3.54326	3.97199
ENSMUSG00000007379	Dennd2c	2.77442	4.64186	4.1317	2.88971	4.11469	2.90805	4.40981	3.3351	6.02903	3.85223	5.24885	5.54427	4.25582	3.62321	3.49329
ENSMUSG00000007411	Mark3	22.9415	9.12707	16.2584	10.6119	11.78	9.27891	10.3789	18.1568	9.98882	13.6443	10.7715	14.4812	10.6033	11.6376	18.373
ENSMUSG00000007415	Gatad1	0	12.9641	24.4075	5.65007	4.78859	15.6567	5.19421	5.29381	6.69739	4.93439	0	5.38349	6.89313	4.97799	0
ENSMUSG00000007440	Pcdha11	0	0	0	0	0	0	0	0	0	0	0	0	0	0	0
ENSMUSG00000007457	2310003L06Rik	0	0	0	0	0	0	0	0	0	0	0	0	0	0	0
ENSMUSG00000007458	M6pr	10.7842	11.9487	12.9711	13.3894	24.647	24.0747	22.2355	19.7849	17.2548	15.652	14.2037	16.2411	13.404	14.5672	14.661
ENSMUSG00000007476	Lrrc8a	21.4121	9.36491	16.2117	11.1121	14.0938	12.94	18.2419	15.4656	13.7406	14.4298	17.9393	18.2047	14.9404	12.114	9.39146
ENSMUSG00000007480	Mc5r	0	0	0	0	0.0274826	0	0	0	0	0	0	0.0156072	0	0	0
ENSMUSG00000007564	Ppp2r1a	8.23468	6.13062	7.44825	7.77215	11.1288	10.3145	10.739	9.45359	6.3596	12.1361	11.9677	8.18154	8.41646	7.68408	6.7949
ENSMUSG00000007570	Fance	5.68409	11.9665	11.7826	9.10032	14.2505	15.4217	22.3155	5.9987	5.21038	13.3538	28.509	8.47438	22.8885	16.7091	9.82897
ENSMUSG00000007589	Tinf2	13.4195	4.05495	7.97244	4.68758	9.23812	12.3724	2.12329	6.64685	9.24285	3.64709	4.95654	9.14824	9.77209	6.72207	4.95816
ENSMUSG00000007591	Tssk4	0.199041	0.242242	0.244691	0.39514	0.14003	0.053869	0.773023	0.861798	0.0769893	0.0811478	0	0.313121	0.317841	0.0207654	0.317746
ENSMUSG00000007594	Hapln4	0	0	0	0.00779529	0.00910713	0	0	0	0	0	0	0	0.0241272	0.544799	0
ENSMUSG00000007603	Dus3l	3.91088	2.75794	3.22193	2.38766	6.11479	5.03667	7.47927	3.29312	5.63838	4.56607	4.96106	4.40468	4.64094	4.18643	4.97742
ENSMUSG00000007610	Gtpbp3	0.627353	2.27038	3.17303	3.44742	2.33304	2.6126	2.08908	2.62845	2.66562	2.21029	3.91548	3.08718	1.58698	1.96122	2.78777
ENSMUSG00000007613	Tgfbr1	95.814	142.88	144.339	109.583	64.1863	81.0359	76.9112	67.3382	128.643	110.476	108.633	110.71	98.4178	89.0592	78.9006
ENSMUSG00000007617	Homer1	0.658186	0.735011	1.21675	0.652276	1.5091	1.77638	2.02216	2.90816	1.0055	1.21708	3.64026	0.746755	0.682365	0.694874	0.91088
ENSMUSG00000007646	Rad51c	0.00335257	0	1.67171	0.0297728	0.309463	1.65575	0.242139	1.4234	0	0.00320645	0	0.0310474	0.135152	0.197774	0.00346768
ENSMUSG00000007653	Gabrb2	0	0	0	0	0	0	0	0	0	0	0	0	0	0	0
ENSMUSG00000007655	Cav1	0.0849995	0.229499	0.0571984	0.190555	0.0991676	0.0806553	0	0.0988406	0.52608	0.214656	0.552117	0.526417	1.20509	0.583328	0.40579
ENSMUSG00000007656	Arpp19	10.3866	18.7709	4.62881	3.7456	4.99904	6.47675	6.04049	6.37052	5.19959	7.25615	3.83864	4.65981	5.17148	4.48953	3.67633
ENSMUSG00000007659	Bcl2l1	5.7229	15.7722	7.87481	10.5237	10.1052	6.07675	20.1771	7.77934	10.1931	11.3674	12.4939	9.37773	10.9064	6.17637	9.32392
ENSMUSG00000007670	Khsrp	9.76679	8.62528	11.0951	6.91793	11.8689	9.11228	11.9359	10.5077	9.61525	7.87927	12.2996	9.01065	9.39339	7.89886	7.30967
ENSMUSG00000007682	Dio2	0.00889213	0	0	0	0	0.0163205	0	0	0.0052533	0	0	0	0	0	0.0113717
ENSMUSG00000007721	Ccdc124	0.0961455	0.406966	2.08484	2.01411	3.77212	4.73444	4.65656	2.76995	1.93698	2.98438	1.91311	3.00944	1.99919	1.24343	3.43108
ENSMUSG00000007739	Cct4	5.0671	14.2758	18.0223	9.79979	15.7264	15.969	19.4229	13.9258	18.1707	8.21862	13.9405	11.8475	12.2141	11.7713	17.4236
ENSMUSG00000007777	0610009B22Rik	7.6038	8.57875	10.8539	6.43428	12.7616	4.03843	2.19513	11.2662	5.20711	2.52589	2.03919	12.0929	6.59732	9.38602	5.45297
ENSMUSG00000007783	Cpt1c	0	0.00696291	0.29918	0.0816584	0.114325	0.0762048	0.0451322	0.0276604	0.0936032	0.070866	0	0	0.0192659	0.432789	0.281647
ENSMUSG00000007805	Twist2	0	0	0	0	0	0	0	0	0	0	0	0	0	0	0
ENSMUSG00000007812	Zfp655	4.38	6.35181	7.10978	9.43713	9.12224	5.65555	11.6737	9.7726	5.74016	5.6122	18.4495	6.55222	5.42702	7.75619	5.50305
ENSMUSG00000007815	Rhoa	27.5258	19.5972	23.7377	18.4314	34.4374	31.7627	32.1573	31.4298	21.2951	21.4683	21.5035	22.521	22.5358	21.3459	22.653
ENSMUSG00000007817	Zmiz1	42.9752	30.701	38.2608	41.3474	34.7445	38.5372	35.4479	32.6616	40.3352	44.2951	54.0536	47.6901	52.236	37.4955	37.7732
ENSMUSG00000007827	Ankrd26	0.452494	1.18027	0.684474	1.67698	0.861265	1.13975	2.26849	0.911564	0.392507	1.17447	1.26594	0.771256	0.672702	0.650068	0.618695
ENSMUSG00000007833	Aldh16a1	2.38453	4.49496	10.8563	1.58066	16.5141	9.89575	10.5186	10.7667	0.813767	11.6609	5.20203	17.4423	11.9914	17.9879	17.5499
ENSMUSG00000007836	Hnrnpa0	7.23714	9.43914	8.86895	7.21354	8.87099	7.6016	7.1016	8.98412	8.53017	5.28657	5.05814	6.31807	6.4867	7.89212	6.62083
ENSMUSG00000007837	Prrg2	0	4.59712	1.57765	0	4.8907	0	3.00795	2.36681	0	3.559	3.77884	0	3.81129	0	2.59284
ENSMUSG00000007850	Hnrnph1	65.3471	44.7127	30.9256	36.8504	49.8728	55.5536	62.6044	51.9608	69.6475	68.2535	47.6901	65.349	35.4685	50.8095	49.1318
ENSMUSG00000007867	Ift43	0	0	0.13413	0	0.0599984	0.114199	0	0.980516	0	0.249258	0.177015	0.296483	0.629872	0.305929	0.292116
ENSMUSG00000007872	Id3	0	0	0	0	0	0	0	0	0	0	0	0	0	0.0116611	0
ENSMUSG00000007877	Tcap	0	0	0	0	0.0735395	0	0	0	0	0	0	0.0201805	0.0142865	0.661477	0
ENSMUSG00000007880	Arid1a	30.3842	34.3361	26.9896	24.4847	22.7237	27.3679	21.4805	40.7654	25.0459	26.0473	30.7679	27.673	28.2216	23.7259	24.7497
ENSMUSG00000007888	Crlf1	0.0376032	0	2.52271	0	0	0	0	0	0.378251	0	0	0.542656	0.0269831	0.0587127	0.0281202
ENSMUSG00000007891	Ctsd	768.336	626.95	608.958	824.848	1419.9	1135.16	789.064	805.601	924.573	933.519	877.442	745.518	899.888	947.425	973.097
ENSMUSG00000007892	Rplp1	35.6166	21.256	28.1935	52.7829	75.7183	70.8985	61.8389	64.9728	57.8322	56.6954	44.5221	49.4365	58.1132	53.299	57.3665
ENSMUSG00000007907	Cabs1	0	0	0	0	0	0	0	0	0	0	0	0	0	0	0
ENSMUSG00000007908	Hmgcll1	0	0	0	0	0	0	0	0	0	0	0	0	0	0	0
ENSMUSG00000007944	Ttc9b	0	0.612913	0	0.278424	0	0	0	0	0	0.269308	0	0	0	0	0
ENSMUSG00000007946	Phox2a	0	0	0	0	0	0	0	0	0	0	0	0	0	0	0
ENSMUSG00000007950	Abhd8	1.48267	1.50469	0.588911	0.923326	1.07257	0.997281	1.23157	0.783751	3.2221	0.783025	0.408285	0.979973	0.768791	0.636019	0.881686
ENSMUSG00000007987	Ift22	0.476341	0.413484	1.08312	2.1456	4.28473	1.029	1.7589	4.28807	0.588313	8.3483	0.486977	0.790918	2.52974	0.956426	0.754138
ENSMUSG00000007989	Fzd3	0	0	0	0.00278683	0.00109257	0	0.00967891	0	0	0.00101537	0	0	0.0268255	0.00268003	0.0333735
ENSMUSG00000008028	1700008O03Rik	0.60686	0.0313566	0.352063	0.0903231	0.173055	0.489829	0	0.479044	0.467514	4.13117	0	0.211442	0.952558	0.622042	0.0379651
ENSMUSG00000008035	Mid1ip1	7.53163	12.0328	13.4174	15.1088	10.5162	7.20867	17.7705	10.7662	14.1782	18.3872	9.21596	16.355	17.268	11.5672	10.908
ENSMUSG00000008036	Ap2s1	3.8947	2.25367	5.01308	5.61922	8.78931	6.23258	8.99566	8.5555	8.72726	7.41532	5.32768	7.80977	7.50394	5.68905	9.20987
ENSMUSG00000008090	Fgfrl1	0.254512	0.508797	0.588568	0.589772	0.668319	0.188125	0.0181581	0.652048	0.58893	0.7475	0.150598	0.285298	1.07043	0.368704	0.790181
ENSMUSG00000008129	4930432K21Rik	0.574614	0	0.297443	0.314903	0.190221	0.0591415	0.0770192	0.547322	0.168608	0.0303728	0.0344299	0.353716	0.691339	0.224009	0.248875
ENSMUSG00000008136	Fhl2	0	0	0.00594213	0	0	0	0	0	0	0	0.0574913	0.0348185	0	0.12483	0
ENSMUSG00000008140	Emc10	22.0651	9.0753	14.342	18.0426	25.3242	34.8109	30.2463	30.1275	21.0559	16.3307	36.6366	18.9051	16.3737	16.2253	17.9912
ENSMUSG00000008153	Clstn3	0	0	0.087991	0	0	0	0	0	0	0.256209	0	0	0	0.0372768	0.0067155
ENSMUSG00000008167	Fbxw9	4.11079	0	0	0	0	0	0	0	0	0	0	0	0	0	0
ENSMUSG00000008193	Spib	0	0	0	0	0	0	0	0.00880591	0	0	0	0	0.00439624	0	0
ENSMUSG00000008200	Fnbp4	19.4534	22.6729	24.8184	15.388	13.0846	21.8297	11.9495	21.5006	21.86	19.6818	22.0583	10.4572	22.2438	23.6027	25.3639
ENSMUSG00000008206	Cers4	0.042681	0.313987	0.0545983	0.0416352	0.283864	0.0434227	0	0.131985	0.27787	0.246041	3.25914	0.0812935	0.345263	0.174307	0.148535
ENSMUSG00000008226	Scrn3	4.74107	2.88579	8.89128	2.61198	4.64116	4.76557	1.33114	3.26264	3.75324	6.24547	3.36961	4.90133	3.37678	3.76264	2.59128
ENSMUSG00000008301	Phax	1.3435	6.5376	3.4556	4.82156	2.73985	6.92143	6.743	2.96006	4.5503	3.57629	2.3803	1.97759	3.10154	4.48387	2.56758
ENSMUSG00000008305	Tle1	0.560909	0.748944	6.36603	5.28061	1.24124	0.72886	1.50989	1.09253	2.45651	7.89185	5.7552	2.12863	1.90049	1.67103	2.30058
ENSMUSG00000008307	1700109H08Rik	6.01104	2.6744	8.76323	6.38272	3.71694	4.39123	5.46545	4.99037	4.83758	9.53748	4.48548	6.85918	7.0168	6.51127	9.52544
ENSMUSG00000008318	Relt	0.0285013	0.0197006	0.506657	1.75783	0.512241	0.511755	1.58692	1.31957	0.471202	0.786736	0	0.795091	0.493272	0.310122	0.242943
ENSMUSG00000008333	Snrpb2	7.72706	24.2738	14.076	9.93559	13.5529	10.9898	11.3206	10.77	10.9825	11.0466	12.5636	12.5448	11.0122	9.21809	9.21699
ENSMUSG00000008348	Ubc	7.53098	12.556	11.8875	11.778	11.3932	9.41636	10.4754	9.64657	14.0168	12.0937	12.2115	11.806	12.3679	10.6641	9.80185
ENSMUSG00000008373	Prpf31	3.60378	1.89393	4.64598	2.02364	3.44384	27.2716	9.95155	3.45125	2.40633	2.10818	3.49451	4.11322	4.47286	3.64572	5.6994
ENSMUSG00000008384	Sertad1	2.28378	0.560808	0.387733	0.531854	0.562136	0.301318	0.251679	1.15107	0.331545	0.27559	0.133106	1.32312	0.198578	1.38169	0.514957
ENSMUSG00000008393	Carhsp1	3.35908	4.15658	2.12449	1.71649	2.66815	4.15558	1.67502	3.30245	2.23414	2.0206	1.73985	3.37739	2.0901	2.85787	1.83786
ENSMUSG00000008398	Elk3	8.51423	14.6746	11.2821	22.2033	39.6166	22.8847	41.8508	36.5403	45.9745	16.7569	36.0232	36.9536	45.2167	30.1992	23.9264
ENSMUSG00000008429	Herpud2	8.98394	13.6897	14.6642	9.50022	8.64708	6.23324	8.92068	8.62646	9.55427	7.79131	7.13178	9.50877	11.7809	8.5373	10.5608
ENSMUSG00000008435	Rdh13	3.33403	1.50853	1.15207	2.38163	1.7111	1.36035	3.90733	0.807385	1.47409	2.09157	0.806282	1.61541	1.99183	1.36078	1.48015
ENSMUSG00000008438	Adam21	0	0.00587348	0.477008	0.0457992	0.0342744	0	0.448667	0.00720927	0	0	1.23105	0.00586001	0	0.0320263	0.0174968
ENSMUSG00000008450	Nutf2	0.676864	0.623172	0.845204	3.79204	2.15179	1.68524	2.75231	3.64337	1.25255	0.426219	6.23482	0.641536	2.17837	1.33688	1.19357
ENSMUSG00000008461	Fut1	0	0	0	0	0	0	0	0	0	0.00488236	0	0	0	0	0
ENSMUSG00000008475	Arpc5	30.1088	16.9001	25.251	24.8539	42.1458	40.5215	37.1058	33.8165	27.3629	26.9973	18.6366	28.7448	31.3545	34.0369	30.9197
ENSMUSG00000008482	Rnf151	0	0	0.00756107	0.11328	0.026631	0	0	0.548364	0	0.138581	0	0.0295925	0.0803026	0.0216535	0.0577857
ENSMUSG00000008489	Elavl2	0	0	0.00961848	0	0.249237	0	0	0.0110618	0	0	0	0	0	0	0
ENSMUSG00000008496	Pou2f2	13.5153	106.869	9.16566	14.2599	16.0207	73.5059	15.6405	11.6439	20.6916	15.504	12.4154	94.8171	21.0064	11.6649	14.0899
ENSMUSG00000008540	Mgst1	0	0	0	0	0	0	0	0	0	0	0	0	0	0	0
ENSMUSG00000008575	Nfib	0.128898	0	0	0.0045927	0.0580797	0.00391793	0.0606621	0.0293384	0.00897917	0	0	0.0180067	0.00937904	0.013282	0.0407866
ENSMUSG00000008590	Htr3b	0	0	0	0	0	0	0	0	0	0	0	0	0	0	0
ENSMUSG00000008601	Rab25	0	0	0	0.0472881	0.0875901	0	0	0.0225509	0.019809	0	0	0.0599842	0.0334839	0.0119933	0.102473
ENSMUSG00000008604	Ubqln4	5.18484	3.771	5.22799	5.79144	4.55485	3.70411	4.87193	4.173	3.94026	9.60881	9.91067	4.86005	5.18692	3.08916	2.37582
ENSMUSG00000008658	Rbfox1	0.757675	0.626868	1.52539	1.99019	0.816614	0.671816	0.301361	0.357573	0.596499	2.25511	0.491523	0.56826	1.88607	0.835148	1.52467
ENSMUSG00000008668	Rps18	9.50149	0	10.1309	6.87007	21.1649	19.1291	22.6234	16.9852	4.27071	6.25566	0	0	0	14.5474	12.6587
ENSMUSG00000008682	Rpl10	15.3976	18.3778	17.9678	12.9444	30.8734	23.4013	35.172	16.1192	12.7696	13.836	8.37612	12.1434	13.6952	15.807	17.2264
ENSMUSG00000008683	Rps15a	6.11405	8.28518	4.58824	25.528	41.1069	48.5242	8.87565	39.3546	19.9185	24.171	3.91773	6.59519	28.7605	28.5265	29.7826
ENSMUSG00000008690	Ncaph2	0.35026	2.40064	1.34405	1.80764	1.74976	1.78548	1.68404	3.53167	2.50091	3.4764	4.69537	0.97837	2.06404	1.5642	1.66705
ENSMUSG00000008730	Hipk1	13.301	7.43651	14.5927	13.9467	17.8104	17.9929	13.5566	16.1044	15.0692	8.77237	13.2683	13.7972	9.92043	12.5869	13.2275
ENSMUSG00000008734	Gprc5b	0	0	0	0	0	0	0	0	0	0	0	0	0	0	0
ENSMUSG00000008763	Man1a2	33.5642	12.1367	32.6113	53.0425	42.1572	43.502	39.3139	35.8033	44.8631	41.2163	30.506	42.9743	33.3659	36.4692	34.1211
ENSMUSG00000008789	Ceacam5	0	0	0	0	0	0	0	0	0	0	0	0	0	0	0
ENSMUSG00000008813	Tppp2	0	0	0	0	0	0	0	0	0	0	0	0	0	0	0
ENSMUSG00000008822	Acyp1	3.83984	4.01251	6.04917	3.92919	3.90107	8.74716	3.13077	3.29928	4.26395	7.03883	6.15872	3.06707	4.14629	4.76737	5.2828
ENSMUSG00000008843	Cldn13	0	0	0	0	0	0	0	0	0	0	0	0	0	0	0
ENSMUSG00000008845	Cd163	0	0.0061753	0	0	0	0	0	0	0	0	0	0.0061173	0	0	0
ENSMUSG00000008855	Hdac5	6.88584	17.1674	5.53079	16.3115	22.6061	78.6974	9.85806	28.9084	39.4269	29.2762	72.7753	66.7014	65.6355	45.0725	45.9259
ENSMUSG00000008859	Rala	5.40164	6.79825	3.04247	5.2614	2.45466	3.09556	1.74953	3.77308	2.35523	3.64169	5.88812	3.11806	3.67733	3.56095	2.44747
ENSMUSG00000008874	Clec3a	0	0	0	0	0	0	0	0	0	0	0	0	0	0	0
ENSMUSG00000008892	Vdac3	5.06047	2.66986	3.58528	1.76326	3.9177	4.65854	4.43108	3.99097	3.63721	3.1329	2.1051	2.80721	2.29819	3.24018	2.53771
ENSMUSG00000008932	Slc1a7	0	0	0	0	0	0	0.00693519	0	0	0	0	0	0	0	0
ENSMUSG00000008958	Vps72	6.62918	16.4007	7.40747	7.66723	4.60809	6.53399	9.1976	4.63994	7.24541	5.06641	6.87827	9.64292	4.36675	7.70228	8.23217
ENSMUSG00000008976	Gabpa	5.70522	10.6148	13.6706	12.3154	11.0981	10.2683	9.30479	12.416	15.9609	8.60679	11.7867	11.6437	9.22699	12.4207	12.2868
ENSMUSG00000008999	Bmp7	0	0	0	0	0.0167294	0	0	0.00651898	0	0.00340906	0.00312672	0	0	0	0
ENSMUSG00000009013	Dynll1	14.4631	13.4868	14.8625	11.3466	14.7372	14.3184	9.00021	19.7343	15.3174	8.50573	9.10575	7.70815	10.0644	7.49595	7.52077
ENSMUSG00000009030	Pdcl	0.936142	3.24143	2.46282	2.16942	2.73003	1.66714	3.99282	1.26406	2.09302	1.58142	1.60172	1.92742	2.77233	2.52182	2.18195
ENSMUSG00000009035	Tmem184b	12.375	11.1633	12.5078	11.0858	21.8386	13.9043	18.49	15.5906	16.6227	11.7902	26.2497	11.2215	18.1008	16.0163	21.1102
ENSMUSG00000009047	Gm5965	0	0	0	0	0	0	0	0	0	0	0	0	0	0	0
ENSMUSG00000009070	Rsph14	0	0	0	0	0	0	0	0	0	0	0	0	0	0	0
ENSMUSG00000009073	Nf2	9.71492	12.3496	8.84237	7.88077	6.39809	5.47551	20.9857	3.24081	11.3396	9.40995	22.3516	4.08306	6.8944	7.28452	7.47027
ENSMUSG00000009075	Cabp7	0.189785	0	0	0	0	0	0	0	0	0	0	0.34178	0.0825075	0.183543	0.162842
ENSMUSG00000009076	Zmat5	0	3.20604	2.13016	4.78213	3.69105	8.59951	2.67421	2.73465	3.62204	2.38162	3.05971	0.880857	2.4205	2.36112	2.44876
ENSMUSG00000009079	Ewsr1	63.1079	65.5089	59.6507	53.5857	74.5585	66.4668	78.0445	58.6771	77.277	71.2857	80.9893	63.7698	68.7498	61.9852	67.5538
ENSMUSG00000009090	Ap1b1	11.4742	18.3361	7.66703	6.72882	7.40418	6.75733	10.4205	7.26004	16.1655	9.82867	9.68413	9.57147	6.99161	5.76518	7.09897
ENSMUSG00000009092	Derl3	0	1.59409	0.249837	0.782131	0.121743	0.986424	4.75149	1.1463	0.78929	0.731054	1.49376	0.494241	3.23867	1.11156	0.476016
ENSMUSG00000009093	Gstt4	0.283242	0	0	0	0	0	0	0	0	0	0	0	0.0397836	0	0
ENSMUSG00000009097	Tbx1	0	0	0	0	0	0	0	0	0	0	0	0	0	0	0
ENSMUSG00000009108	Gnat2	0	0	0.0118315	0	0.28898	0.907398	0.120862	0	0	0.0108848	0	0.103595	0.0648918	0.0154682	0.0835041
ENSMUSG00000009112	Bcl2l13	1.91328	1.67509	1.93059	3.02989	1.28834	5.24906	1.47079	1.89034	1.84616	2.92733	1.60978	1.41378	1.06019	1.99014	1.46791
ENSMUSG00000009114	2610028H24Rik	0	0	0	0	0	0	0	0	0	0	0	0	0	0	0
ENSMUSG00000009115	Spatc1l	0	0	0	0	0	0	0	0	0	0	0	0	0	0	0
ENSMUSG00000009145	Dqx1	0.855255	0.568924	0.429945	0.753816	0.699526	0.18552	0.310891	0.469825	0.843378	0.87692	0.826985	0.861084	0.495459	0.715318	0.910751
ENSMUSG00000009185	Ccl8	0	0	0	0	0	0	0	0	0	0	0	0	0	0	0
ENSMUSG00000009207	Lnpk	5.51912	8.34749	1.5269	2.46995	3.14419	2.40367	2.50837	2.88146	3.48715	4.81556	1.66779	3.51021	4.41634	1.91944	2.27823
ENSMUSG00000009210	Prr29	0	0	0	0	0	0	0	0	0	0	0	0	0.020452	0.0813474	0
ENSMUSG00000009214	Mymk	1.95926	2.29583	3.09186	8.30109	7.92513	6.74703	5.7414	6.15324	3.01139	6.48879	1.75128	3.07521	7.06098	5.68397	7.20213
ENSMUSG00000009216	Fam163b	0	0.00611897	0	0.0235764	0.0943256	0.00468015	0	0	0	0	0	0	0.234702	0	0.00657447
ENSMUSG00000009246	Trpm5	0	0	0	0	0	0	0	0	0	0	0	0	0	0	0
ENSMUSG00000009248	Ascl2	1.16439	0.480016	0.251196	1.56354	0.667388	0.381335	0.148952	1.71322	0.574596	0.225842	0.518699	0.203135	0.835814	0.359564	0.242965
ENSMUSG00000009281	Rarres2	0	0	0	0	0	0	0	0	0	0	0	0	0	0	0
ENSMUSG00000009291	Pttg1ip	28.9202	21.1432	21.9764	25.9551	21.8355	17.8327	30.4322	19.5274	25.4931	22.5616	29.0916	23.009	19.3139	18.7711	24.2543
ENSMUSG00000009292	Trpm2	9.1783	13.6242	8.01947	10.4798	11.3836	8.33295	9.89597	7.67699	5.09918	9.18897	7.88169	9.84727	9.96052	7.56736	11.6946
ENSMUSG00000009293	Ube2g2	2.59197	3.20596	3.7089	4.95793	6.8115	5.22736	4.62982	5.96068	3.79299	5.17836	2.99662	4.68426	3.82787	4.88495	5.07707
ENSMUSG00000009350	Mpo	0	0	0	0	0.0519127	0	0.279649	0	0	0	0.00496518	0	0.00982389	0	0.00511323
ENSMUSG00000009356	Lpo	0	0	0	0	0.010312	0	0	0	0	0	0	0	0	0	0
ENSMUSG00000009376	Met	0	0.173005	0	0.0138071	0.610781	0.503234	0.100827	0.0503783	0	0.127098	0.00320464	0.116784	0.0157327	0.135996	0.0625108
ENSMUSG00000009378	Slc16a12	0	0	0	0	0	0	0	0	0	0	0	0	0	0	0
ENSMUSG00000009394	Syn2	0	0	0	0.0172037	0	0	0	0.213418	0.208621	0	0	0	0.118473	0.0438713	0.0163975
ENSMUSG00000009406	Elk1	2.29318	0.967148	0.698158	0.806983	0.585574	0.897374	1.04631	0.606831	1.33467	0.419446	0.65215	1.36263	1.53896	0.449208	1.08562
ENSMUSG00000009418	Nav1	7.92496	3.15607	3.51671	4.71724	1.81977	6.12836	2.1797	4.93048	9.14308	4.27464	3.74918	7.49123	6.21179	4.26993	4.83059
ENSMUSG00000009470	Tnpo1	6.47912	10.2484	9.70794	10.3114	7.72823	13.1227	8.04008	8.25673	9.00642	10.7288	9.40153	7.12071	8.92609	7.28773	8.73004
ENSMUSG00000009471	Myod1	0	0	0	0	0	0	0	0	0	0	0	0	0.0143591	0	0
ENSMUSG00000009487	Otog	0	0	0.00418945	0.00375455	0	0	0.003676	0	0	0	0	0	0	0	0.00281283
ENSMUSG00000009535	Rnmt	2.76269	5.09296	9.91081	3.82311	5.6629	6.72317	8.39346	4.30631	7.24361	7.38261	1.67675	5.5574	6.5793	5.10578	6.46075
ENSMUSG00000009545	Kcnq1	0	0	0	0	0	0	0	0	0	0	0	0	0	0	0
ENSMUSG00000009549	Srp14	12.773	20.5361	11.1354	9.89006	19.3957	14.3907	16.309	15.9618	12.2713	11.3016	12.4438	9.38659	11.3633	12.4054	10.1817
ENSMUSG00000009551	6330409D20Rik	0	0	0	3.11178	0	0	1.94212	0	2.62253	0	0	0	0	0	0
ENSMUSG00000009555	Cdk9	5.09389	12.5943	7.04756	6.65201	6.38645	6.72101	8.1358	8.9477	7.11647	7.95038	13.4949	7.31149	6.88787	7.99986	5.89503
ENSMUSG00000009563	Tor2a	2.68959	2.33813	4.58296	7.3488	5.11887	14.0179	8.45445	5.37015	4.67163	3.44794	3.96336	2.6141	5.42051	4.78465	5.29543
ENSMUSG00000009566	Fpgs	0	0	0	0	0	0	3.36374	0	0	0	0	0	0	0	0
ENSMUSG00000009569	Mkl2	2.57343	4.92487	3.15821	1.84123	2.39689	3.32011	3.21114	2.39283	2.0798	1.6371	4.90408	2.31467	2.61734	2.11148	1.57612
ENSMUSG00000009575	Cbx5	4.45965	5.47085	2.28312	2.55306	9.8893	16.0323	7.09346	9.69006	2.93021	2.60095	2.02078	2.35245	5.58022	5.26837	2.61298
ENSMUSG00000009580	Odam	0	0	0	0	0	0	0	0	0	0	0	0	0	0	0
ENSMUSG00000009585	Apobec3	28.6877	20.0804	21.6388	31.9139	41.1966	41.4696	50.7872	40.087	24.3367	30.6836	34.7613	27.8313	38.2024	38.7546	39.7401
ENSMUSG00000009588	St6galnac1	0	0.0286482	0.00663309	0	0	0	0	0	0.00632863	0	0.0136756	0	0	0	0.00461018
ENSMUSG00000009596	Taf7l	0	0	0	0	0	0	0	0	0	0	0	0	0.0228126	0	0
ENSMUSG00000009614	Sardh	0.873819	0.00673541	1.17851	1.21937	2.57052	0.459798	1.60894	1.55728	0.540471	0.414848	0.478323	0.298413	0.535077	0.623788	0.935357
ENSMUSG00000009621	Vav2	6.23837	12.0875	9.59611	8.93108	10.6217	7.69891	22.6833	7.62153	9.45726	9.91847	17.7155	8.97981	8.85735	10.3153	11.5637
ENSMUSG00000009628	Tex15	0	0	0.00155924	0	0	0	0	0	0	0.00579667	0	0	0.0121022	0	0
ENSMUSG00000009630	Ppp2cb	2.79513	5.88242	6.68205	8.46002	5.04205	5.64924	6.63372	6.84306	6.95082	4.38367	6.52281	4.57541	4.06208	4.0343	4.295
ENSMUSG00000009633	G0s2	0	0	0	0	0.584226	0	0	0	0	0.0767406	0	0.129803	0.0899502	0.112451	0.170607
ENSMUSG00000009640	Dmap1	4.21525	1.07736	2.89958	3.68041	2.11914	1.6423	3.24141	1.59948	2.50896	5.143	0.447747	2.13948	2.35633	3.27222	1.72412
ENSMUSG00000009646	Pla2g12b	0	0	0	0	0	0	0	0	0	0	0	0	0	0	0
ENSMUSG00000009647	Mcu	1.70903	0.971622	1.28517	0.67614	0.625942	0.607156	1.39566	1.61327	0.653496	0.949101	1.10933	1.86936	0.871827	0.551837	0.768296
ENSMUSG00000009654	Oit3	0	0	0	0	0	0	0	0.00846207	0	0	0	0	0	0	0
ENSMUSG00000009670	Tex11	0	0	0.00553544	0	0.00409672	0.407954	0	0.238567	0	0.0345006	0.11591	0.101362	0	0.326047	0
ENSMUSG00000009681	Bcr	1.00578	2.27784	1.07265	0.933736	0.742451	0.550563	1.79127	0.630418	1.02353	1.3492	0.748572	0.707626	1.00026	0.858276	0.841736
ENSMUSG00000009687	Fxyd5	5.30678	1.02397	3.89371	1.18757	40.2755	51.701	22.8849	31.644	5.24774	6.28003	0.612658	2.51814	5.92258	8.64032	26.6433
ENSMUSG00000009731	Kcnd1	19.9082	8.1291	23.5024	7.76226	7.65641	8.51842	1.66486	5.86265	13.4928	12.1091	16.7288	11.1194	11.8064	12.234	10.7877
ENSMUSG00000009733	Tfcp2	1.02804	1.79145	1.99495	1.77567	0.816494	1.07451	2.25231	0.696444	2.57505	0.948171	3.04465	1.50793	0.820943	1.73854	0.653093
ENSMUSG00000009734	Pou6f2	0	0	0.00120503	0	0	0	0	0.00339561	0	0	0	0	0.00175427	0	0.000878975
ENSMUSG00000009739	Pou6f1	3.62893	5.50467	2.33565	6.75356	2.55132	4.38472	0.678429	1.42783	3.97604	7.66702	2.21538	6.31036	7.5028	3.0739	7.99611
ENSMUSG00000009741	Ubp1	8.8168	16.3491	9.95736	11.0931	11.8666	11.797	20.833	9.92464	10.4742	10.5197	12.3775	9.9509	14.921	11.0265	12.8488
ENSMUSG00000009772	Nuak2	6.04746	4.10796	3.65577	5.65777	5.79647	5.25791	8.43574	3.01026	6.769	3.87545	2.10125	3.28583	5.62363	3.56177	4.88985
ENSMUSG00000009828	Ick	5.04342	5.69251	3.66314	4.7143	2.9765	1.57492	2.18349	1.89364	3.86329	3.26809	3.82421	3.62599	2.89625	3.24153	2.88677
ENSMUSG00000009863	Sdhb	1.11615	10.9719	9.84728	4.74275	12.8921	11.0466	5.18087	11.21	5.53591	6.93405	4.64667	4.53719	7.96979	5.191	5.54931
ENSMUSG00000009876	Cox4i2	0.38126	0	0	0	0.0227612	0	0	0	0	0	0.0351803	0	0.0173503	0.488608	0.0450992
ENSMUSG00000009894	Snap47	0.674966	3.25383	0.891519	1.36209	2.10202	1.3984	5.41147	2.22722	1.65459	1.04068	1.08293	0	2.22894	1.18451	1.8412
ENSMUSG00000009900	Wnt3a	0	0	0	0	0	0	0	0	0	0	0	0	0	0	0
ENSMUSG00000009905	Kdsr	1.16913	2.62356	2.6746	2.18084	2.54799	1.66114	2.02493	2.39762	1.98499	2.42095	1.14705	1.94149	2.33951	2.1825	1.50762
ENSMUSG00000009907	Vps4b	11.0761	24.0727	14.79	15.3718	9.645	10.222	6.08459	11.8095	5.71077	19.6563	11.5277	5.14115	5.86009	10.0776	9.5788
ENSMUSG00000009927	Rps25	17.8606	6.96431	8.20183	24.7483	30.8499	27.6074	38.4484	24.2462	15.9959	22.3424	8.92836	12.7779	17.6779	19.4429	19.8929
ENSMUSG00000009941	Nxf2	0	0	0	0	0.13523	0	0	0	0	0	0	0	0	0	0
ENSMUSG00000009995	Taz	9.0754	11.7686	9.15234	12.6419	8.95324	10.2234	11.2759	7.1797	11.5232	13.4396	19.6735	8.00246	10.0448	13.2959	10.3315
ENSMUSG00000010021	Kif19a	0	0.396445	0.179439	0.345522	0.501704	0	0.181342	0.583401	0.214661	0.214898	0.765382	0.168464	0.519874	0.941675	0.757693
ENSMUSG00000010025	Aldh3a2	9.52167	11.742	13.5523	6.56307	8.95772	12.7469	5.19492	7.96453	11.879	7.74486	8.18427	8.13723	6.20173	8.11157	5.98539
ENSMUSG00000010044	Zmynd10	0	0	0	0	0	0	0	0	0	0	0	0.0381844	0.078868	0.0270142	0.354439
ENSMUSG00000010045	Tmem115	1.79883	7.90998	2.14819	2.99531	2.39369	5.88967	2.86539	2.80636	3.23358	2.12604	3.19217	1.8294	2.72892	3.09095	2.78443
ENSMUSG00000010047	Hyal2	0.399665	1.78242	0.55235	2.18488	2.32505	3.50385	3.71093	2.27478	0.583246	1.97515	2.7033	2.50185	1.56179	1.41033	3.0475
ENSMUSG00000010048	Ifrd2	0.156177	1.59135	1.30402	2.02695	4.636	1.4909	2.86645	5.52575	5.75527	3.31614	2.59126	1.19954	0.625191	1.51115	1.93412
ENSMUSG00000010051	Hyal1	0.323334	0	0	1.83916	1.0521	0.868252	0.643169	0.57877	2.17658	3.12111	0	1.92586	1.20162	2.25816	2.18139
ENSMUSG00000010054	Tusc2	2.11286	2.38545	2.44404	0	2.17528	0	1.76354	2.12537	1.3782	1.85831	2.77533	0	4.33458	2.84393	1.78553
ENSMUSG00000010057	Nprl2	0.556105	2.07997	0.557135	1.34263	1.9325	4.49986	2.6536	0.981019	1.39541	1.68006	2.52065	2.39657	1.29368	2.59893	1.27888
ENSMUSG00000010064	Slc38a3	0	0	0	0	0	0	0.0921659	0	0	0	0.0341547	0	0.125653	0	0
ENSMUSG00000010066	Cacna2d2	0	0	0	0	0.0168421	0	0.00752194	0	0	0	0	0	0	0	0.0829825
ENSMUSG00000010067	Rassf1	1.7212	6.37645	5.57729	8.03246	6.17167	13.6123	6.14545	5.28984	5.13756	5.01135	7.89108	4.06841	6.51975	3.4038	3.75663
ENSMUSG00000010080	Epn3	0	0	0	1.15837	0	0	0.087431	0	0.0178874	0	0	0.21196	0.179342	0.0548873	0.0483794
ENSMUSG00000010086	Rnf112	0	0	0	0	0	0	0	0	0	0	0	0	0	0.0728776	0
ENSMUSG00000010095	Slc3a2	32.4222	49.8082	46.3906	41.0641	80.5073	59.4213	104.91	64.429	47.5964	41.8612	49.9508	42.3258	49.4143	43.4213	45.3651
ENSMUSG00000010097	Nxf1	86.0915	21.8042	37.1553	31.8485	36.3381	33.0227	40.9492	28.2063	46.5039	34.7984	30.9741	37.0716	42.477	27.818	27.7347
ENSMUSG00000010110	Stx5a	42.9554	24.9995	20.9771	11.6212	13.0226	13.6175	20.1619	12.9387	29.0298	29.1543	26.5994	17.2008	13.9035	28.4622	14.0517
ENSMUSG00000010122	Slc47a1	0	0	0	0	0	0	0	0	0	0	0	0	0	0	0
ENSMUSG00000010136	Pifo	0	0	0.117258	0	0.0332697	0	0	0	0	0	0	0	0	0	0
ENSMUSG00000010142	Tnfrsf13b	7.45343	6.65518	11.8497	9.62225	10.9284	8.23913	13.4187	11.5253	11.7219	8.72828	9.23047	10.454	8.56909	12.2272	11.6261
ENSMUSG00000010175	Prox1	4.96368	2.66292	2.78352	2.77343	3.29322	5.24181	2.74008	2.13063	5.1105	3.73107	3.12536	2.77495	1.83528	3.04292	4.10919
ENSMUSG00000010205	Raver1	18.9102	12.4533	15.8028	20.3646	23.8186	19.5091	22.3632	15.788	15.1719	13.4221	13.2894	15.0934	18.3928	13.0192	13.5047
ENSMUSG00000010277	2610507B11Rik	26.4524	37.1808	22.3356	20.7253	12.7805	12.85	10.6841	34.3158	8.34615	7.36451	32.9411	7.71998	20.4347	23.7481	9.14375
ENSMUSG00000010290	AI597479	2.90057	3.43372	3.14897	1.51834	2.42514	3.22638	1.23823	1.13838	1.36524	1.65255	2.83511	3.34527	1.36191	2.13725	1.95367
ENSMUSG00000010307	Tmem86a	26.0272	31.8133	29.1122	46.6185	44.9126	53.5456	37.352	33.2881	53.6125	40.6449	34.4457	54.382	52.7447	57.1088	49.5429
ENSMUSG00000010311	Optc	0	0	0	0	0	0.00826777	0	0	0	0	0.014687	0.0109282	0	0.0639074	0
ENSMUSG00000010342	Tex14	0.00276319	0.151394	0.178304	0.207669	0.0837221	0.495478	0.00510843	0.131075	0.0783324	0.774935	0	0.28006	0.197526	0.0564401	0.0160151
ENSMUSG00000010358	Ifi35	3.27281	1.37879	3.4476	4.04315	9.69568	7.02767	1.8028	3.84808	6.05257	7.2292	9.11631	6.24783	4.68358	3.18424	5.64062
ENSMUSG00000010362	Rdm1	4.16287	11.7765	3.53884	7.62002	3.07213	4.67861	4.33191	4.97442	4.15964	1.82369	2.71689	4.45454	4.54038	7.08424	2.52159
ENSMUSG00000010376	Nedd8	34.7374	0	0	0	20.4434	0	37.3995	20.0369	0	0	45.2194	0	0	0	0
ENSMUSG00000010392	Gosr1	3.79926	2.18145	2.31278	1.96196	3.73569	2.6341	4.64526	3.18055	3.1049	3.01765	2.82313	2.74943	2.60637	2.65896	2.06801
ENSMUSG00000010406	Mrpl52	22.9841	5.46136	11.008	29.132	32.5764	19.7078	35.3624	27.9057	24.1158	31.6299	31.6434	17.0131	24.8202	21.9636	24.5572
ENSMUSG00000010435	Spaca7	0	0	0	0	0	0	0	0	0	0	0	0	0	0	0
ENSMUSG00000010453	Kansl3	14.8614	10.7952	7.98	9.27748	9.59631	11.8929	11.7594	8.10433	8.92093	10.5272	11.9252	10.1321	12.3339	8.14289	9.6752
ENSMUSG00000010461	Eya4	5.70098	3.27516	1.66612	3.25781	5.20767	12.2862	10.4795	5.10689	5.87666	3.07971	5.66286	3.76014	3.99398	5.08651	4.42686
ENSMUSG00000010476	Ebf3	7.5693	12.4594	9.13408	9.21209	5.30502	7.2724	7.02018	4.5437	10.3243	8.17861	8.11157	8.43057	7.35209	7.71343	7.28818
ENSMUSG00000010492	Uckl1os	0	0	0	0	0	0	0	0	0	0	0	0	0	0	0
ENSMUSG00000010505	Myt1	0	0	0	0.416854	0	0.00236516	0	0	0	0.104146	0	0	0	0	0.00110563
ENSMUSG00000010517	Faf1	2.46027	2.70343	2.56161	2.13022	2.79387	1.59792	3.51614	3.41812	2.46835	2.41127	2.90232	2.24075	2.17916	3.19318	2.27956
ENSMUSG00000010529	Gm266	0	0	0	0	0	0	0	0	0	0	0	0	0	0	0
ENSMUSG00000010538	Tsacc	0.52754	1.42819	5.10582	1.50518	1.71691	0.682745	2.46122	0.897979	0.716459	2.39507	4.56875	1.88493	0.998352	1.61315	0.517316
ENSMUSG00000010554	Mettl16	2.49306	4.47021	1.21676	1.88071	1.75869	1.10542	1.33709	1.17488	1.33661	0.963517	0.696206	1.25745	0.896879	0.957969	0.781029
ENSMUSG00000010592	Dazl	0.0245794	0	0	0	0.0138625	0	0	0	0.0464811	0	0	0	0	0.00378935	0
ENSMUSG00000010601	Apol7a	0	0	0	0	0	0	0	0	0.0203374	0	0.0145775	0	0	0.0155331	0
ENSMUSG00000010607	Pigyl	0.74987	0.559711	3.97324	2.71029	3.38405	5.32453	5.67849	4.66495	1.72834	1.85156	2.37386	2.87043	2.27423	4.67739	4.03297
ENSMUSG00000010608	Rbm25	22.948	33.3025	21.4463	25.5795	26.385	25.0195	37.1768	23.1924	28.304	30.9049	24.3658	26.0762	23.4833	20.2257	27.1875
ENSMUSG00000010609	Psen2	2.05666	4.22525	2.70135	2.01232	5.00301	4.66013	7.55971	3.30667	1.61749	3.08329	2.05839	1.53817	2.34224	2.17768	2.16172
ENSMUSG00000010651	Acaa1b	0.231403	0	0	0	0	0.199494	0	0	0	0	0	0	0	0	0
ENSMUSG00000010660	Plcd1	1.05104	0.742659	1.83963	1.21634	2.06473	1.02461	0.118856	0.830841	1.35397	1.54746	3.04144	2.26867	1.80161	1.96567	2.75176
ENSMUSG00000010663	Fads1	6.67835	7.14886	7.02274	11.5891	11.2099	10.3923	5.85375	11.4974	13.3063	10.3401	12.0174	11.0609	10.6035	11.1738	6.78814
ENSMUSG00000010721	Lmbr1	2.35145	0.392886	1.55309	1.3783	0.259101	0.286485	0.398367	0.356436	0.336581	0.688581	1.36397	0.400077	0.49487	0.36392	0.385122
ENSMUSG00000010751	Tnfrsf22	0.0759956	0.279064	2.70057	0.831906	0.894301	3.14347	1.32455	0.87288	0.368407	0.948118	0.755967	2.54454	0.899823	0.918004	0.696453
ENSMUSG00000010755	Cars	4.64619	33.052	5.72706	4.06645	8.30979	5.33062	14.0031	5.56334	4.60364	12.1177	12.6708	8.15102	8.4377	8.3938	8.19405
ENSMUSG00000010760	Phlda2	0	0	0	0	0	0	0	0	0	0	0	0	0	0	0
ENSMUSG00000010796	Asz1	0	0	0	0	0	0	0	0	0	0	0	0	0	0	0
ENSMUSG00000010797	Wnt2	0	0	0	0	0	0	0	0	0	0	0	0	0	0	0
ENSMUSG00000010803	Gabra1	0	0	0	0	0	0	0	0	0	0	0	0.00422391	0	0	0
ENSMUSG00000010825	Grid2ip	0	0	0	0	0.00864786	0	0	0	0	0	0	0	0	0.0198309	0.013359
ENSMUSG00000010830	Kdelr3	0	0	0	0	0	0	0	0	0	0	0	0	0	0	0
ENSMUSG00000010841	1700006E09Rik	0.189635	0	0.189813	0.274545	0.0642469	0	0	0.200896	0	0.0570491	0.104594	0.232921	0.103833	0.216406	0.462782
ENSMUSG00000010911	Apip	0.367441	2.81834	3.44901	2.21641	6.16913	3.75663	1.28331	4.5575	2.2416	3.90551	3.27666	3.31844	6.53603	4.10478	2.45103
ENSMUSG00000010914	Pdhx	6.90643	0.634516	2.95148	3.4748	3.4166	6.92933	8.42217	7.22079	2.19284	8.42631	2.86686	3.72953	2.69304	2.61752	4.6298
ENSMUSG00000010936	Vac14	15.9582	6.21002	9.04591	11.9775	13.3669	11.1662	13.2722	15.5595	10.1967	6.00728	8.9388	11.4226	10.2223	6.43582	8.64246
ENSMUSG00000011008	Mcoln2	0	0.0206712	0	0.0147521	0	0	0.331264	0.0748644	0	0	0	0	0.121551	0.0281256	0
ENSMUSG00000011034	Slc5a1	0	0	0	0	0	0	0	0	0	0	0	0	0	0	0
ENSMUSG00000011052	1700049J03Rik	0	0	0	0	0	0	0	0	0	0	0	0	0	0	0
ENSMUSG00000011096	Akt1s1	0	0	0	0	0	0	0	0	0	0	0	0	0	0	0
ENSMUSG00000011114	Tbrg1	0	0	0	3.50135	0	3.98374	0.853975	0	1.35526	1.13051	2.50859	0	2.39988	0	0
ENSMUSG00000011118	Panx3	0	0	0	0	0	0	0	0.0339003	0	0	0	0	0.00442674	0.00464081	0
ENSMUSG00000011148	Adssl1	0.149648	1.79067	4.65602	0.685811	1.86359	1.40736	0.309672	0.502872	2.06261	1.03842	0.11653	5.95482	1.52248	1.48061	0.620885
ENSMUSG00000011154	Cfap161	0	0	0	0	0	0.136509	0	0	0	0	0	0	0	0	0
ENSMUSG00000011158	Brf1	10.3226	6.49603	13.6434	16.5346	16.4299	15.7688	17.1977	12.8179	19.0299	18.8861	13.1995	15.1412	15.8692	16.0552	17.9843
ENSMUSG00000011171	Vipr2	0	0	0.00476885	0	0	0.0036702	0.011126	0.0195741	0	0.010899	0.00666303	0.00994231	0.00332274	0.00352847	0.00170675
ENSMUSG00000011179	Odc1	0.0501698	0.304651	0.370838	0.948219	2.37605	2.0827	5.63649	1.461	1.90916	0.543231	0.170665	0.806545	0.683283	0.861405	1.01966
ENSMUSG00000011254	Thg1l	1.07316	0.475225	0.89845	1.27311	2.48695	1.55646	6.77119	0.92201	0.181979	1.43282	1.31978	0.527274	1.4743	0.784907	2.21571
ENSMUSG00000011256	Adam19	0	0	0.0013479	0	0.0449469	0	0	0.467942	0	0	0	0	0.0018132	0.0562711	0
ENSMUSG00000011257	Pabpc4	1.68797	1.0542	1.48634	2.42371	3.62203	2.51012	4.23043	0.940009	1.78271	1.0506	2.35359	1.55271	1.34221	2.53756	1.60563
ENSMUSG00000011263	Exoc3l2	0	0	0.0529849	0	0.0460195	0.0914134	0	0	0.0243069	0.00340729	0.0295817	0.0262662	0	0.0146435	0.253913
ENSMUSG00000011267	Zfp296	0	0	1.07157	0	0	0	0	0	0	0.400113	0.743754	0	0	0.522321	0
ENSMUSG00000011305	Plin5	0.0164382	0.189456	0.00488574	0.0481924	0.0644074	0.533015	0.0135695	0.112871	0.126735	0.175976	0.698349	0.222972	0.166576	0.392795	0.182637
ENSMUSG00000011306	Sugp1	1.70609	6.98426	2.84935	3.16633	4.761	3.50727	4.83398	4.09291	4.05311	3.45221	1.85029	4.0622	2.68583	4.65828	4.92999
ENSMUSG00000011349	Dmrtc2	0	0	0	0	0	0	0	0	0	0	0	0	0	0	0
ENSMUSG00000011350	Gm5893	0	0	0	0	0	0	0	0	0	0	0	0	0	0	0
ENSMUSG00000011382	Dhdh	3.89741	4.38903	6.03113	1.64137	3.45817	2.08615	4.44427	3.82492	2.11368	6.73648	2.93894	6.06317	5.80715	6.31772	3.03176
ENSMUSG00000011427	Zfp790	7.32946	4.30105	1.92037	2.08668	1.58192	1.66538	2.51582	4.2623	2.0046	2.95734	1.26902	8.51787	1.92038	1.42779	0.790446
ENSMUSG00000011463	Cpb1	0	0	0	0	0	0	0	0	0	0	0	0	0	0	0
ENSMUSG00000011486	Slc25a41	0	0	0	0	0	0	0	0	0	0	0	0	0.180305	0.0340453	0.00552252
ENSMUSG00000011589	Fsd1	0	0	0	0	0	0	0	0	0.019437	0	0	0	0.217091	0	0.0907136
ENSMUSG00000011632	Pinlyp	0	0	0	0	0	0	0	0	0	0	0	0	0	0	0
ENSMUSG00000011658	Fuz	2.31794	10.4635	0.972732	4.38579	0	0	5.62957	1.9517	5.58531	4.88669	2.1021	0	1.67352	5.59048	5.93203
ENSMUSG00000011751	Sptbn4	0	0	0	0	0	0	0	0	0	0	0.174123	0	0	0	0
ENSMUSG00000011752	Pgam1	0.0596081	0.0926512	0.0795462	0.0738554	0.207325	0.248753	0.197242	0.197977	0.0922468	0.0571443	0.108258	0.0788734	0.100143	0.106478	0.0892052
ENSMUSG00000011831	Evi5	5.95173	3.67269	4.32066	3.61533	2.19196	3.56442	9.16722	4.7945	6.10227	8.68821	4.37855	3.76686	6.53034	5.18961	5.47701
ENSMUSG00000011832	Evi5l	0.768696	1.42273	2.82741	2.51209	3.4417	2.96007	1.6246	4.22383	2.56148	2.19957	0.790643	3.91553	5.58963	4.48875	2.23837
ENSMUSG00000011837	Snapc2	0.364633	3.08631	2.60864	2.03983	2.09869	1.61211	0.859466	1.39014	2.42915	0.732216	1.42062	2.26604	2.67707	1.45827	1.553
ENSMUSG00000011877	Git1	5.26772	2.57873	6.48476	5.9256	5.2819	6.4694	5.4862	8.08778	8.64351	5.5917	8.62139	6.53669	6.37582	6.40994	5.62389
ENSMUSG00000011884	Gltp	13.3286	15.1218	9.39326	14.9419	26.5399	32.2171	20.0517	25.4551	12.5831	18.8489	10.0356	16.7312	22.5723	17.9047	12.6485
ENSMUSG00000011958	Bnip2	30.3119	21.2588	28.5217	33.8164	25.7872	37.9335	41.1877	33.7777	37.6201	35.6659	32.866	16.9818	30.1722	36.9949	29.4911
ENSMUSG00000011960	Ccnt1	12.5184	7.47614	12.8359	10.8081	12.4836	10.0111	11.688	10.0909	8.17637	11.1997	3.14072	12.0702	12.9184	10.6247	9.72206
ENSMUSG00000012017	Scarf2	1.18873	0.555918	0.521953	0.533414	1.17633	1.32876	1.19044	0.96003	1.34234	1.59482	2.3747	1.41121	1.4926	2.13282	1.76324
ENSMUSG00000012042	4930579F01Rik	0	0	0	0	0	0	0	0	0	0	0	0	0	0	0
ENSMUSG00000012076	Brms1l	5.03539	1.65607	3.05043	2.98585	2.70173	2.34689	1.20732	2.94392	2.76253	3.71015	1.62254	1.83031	4.52049	4.04199	1.34433
ENSMUSG00000012114	Med15	5.58862	8.34989	6.52069	8.21834	8.08547	9.50726	5.19701	6.74234	6.16463	6.77521	8.18101	7.41323	5.2826	7.01915	8.269
ENSMUSG00000012117	Dhdds	3.52743	2.71649	3.15309	5.11239	3.74982	3.18965	4.25862	2.97801	1.28666	3.72669	2.96742	2.67631	3.07596	3.34614	3.33143
ENSMUSG00000012123	Crybg2	0	0	0	0	0	0	0	0	0	0.672418	0	0	0	0	0
ENSMUSG00000012126	Ubxn11	0	9.24231	0	0	0	0	0	0	0	0	0	0	0	0	0
ENSMUSG00000012187	Mogat1	0	0	0	0	0	0	0	0	0	0	0	0	0	0	0
ENSMUSG00000012211	Tex22	0	0.0171905	0.0694962	0.188446	0.195499	0.0492463	0.0852945	0	0.0620698	0.136641	0	0	0.0554213	0.180969	0.0206619
ENSMUSG00000012282	Wnt8a	0	0	0	0	0	0	0	0	0	0	0	0	0	0	0
ENSMUSG00000012296	Tjap1	4.64525	16.8702	5.08298	3.03085	3.76814	2.00901	1.15397	2.15882	1.56285	3.61244	4.98561	2.77685	4.6072	3.55298	2.5769
ENSMUSG00000012350	Ehf	0	0.888051	0	0.0509011	0	0	0	0	0	0.0387352	0	0	0	0.00251958	0.00146708
ENSMUSG00000012396	Nanog	0	0.00875058	0.00394228	0.00627674	0	0.00627144	0	0	0.00794762	0.0193007	0.0115683	0	0	0.00600638	0.00292559
ENSMUSG00000012405	Rpl15	1.87592	0	2.92223	1.32105	3.49235	5.31622	5.01489	4.42742	0.691785	1.97893	0	0	1.40014	1.81055	2.22261
ENSMUSG00000012422	Tmem167	3.91565	3.54607	2.30849	0.996709	2.39742	1.79027	2.45209	1.63044	1.30327	1.74095	0.9726	1.77607	3.03234	1.42702	1.40359
ENSMUSG00000012428	Steap4	0	0	0	0	0	0	0	0	0	0	0	0	0	0	0
ENSMUSG00000012429	Mplkip	3.88891	3.09722	3.38691	3.34463	2.89958	2.75619	3.43806	2.52677	5.039	2.91085	3.21996	3.6045	3.38894	3.81899	3.35871
ENSMUSG00000012443	Kif11	0.0619402	0.00352398	0.0089665	0.0944203	2.72038	5.55252	1.19641	12.8916	0.181302	0.0332336	0.00450163	0.0542081	0.637149	3.83776	0.766177
ENSMUSG00000012483	Rpa3	1.31531	1.36437	2.91805	2.33421	1.68481	1.09156	1.15928	2.14416	1.4342	1.32217	2.23537	0.668284	2.20265	1.86242	0.72484
ENSMUSG00000012519	Mlkl	0.169579	0	0	0	0.302904	0.682495	0.0613499	0.569662	0.0557261	0	0	0.207092	0.0202558	0.126938	0.514696
ENSMUSG00000012520	Phox2b	0	0	0	0	0	0	0	0	0	0	0	0	0.173415	0	0
ENSMUSG00000012535	Tnpo3	9.15206	0	6.07495	6.28831	5.87908	5.15615	13.8678	5.60083	6.44377	6.23472	0	4.08246	4.93793	4.95801	0
ENSMUSG00000012609	Ttll5	32.0951	4.889	3.22662	3.30672	3.41795	5.59408	10.0393	8.33971	1.64936	7.09335	2.77631	8.0999	3.36425	5.22704	2.21834
ENSMUSG00000012640	Zfp715	14.1995	5.36461	8.00886	6.78518	7.52018	6.15072	10.1935	6.33331	8.57641	17.0821	8.16274	7.89598	6.97828	7.15967	6.02537
ENSMUSG00000012705	Retn	0	0	0	0	0.0178975	0	0	0	0	0	0	0	0	0	0
ENSMUSG00000012777	Acp4	0	0	0	0	0	0	0	0	0	0	0	0	0	0	0
ENSMUSG00000012819	Cdh23	5.72067	3.12042	3.03976	5.79836	3.09553	2.9877	4.20694	2.48625	3.49001	5.28914	3.79753	7.53461	3.02795	5.4288	5.81216
ENSMUSG00000012848	Rps5	30.9999	19.9862	42.5569	48.3682	133.58	94.5041	73.7702	114.011	42.6189	48.8135	37.6516	54.3171	57.6187	80.0055	93.7377
ENSMUSG00000012889	Podnl1	0.191441	0	0.00322519	1.25573	0.39425	0.498931	0.297542	0.445213	0.14214	0.299128	0.120008	0.0542616	0.0123902	0.144347	0.113585
ENSMUSG00000013033	Adgrl1	1.47821	0.970895	1.95329	0.654999	2.06184	1.21561	1.39417	1.25948	2.70493	1.167	9.25744	1.28957	1.40433	1.15241	0.954303
ENSMUSG00000013076	Amotl1	0.585828	0.435301	0.255538	0.605908	0.95597	0.54771	0.902517	0.520566	1.94877	1.47931	0.26331	0.978427	1.23458	1.19491	0.846377
ENSMUSG00000013083	2200002J24Rik	0	0	0	0	0	0	0	0	0	0	0	0	0	0	0
ENSMUSG00000013089	Etv5	29.429	21.9711	23.6739	39.7236	24.0286	26.2624	23.2991	21.1466	33.6663	35.9211	33.3485	41.6649	29.4745	25.689	18.0582
ENSMUSG00000013091	Tmem190	0	6.36574	0	0.683812	0.956231	0	0	0.0902145	0	0	0	0.132528	0	0.036308	0.0117155
ENSMUSG00000013150	Gfod2	0.106034	0.230838	0.426256	0.362253	0.0890494	0.396902	0.0456293	0.0539632	0.0226382	0.136259	0.185358	0.195448	0.140541	0.0934463	0.146143
ENSMUSG00000013155	Enkd1	0.22525	0.00552477	0.396129	1.28956	0.499407	1.11752	0.0778533	0.271757	0.329809	0.464763	0.0109662	0.166806	0.490965	0.756771	0.187993
ENSMUSG00000013158	4933405L10Rik	0	0	0	0	0	0	0	0	0	0	0	0	0	0	0
ENSMUSG00000013160	Atp6v0d1	14.6088	18.3057	14.7789	11.4102	27.3005	19.0127	27.1728	23.5637	14.3041	10.8124	17.2994	12.2306	12.7755	16.5486	15.9689
ENSMUSG00000013236	Ptprs	9.0918	17.1111	15.791	9.0121	11.6874	8.67773	19.3858	5.01068	11.5827	20.0535	33.1788	25.131	13.3571	10.538	25.1285
ENSMUSG00000013275	Slc41a1	2.80036	1.73427	7.26541	8.11357	3.69336	3.55937	16.7859	1.91448	4.31841	1.5489	10.8229	2.29639	3.26472	6.67889	8.5951
ENSMUSG00000013338	Fer1l4	0	0	0	0	0	0.0129295	0.198079	0	0	0	0	0	0	0	0
ENSMUSG00000013353	4931406B18Rik	0.00697246	0	0.00395533	0	0.287859	0	0	0	0.00797891	0	0.00278486	0	0.026608	0	0.00295879
ENSMUSG00000013367	Iglon5	0	0	0.150405	0.0156572	0.377844	0	0.015056	0.00957342	0.00646828	0.184102	0	0.103302	0.00919503	0.00506813	0.493501
ENSMUSG00000013415	Igf2bp1	0	0	0.00100564	0.0119312	0.00179675	0.00152529	0.0015358	0	0	0	0	0.0020819	0.00139501	0	0.00285124
ENSMUSG00000013418	B4galnt2	1.67813	0.0308862	0.229914	0.536458	0.101715	0.36706	0.103119	0.383076	0.392349	0.0789075	0	0.176248	1.00396	0.327334	0.0623149
ENSMUSG00000013419	Zfp651	0	0	0	0	0	0	0	0	0	0	0	0	0	0	0
ENSMUSG00000013465	Nelfb	3.54482	6.09262	5.41571	6.22075	5.08142	3.23344	6.88065	2.9369	4.75256	8.49777	4.40859	5.6145	11.3277	4.32627	4.56492
ENSMUSG00000013483	Card14	0	0	0	0	0	0	0	0	0	0	0	0	0	0	0
ENSMUSG00000013495	Tmem175	6.02985	8.45194	8.2575	12.6177	6.05026	9.92549	3.8203	9.2428	15.9779	9.69579	12.6759	12.8216	12.1349	15.6239	12.6744
ENSMUSG00000013523	Bcas1	0	0	0.0269722	0.345542	0.193707	2.18878	0.55089	0.0803892	0.332198	1.11376	0	0.0876414	0.309872	0.452676	0.124989
ENSMUSG00000013539	Tango2	6.53689	5.71703	13.4092	11.0805	4.61237	4.108	4.22176	4.20376	3.81711	8.06051	9.1756	4.74263	7.89005	9.30032	5.04742
ENSMUSG00000013562	4833413E03Rik	0	0.270059	0.0955719	0.0483304	0.487575	0.071675	0.340934	0.58583	0.121564	0.716994	0.0221734	1.14991	0.484667	0.280581	1.15191
ENSMUSG00000013584	Aldh1a2	0	0	0	0	0	0	0	0	0	0	0	0	0	0	0
ENSMUSG00000013593	Ndufs2	19.7458	7.48558	15.4888	15.9428	25.9919	18.1418	31.7607	16.3904	10.7811	23.9685	21.7827	22.4191	20.387	16.6687	18.7078
ENSMUSG00000013611	Snx31	0	0	0.0948709	0	0	0.00535113	0	0	0.0204344	0.00543212	0.0351843	0.0590711	0	0.0724634	0
ENSMUSG00000013622	Atraid	22.566	53.1678	50.3556	40.3406	34.1602	36.337	35.8218	34.4257	36.0104	29.7134	45.6888	33.8566	35.1617	39.4486	35.5227
ENSMUSG00000013629	Cad	8.99606	3.68689	0.942739	5.99685	2.24238	1.99957	14.4162	4.60814	1.36847	0.746275	0.644035	0.889815	6.21149	3.27959	0.97641
ENSMUSG00000013643	Lypd8	0	0	0	0	0	0	0	0	0	0	0	0	0	0	0
ENSMUSG00000013646	Sh3bp5l	1.1723	0.962586	0.938021	0.791287	1.12302	0.535151	0.555163	0.703951	0.733512	2.01922	1.27151	0.766003	1.89829	1.2769	1.35091
ENSMUSG00000013653	1810065E05Rik	0	0	0	0	0	0	0	0	0	0	0	0	0	0	0
ENSMUSG00000013662	Atad1	8.13591	12.1166	14.7963	10.5698	14.1995	15.9617	18.0211	13.2949	17.4948	10.11	12.6258	10.6997	10.8486	10.171	8.9047
ENSMUSG00000013663	Pten	23.2632	35.6185	28.6954	14.5524	11.5142	11.077	19.4541	12.3458	13.7714	12.1337	11.5341	14.3444	13.2192	11.3359	11.9029
ENSMUSG00000013668	4933402N03Rik	0	0	0	0	0	0	0	0	0	0	0	0	0	0	0
ENSMUSG00000013698	Pea15a	16.7858	11.489	10.8297	14.5488	35.1881	43.6011	30.0819	26.0401	43.1326	22.8031	21.8122	12.4999	20.8963	25.4817	19.197
ENSMUSG00000013701	Timm23	1.65206	1.24689	0.788097	2.37877	1.75603	0.790453	0.893662	1.23579	0.906504	1.45171	0.282173	0.303608	1.15867	1.80453	2.24555
ENSMUSG00000013707	Tnfaip8l2	33.2804	21.4766	31.9531	29.8937	38.1158	31.2306	22.6331	28.1045	47.6501	42.6279	35.5522	33.2503	49.1609	33.6297	36.6523
ENSMUSG00000013736	Trnt1	0	10.2897	6.42629	3.13399	3.95633	4.58399	10.7588	5.24523	4.13204	3.24055	2.4518	2.64292	2.85635	4.50217	2.05652
ENSMUSG00000013766	Ly6g6e	0.028519	0	0	0.249346	1.14964	0	0	0.832479	0	0	0.0983421	1.9495	0	0	0
ENSMUSG00000013787	Ehmt2	20.6647	12.6451	9.03034	8.40864	11.6456	13.7172	9.85581	10.0129	9.41091	9.6711	11.0474	10.4944	15.7421	14.3379	13.628
ENSMUSG00000013822	Elof1	0.457302	2.61904	0.892394	4.40188	4.84506	3.35063	1.90546	2.10724	2.13647	3.09215	1.03916	3.87456	2.98424	2.64346	1.88801
ENSMUSG00000013833	Med16	0.616269	1.31965	2.85736	1.89762	2.31268	2.06383	2.03479	3.92168	3.66851	12.1387	6.30971	5.85976	5.68357	2.59959	3.71624
ENSMUSG00000013846	St3gal1	0.114233	2.03445	1.57143	1.63588	3.24135	1.91967	1.57545	3.47039	1.6983	1.19998	1.64207	1.08329	0.671747	2.01176	1.53124
ENSMUSG00000013858	Tmem259	6.51854	10.6579	10.9128	11.081	12.5571	13.701	21.3797	11.5337	7.09474	15.2821	13.2707	10.6638	12.1135	15.0956	14.5506
ENSMUSG00000013878	Rnf170	1.71941	2.55626	2.93746	1.73932	2.71198	2.02215	7.35804	2.27517	1.46268	2.07973	1.35579	4.65422	3.67114	3.6566	2.34898
ENSMUSG00000013921	Clip3	0	0.392982	0	0.11791	0.0183523	1.096	0.0889879	0.163141	0.161818	0.410198	0	0.214398	0.069316	0.0943054	0.0363681
ENSMUSG00000013928	Thap8	0.348057	1.44941	0	0	0	0	0	0	0	0	0	0	0	0	0
ENSMUSG00000013936	Myl2	5.75875	3.56309	6.01915	2.40773	1.50136	2.10665	5.51549	1.43343	1.09988	7.14994	1.07258	3.01414	2.39757	0.580317	1.91427
ENSMUSG00000013973	Dedd	3.39136	12.0234	8.55004	6.12205	5.67915	3.15396	12.7034	5.91499	4.23878	5.97029	3.62133	6.24848	7.87053	2.33637	8.91811
ENSMUSG00000013974	Mcemp1	0	0	0	0	0.184526	0.0910042	0.0859497	0.0144951	0	0	0	0.0909422	0	0.00802718	0.0696905
ENSMUSG00000013997	Nit1	3.1818	5.59559	8.18632	3.80874	4.69171	5.20477	6.40612	1.76659	7.12012	3.43457	4.56878	6.41577	3.12877	6.1664	2.76438
ENSMUSG00000014030	Pax5	0	0	0	0	0	0	0	0	0	0	0	0	0	0	0
ENSMUSG00000014039	Prdm15	9.78079	2.34639	3.17331	1.92625	4.3524	8.34966	1.5925	2.17586	4.11742	2.51175	10.3182	2.43943	6.51226	1.95785	1.46149
ENSMUSG00000014074	Rnf168	2.18614	0.866366	1.93864	2.67009	2.85132	4.49479	2.83807	3.67972	3.48809	2.49859	0.879367	1.71353	3.5932	2.84845	2.1075
ENSMUSG00000014075	Tctex1d2	3.94897	1.48633	4.23582	1.59887	4.19121	2.4963	1.14631	2.58346	3.09358	3.8636	6.6111	2.77391	5.31411	4.20629	3.70844
ENSMUSG00000014077	Chp1	1.12271	2.53251	2.74818	2.30756	4.90833	2.42759	4.28426	3.01286	2.23765	2.00478	4.76497	2.11251	2.31948	4.1363	2.25648
ENSMUSG00000014104	Sval2	0	0	0	0	0	0	0	0	0	0	0	0	0	0	0
ENSMUSG00000014158	Trpv4	0.666155	2.99121	0.645351	0.662185	4.35039	1.05011	1.17976	0.958583	0.732188	0.531047	0.511741	1.73936	2.18292	1.28522	2.4921
ENSMUSG00000014164	Klhl3	0.680652	0.31707	1.21302	0.219004	0.471464	0.115998	0.035251	0.199598	0.300699	0.769123	1.01307	0.413451	0.900398	0.594994	0.574597
ENSMUSG00000014177	Tvp23b	3.31112	2.42348	6.3395	2.89449	5.15287	4.37492	4.46711	3.76749	2.93596	5.17007	4.8051	2.1291	4.6924	3.47791	3.10845
ENSMUSG00000014195	Dnajc7	51.7908	77.1576	53.9566	41.9051	24.8711	9.39396	72.991	36.8051	51.2634	61.7951	52.7708	49.8265	57.5279	50.1558	44.6986
ENSMUSG00000014198	Zfp385c	0	0	0	0	0	0	0	0	0	0	0	0	0	0	0
ENSMUSG00000014226	Cacybp	2.62237	1.36511	6.53181	2.42653	4.9753	9.34131	3.39228	2.2273	2.18811	3.25587	4.06066	2.73468	2.57242	1.72941	1.51586
ENSMUSG00000014232	Cluap1	0	0	0	6.39172	16.3847	0	0	6.59672	0	0	0	0	0	0	0
ENSMUSG00000014243	Zswim7	0.886184	0	1.46163	0.431803	0.709403	0.465095	0	0.422299	0.756243	0.112712	0.0365134	0.623855	0.74483	0.509344	0.356381
ENSMUSG00000014245	Pigl	10.3739	0	0	0	0	13.365	0	0	0	0	0	0	0	0	0
ENSMUSG00000014294	Ndufa2	0	5.00615	8.78433	5.30436	10.4835	10.0025	8.15118	12.2635	10.1548	11.093	8.30441	7.93792	6.08046	8.68456	5.61643
ENSMUSG00000014301	Pam16	0.32449	0	0	0.0698749	0.588605	0.506949	0	1.18382	0.447562	0.39286	1.65087	0	0	0	0.477133
ENSMUSG00000014303	Glis2	0.219412	0.715842	0.288718	0.287113	0.552384	0.459745	1.16977	0.698912	1.13455	0.693245	0.236943	4.26096	1.55469	1.7911	1.07017
ENSMUSG00000014313	Cox6c	0	0	0	0	0	0	0	0	0	0	0	0	0	0	0
ENSMUSG00000014329	Bicc1	0	0	0	0	0	0	0	0	0	0	0	0.00314102	0	0	0.00187834
ENSMUSG00000014349	Ube2z	5.39176	3.82643	7.68973	4.8325	6.074	5.8525	4.44036	5.74252	5.98351	5.18519	3.71223	5.56708	5.28477	4.17588	3.40239
ENSMUSG00000014351	Gip	0	0	0	0	0	0	0	0	0	0.253947	0	0.0295059	0	0	0.0104506
ENSMUSG00000014353	Tmem87b	6.76618	11.7831	16.1498	8.26241	11.3478	8.26031	12.468	9.01504	7.21715	12.2481	7.88812	10.1032	8.33506	7.97257	7.61457
ENSMUSG00000014355	Anapc1	9.77917	17.4665	8.63989	9.13079	8.94608	8.99532	8.52095	10.669	8.58215	8.79438	10.0683	9.25001	11.0543	8.08764	8.03469
ENSMUSG00000014361	Mertk	88.5563	79.5016	96.8604	76.8498	60.4206	52.8317	54.442	50.7365	88.144	77.6653	89.4523	76.7734	75.0755	65.4476	64.8274
ENSMUSG00000014402	Tsg101	7.25117	4.04217	5.45741	4.93148	6.9181	8.64131	12.6171	5.35295	5.34113	6.40694	11.7216	5.06257	3.88229	4.93721	5.02488
ENSMUSG00000014418	Hps5	11.6593	5.84874	9.46125	4.58133	5.92559	11.0123	12.3756	4.31241	6.11796	4.15053	1.89985	8.68104	12.0878	5.68261	7.95053
ENSMUSG00000014426	Map3k4	2.73323	2.66425	3.09496	2.56037	2.83314	2.65647	1.38209	2.90297	2.94325	2.8334	3.84436	2.86968	3.21175	2.82994	2.18979
ENSMUSG00000014453	Blk	0	0	0	0	0	0	0	0	0	0.00533064	0	0	0	0	0
ENSMUSG00000014496	Ankrd28	0.489238	0.608796	0.662012	1.02503	0.980347	2.44504	2.73983	1.11299	1.53122	1.49604	2.52899	0.7202	0.860596	1.6372	1.34628
ENSMUSG00000014498	Ankrd52	12.5947	6.92108	8.96416	10.962	15.6932	10.8796	13.5148	10.8953	8.74317	10.4988	12.6499	10.8428	11.4237	12.7379	9.76698
ENSMUSG00000014503	Pkd2l2	0	0	0	0	0	0	0	0	0	0	0	0	0	0	0
ENSMUSG00000014504	Srp19	5.04869	12.1319	6.13494	4.40526	5.56337	6.74033	7.32225	5.63028	6.09073	5.05863	4.26984	7.14015	5.22921	6.15213	3.61536
ENSMUSG00000014529	Tmbim7	0	0	0	0	0	0	0	0	0	0	0	0	0	0	0
ENSMUSG00000014542	Clec4f	0	0	0	0	0	0	0	0	0	0	0	0	0	0	0
ENSMUSG00000014543	Klra17	0	0	0	0	0	0	0	0	0	0	0	0	0	0.00973998	0
ENSMUSG00000014547	Wdfy2	13.6311	6.32894	11.3655	9.68096	8.94719	8.03946	8.78838	9.9133	12.2833	11.9967	10.3006	13.5155	10.2013	9.42764	7.47503
ENSMUSG00000014550	Rbsn	1.26322	6.53193	1.7645	2.85035	1.9989	1.8285	5.61019	2.14644	3.66124	3.7917	3.65906	1.82786	1.76596	3.23838	2.08629
ENSMUSG00000014551	Mrps25	5.60201	0	4.30754	0	0	1.88083	3.19388	2.13581	0	4.25691	0	4.32011	2.47295	2.6137	2.42729
ENSMUSG00000014554	Dguok	1.63453	2.70214	5.83517	9.35395	6.44565	6.3397	6.93925	4.80276	6.09757	11.4446	7.84565	9.7804	9.80633	7.48838	7.48856
ENSMUSG00000014592	Camta1	14.8884	16.8031	4.64561	9.22269	14.9143	7.52805	12.8274	13.5039	11.2126	4.23388	3.44121	9.12234	13.091	10.3373	17.4315
ENSMUSG00000014599	Csf1	3.34948	9.95291	1.84052	3.69292	15.7529	10.9505	10.9216	11.716	2.48798	1.96967	4.15316	4.31393	5.11156	3.85341	8.87034
ENSMUSG00000014601	Strip1	4.42147	2.96707	3.03122	2.96049	2.06026	3.37533	5.78575	2.9256	3.92739	3.76893	5.5374	3.86647	5.87193	2.45887	2.90087
ENSMUSG00000014602	Kif1a	0.0256724	0	0.0600087	0.0025432	1.30428	0.345503	0.538039	0.230699	0.993716	0.918638	0.025378	0.0677068	0.0868344	0.219094	0.0623337
ENSMUSG00000014603	Alx3	0	0	0	0	0	0	0	0	0	0	0	0	0	0	0
ENSMUSG00000014606	Slc25a11	7.45226	7.21889	10.4011	12.6668	11.0036	16.744	12.2768	15.747	11.8854	10.8053	14.1412	16.0378	10.3073	10.3743	10.1786
ENSMUSG00000014609	Chrne	0.259771	0	0.152416	0	0.0722178	0.0503414	0.0592497	0.133627	0	0.358063	0	0.627763	0	0	0.182461
ENSMUSG00000014633	Cmc2	0.26901	0.0581576	1.99012	0.0780647	3.1795	0.737435	1.02119	5.81648	0.726997	0.482983	0.193957	0.164434	0.723704	2.28411	1.74515
ENSMUSG00000014668	Chfr	4.1988	17.3753	5.61741	4.27022	6.3588	10.6149	5.13567	8.06017	4.85352	5.12812	6.433	5.85386	4.97562	4.20639	5.04004
ENSMUSG00000014686	Ceacam16	0	0	0	0	0.0392442	0	0	0	0	0	0	0	0	0	0
ENSMUSG00000014704	Hoxa2	0	0	0	0	0	0	0	0	0	0	0	0	0	0	0
ENSMUSG00000014725	Adam28	0	0.542485	0	0.00386751	0	0	0.00405203	0	0	0	0	0	0	0.0349212	0
ENSMUSG00000014747	Ankrd53	0.514611	0.0913258	0.0735356	0.194761	0.114452	0	0.134889	0.158737	0.0189851	0.0828637	0	0.392726	0.460634	0.2836	0.350743
ENSMUSG00000014748	Tex261	8.87295	10.1155	6.27915	8.21278	10.5306	9.96021	11.0551	12.3075	8.36999	9.30773	8.00724	7.35313	8.6612	8.84925	9.23457
ENSMUSG00000014763	Fam120b	2.86003	3.82133	3.69801	5.53415	5.27428	3.15409	5.35905	3.56967	5.2347	4.60011	3.7968	4.45265	4.70636	5.65292	4.92446
ENSMUSG00000014767	Tbp	11.9538	22.2478	40.1888	10.2525	2.7846	16.8236	7.46363	11.5626	3.16784	23.0812	3.44912	16.0116	14.6235	12.3754	10.267
ENSMUSG00000014769	Psmb1	12.1532	9.94346	7.43981	4.98691	11.2039	10.4337	7.07589	8.00265	8.00508	4.74321	5.74066	7.78443	6.78784	7.72162	6.53605
ENSMUSG00000014771	Pdcd2	0	0	0	0	0	0	0	0	0	0	0	0	0	0	0
ENSMUSG00000014773	Dll1	0	0	0	0	0	0	0	0	0	0	1.07839	0	0	0.07867	0.0283559
ENSMUSG00000014776	Nol3	0.0429509	0	0	0	0.201033	0	0.301323	0	0.449936	0	0.414492	0	0.292266	0	0.247042
ENSMUSG00000014778	Fhod1	5.35633	6.67062	9.30174	7.58264	8.48494	5.58621	14.8579	9.23969	17.9166	30.6579	9.31061	13.1079	11.7905	9.02736	9.27769
ENSMUSG00000014782	Plekhg4	0	0	0.0223873	0	0	0	0.0726478	0.104588	0	0	0	0	0	0	0.0824677
ENSMUSG00000014786	Slc9a5	0.0244032	0	0.0577715	0.00410702	0.579679	0.570244	0.0597951	1.50438	0.442404	0.0894846	0.0369882	0.0911468	0.324727	0.497363	0.193876
ENSMUSG00000014791	Elmo3	1.03449	0.468868	1.4414	1.23609	1.96463	2.66141	2.0254	1.4062	1.04431	1.0138	1.34381	2.54147	2.22016	1.31227	2.11304
ENSMUSG00000014813	Stc1	0	0	0	0	0	0	0	0	0	0.00603731	0	0	0	0	0
ENSMUSG00000014837	4931428F04Rik	0	0.394861	0.383011	0.143602	0.135164	0.191208	0	0.257224	0.698383	0.520007	0.375337	0.264272	0.0812822	0.570004	0.181402
ENSMUSG00000014846	Tppp3	0.0321863	0	0.0396269	0.280514	0.477136	0.4451	0	0.54261	0.0822763	0.113254	0	0.0130875	1.10291	0.30024	0
ENSMUSG00000014850	Msh3	0.746961	6.50339	1.3812	1.85205	1.50498	1.97993	1.37517	1.20183	2.27366	0.728014	0.415386	3.23406	2.19431	2.09751	1.40998
ENSMUSG00000014852	Adamts13	0	0	0	0	0	0	0	0	0	0	0	0	0	0	0.023292
ENSMUSG00000014856	Tmem208	16.7432	8.5372	9.08063	18.1443	9.40902	8.49025	10.653	0	0	0	8.74498	0	0	0	0
ENSMUSG00000014859	E2f4	12.882	11.3221	20.8661	12.2456	18.3201	22.6462	31.5688	20.5923	9.7227	19.3372	14.1659	13.8483	17.9771	15.643	15.1558
ENSMUSG00000014867	Surf4	14.1709	18.8337	25.7085	17.839	33.2295	24.9346	38.7845	27.6162	17.8207	18.9347	20.1469	21.6571	16.4936	20.7999	22.4306
ENSMUSG00000014873	Surf2	4.74475	0	0	0	0	0	0	0	0	0	0	0	3.45451	0	0
ENSMUSG00000014905	Dnajb9	8.72046	5.32913	9.62307	8.16704	5.65614	4.66638	5.84596	5.45142	3.47384	4.0368	4.16708	4.30236	5.07165	3.66848	4.26194
ENSMUSG00000014907	Naf1	0.235916	0.772476	1.0136	0.149705	0.624155	0.380789	1.0266	0.218658	0.806486	0.468295	0.34086	1.19355	0.925465	0.238959	0.267075
ENSMUSG00000014932	Yes1	6.06575	3.93504	5.2037	4.75136	3.43652	5.00195	3.12245	3.82506	4.45606	4.56745	5.36204	5.82093	3.69814	3.4324	3.24702
ENSMUSG00000014956	Ppp1cb	24.4064	9.09756	22.7683	14.3361	22.1615	19.1303	25.663	22.1249	19.2099	18.985	19.8703	18.7133	15.9708	18.6269	13.3167
ENSMUSG00000014959	Gorasp2	10.0768	8.48991	9.00555	11.778	11.6144	20.5764	10.3297	8.16634	10.9238	8.11662	10.5371	15.8155	11.1671	5.38284	6.91555
ENSMUSG00000014980	Tsen15	3.14691	1.86608	4.09972	2.01993	1.97222	3.33233	2.74441	1.5582	1.48492	2.17247	4.7677	2.25656	2.71939	3.22783	1.66563
ENSMUSG00000015001	Oc90	0	0.0996228	0.100734	0.114966	0.165639	0.0285679	0	0.0353836	0.0593247	0.232328	0	0	0.140491	0.285511	0.093335
ENSMUSG00000015002	Efr3a	5.80215	7.92613	6.90079	4.85687	5.74792	6.36423	8.23807	6.42646	5.35574	5.32772	4.84009	4.64089	5.67261	5.8063	6.17476
ENSMUSG00000015023	Ddx19a	1.4501	6.10235	3.01233	1.96327	3.09921	2.60736	2.0753	2.78849	3.33822	4.62984	3.46661	4.28891	2.34598	1.83617	1.82036
ENSMUSG00000015053	Gata2	0	0	0.0124008	0.0357599	0	0	0	0.107452	0	0	0	0	0.00398059	0	0.262566
ENSMUSG00000015083	C8g	11.7028	0	0	0.179314	0.615955	0	5.79246	0.0949282	0	0.148834	0	0.57994	1.00689	0.401782	0.485729
ENSMUSG00000015085	Entpd2	0	0	0	0	0	0	0	0	0	0	0	0	0.0218242	0	0
ENSMUSG00000015087	Rabl6	13.7866	5.3067	4.23677	6.91747	7.8179	4.93844	7.58017	5.04393	4.5823	6.86755	2.5438	8.17428	6.81463	5.89166	5.12382
ENSMUSG00000015090	Ptgds	0.340601	0	0	0.0728326	0.0794112	0	0	0	0	0.124155	0.279639	0	1.71537	0.0444213	0
ENSMUSG00000015092	Edf1	12.1775	13.909	10.692	16.6174	22.1615	19.3659	10.5935	23.7723	18.4818	13.0973	10.3231	13.6756	9.77275	14.369	12.563
ENSMUSG00000015093	Clic3	0	0.15938	0	0.679655	0.711314	0.181821	0	0.581714	1.79592	0.152106	0.769992	0.134762	0.964613	1.08569	1.35941
ENSMUSG00000015094	Npdc1	0	0	0	0	0	0	0	0	0	0	0	0	0	0.0592643	0.214055
ENSMUSG00000015095	Fbxw5	7.21622	10.7942	10.3327	8.71068	13.9471	7.61331	12.7333	12.3168	6.35969	9.85324	15.5783	4.93814	8.43661	8.3904	8.71086
ENSMUSG00000015112	Slc25a13	4.69892	0.1893	0.55295	0.603266	1.05437	0.898116	0.560715	1.0727	1.3898	0.222273	0.244882	0.871809	0.670721	0.434167	0.33666
ENSMUSG00000015120	Ube2i	8.53865	12.0007	11.0023	13.5669	12.6348	14.8772	11.0672	10.0858	15.747	24.3016	16.2474	15.3477	18.1863	15.3911	14.0219
ENSMUSG00000015126	Tsr3	0.612184	9.20657	1.1511	4.14499	1.81358	3.11127	2.56934	0.860926	2.86663	2.65703	2.32445	1.60278	1.87131	0.918501	1.54478
ENSMUSG00000015127	Unkl	8.13905	2.28039	4.5737	4.88798	0.910336	0	0.912398	5.80307	6.18673	5.39469	8.65253	9.31112	5.28516	0.810369	8.57682
ENSMUSG00000015133	Lrrk1	4.92625	9.19523	11.6562	8.27385	12.0619	10.805	4.29205	10.7778	5.84798	11.9563	6.7042	14.2519	10.1392	15.1827	10.8034
ENSMUSG00000015134	Aldh1a3	2.58787	0.146412	0.00976769	0.10688	0	0.293924	0.0411287	0.0327752	0.092027	0.110242	0.356376	0.164747	0.316352	0.270871	0.0566302
ENSMUSG00000015143	Actn1	0.753652	0.883504	1.07312	0.942052	2.02356	0.91561	0.532004	1.35908	1.45777	1.5228	9.15821	1.83919	1.87342	1.54094	0.437864
ENSMUSG00000015149	Sirt2	36.7196	8.45813	24.9571	11.7848	44.8989	25.3046	23.965	23.1682	29.7654	31.0278	9.35568	23.7593	18.6053	24.3524	38.5412
ENSMUSG00000015165	Hnrnpl	42.774	34.69	32.6053	40.0995	47.6944	49.0261	31.7736	32.1903	50.2004	53.8497	41.453	41.3789	32.9016	47.3711	43.5495
ENSMUSG00000015176	Nolc1	1.04216	1.22684	2.1604	1.35746	6.14227	5.95637	7.73662	3.87381	3.04878	1.44769	3.2124	1.4175	1.63705	2.0343	2.44601
ENSMUSG00000015189	Casd1	4.25893	9.45153	23.63	15.8034	6.68453	15.2431	8.03361	5.65699	12.9525	5.7877	7.74872	11.6652	7.31142	6.71852	6.98752
ENSMUSG00000015202	Cnksr3	0.419036	0.704138	0.354711	0.277549	1.02642	0.60135	1.27789	0.3071	0.163309	1.0474	0.910423	0.557258	1.07161	0.461723	1.31092
ENSMUSG00000015214	Mtmr1	0.544737	3.94745	2.76613	2.26128	1.94375	1.93605	1.25267	1.81656	1.64042	1.40533	2.1995	3.71629	2.32526	2.36038	1.70633
ENSMUSG00000015217	Hmgb3	0	0	0	0	0.161422	0.0469735	0	0.246201	0.0200553	0.00826633	0.0454637	0	0	0.128931	0.0513051
ENSMUSG00000015222	Map2	0.437307	0.282186	0.0770099	0.100358	0.241339	0.0386816	0.424404	0.247437	1.74287	0.121805	0.444105	1.57447	0.300866	0.214823	0.229452
ENSMUSG00000015224	Cyp2j9	0	0	0.00386334	0	0	0	0.104216	0.198574	0	0	0	0.0202939	0	0.0631771	0
ENSMUSG00000015242	Nipsnap3a	0	0	0	0	0	0	0	0	0	0	0	0	0	0	0
ENSMUSG00000015243	Abca1	11.3164	16.5826	13.7165	12.6148	19.6222	18.0607	15.8676	12.2457	13.4936	11.715	11.5842	11.3057	13.5959	14.5986	15.5026
ENSMUSG00000015247	Nipsnap3b	1.27015	1.84057	2.46889	2.77072	2.96146	4.76832	8.90607	3.90118	3.66253	1.56032	5.59151	2.96487	2.3	2.26269	4.31938
ENSMUSG00000015289	Lage3	1.25724	0.797124	0.900494	2.74424	6.00433	5.44055	1.74303	5.18652	3.87777	2.07593	2.16496	1.74248	3.23625	4.87572	4.51336
ENSMUSG00000015290	Ubl4a	7.36329	5.02306	4.46504	3.11213	4.71306	2.75913	8.72812	4.22352	5.062	4.04554	4.19874	2.88841	5.00932	4.19594	3.02414
ENSMUSG00000015291	Gdi1	9.34129	14.4515	9.17983	14.6293	16.6838	9.80376	16.7373	9.09372	15.529	16.363	11.3393	14.2289	11.148	13.4744	12.0327
ENSMUSG00000015305	Sash1	0.19464	0.15732	0.101368	0.149349	0.45553	0.696074	0.132147	0.266588	0.0566297	0.164583	0.171358	0.292138	0.172219	0.214737	0.16045
ENSMUSG00000015312	Gadd45b	0	0	0	0.065324	0.861379	1.59304	4.68682	0.442206	0	1.33702	0	0	0	0.0873925	0.0102513
ENSMUSG00000015314	Slamf6	5.79248	4.82434	3.59648	7.16459	9.24251	3.06865	4.8402	6.11554	9.17896	2.85125	7.47355	2.93783	8.31588	3.62928	6.68739
ENSMUSG00000015316	Slamf1	0.36857	0.00617417	0.313789	0.518068	0.865347	0.537489	1.6593	0.284236	1.14806	1.32592	1.42232	1.42393	0.769781	0.806997	0.359191
ENSMUSG00000015335	Zdhhc12	2.78799	0.530689	1.29257	2.10812	5.47952	2.12733	12.8475	3.95218	2.751	2.47067	2.50759	4.64438	2.68534	3.81886	3.45924
ENSMUSG00000015337	Endog	3.13328	0.20985	0.895133	0.964222	0	0	0	0	0.700383	0.277412	1.46088	0.400656	0.976982	0	0
ENSMUSG00000015340	Cybb	0.418656	0.612426	0.431238	0.331282	4.51146	5.8535	2.05179	2.25364	0.701189	0.839015	0.574904	0.24673	0.608918	1.07293	1.42164
ENSMUSG00000015341	Golga7	4.29724	6.07857	10.7191	7.22469	6.8838	6.17772	6.6049	9.08684	6.52216	4.84464	4.48696	5.85687	5.70799	6.27996	7.18592
ENSMUSG00000015342	Xk	0.61312	0.129012	0.663477	0.921435	0.560939	0.496334	0.678515	0.203884	0.340698	0.275832	0.143738	0.694675	0.544317	0.394812	0.302291
ENSMUSG00000015354	Pcolce2	0	0	0	0.00273576	0	0	0	0	0	0	0	0	0	0	0
ENSMUSG00000015355	Cd48	7.00833	9.45937	15.2329	12.0594	13.8138	20.458	11.3324	16.6804	11.9457	9.7365	7.01852	11.8333	11.3826	14.3542	10.638
ENSMUSG00000015357	Clpx	14.4161	3.68198	4.30829	4.15455	4.1092	6.13577	2.75289	3.78345	10.0912	2.42746	4.82604	2.93641	7.05469	3.90638	2.36288
ENSMUSG00000015363	Trabd	1.34256	3.70176	1.93249	1.48789	4.92087	6.4276	4.38103	1.83314	3.90493	2.33843	3.72051	1.93345	3.21803	2.45828	1.87552
ENSMUSG00000015365	Mov10l1	0	0	0	0	0	0	0	0	0	0	0	0	0	0	0
ENSMUSG00000015377	Dennd6b	0.657841	0.232644	0.304979	2.14871	1.30161	0.701373	0.652982	1.13303	0.494297	0.910829	3.83905	1.33202	1.04382	1.23174	0.955397
ENSMUSG00000015396	Cd83	8.30448	8.19945	10.2915	13.5818	18.2137	12.7733	17.418	11.7943	13.364	12.7404	17.8313	11.3895	17.5861	15.9416	15.2509
ENSMUSG00000015401	Tmem27	0	0	0	0	0	0	0	0	0	0	0	0	0	0	0
ENSMUSG00000015405	Ace2	0	0	0	0	0	0	0	0	0	0	0	0	0	0	0
ENSMUSG00000015437	Gzmb	0	0	0	0.0941805	0	0	0	0	0	0	0	0	0	0	0
ENSMUSG00000015441	Gzmf	0	0	0	0	0	0	0	0	0	0	0	0	0	0	0
ENSMUSG00000015443	Gzmn	0	0	0	0	0	0	0	0	0	0	0	0	0	0	0.00629732
ENSMUSG00000015451	C4a	0	0.303652	0	0.00584073	0.0341639	0	0	0.0208348	1.01595	0	0	0.181742	0.0287577	0.0602073	0.198842
ENSMUSG00000015452	Ager	0	0.407585	0.0802579	0.079104	0.562971	0.486342	1.06352	0.325815	0.69245	2.13721	0.00643267	0.679947	0.218256	0.997446	0.270775
ENSMUSG00000015461	Atf6b	40.944	4.4288	9.86127	14.6468	7.65421	7.20009	36.578	9.03492	23.8683	11.4458	16.386	7.45179	7.36204	6.26766	10.8171
ENSMUSG00000015467	Egfl8	0	0	0	0	0	0	0	0	0	0	0	0	0	0	0
ENSMUSG00000015468	Notch4	8.8096	6.35667	3.95843	1.48052	5.73081	3.86951	2.12291	2.38339	1.53497	2.54518	1.18884	5.64505	1.93492	3.61619	1.52018
ENSMUSG00000015474	Ppt2	4.62746	6.44299	8.67739	10.1016	8.7548	7.9098	28.8328	9.96181	8.17569	6.9447	18.1108	6.3605	6.63707	7.12637	7.06236
ENSMUSG00000015476	Prrt1	0	0	0.207284	0	0.140426	0.201562	0.327466	0.105825	0.171276	0.0425124	3.26508	0.0398621	0.0271259	1.1288	0.255558
ENSMUSG00000015478	Rnf5	3.90884	2.04899	5.68197	5.98308	7.96793	7.04001	5.03596	6.90458	8.4751	5.91697	0.913603	6.98927	5.66482	5.42942	6.01753
ENSMUSG00000015484	Fam163a	0.00377502	0	0	0.00331962	0	0	0	0	0	0	0.00295359	0	0.00298622	0	0.00154576
ENSMUSG00000015488	Cacfd1	6.87798	7.54066	2.89017	5.45722	4.47369	4.67043	4.48026	6.06752	2.00607	5.91904	1.20203	5.48755	3.24928	3.52383	3.65761
ENSMUSG00000015501	Hivep2	1.4335	3.36323	0.251154	0.789909	1.70838	2.29689	1.6135	2.23781	1.40902	0.69947	1.93254	1.24727	1.95124	1.44654	0.751237
ENSMUSG00000015519	2310057J18Rik	0	0	0	0	0	0	0	0	0	0	0	0	0	0	0
ENSMUSG00000015522	Arnt	12.8537	10.8897	14.4133	7.28597	10.7748	7.99884	9.9747	9.37961	12.5138	12.4381	7.48895	8.73672	8.60525	10.2496	11.5951
ENSMUSG00000015533	Itga2	0.186052	0.198084	1.12034	0.901535	0.269011	0.441821	0.0872772	0.237233	0.133993	0.44191	0.184529	0.140269	0.226278	0.186669	0.199711
ENSMUSG00000015536	Mocs2	2.9147	4.13148	5.88748	6.68398	4.65015	9.29682	4.09001	4.01218	8.46071	7.30901	7.86944	6.94382	4.8503	6.48163	4.51157
ENSMUSG00000015542	Nat9	2.87947	3.08555	5.25862	4.65173	3.06585	3.72153	6.45177	2.1659	4.64758	2.91858	4.06343	4.61949	8.43483	4.79471	4.62225
ENSMUSG00000015568	Lpl	1.59275	2.24836	0.713524	2.41082	16.1636	39.3278	21.7561	5.09941	2.21708	4.04586	0.454925	1.40984	3.97471	1.92776	1.70581
ENSMUSG00000015575	Atp6v0e	9.03517	16.3908	29.3286	12.4448	23.0287	20.5547	20.9068	26.6319	11.1132	14.5327	13.1975	13.5044	20.9877	18.9581	14.3638
ENSMUSG00000015579	Nkx2-5	0	0	0	0	0	0	0	0	0	0	0	0	0	0	0
ENSMUSG00000015597	Zfp318	2.41629	14.8783	4.33542	3.34782	3.7071	2.28806	5.18598	3.35872	2.93276	2.98703	5.79114	13.4298	4.41292	3.31854	4.34529
ENSMUSG00000015599	Ttbk1	0.0422331	0.0100367	0.269794	0.19796	0.0667805	0.100958	0.40833	0.0701507	0.0785654	0.278858	0.00264872	0.328895	0.480499	0.205027	0.143376
ENSMUSG00000015605	Srf	1.21628	1.2367	2.73579	2.94938	2.82622	3.14859	3.29414	2.35925	3.14594	3.48646	4.3108	2.92272	3.84075	2.51724	3.27913
ENSMUSG00000015619	Gata3	0.00462672	0.0114119	0.00800696	0.00805843	0.00945485	0.0120311	0.0283093	0.0144819	0.0153953	0.0204662	0.0183526	0.038665	0.0110386	0.00781481	0.0753862
ENSMUSG00000015627	Gata5	0	0	0.00288894	0	0	0	0	0	0	0	0	0	0	0	0
ENSMUSG00000015647	Lama5	0.131474	0	0.0746553	0.0326909	0.0202502	0.0600399	0.866831	0.633178	0.039747	0.0295048	0.101938	0.912365	0.00436227	0.124585	0.0138257
ENSMUSG00000015652	Steap1	0	0	0	0	0	0	0	0	0	0	0	0	0	0	0
ENSMUSG00000015653	Steap2	0	0.00167257	0	0	0.0349616	0	0	0	0	0	0	0.00168531	0	0.0158383	0.00267407
ENSMUSG00000015656	Hspa8	25.5267	35.7534	31.8619	34.8304	47.2756	43.7123	43.2663	45.4796	25.0724	21.6171	22.8934	24.8081	23.7454	15.6451	14.9643
ENSMUSG00000015659	Serac1	4.17906	1.45801	1.52202	4.31546	2.64773	0.943045	1.90101	2.62553	5.22399	1.26627	6.76845	1.20696	3.19392	2.38807	3.59608
ENSMUSG00000015665	Awat1	0	0	0	0	0	0	0	0	0	0	0	0	0	0	0
ENSMUSG00000015668	Pdzd11	8.93723	16.5311	9.6554	16.0635	9.91143	13.8515	7.22341	7.58864	5.6982	6.60055	4.5428	12.0389	8.89708	7.86376	7.94243
ENSMUSG00000015671	Psma2	7.29466	5.76613	9.03892	2.99165	8.25995	7.28693	7.3762	8.79191	5.33799	3.60571	5.11561	4.23951	7.43859	5.33516	3.6454
ENSMUSG00000015672	Mrpl32	1.75279	1.18334	3.85191	2.47855	3.51855	4.77653	5.50846	4.47713	3.03088	3.60934	6.16877	2.37694	2.25305	2.16212	2.29274
ENSMUSG00000015697	Setdb1	5.99653	4.83748	8.58614	6.98581	7.83748	8.89791	4.81806	6.43897	6.01265	7.05222	8.9088	6.78088	8.0704	6.86188	6.14488
ENSMUSG00000015702	Anxa9	0	0	0	0	0	0	0	0	0	0	0	0	0	0	0
ENSMUSG00000015709	Arnt2	0.0187527	0	0.287985	0	0.00248471	0.511826	0.17193	0.0678138	0.0818706	0.0380967	0.0676854	0.0197871	0.23019	0.0955275	1.04818
ENSMUSG00000015711	Prune1	0	0	0	0	0	0	6.79944	0	0	0	0	0	0	0	0
ENSMUSG00000015714	Cers2	20.5922	28.8057	24.4396	23.3795	39.3627	31.3567	40.5025	33.8693	31.7471	24.8088	26.0068	27.0911	31.5309	22.713	21.4295
ENSMUSG00000015721	Nlrp5	0	0	0	0.00535181	0	0	0	0	0.0272112	0	0	0	0	0	0
ENSMUSG00000015733	Capza2	47.9378	75.0973	74.1719	57.3004	57.6807	89.4515	66.2196	53.3	51.6297	64.9537	76.8127	58.75	54.3298	50.9728	69.6832
ENSMUSG00000015745	Plekho1	101.524	157.843	118.765	84.466	78.8743	95.0651	95.6437	62.5793	107.989	105.403	122.281	98.1732	102.483	90.3708	80.6904
ENSMUSG00000015747	Vps45	1.24115	7.44121	2.61194	1.24973	9.5215	4.48549	5.51894	2.11783	1.30637	3.11093	2.30599	2.65502	2.82228	5.2815	3.18481
ENSMUSG00000015748	Prpf3	4.97245	13.0118	7.0783	10.931	12.187	8.30816	10.7079	6.42139	15.5786	8.90198	5.25743	7.99791	5.76854	6.62905	6.55913
ENSMUSG00000015749	Anp32e	11.3828	23.0504	4.73045	5.84155	25.5724	28.6495	25.7444	42.151	14.2941	22.2475	3.96225	12.3226	7.60518	17.4923	15.7321
ENSMUSG00000015750	Aph1a	2.262	3.68936	2.04081	1.5841	1.6777	1.51705	0.898991	2.48506	1.55091	2.16596	2.76396	2.14369	2.72167	1.82748	2.00253
ENSMUSG00000015755	Tab2	26.869	40.1453	26.4394	36.7223	34.0172	33.9156	23.879	25.1847	34.99	34.1476	32.8658	32.4406	28.5316	33.8638	27.6959
ENSMUSG00000015757	Ppil4	1.36849	7.46883	4.74029	3.07768	3.87654	3.89646	4.40705	3.72244	3.37918	3.63263	0.973824	3.31407	3.85223	3.12417	3.31335
ENSMUSG00000015759	Cnih1	1.88938	10.081	6.13726	4.13319	6.32072	11.4071	5.56315	6.65781	5.20191	6.14863	3.59893	3.59775	2.91716	4.504	2.70764
ENSMUSG00000015766	Eps8	1.58539	0.400488	2.10811	0.300141	3.4022	1.80337	6.18944	1.35864	1.92845	2.69291	1.18501	1.43052	1.49649	1.56396	2.23861
ENSMUSG00000015776	Med22	3.83854	14.9937	7.14747	2.13012	5.23644	5.22564	3.04464	6.9294	3.78345	4.40471	4.0035	4.47525	3.72187	5.59272	4.53057
ENSMUSG00000015787	Abo	0	0	0	0	0	0	0	0	0	0	0	0	0	0	0
ENSMUSG00000015790	Surf1	0	0	0	0	0	0	0	0	0	0	0	0	0	0	0
ENSMUSG00000015804	Med28	3.40209	7.39493	10.3224	10.6706	18.0685	17.106	21.2695	19.682	19.9591	9.38857	4.11045	9.44015	7.77127	12.3445	15.5298
ENSMUSG00000015806	Qdpr	1.05005	7.22486	4.17416	2.96123	3.21696	4.19451	4.72333	1.70955	5.47459	4.24324	4.8147	2.44863	2.46738	3.70108	2.13831
ENSMUSG00000015812	Gnrh1	0.0359383	0.184527	1.19353	0.416783	0.529387	0.105949	0.901281	1.26205	0.175557	2.60862	0.132477	0.298996	0.349742	1.12701	0.331027
ENSMUSG00000015829	Tnr	0.00864993	0.0274184	0.00373385	0.000964376	0.019148	0.00581862	0.00296941	0.00171946	0.00494128	0.0207854	0	0	0.000884249	0.0110025	0.00493466
ENSMUSG00000015837	Sqstm1	6.96103	4.0756	9.75213	9.1276	13.4711	8.06132	13.4823	11.2286	8.90919	13.0159	10.6017	9.52909	11.401	10.3595	10.7023
ENSMUSG00000015839	Nfe2l2	34.9051	45.8775	32.8752	44.2747	47.1504	34.6367	50.9214	33.6501	38.9431	39.7211	47.2721	35.5053	38.1314	35.3124	32.3053
ENSMUSG00000015843	Rxrg	0	0	0	0.0155273	0.115155	0.414979	0	0	0	0.188717	0	0	0.207625	0.0747469	0.0685884
ENSMUSG00000015846	Rxra	4.10194	4.38651	5.4524	6.87518	6.00972	3.6637	2.94707	4.27424	6.40001	6.61015	8.05989	7.10597	6.23776	5.30807	6.76072
ENSMUSG00000015850	Adamtsl4	0.571624	0.431523	0.42181	0.813469	1.94611	1.3802	3.13431	1.94691	0.197438	0.234625	2.46764	0.326396	0.240226	0.277951	0.552495
ENSMUSG00000015852	Fcrls	104.406	94.1412	92.1099	111.371	213.339	174.926	217.881	214.404	144.159	111.864	121.676	109.665	131.771	129.773	132.655
ENSMUSG00000015854	Cd5l	0	0	0.0408334	0.00625109	0.204569	0.00620569	0.0189471	0.0653396	0	0	0	0.634223	0.0735	0.0780428	0.0552416
ENSMUSG00000015869	Prpsap1	9.63047	21.077	11.9282	10.3296	8.78071	8.42624	14.1082	7.11429	8.34082	7.78915	8.49479	8.81933	6.79316	7.90869	6.32511
ENSMUSG00000015879	Fam184b	0.188198	0	0.159684	1.0987	0.339814	0.823561	0.240444	0.248695	0.0848056	0.25034	0.105643	0.531756	0.22422	0.243908	0.409647
ENSMUSG00000015880	Ncapg	0	0	0	0	0	0	0	3.65808	0	0	0	0	0	0	0
ENSMUSG00000015882	Lcorl	3.01923	2.25889	3.02365	5.91563	3.78044	6.25072	2.68999	6.09837	4.14269	3.40368	2.73849	3.88715	3.43437	5.21482	3.36869
ENSMUSG00000015889	Lta4h	6.01764	7.51365	7.65427	3.7909	4.06259	3.53798	3.70709	7.10746	5.49015	7.45906	4.14745	5.78283	7.21893	4.87864	6.0017
ENSMUSG00000015890	Amdhd1	0	0	0	0	0	0	0	0	0	0	0	0	0	0	0
ENSMUSG00000015932	Dstn	5.37059	7.3339	6.5042	6.76183	10.0572	9.7014	5.72547	10.9113	7.116	5.82143	4.11236	8.00951	6.56232	8.68488	8.93586
ENSMUSG00000015937	H2afy	10.2441	10.1636	16.7226	17.1128	21.062	19.1845	20.3946	22.071	16.0334	16.9953	14.9329	12.0525	14.0317	15.2874	17.108
ENSMUSG00000015942	Gtf2ird2	0	9.37772	0	0	0	0	0	0	0	0	0	0	0	0	0
ENSMUSG00000015942	Gtf2ird2	1.47132	0.500839	3.03344	0.165478	0.532828	1.17144	0.684824	0.994336	2.86958	0.514444	0	2.93107	0.96377	0.602219	0.181778
ENSMUSG00000015943	Bola1	3.67882	6.76742	5.3057	1.31204	2.98797	2.36405	0.713298	3.13103	4.52334	1.92102	3.97912	2.58231	3.1611	3.11803	2.41799
ENSMUSG00000015944	Gatsl2	9.42103	1.94438	0.884159	1.02206	0.884959	2.02397	1.27731	1.03309	1.14569	1.22546	1.12875	0.880346	0.955319	1.04239	0.581625
ENSMUSG00000015947	Fcgr1	23.4572	25.8653	38.8666	54.6655	75.1964	41.877	85.3314	68.648	53.1751	36.612	45.9831	53.1596	29.6093	47.7421	55.5761
ENSMUSG00000015950	Ncf1	55.7466	50.2039	63.9409	62.5691	70.4918	61.4865	58.8688	58.3995	66.5277	61.2767	69.4995	55.9592	60.8652	57.8536	56.6268
ENSMUSG00000015957	Wnt11	0	0	0	0	0	0	0	0	0	0	0	0	0	0	0
ENSMUSG00000015961	Adss	5.76346	6.2718	5.51448	4.32579	6.00641	5.3753	7.01455	6.34714	4.89831	5.94044	4.91366	5.37606	5.4366	6.03159	5.74683
ENSMUSG00000015962	1700016C15Rik	0	0	0.0214536	0	0.0387848	0.016443	0	0	0.0421567	0	0.0152923	0	0	0	0.0459357
ENSMUSG00000015966	Il17rb	0	1.66706	0	0	0	0	0	0	0	0	0	0	0	0	0
ENSMUSG00000015968	Cacna1d	12.5178	5.7764	3.41702	10.7787	6.1147	5.86613	11.7374	4.13485	3.96681	3.33232	6.3012	5.50325	3.41049	6.08322	6.34701
ENSMUSG00000015970	Chdh	0	0	0	0	0	0	0	0	0	0	0	0	0	0	0
ENSMUSG00000015971	Actr8	16.6556	3.64944	12.3505	8.23559	5.72996	5.15103	13.6561	4.22278	16.335	8.60793	8.35984	9.86479	4.58038	6.73837	8.97962
ENSMUSG00000015980	Lrrc27	0.926908	0	0.435854	0.153389	2.09367	0.556252	1.57529	0.409865	0	0.0756692	0.116464	0.0362458	0.287274	0.186061	0.365836
ENSMUSG00000015981	Stk32c	0	0	0	0	0	0	0	0	0	0	0	0	0	0	0
ENSMUSG00000015994	Fnta	19.0855	5.93846	6.95761	5.59905	11.8203	9.18314	9.63382	5.58313	12.6828	8.46481	4.3704	17.0344	11.6797	10.0735	11.4992
ENSMUSG00000016018	Skiv2l2	10.7883	7.26989	5.46174	4.82177	5.23245	5.67963	7.28151	5.94699	8.92986	5.13211	2.78083	3.78605	3.15814	3.44916	4.09467
ENSMUSG00000016024	Lbp	0.00933533	0	0	0	0.00977167	0	0	0.00917108	0	0	0	0.0111573	0	0.00796079	0.00237801
ENSMUSG00000016028	Celsr1	0	0	0	0.0316538	0.055501	0	0.00386025	0	0.00243433	0.00364327	0.00178758	0.0102177	0.0386472	0.0322609	0.401567
ENSMUSG00000016087	Fli1	32.7261	31.0787	21.0852	37.4736	21.7873	24.4338	21.3212	22.473	39.0576	42.4377	22.0669	33.5761	34.0797	31.6362	27.6962
ENSMUSG00000016128	Stard13	0	0	0	0	0	0	0	0	0	0	0	0	0	0	0
ENSMUSG00000016150	Tenm1	0	0	0	0	0.0233281	0.0128164	0	0	0	0	0.191514	0.0327626	0	0.0340788	0.0188738
ENSMUSG00000016179	Camk1g	0	0	0	0	0	0	0	0	0	0	0.159804	0	0.0588686	0	0
ENSMUSG00000016181	Diexf	1.54592	16.9069	9.52894	4.61908	2.89084	2.11037	4.06574	7.02779	16.5949	9.00605	12.5704	3.10043	2.3279	2.77876	2.73055
ENSMUSG00000016194	Hsd11b1	0	0.0548958	0	0	1.06864	0.0302367	0	0.0678168	0	0	0	0	0	0.108914	0
ENSMUSG00000016200	Syt14	0	0	0	0	0.0212663	0.0211314	0.00666651	0.00784893	0.00192683	0	0	0	0	0.0170407	0.0203798
ENSMUSG00000016206	H2-M3	4.99821	3.30217	3.84063	7.30263	8.81334	5.47774	5.34464	5.73568	7.54596	9.65519	13.3574	6.22396	2.96779	6.07381	6.77695
ENSMUSG00000016239	Lonrf3	3.2142	3.04867	3.4843	3.40753	4.06623	3.21775	3.39075	3.96415	2.78901	2.27035	6.4149	5.11848	3.9941	3.57718	2.49714
ENSMUSG00000016252	Atp5e	9.92392	17.575	12.1725	12.363	29.0946	30.7626	19.1497	26.0367	20.7426	21.7434	24.1746	14.0417	12.849	17.7168	14.4635
ENSMUSG00000016253	Nelfcd	0	0	0	0	0	0	0	0	0	0	0	0	0	0	0
ENSMUSG00000016255	Tubb1	0	0	0	0.0293142	0	0	0	0	0	0	0	0	0	0.00933486	0.00452401
ENSMUSG00000016256	Ctsz	57.9669	38.9906	53.6224	96.3771	159.317	155.237	119.165	117.752	84.5454	97.1594	89.3638	83.0545	93.6916	107.115	95.0386
ENSMUSG00000016257	Prelid3b	10.6798	15.2056	4.23195	5.57698	12.2479	12.4134	9.29485	13.0556	9.67953	7.73058	6.11664	5.91489	6.00186	6.43	8.65196
ENSMUSG00000016262	Sertad4	0.739575	0	0	0	0	0.0441676	0.0901843	0	0	0	0	0	0	0	0.00187298
ENSMUSG00000016283	H2-M2	0	0	0	0	0	0	0	0	0	0	0	0	0	0	0
ENSMUSG00000016308	Ube2a	1.8522	12.5126	5.20541	8.81139	10.3247	8.58214	10.3763	8.62709	8.43869	10.877	7.50135	10.0207	7.32652	4.4905	13.0191
ENSMUSG00000016319	Slc25a5	9.75433	14.7916	7.36653	10.6149	21.391	20.0909	24.4247	19.189	16.4345	9.10367	8.64284	9.34767	13.7141	11.7044	11.0271
ENSMUSG00000016327	Atp1b4	0	0	0	0.00555014	0.0784949	0.0390063	0	0	0.0969799	0.00893787	0.0289578	0.00395974	0.0286102	0.021587	0.0155344
ENSMUSG00000016344	Ppdpf	0.0975767	6.28044	2.39802	1.62088	2.53035	0.72419	2.39192	1.73774	1.4425	3.11121	2.18048	1.37437	1.51766	1.51064	1.45784
ENSMUSG00000016346	Kcnq2	0.0824432	0.0061994	0	0	0.0153987	0	0.127101	0	0	0	0	0	0	0.0583712	0
ENSMUSG00000016349	Eef1a2	0	0	0.0426976	0	0	0.0210299	0	0	0.658878	0.130973	0	0.00917014	0	0.0345517	0.0263767
ENSMUSG00000016356	Col20a1	0.732776	0	0	0.20297	0	0	0	0.219927	0	0.204162	0	0.344374	0	0	0
ENSMUSG00000016382	Pls3	0.295615	4.19017	2.41916	1.56712	1.20964	1.37896	0.657422	2.22594	0.885241	1.26918	2.37334	2.82295	1.20936	1.36898	1.74957
ENSMUSG00000016386	Mpped2	0	0	0	0	0	0	0	0	0	0	0	0	0	0	0
ENSMUSG00000016409	Nkap	3.37039	4.27739	3.60278	2.19544	2.99922	4.05063	2.71842	3.3396	1.65869	1.85089	4.81854	2.54239	2.6097	2.71518	1.99488
ENSMUSG00000016427	Ndufa1	6.24107	20.6265	10.6889	5.59798	15.2849	8.75452	11.8756	16.7658	5.55076	8.36575	3.93394	6.38239	7.73947	8.34994	5.04146
ENSMUSG00000016458	Wt1	0	0	0	0	0	0	0	0	0	0	0	0	0	0	0
ENSMUSG00000016477	E2f3	7.70422	6.06866	7.42533	7.36865	6.04994	6.45935	6.90045	7.0934	8.92625	5.78822	5.8495	6.07533	7.33067	5.51269	5.89584
ENSMUSG00000016481	Cr1l	16.5611	21.6762	15.075	20.0867	15.5995	15.8802	28.5996	19.952	19.3998	15.0674	15.0425	20.6063	19.5	14.5364	14.6927
ENSMUSG00000016487	Ppfibp1	0.945601	2.13344	0.955821	1.01753	1.07196	1.20819	0.537833	1.62987	0.869074	3.00518	2.33987	3.8736	1.0071	0.854837	1.20501
ENSMUSG00000016493	Cd46	0	0	0	0	0	0	0	0	0	0	0	0	0	0	0
ENSMUSG00000016494	Cd34	41.7216	29.8651	45.6884	46.4541	74.52	91.3596	65.8643	77.8495	48.9495	48.2839	35.4909	45.2937	46.2999	58.6728	57.6528
ENSMUSG00000016495	Plgrkt	37.0693	15.2579	22.0406	26.5869	31.2462	28.7935	14.4079	17.6773	28.8964	36.9444	48.3217	34.9329	36.6647	31.2369	36.0995
ENSMUSG00000016496	Cd274	2.40626	2.14017	0.362143	3.37184	3.37225	3.98215	4.81765	1.77314	1.17802	3.06981	1.07474	1.83173	1.52547	1.65344	2.60992
ENSMUSG00000016498	Pdcd1lg2	0	0	0	0.646577	0	0	0	0	0.0295745	0	0	0	0	0	0.0256694
ENSMUSG00000016503	Gtf3a	10.9609	3.00132	7.55098	7.81115	6.39237	4.86522	4.38354	6.40142	9.31682	5.36153	2.66446	2.74315	5.84105	5.07462	3.98057
ENSMUSG00000016510	Mtif3	5.29666	4.97399	1.74976	1.12109	2.97034	3.76981	0.948407	1.39048	1.42742	3.15077	4.5924	3.41996	1.76659	3.22133	2.63464
ENSMUSG00000016520	Lnx2	1.45603	0.597895	0.998092	0.666449	0.937016	2.87063	1.38635	1.60071	0.35376	0.773793	1.90872	1.21707	0.889926	2.00606	1.11107
ENSMUSG00000016524	Il19	0	0	0	0	0	0	0	0	0	0	0	0	0	0	0
ENSMUSG00000016526	Dyrk3	0	0	0	0	0	0	0	0.0749054	0	0	0	0	0.0190906	0	0
ENSMUSG00000016528	Mapkapk2	9.12442	1.84297	4.41144	4.72048	14.1245	17.328	11.1886	12.9184	7.12146	7.97504	9.08971	5.70017	6.32437	6.28205	8.16064
ENSMUSG00000016529	Il10	0	0	0	0	0	0	0	0	0	0	0	0	0	0.0278159	0
ENSMUSG00000016534	Lamp2	62.069	78.3733	85.1453	89.0786	125.25	118.922	121.063	120.003	82.1024	74.0059	101.7	84.6807	88.9377	91.6086	95.3872
ENSMUSG00000016541	Atxn10	5.7991	5.66788	6.53291	4.56392	6.91463	7.82382	12.0216	6.72984	5.16278	5.63785	7.45847	5.61554	5.01161	6.01656	8.81503
ENSMUSG00000016552	Foxred2	0	0	0	0	0	0	0	0.0837726	0	0	0	0	0.146263	0.0266221	0.00369014
ENSMUSG00000016554	Eif3d	4.41322	6.59424	4.37803	6.22683	11.5034	14.8725	7.46591	8.08577	6.86007	5.19221	4.92022	8.09365	3.51729	6.98296	7.04415
ENSMUSG00000016559	H3f3b	4.26675	10.3464	6.55988	7.54939	13.506	11.2175	11.7161	10.0544	13.0236	8.52465	6.71208	14.2075	9.15102	9.04071	12.2654
ENSMUSG00000016619	Nup50	1.90124	2.7993	6.2706	3.83776	4.27077	5.488	3.8265	4.19558	3.46388	2.26034	3.4271	2.63896	3.15418	3.17037	2.15159
ENSMUSG00000016624	Phf21b	1.54849	0.108188	1.09086	3.53488	3.89761	0.448055	0.514107	0.80324	2.21763	1.33327	2.12983	0.924332	0.533727	0.548006	0.707216
ENSMUSG00000016626	Nlrp14	0.0113397	0	0	0	0	0	0	0	0	0	0	0	0	0	0
ENSMUSG00000016637	Ift27	0.548311	0.132517	0.427153	0.376989	0.864562	0.841803	0	0.917152	0.154359	0.506701	0.100872	1.12789	0.434569	0.532727	0.870363
ENSMUSG00000016664	Pacsin2	12.7218	14.9236	17.7906	16.6895	16.9432	11.7074	16.0509	14.594	13.4119	12.7368	11.6384	17.6455	15.4832	15.6537	14.8828
ENSMUSG00000016756	Cmah	0	0	0.00227552	0.00367527	0	0	0.00387636	0	0	0	0.00116336	0	0.00115504	0.00119591	0.00114426
ENSMUSG00000016757	Ttll12	3.56618	0.231587	1.44821	0.736273	1.99585	1.6398	1.81959	3.39718	2.75216	1.86506	4.89897	1.09337	2.07828	1.34098	1.42842
ENSMUSG00000016758	Bik	0.197158	0.385635	0.633306	2.42256	0.341476	0.228201	0.0597106	0.95724	0.281335	0.720293	0.262011	0.0398323	1.00942	0.205477	1.02643
ENSMUSG00000016763	Scube1	0.141893	0.616097	0.338361	1.05759	0.355546	0.197917	0.119785	0.339142	0.548735	0.492731	0.48515	0.696391	0.710805	0.475821	0.379659
ENSMUSG00000016831	Tox4	13.6083	13.9204	13.0526	10.5098	14.1792	12.7762	17.1669	11.0268	12.2535	13.3243	12.7112	9.52055	12.943	13.9791	14.1154
ENSMUSG00000016833	Mrps18c	2.30916	0	2.05412	5.21718	4.6853	2.55513	1.48427	4.16865	1.90546	2.15074	4.09553	4.21679	1.43026	3.036	3.37205
ENSMUSG00000016918	Sulf1	0	0	0.00565189	0	0	0	0	0	0	0	0	0.162763	0	0	0
ENSMUSG00000016921	Srsf6	17.6486	41.518	42.6787	19.439	25.7698	17.1845	25.9483	15.3273	22.3976	21.662	22.3742	15.5101	24.7844	14.9785	18.348
ENSMUSG00000016933	Plcg1	3.3228	5.54808	3.48274	4.4911	5.44502	4.34436	3.37048	4.51441	6.67502	6.91997	5.45234	5.52782	6.09379	3.89821	5.95976
ENSMUSG00000016940	Kctd2	8.15193	7.07229	1.36313	7.66233	3.32339	4.65163	2.92151	3.52159	7.32927	6.85342	1.50554	4.63059	9.2149	4.65407	4.60385
ENSMUSG00000016942	Tmprss6	0	0.172435	0	0	0	0	0	0.0238271	0	0	0	0	0	0	0
ENSMUSG00000016946	Kctd5	2.13545	1.17824	0.475729	1.17413	1.84997	0.984598	1.45007	1.55761	0.841581	1.43821	2.15235	2.33234	0.504103	1.63018	1.33373
ENSMUSG00000016982	Pom121l2	0	0	0	0	0	0	0	0	0	0	0	0	0	0	0.0201709
ENSMUSG00000016984	Etaa1	0.899563	0.573353	1.47909	1.08398	1.09227	0.982065	2.10062	1.89316	0.699645	0.81514	1.21461	1.83559	1.00751	0.814555	1.04655
ENSMUSG00000016995	Matn4	0	0	0	0	0	0	0	0	0	0	0	0	0	0	0
ENSMUSG00000016998	Svs4	0	0	0	0	0	0	0	0	0	0	0	0	0	0	0
ENSMUSG00000017000	Svs6	0	0	0	0	0	0	0	0	0	0	0	0	0	0	0
ENSMUSG00000017002	Slpi	0	0	0	0	0	0	0	0	0	0	0	0	0	0	0
ENSMUSG00000017003	Svs3a	0	0	0	0	0	0	0	0	0	0	0	0	0	0	0
ENSMUSG00000017004	Svs5	0	0	0	0	0	0.493858	0	0	0	0	0	0	0	0	0
ENSMUSG00000017007	Rbpjl	0	0	0	0	0	0	0	0	0	0	0	0	0	0	0
ENSMUSG00000017009	Sdc4	0.00602161	1.97748	1.61248	1.8076	2.09365	1.01388	2.16601	1.05218	1.22548	0.970384	1.05205	2.0845	2.05977	1.96868	1.88185
ENSMUSG00000017049	Ccdc70	0	0	0	0	0	0	0	0	0	0	0	0	0	0	0
ENSMUSG00000017057	Il13ra1	13.9543	20.8224	16.4823	15.0868	11.3113	16.8098	11.3053	12.0167	12.8591	12.024	9.89349	9.88969	11.2862	12.5747	10.5392
ENSMUSG00000017064	Prl5a1	0	0	0	0	0	0	0	0	0	0	0	0	0	0	0
ENSMUSG00000017119	Nbr1	11.6947	17.8289	12.5682	9.55301	7.6129	7.15989	7.12793	6.1039	6.00048	5.59892	5.41325	7.17314	6.77733	8.85847	12.5819
ENSMUSG00000017132	Cyth1	2.52659	4.42406	2.44903	1.43677	2.73044	2.65235	3.89605	1.40225	2.26315	2.96762	1.79905	1.89217	4.92275	2.52008	2.45904
ENSMUSG00000017144	Rnd3	0	0	0.251573	0	0	0.00425754	0.0575629	0	0	0	0	0	0	0.00807823	0
ENSMUSG00000017146	Brca1	0	0	0.0401829	0.204111	1.4979	0.95181	0.371487	4.68361	0.0626777	0.106607	0.046985	0.019823	0.813512	0.481036	0.542648
ENSMUSG00000017165	Gast	0	0	0	0	0	0	0	0	0	0	0	0	0	0	0
ENSMUSG00000017167	Cntnap1	0.181909	0.155542	0.234015	0.277631	0.336686	0.350362	0.308627	0.18464	0.172786	0.211913	0.445455	0.402344	0.3977	0.433862	0.662588
ENSMUSG00000017176	Nt5c3b	0.354576	6.0429	2.42881	2.79817	3.07543	2.24465	6.31992	3.42419	0.568766	2.61284	0.711565	2.65138	5.61888	2.46265	2.09851
ENSMUSG00000017188	Coa3	0	0	0	2.76867	6.39541	6.05353	0	4.47225	6.10765	6.69988	0	3.89432	4.28329	3.74944	2.98868
ENSMUSG00000017195	Zpbp2	0	0	0	0	0	0	0	0	0	0	0	0	0	0.0528548	0
ENSMUSG00000017204	Gsdma	0	0	0	0	0	0	0	0	0	0	0	0	0	0	0
ENSMUSG00000017210	Med24	1.35459	7.44264	8.12974	15.8034	19.1225	10.0764	13.0443	2.16525	17.3684	2.55068	4.23046	11.5326	6.96183	5.93464	5.79364
ENSMUSG00000017211	Gsdma2	0	0	0	0	0	0	0	0	0	0	0	0	0	0	0
ENSMUSG00000017221	Psmd3	1.74967	6.74012	5.6132	5.69453	6.49266	10.7944	10.0616	5.09312	1.52218	4.45541	5.22694	5.90809	5.56129	3.45463	4.21296
ENSMUSG00000017264	Exosc10	8.43062	16.2985	8.43815	8.35385	8.98941	6.63531	7.80405	7.69914	8.05562	9.12062	4.96023	5.82054	5.13037	6.66836	5.58555
ENSMUSG00000017286	Glod4	0	0	0	0	8.85393	8.10118	0	5.31816	0	3.73083	0	6.61045	0	5.42305	3.93886
ENSMUSG00000017288	Vps53	34.4195	5.18622	5.18633	9.31065	5.60874	5.08252	16.8486	13.6127	25.3617	18.921	4.67968	2.16925	7.14491	6.58921	6.09615
ENSMUSG00000017291	Taok1	9.33011	9.2221	9.68213	8.24304	8.17804	7.41378	8.2232	8.12054	7.96349	8.477	9.82296	8.28147	7.54305	7.99928	7.20241
ENSMUSG00000017299	Dnttip1	2.85726	2.84496	3.6615	4.80798	4.17815	3.24109	1.82437	9.78983	5.666	7.56451	18.1952	5.48195	4.12556	8.53664	8.32577
ENSMUSG00000017300	Tnnc2	0	0	0	0	0	0	0	0	0	0	0	0	0	0	0
ENSMUSG00000017307	Acot8	3.90638	0.882098	1.58073	5.38797	2.9133	3.69369	3.6317	5.16114	1.6485	1.37009	1.83119	1.92196	0.524509	0.925497	2.1923
ENSMUSG00000017309	Cd300lg	0	0	0	0	0.0260511	0.00552568	0	0.253701	0	0	0	0	0	0.0106515	0
ENSMUSG00000017310	Spint4	0	0	0	0	0	0	0	0	0	0	0	0	0	0	0
ENSMUSG00000017311	Pyy	0	0	0	0	0	0	0	0	0	0	0	0	0	0	0
ENSMUSG00000017314	Mpp2	0	0	0	0	0.226383	0	0	0.163775	0	0.38653	0	0	0.00690932	0.253482	0
ENSMUSG00000017316	Ppy	0	0	0	0	0	0	0	0	0	0	0	0	0	0	0
ENSMUSG00000017344	Vtn	0	0	0	0	0	0	0	0	0	0	0	0	1.038	0.0410165	0.0200087
ENSMUSG00000017376	Nlk	13.9192	13.4444	9.02304	8.78885	10.2014	9.39681	10.5255	10.0247	13.3007	11.5024	11.0699	11.824	11.5658	9.5229	11.1785
ENSMUSG00000017386	Traf4	1.60714	0.0345494	0.544603	1.03429	0.266478	0.174206	0.188075	0.422682	0.0633444	0.673775	0.763942	0.454433	0.457429	0.40523	0.931155
ENSMUSG00000017390	Aldoc	0.480491	0.134374	0.254201	0.169179	0.256633	0.965149	0.61164	0.205116	1.21653	0.752042	0.5311	0.33344	0.692101	1.16319	0.396325
ENSMUSG00000017400	Stac2	0	0	0	0	0	0	0.0042861	0	0	0.0409812	0.0232542	0	0.309777	0	0.0450249
ENSMUSG00000017404	Rpl19	0.41082	2.49198	4.65184	2.05311	2.56063	2.45877	5.46887	2.76695	0.647457	1.30703	0.266213	1.64079	1.25393	1.55151	1.03877
ENSMUSG00000017405	Nek8	0.232713	0.460622	0.698862	0	0.512315	0.373532	0	0.830617	0.203581	0.0391118	0.0531882	0.925892	0.470915	1.04821	1.53729
ENSMUSG00000017412	Cacnb4	0.0392022	0.564907	0.189839	0.142761	0.0638745	0.0976187	0	0.108641	0.0818329	0.0461263	0.0336096	0.0729113	0.20984	0.255897	0.187035
ENSMUSG00000017417	Plxdc1	6.70802	7.24828	11.8044	10.749	10.1713	12.7265	8.07097	7.94115	13.1402	11.0826	11.0795	11.4933	11.6051	10.7271	10.1222
ENSMUSG00000017418	Arl5b	1.30321	6.49861	3.22357	1.13671	2.52737	1.99038	3.60523	2.4666	2.7329	1.93624	2.38478	2.54828	2.3954	2.51034	2.0668
ENSMUSG00000017421	Zfp207	29.5	33.4981	33.4212	55.8977	41.1711	50.254	80.5573	68.7976	43.3374	52.1491	40.9272	53.9198	48.0344	55.8208	32.3615
ENSMUSG00000017428	Psmd11	3.24057	7.87008	7.62142	9.98337	7.88956	7.92217	9.5174	7.41944	7.43938	7.97565	9.13013	6.52317	6.3328	7.45822	6.60453
ENSMUSG00000017446	C1qtnf1	0	0	0.00709236	0.0208285	0	0	0	0.0561291	0	0	0	0	0	0	0.00974602
ENSMUSG00000017453	Pipox	0	0	0	0	0	0	0	0	0	0	0	0	0	0.00615368	0
ENSMUSG00000017466	Timp2	28.7729	36.8184	38.1027	38.8536	41.8732	30.0583	30.0193	29.5005	40.9487	30.83	40.437	29.4567	33.107	34.6054	32.7498
ENSMUSG00000017485	Top2b	5.51922	4.67983	20.3655	2.55842	3.5381	8.05131	13.0456	9.20511	4.65333	7.35644	2.02554	7.47194	3.04746	3.91747	3.01813
ENSMUSG00000017491	Rarb	0	0	0	0	0	0	0	0	0	0	0	0	0	0	0
ENSMUSG00000017493	Igfbp4	7.05317	3.3855	1.34218	3.04961	1.50027	8.05129	2.02569	4.14212	1.7895	2.63686	3.33732	2.03793	2.91607	1.91899	1.83256
ENSMUSG00000017499	Cdc6	0	0	0.163867	0	0.428542	0.946985	0.254746	1.039	0.015807	0.240653	0.554041	0.00667751	0.216313	0.131949	0.0907245
ENSMUSG00000017548	Suz12	1.74999	5.51397	3.61082	3.57884	5.31549	4.73414	4.03378	6.44283	3.85484	2.46981	5.71439	4.3059	2.67852	4.2831	3.5277
ENSMUSG00000017550	Atad5	0.621141	0.319085	0.306135	0.302139	1.59876	2.5773	0.447111	4.00517	0.28737	0.991818	0.336172	0.655959	1.2645	0.760093	0.86836
ENSMUSG00000017561	Crlf3	11.4048	49.3047	18.4304	16.021	15.8385	15.7523	12.2558	14.9857	28.2606	16.0959	17.493	17.6495	16.9614	17.311	15.2677
ENSMUSG00000017588	Krt27	0	0	0	0	0	0	0	0	0	0	0	0	0	0	0
ENSMUSG00000017607	Tns4	0.0840695	2.10342	1.13864	3.67471	1.83414	3.86161	0.457501	1.80776	1.47442	0.728744	1.2202	1.86088	3.23318	0.885045	2.2055
ENSMUSG00000017615	Tnfaip1	6.06278	8.39526	4.23773	5.77136	6.27477	7.39723	6.75174	7.18462	4.94803	5.6626	6.9719	5.31209	6.74798	4.81227	3.55421
ENSMUSG00000017631	Abr	9.89776	6.53416	8.33856	11.073	33.6426	10.5792	11.9718	31.6253	14.5277	11.4974	15.2646	11.068	10.2393	10.7179	16.0089
ENSMUSG00000017639	Rab11fip4	0.263733	0	0.074868	0.0242607	0.193375	0.413011	0.411764	0.444828	1.03765	0.110996	1.47503	0.154946	0.125434	0.108844	0.189388
ENSMUSG00000017652	Cd40	0.0893996	0	0.18387	0	0.02991	0.645288	0.235307	0.118326	0.0623773	0.127994	0	0.0164792	0	0.224838	0.693581
ENSMUSG00000017664	Slc35c2	5.62397	4.10926	14.1151	11.1061	25.8306	17.3212	16.9691	15.9879	20.1213	16.7622	14.2952	12.6462	13.7512	11.7612	15.2993
ENSMUSG00000017667	Zfp334	0.0465686	0.287202	0.186285	0.339022	0.0676441	0.0121035	0.0169944	0.0729374	0.330849	0.168348	0.00422729	0.0896289	0.318699	0.0925559	0.0861274
ENSMUSG00000017670	Elmo2	6.2791	6.53674	5.18785	11.6715	11.7741	11.4005	32.3474	11.3206	14.3994	19.3896	13.899	9.18769	8.89298	8.68525	8.06452
ENSMUSG00000017677	Wsb1	34.6711	53.6812	76.1216	60.7333	48.4356	57.2651	35.3232	45.5405	59.0616	61.3268	59.6713	59.5128	63.7479	58.3993	49.5778
ENSMUSG00000017679	Ttpal	8.84852	5.22851	6.40171	6.72947	3.09168	6.52889	3.31429	3.49493	5.38102	5.23856	5.69777	5.62147	4.71459	4.7086	5.46877
ENSMUSG00000017686	Rhot1	13.023	21.2495	8.58583	5.90747	8.83391	6.11337	7.8141	6.17635	8.35898	10.5929	8.568	10.3682	8.29631	7.16744	6.76513
ENSMUSG00000017688	Hnf4g	0	0	0	0	0	0	0	0	0	0	0	0	0	0	0
ENSMUSG00000017692	Rhbdl3	0.13301	0.00502626	0	0	0.103553	0.00365984	0	0.0462499	0	0.0829572	0	0.101725	0.0331924	0.0744401	0.0224097
ENSMUSG00000017697	Ada	1.21646	0.379294	1.51432	1.85664	1.42316	1.96165	1.27287	4.28274	1.92543	5.13517	5.59241	2.86397	1.12446	2.73391	2.39216
ENSMUSG00000017707	Serinc3	390.592	391.876	423.781	392.037	305.603	347.29	305.353	297.061	424.029	358.237	385.383	384.88	334.682	364.47	300.491
ENSMUSG00000017713	Tha1	2.13612	0.139666	1.23042	2.41437	3.55794	4.1187	5.69684	2.76451	4.32082	3.05959	4.62142	2.62192	1.89615	3.00443	2.5564
ENSMUSG00000017715	Pgs1	2.32706	6.86804	3.35187	5.05236	7.34822	7.55742	16.0276	8.7492	7.23085	6.14324	3.7661	6.9507	6.68872	5.20828	4.6885
ENSMUSG00000017716	Birc5	0.692483	0	0.00237526	0.0228962	5.22804	9.45397	1.4112	16.7652	0.00478137	0.142777	0.649539	0.135461	0.361111	4.77225	1.32022
ENSMUSG00000017718	Afmid	0	0	0	0	0	0	0	0	0	0	0	0	0	0	0
ENSMUSG00000017720	Trp53tg5	0	0	0	0	0	0	0	0	0	0	0	0	0	0	0
ENSMUSG00000017721	Pigt	15.4944	6.90255	8.59388	13.5332	30.4275	16.5369	17.3144	28.7545	15.3629	15.4838	12.5458	15.1657	14.7425	17.2978	18.7706
ENSMUSG00000017723	Wfdc2	0	0	0	0	0	0	0	0	0	0	0	0	0	0	0
ENSMUSG00000017724	Etv4	0.202643	0	0	0	0.32788	0.0542708	0.0591162	0.154325	0	0.00559665	0	0	0.286441	0.474827	0.547797
ENSMUSG00000017733	Eppin	0	0	0	0	0	0	0	0	0	0	0	0	0	0	0
ENSMUSG00000017734	Dbndd2	3.25058	3.907	0.336214	0.276176	0	0	0	0	1.12462	1.36283	2.32282	1.15267	0	0.401803	0
ENSMUSG00000017737	Mmp9	0	0	0	0	0	0	0	0	0	0	0	0	0	0.00835176	0
ENSMUSG00000017740	Slc12a5	0.0516735	0	0.107073	0.210181	0.280198	0.51684	0.331545	0.223286	0.0569262	0.332136	0.656388	0.166049	0.449331	0.41545	0.102066
ENSMUSG00000017747	Ghdc	1.30572	3.27629	1.48874	2.31471	1.55327	1.79246	2.49122	1.16249	1.74306	3.74598	0.85557	0.760032	2.81363	2.53045	1.13738
ENSMUSG00000017754	Pltp	0	0	0	0	0	0	0	0	0	0	0	0	0	0	0
ENSMUSG00000017756	Slc12a7	1.07194	0.710216	12.6764	2.16733	5.27845	3.72519	5.34689	3.05732	1.83838	2.14441	1.96993	2.51677	2.45237	1.56946	2.72676
ENSMUSG00000017760	Ctsa	68.2121	77.9271	64.9525	85.7571	212.993	192.714	194.779	134.709	145.508	119.714	126.538	147.598	138.677	154.875	175.772
ENSMUSG00000017764	Zswim1	0.566149	2.68125	1.47759	3.19717	1.62919	0.468142	3.90148	2.49545	1.47044	2.15936	3.86157	1.56212	1.75973	1.39904	2.07208
ENSMUSG00000017765	Slc12a4	1.29165	0.430281	1.43917	1.95003	1.93833	3.59852	11.1398	1.28744	2.01042	1.1341	2.76327	5.18369	3.74057	3.59241	1.70992
ENSMUSG00000017767	Spata25	2.43798	0	0	3.60143	0	0	0	0	0.869755	0	0	0	0	0	0
ENSMUSG00000017774	Myo1c	7.41469	1.9812	5.03794	5.0623	7.60861	12.2744	6.42087	5.67446	6.3148	6.45551	3.94955	5.70548	5.39854	4.6066	4.65536
ENSMUSG00000017776	Crk	22.9431	15.3976	10.2246	9.55913	7.96803	11.224	15.4206	11.8679	10.2163	8.29748	7.88316	8.616	9.60588	8.30325	8.51666
ENSMUSG00000017778	Cox7c	7.47984	3.28416	3.47513	3.7004	5.64059	7.14359	1.81491	5.92422	3.3614	3.81861	4.48608	4.9012	3.25298	6.73788	6.65196
ENSMUSG00000017781	Pitpna	10.9851	17.7549	19.9768	22.8033	31.5585	32.7601	28.7638	35.6346	24.0469	22.8194	15.7758	20.2769	16.0064	19.6275	23.283
ENSMUSG00000017801	Mlx	7.27373	6.41052	1.47452	1.96792	5.11245	1.41819	7.79704	1.79865	4.64149	2.16529	3.55408	3.34382	3.88786	2.25895	3.01141
ENSMUSG00000017802	Retreg3	2.63035	3.7572	3.549	3.55607	3.23678	2.40476	6.38441	3.4728	3.22008	4.64716	5.19072	2.70849	5.69999	2.97729	2.67884
ENSMUSG00000017817	Jph2	0	0	0	0	0	0	0	0	0	0	0	0	0	0	0
ENSMUSG00000017830	Dhx58	3.38905	6.44097	4.67094	6.19489	11.368	7.19609	1.28664	4.51038	2.85526	7.12173	1.59031	3.78257	4.48668	5.20227	8.75366
ENSMUSG00000017831	Rab5a	1.04364	7.43543	3.83678	2.03451	2.97895	2.54727	2.09991	2.68538	3.3669	3.27883	3.20537	3.46812	3.6059	3.08236	2.9803
ENSMUSG00000017832	Hspb9	0.0812524	0	0.0761885	0	0.263214	0.141567	0.39464	0.0412193	0	0.0944902	0	0	0.384359	0.896263	0.124767
ENSMUSG00000017837	Nkiras2	0	0	0	0	7.73212	0	0	0	0	0	0	0	0	0	0
ENSMUSG00000017843	Ppp2r5c	7.60334	13.4317	16.031	14.4602	17.463	12.7159	17.2075	10.9812	18.2303	11.4971	9.93318	9.08753	12.0923	10.4998	11.0758
ENSMUSG00000017858	Ift52	3.53533	9.21273	4.47551	3.93088	2.92909	7.65645	12.825	6.43809	11.4422	4.30743	1.56592	5.7929	5.27358	3.93755	3.37071
ENSMUSG00000017861	Mybl2	0	0.00505488	0.129158	0.0902466	0.355153	0.428752	0.948978	0.595285	0	0	0.993805	0.0277729	0.0373742	0.04234	0.239589
ENSMUSG00000017868	Sgk2	0	0	0	0	0	0	0	0	0	0	0	0	0.00430431	0.00789861	0
ENSMUSG00000017897	Eya2	0	0	0	0	0	0	0	0	0	0	0	0	0	0	0
ENSMUSG00000017922	Prl3c1	0	0	0	0	0	0	0	0	0	0	0	0	0	0	0
ENSMUSG00000017929	B4galt5	11.3227	1.29748	5.6916	1.71465	5.62151	4.99036	11.1301	11.0715	5.08117	5.02653	9.09105	9.09643	11.7256	7.02927	7.7713
ENSMUSG00000017943	Gdap1l1	0	0	0.494322	0.10391	0	0	0	0.0321867	0.207255	0.032731	0.136083	0.0474221	0.0106474	0.0170537	0
ENSMUSG00000017950	Hnf4a	0	0	0	0	0	0	0	0	0	0	0	0	0	0	0.00685987
ENSMUSG00000017969	Ptgis	0	0	0	0	0	0	0	0	0	0	0	0	0	0	0
ENSMUSG00000017978	Cadps2	0	0	0	0	0	0.130187	0	0	0	0	0	0	0.00326749	0	0.00394045
ENSMUSG00000017999	Ddx27	1.59945	0.41976	2.38597	2.87437	6.49137	3.76751	7.15309	2.87606	4.26354	4.57305	8.16117	2.64781	4.49124	2.77521	3.0933
ENSMUSG00000018001	Cyth3	4.93579	3.53692	5.67438	3.19559	3.24116	2.19178	4.96804	3.19945	4.32646	4.12899	2.2085	3.79522	5.1381	4.66506	4.69569
ENSMUSG00000018008	Cyth4	56.6841	34.531	32.1356	55.9847	55.168	41.2338	60.1344	39.9355	71.5083	65.8725	61.4895	67.424	57.0174	57.5842	51.3801
ENSMUSG00000018012	Rac3	4.26321	1.64481	5.46218	2.14041	0.524216	5.21606	2.0004	0.347297	2.16373	2.0738	1.17687	0.774048	2.05759	1.20215	1.04125
ENSMUSG00000018040	Rrp7a	3.82444	11.6322	16.508	10.3476	19.4273	18.6619	12.3465	20.7874	30.7351	12.1748	8.84664	13.2577	19.5416	18.3513	13.8593
ENSMUSG00000018042	Cyb5r3	4.28047	1.9991	4.13126	4.70573	13.3282	9.89457	8.34611	11.8715	6.80331	9.15731	4.79121	4.15833	3.77452	5.96923	5.71145
ENSMUSG00000018068	Ints2	0	0	0	0	0	0	0	0	0	0	0	0	0	0	0
ENSMUSG00000018076	Med13l	5.37291	4.53313	7.13119	10.4322	8.99232	8.37726	9.5705	6.54885	7.20489	8.92249	9.03599	8.45623	8.19201	8.26128	12.5603
ENSMUSG00000018102	Hist1h2bc	0.120462	2.4274	0.452934	1.07501	1.57968	1.12323	0.0672311	1.15054	1.00854	0.829912	0.991894	1.31786	0.901184	0.967727	1.07061
ENSMUSG00000018126	Baiap2l2	0.0495437	0	0	0.0709483	0.841374	0.0540742	0.0947421	0	0	1.43899	0	0	0.115933	0	0
ENSMUSG00000018143	Mafk	0.649428	0.868927	1.99702	0.417638	1.50642	4.25407	0.50571	1.55916	1.41927	2.9693	1.28528	0.851413	1.36326	1.69491	1.08706
ENSMUSG00000018160	Med1	11.8512	9.78277	12.1251	11.3962	11.9843	8.01309	24.4197	8.57334	11.0188	13.4904	22.8516	10.246	11.4311	8.72068	8.19149
ENSMUSG00000018166	Erbb3	0.0169483	0	0	0	0.00248968	0	0.0320363	0.0376897	0	0	0.0783515	0.0229063	0	0	0.000988687
ENSMUSG00000018167	Stard3	15.0873	9.52972	13.8442	30.5318	19.6408	24.4989	31.7083	10.1002	17.5515	21.1313	18.0794	22.6888	16.9693	17.2214	18.6735
ENSMUSG00000018168	Ikzf3	0	0	0	0	0.0274308	0	0	0	0	0	0	0	0	0	0
ENSMUSG00000018169	Mfng	19.4647	7.08914	13.625	20.0258	16.5004	12.2462	10.9343	11.2553	19.6339	21.5865	18.8209	16.6445	20.0882	19.2523	13.2868
ENSMUSG00000018171	Vmp1	10.4289	8.71944	12.1571	10.9507	49.5482	51.6582	81.3172	51.7031	7.12113	16.0866	8.16984	13.4671	17.6926	18.3759	28.5284
ENSMUSG00000018189	Uchl5	10.079	8.32965	5.19562	3.67343	8.84166	12.7953	9.14961	8.31547	3.97174	3.65692	7.67846	5.07954	6.13095	6.14585	3.08363
ENSMUSG00000018196	Glrx2	8.6641	2.9922	5.95577	4.10557	3.89802	3.10987	5.39483	3.88739	4.15616	6.61847	6.83763	3.33505	3.63059	4.2902	3.8329
ENSMUSG00000018199	Trove2	1.25961	1.87706	0.95206	1.47435	1.41378	1.43739	0.470036	1.64052	1.25793	1.0574	1.60468	0.906739	1.64786	1.03012	0.771115
ENSMUSG00000018209	Stk4	10.3015	12.8399	8.25627	10.5545	11.2917	11.5879	7.55177	10.6412	12.9937	18.1039	9.81198	11.2274	19.5655	10.0665	16.2226
ENSMUSG00000018211	Wfdc15b	0	0	0	0	0	0	0	0	0	0	0	0	0	0	0
ENSMUSG00000018217	Pmp22	88.421	82.3236	79.4216	145.585	144.122	85.7654	79.2229	117.25	143.612	128.253	150.251	121.989	126.526	153.379	122.62
ENSMUSG00000018238	Gdf9	0.284971	0.537922	0.78702	1.70188	0.697229	0.10075	2.27862	0.454127	1.88099	0.543326	0.358783	0.606795	0.788567	1.10306	0.586498
ENSMUSG00000018239	Zcchc10	1.76968	6.44324	1.6298	1.62108	1.62572	0.553019	3.07138	2.10469	0.329047	3.83407	2.22971	1.52594	3.30566	1.38524	1.16556
ENSMUSG00000018259	Prl8a2	0	0	0	0	0	0	0	0	0	0	0	0	0	0	0
ENSMUSG00000018263	Tbx5	0	0	0	0	0	0	0	0	0	0	0	0	0	0	0.00145144
ENSMUSG00000018286	Psmb6	11.0686	4.30049	8.69741	17.4575	19.1526	16.6678	15.1446	19.4982	16.1138	23.1549	13.2663	10.6756	14.2336	16.8673	14.7378
ENSMUSG00000018287	Spag7	2.29014	8.64402	5.03415	3.76239	4.67507	4.26	4.80268	5.5051	5.61024	7.77937	5.06154	4.03053	5.05942	5.0005	6.1171
ENSMUSG00000018293	Pfn1	142.133	94.9288	145.172	150.985	296.876	305.764	186.41	259.06	169.231	140.821	163.591	136.908	157.496	144.099	153.019
ENSMUSG00000018322	Tomm34	9.66782	7.24163	9.90766	10.0906	9.7074	8.62912	5.91175	6.49573	10.408	8.98519	11.0406	10.0792	11.1734	8.65891	7.93359
ENSMUSG00000018326	Ywhab	14.558	22.6716	22.1148	23.6416	33.5166	30.9342	34.0228	32.5691	31.8064	16.6541	19.6113	19.5192	15.3002	19.1604	22.0478
ENSMUSG00000018334	Ksr1	3.71586	0.394271	1.52312	1.98565	0.87562	1.36687	1.50838	1.02011	1.96034	1.63329	7.55979	2.10082	2.13248	2.5934	4.87524
ENSMUSG00000018339	Gpx3	0.11524	0.0570727	0	0.182272	1.4126	1.70829	0.084767	1.70212	0.300579	0.163834	0.140789	0.250383	0.16005	1.28334	0.872338
ENSMUSG00000018340	Anxa6	3.67459	2.60384	2.90996	6.90912	4.67384	5.4208	2.86371	5.25747	6.56038	2.32333	4.23743	2.63658	5.74255	5.20327	3.3322
ENSMUSG00000018341	Il12rb2	0	0	0	0	0	0	0	0	0	0	0	0	0	0	0
ENSMUSG00000018347	Zkscan6	1.96485	0.327439	2.4645	1.37103	1.21158	1.23941	2.30039	1.05716	1.55355	2.10647	2.36556	3.19393	1.25246	2.05995	1.69059
ENSMUSG00000018362	Kpna2	0.0580575	4.59779	3.11818	2.58105	4.28912	5.58542	0.745318	11.5635	0.7842	2.48348	2.10166	5.85016	2.30758	5.94293	3.5202
ENSMUSG00000018363	Smurf2	7.02015	8.46379	7.85147	9.91999	11.0889	7.81441	8.09028	10.1588	9.91572	8.60646	10.397	9.80228	7.4702	8.29258	8.97586
ENSMUSG00000018372	Cep95	10.0566	16.7172	5.0431	6.05656	9.71645	5.23735	5.5297	9.73635	10.8965	8.3165	6.91728	8.17775	5.5466	8.49376	6.19797
ENSMUSG00000018377	Vezf1	4.52024	5.73813	6.51623	4.64858	3.68197	3.6226	6.8331	4.01824	7.60085	6.46709	8.08192	6.78059	4.02552	5.22732	3.89432
ENSMUSG00000018378	Cuedc1	0	0	0	0	0	0	0.565821	0	0	0	0	0	0.046438	0	0
ENSMUSG00000018379	Srsf1	16.0868	21.6814	21.739	11.8443	17.3809	13.0727	19.9679	16.023	20.3163	17.1163	16.9496	16.8379	16.1099	13.981	16.5253
ENSMUSG00000018381	Abi3	425.699	97.7057	120.351	342.076	415.638	314.736	329.092	88.5229	118.357	130.517	130.826	456.966	114.834	91.9652	366.418
ENSMUSG00000018387	Shroom1	0.19058	0.758285	0.571259	0.0170448	0.732604	0.277324	0.218931	0.246583	0.158107	0.486022	0.619087	0.572538	0.782383	0.469979	0.68426
ENSMUSG00000018395	Kif3a	1.84396	0.710682	1.92439	3.62004	2.31328	0.946822	2.10458	2.27758	3.25913	1.91493	2.97599	1.26669	1.23017	1.08432	1.75679
ENSMUSG00000018398	Sept8	2.42369	3.12967	4.92738	4.56849	3.26667	4.96683	6.43114	4.06655	2.97516	3.21741	2.73661	4.49753	3.89397	3.69878	4.30248
ENSMUSG00000018401	Mtmr4	1.2917	2.83059	3.63281	3.82435	3.96619	3.72492	4.72758	2.97572	3.36573	2.38008	4.76841	3.69395	2.66593	2.17503	2.53705
ENSMUSG00000018405	Mrm1	1.04028	1.36004	0.925416	0.919107	2.8871	1.38855	0.554858	0.881965	1.70978	4.46335	0.0633738	2.25558	2.70516	1.29394	1.23596
ENSMUSG00000018411	Mapt	0	0.0100671	0.575416	0.375827	0.053951	0.041666	0.0946614	0.025946	0.455474	0.195617	0.37402	0.270724	0.255181	0.138303	0.0575555
ENSMUSG00000018412	Kansl1	11.5554	10.122	14.8309	14.5302	13.8291	12.1314	13.5031	10.7592	14.3204	11.8433	13.8961	11.502	10.9544	12.6163	10.1795
ENSMUSG00000018415	Gid4	0.68963	1.07232	1.52704	2.50599	1.49673	1.89841	2.36869	2.22771	1.77782	1.2288	2.11911	1.15175	1.68879	1.49434	1.14686
ENSMUSG00000018417	Myo1b	27.3459	23.7364	6.55942	8.55397	7.49453	7.49852	16.7207	7.24164	10.3804	16.9543	11.5735	13.1785	12.0792	8.50401	9.9238
ENSMUSG00000018425	Dhx40	0.741341	1.44168	1.40871	1.10141	1.16708	0.692113	3.87931	2.22465	1.27404	1.22192	1.4855	1.80034	1.72687	1.37662	1.82383
ENSMUSG00000018427	Ypel2	2.27118	1.99774	3.41382	2.07865	1.59631	1.81162	0.39939	0.968173	1.96743	2.17254	2.75007	2.28589	2.22153	2.8739	2.10365
ENSMUSG00000018428	Akap1	1.544	0.49924	0.0758114	0.349748	0.933023	1.35272	1.36694	0.697337	0.397194	0.588403	0.123574	0.363704	2.88988	0.695694	0.733255
ENSMUSG00000018433	Nol11	9.94152	6.42527	6.73892	3.61551	4.16036	7.33969	7.10692	4.1178	3.9004	3.66743	3.6509	4.3542	4.43864	3.99498	3.42748
ENSMUSG00000018442	Derl2	14.4145	19.7633	18.5963	11.6486	15.4956	15.3415	15.29	14.0055	11.9605	13.3478	11.6023	12.3551	12.6492	13.4317	7.8437
ENSMUSG00000018446	C1qbp	6.82286	3.84313	11.0135	7.25447	15.0987	21.5428	27.8395	14.2233	7.99603	6.13413	5.67269	8.44885	10.2823	7.80321	7.38639
ENSMUSG00000018449	Rpain	5.04903	12.1541	9.18842	8.81996	10.4507	6.38301	2.86068	7.64427	9.16898	7.40739	7.88609	6.49143	10.6851	8.57514	8.21771
ENSMUSG00000018451	6330403K07Rik	0	0	0	0.0189004	0.109835	0	0	0.43597	2.25468	0	0	0.162635	0.739744	0.0899504	0.254285
ENSMUSG00000018459	Slc13a3	12.1583	11.7853	5.61844	6.33023	7.94205	20.3735	3.77267	4.87248	7.69918	6.93435	8.51497	2.4392	5.1165	8.33806	8.49127
ENSMUSG00000018470	Kcnab3	0.00719258	0.0230141	0.0343413	0.14915	1.29701	0.174329	0.395396	0.724639	0.0785029	0.343286	0.779913	0.230975	0.2562	0.220804	0.540607
ENSMUSG00000018474	Chd3	8.6366	6.10316	4.21054	1.94497	5.43357	1.28788	1.13444	2.34287	6.5862	10.2273	17.035	4.21419	3.4616	6.996	8.27479
ENSMUSG00000018476	Kdm6b	2.87955	1.39406	3.17337	1.925	2.22839	2.08606	18.8775	2.10945	3.09911	1.94135	2.32452	3.28975	8.13275	2.02803	1.92976
ENSMUSG00000018479	1700125H20Rik	0	0	0	0	0	0	0	0	0	0	0.0183856	0	0.0123678	0	0.0460183
ENSMUSG00000018481	Appbp2	4.72377	7.28699	6.12176	6.6355	4.32614	5.11734	5.41185	4.5496	3.96649	6.22028	3.80611	5.77854	4.90045	4.59423	4.55451
ENSMUSG00000018486	Wnt9b	0	0	0	0	0	0	0	0	0	0	0	0	0	0	0
ENSMUSG00000018500	Adora2b	0	0	0.0143805	0.205005	0.060223	0.663861	0.102128	0.0262731	0	0	0	0.0298714	0	0.0352157	0
ENSMUSG00000018501	Ncor1	53.674	46.2014	54.0305	56.2626	31.4485	30.2111	65.7397	55.2529	67.2225	64.7021	62.2298	57.3884	59.6055	23.9691	30.8194
ENSMUSG00000018507	Trpv2	12.3765	7.11091	10.515	10.4887	7.35857	8.0825	4.78406	8.51199	10.8284	12.2795	10.009	11.3034	6.95367	7.37367	9.67489
ENSMUSG00000018509	Cenpv	5.43732	1.75049	2.46164	4.0408	3.45109	0.868781	3.29618	2.33697	1.85391	2.33691	6.35046	1.76372	1.95553	1.22803	1.96822
ENSMUSG00000018537	Pcgf2	0.0437475	0.586453	3.88767	3.81676	1.66647	3.65833	3.85043	1.02122	1.73339	0.735306	3.27959	1.39904	0.734364	1.86274	1.48299
ENSMUSG00000018541	Cwc25	1.10756	3.58166	2.24553	1.25666	2.16441	2.09093	2.39087	2.73133	1.98737	2.54548	3.00957	2.91471	1.48402	2.19791	1.10246
ENSMUSG00000018543	1700001P01Rik	0.028113	0	0	0.0958594	0.168404	0.0950104	0.970859	0.0433622	0.540239	0	0	0.222882	0.410889	0.0693419	0.0892333
ENSMUSG00000018547	Pip4k2b	12.5084	7.7537	10.8008	7.47438	6.47563	6.37231	7.02893	8.10533	10.2111	11.6841	14.8684	9.07896	9.39543	6.64397	7.04566
ENSMUSG00000018548	Trim37	1.0998	0.571514	0.876729	0.751812	0.837494	4.49686	0.88481	1.32987	2.1624	2.38299	1.59404	2.00998	1.0033	1.55226	0.530821
ENSMUSG00000018554	Ybx2	0	0	0	0	0	0	0	0	0	0	0	0	0	0	0
ENSMUSG00000018559	Ctdnep1	9.85364	10.0405	9.2454	24.5859	25.4693	25.0315	18.9436	29.6748	33.6487	22.7472	18.9611	19.1038	31.1574	16.2565	30.5521
ENSMUSG00000018565	Elp5	2.25024	0	0	0	4.50566	0	7.86303	0	0	2.59299	0	4.80631	0	3.4023	0
ENSMUSG00000018566	Slc2a4	0	0	0	0	0	0	0	0	0	0	0	0	0	0	0
ENSMUSG00000018567	Gabarap	28.3413	37.4606	42.5924	27.7522	43.4393	42.7691	34.6789	38.6624	32.4433	20.0317	26.8823	30.9124	28.0443	36.9914	34.1913
ENSMUSG00000018569	Cldn7	0	0	0	0	0.0776954	0	0	0	0	0	0.0153002	0.107893	0	0.152244	0
ENSMUSG00000018570	2810408A11Rik	0.659224	0	0.537648	0.00923508	0.0108098	0.43931	0	0.0724921	0.2426	0.00634884	0	0.308194	0.105596	0	0.0448972
ENSMUSG00000018572	Phf23	4.95864	5.27114	3.29602	8.92644	5.03666	4.48448	8.91342	6.24585	5.27676	8.70076	6.12286	7.24065	5.1707	5.61713	4.74123
ENSMUSG00000018574	Acadvl	8.25028	2.68831	12.4511	6.20593	4.47001	7.60379	8.10359	16.1419	2.66461	10.7218	5.18072	8.73756	11.333	7.55604	8.78703
ENSMUSG00000018581	Dnah11	0	0	0	0	0	0	0	0	0	0	0	0	0	0	0
ENSMUSG00000018583	G3bp1	3.07965	4.2424	3.08082	3.13511	4.61325	4.48861	5.86845	4.16389	7.12494	2.52813	1.17794	3.01271	3.49539	3.36272	2.94249
ENSMUSG00000018585	Atox1	7.96304	4.12061	14.2508	9.57881	17.231	9.33968	11.1422	14.8499	8.65931	11.9464	14.327	10.4014	8.91963	10.9145	9.76377
ENSMUSG00000018589	Glra2	0	0	0.00227431	0	0.026278	0	0	0.0773128	0	0.427197	0	0	0	0	0
ENSMUSG00000018593	Sparc	533.739	465.135	535.168	567.703	940.53	854.742	678.895	806.377	664.649	541.17	570.77	540.124	530.038	696.67	651.845
ENSMUSG00000018595	Glra4	0.301621	0.814582	0.0105905	0.176466	0.125215	0.0138062	1.09379	0.100812	0	0.11115	0.0441404	0.132165	0.0501712	0.345165	0.0547235
ENSMUSG00000018599	Mief2	1.78693	0.871254	0.855112	4.66076	2.46268	1.25339	1.36038	0.538732	1.96551	6.60126	5.59482	1.25882	1.0289	1.33053	0.899264
ENSMUSG00000018604	Tbx3	0	0	0	0	0	0	0	0	0	0.00565196	0.125002	0	0	0	0
ENSMUSG00000018620	Mmp20	0	0	0	0	0	0	0	0	0	0	0	0	0	0	0
ENSMUSG00000018623	Mmp7	0	0	0	0	0	0	0	0	0	0	0	0	0	0	0
ENSMUSG00000018634	Crhr1	0	0	0	0	0	0	0	0	0	0	0	0	0	0	0
ENSMUSG00000018648	Dusp14	0.107008	0.509549	0.0557631	0	0.0549107	0	0.0184176	0.149902	0.0583496	0.117386	0.0371627	0.0123964	0.0251809	0.0089679	0.152501
ENSMUSG00000018651	Tada2a	1.18678	1.24388	1.72938	1.70115	1.6247	0.836296	3.38384	1.23429	1.46402	1.97531	1.22604	1.50565	1.55421	1.58965	2.71173
ENSMUSG00000018654	Ikzf1	69.7341	72.2093	73.7247	67.0899	65.7384	80.9409	46.7849	58.6908	66.4243	63.79	82.1043	74.3492	83.1959	60.0682	68.4816
ENSMUSG00000018656	Tcaf3	0	0	0	0	0	0	0	0	0	0	0	0	0	0	0
ENSMUSG00000018659	Pnpo	0	0	0	0	0	0	0	2.42327	3.25646	5.14693	8.00993	4.05273	3.61132	4.53735	0
ENSMUSG00000018661	Cog1	8.28355	11.4875	7.21169	3.98663	4.53752	5.08942	3.20332	2.3832	5.18414	4.60677	10.1999	8.69137	7.69133	3.39323	9.31393
ENSMUSG00000018666	Cbx1	4.84496	5.99187	8.2629	8.12229	4.3486	3.95847	11.8085	5.59754	5.0045	6.62248	5.51271	5.35089	5.00411	5.97056	4.79102
ENSMUSG00000018669	Cdk5rap3	0	0	0	3.71886	7.37582	3.19423	0	2.15534	0	0	0	0	3.25856	0	0
ENSMUSG00000018672	Copz2	2.23353	17.7559	3.59506	3.64259	5.89271	2.29427	16.0769	2.01227	2.16381	0.958825	4.86293	3.31981	2.69196	6.57054	3.13225
ENSMUSG00000018677	Slc25a39	1.12459	4.37108	7.9691	3.75429	7.27109	8.29903	13.2201	8.36107	4.64446	3.61667	5.24168	6.3582	3.80777	2.94912	3.96254
ENSMUSG00000018678	Sp2	10.4654	5.86907	9.1525	7.04407	7.08825	6.40406	11.5231	5.17431	7.40898	11.1538	6.32386	8.69453	4.48487	8.71158	6.92569
ENSMUSG00000018697	Aatf	5.2788	5.27625	3.82704	7.73456	7.08129	5.55492	11.359	4.62391	4.56407	5.74437	5.61692	4.82702	4.51496	4.03352	3.99317
ENSMUSG00000018698	Lhx1	0	0	0	0	0.020225	0.0822114	0	0	0	0	0	0	0	0.0133703	0
ENSMUSG00000018707	Dync1h1	7.66537	7.25428	6.98939	8.58551	14.1784	14.6546	13.3731	14.6383	10.0416	8.76981	7.77743	8.73552	10.3117	9.68487	9.89905
ENSMUSG00000018727	Cpsf4l	1.10056	0.365675	1.31803	0.726044	0.464327	3.16717	0.319548	1.10243	0.719746	0.470837	0.31288	0.0865109	0.411295	1.30832	0.291485
ENSMUSG00000018733	Pex12	0	0	0	0	0	3.53788	0	0	0	0	2.84674	0	0	0	0
ENSMUSG00000018736	Ndel1	2.30611	9.55119	4.81903	4.19502	4.18073	5.01368	8.98044	3.13389	3.578	5.7131	2.07065	3.71482	5.69271	4.83565	3.46942
ENSMUSG00000018740	Slc25a35	0.568586	0.894838	1.43307	0.657968	3.13234	1.23417	1.40135	1.46696	3.37702	2.34486	1.88725	1.97631	1.08378	2.10664	1.3066
ENSMUSG00000018750	Zbtb4	4.95522	3.59115	26.732	5.39227	4.21419	5.91199	6.50724	13.5311	6.54657	8.30041	11.8557	7.04463	9.06258	6.54385	6.01647
ENSMUSG00000018752	Tnfsfm13	4.00054	0	0	0	3.33563	0	0	1.32364	2.78594	4.22755	0	2.59358	2.63186	4.42568	4.02512
ENSMUSG00000018761	Mpdu1	7.39241	9.8968	6.08509	8.35452	11.7984	8.00401	8.16956	10.3168	6.5643	9.62442	7.50552	10.7741	6.68545	9.43963	9.12419
ENSMUSG00000018765	Fxr2	12.747	2.19098	3.80576	10.2916	3.28462	11.9647	4.40045	2.71456	2.59327	6.84771	2.53407	2.98871	2.76308	2.99181	5.12789
ENSMUSG00000018770	Atp5g3	5.51049	9.92021	11.0118	14.5493	23.745	15.1926	14.2793	21.0295	17.1455	14.7411	8.90528	10.4287	17.3025	9.20841	11.4046
ENSMUSG00000018774	Cd68	133.739	164.685	171.384	145.631	343.444	240.94	186.156	212.648	175.41	136.478	173.146	133.865	190.381	196.514	178.681
ENSMUSG00000018776	Slc35g3	0.00937796	0	0	0	0	0	0	0	0	0	0	0	0	0.0157109	0
ENSMUSG00000018796	Acsl1	11.1127	12.5868	8.11176	4.59874	5.4527	5.98184	11.694	5.46272	6.27566	11.2734	11.0846	7.47494	6.33684	5.95226	7.05662
ENSMUSG00000018800	Abca5	0	0	0.0026247	0.128956	0.174693	0.139872	0.159525	0.126105	0.0112016	0.00478264	0.00971453	0.0209576	0.00271492	0.136575	0.0229808
ENSMUSG00000018809	Smyd4	0.294263	7.46198	0.294824	0.856481	1.60836	5.7879	3.92371	2.38498	1.45832	1.19038	0.432661	0.566697	1.45631	1.33764	1.02766
ENSMUSG00000018819	Lsp1	21.8816	15.2515	19.6267	20.2209	16.5515	14.6456	12.6689	5.85627	20.3639	18.7546	21.8928	15.9805	18.3317	25.6645	25.753
ENSMUSG00000018820	Zfyve27	3.56415	4.13961	3.4403	4.49358	5.07907	5.2824	7.42632	4.57357	5.80167	4.85453	3.57574	6.87508	5.18602	6.26311	5.73031
ENSMUSG00000018821	Avpi1	0.0993812	0.136284	0.138634	0.281199	0.622841	0.748482	0.1785	0.0511827	0.693448	0.42919	0	0.218962	0.55268	0.539653	0.555528
ENSMUSG00000018822	Sfrp5	0	0	0	0	0	0.16945	0	0.0289342	0	0	0.566505	0	0.0896973	0.037511	0
ENSMUSG00000018830	Myh11	0	0.0109932	0	0.0109401	0.0447276	0	0	0.13839	0	0	0	0.0801846	0.023571	0.0195574	0.00169188
ENSMUSG00000018841	Rad51d	0.828223	0.747233	1.93514	7.46244	2.3178	3.78406	6.71382	0.68042	4.76243	1.71364	1.63651	2.5228	3.37233	2.36745	2.7595
ENSMUSG00000018844	Fndc8	0	0	0	0	0	0	0	0.0627051	0	0	0	0	0	0	0
ENSMUSG00000018845	Unc45b	0	0	0	0	0	0	0	0	0	0	0	0	0	0	0
ENSMUSG00000018846	Pank3	2.08722	5.64457	6.22807	3.02992	4.35284	4.95207	6.21	4.85746	4.255	2.86995	4.40749	3.85546	3.10959	3.92867	3.54917
ENSMUSG00000018848	Rars	6.2372	9.76118	11.1964	9.62093	12.8714	10.3963	9.83872	11.597	10.0545	8.16449	9.46787	7.809	10.8087	7.05866	7.32697
ENSMUSG00000018849	Wwc1	0	0	0	0	0.0972615	0.0264881	0.041601	0.0327278	0	0.0226385	0.0918558	0.0314729	0	0.153448	0.128618
ENSMUSG00000018858	Mrpl58	4.6099	1.16475	1.29444	5.04046	7.46494	2.95944	2.78898	4.22673	4.14838	3.63369	2.72705	3.08145	3.97685	3.69838	3.4461
ENSMUSG00000018861	Fdxr	2.58335	2.11867	0.97186	0.512881	3.79896	1.05884	1.74514	0.631767	3.26585	0.824705	1.6751	2.56393	3.14711	1.60358	1.3711
ENSMUSG00000018862	Otop3	0	0	0	0	0	0	0	0	0	0	0	0	0	0	0
ENSMUSG00000018865	Sult4a1	0.00719637	0.124973	0	0.570645	0.218545	0.542476	0	0.0109141	0.163484	0.516368	0.212207	0.519325	0.509356	0.406157	0.560739
ENSMUSG00000018868	Pnpla5	0	0	0	0	0	0	0	0	0	0	0	0	0	0	0
ENSMUSG00000018882	Mrpl45	0.502452	0.513255	2.43748	0.886423	1.34255	1.97742	0.394665	2.78102	0.362236	1.306	0.705379	0.771584	0.651387	0.645601	0.997005
ENSMUSG00000018893	Mb	0	0	0	0	0	0	0	0	0	0	0	0	0	0	0
[truncated: 51,317 more rows]
