# Supplementary material for: Regulatory T-cells inhibit microglia-induced pain hypersensitivity in female mice
Source: eLife. 2021 Oct 15;10:e69056. doi: 10.7554/eLife.69056 (PMC8639143; doi:10.7554/eLife.69056)
Supplement: Supplementary file 3. [file elife-69056-supp3.xlsx]

## Sheet: DEgenes_TregKO_CSF1_vs_WT_CSF1
Ensembl_ID	Gene_ID	baseMean	log2FoldChange	lfcSE	pvalue	padj
ENSMUSG00000049723	Mmp12	154.684	10.6037	2.9837	5.58972e-11	3.19901e-08
ENSMUSG00000062629	Olfr114	78.5701	9.34928	2.96242	4.22687e-08	8.31548e-06
ENSMUSG00000061336	Olfr116	34.2511	7.9066	2.80678	1.34559e-06	0.000148613
ENSMUSG00000042842	Serpinb6b	31.8433	7.49757	3.0241	2.27072e-05	0.00147812
ENSMUSG00000086712	AI427809	33.0709	7.45295	3.13445	4.13881e-05	0.0024275
ENSMUSG00000033730	Egr3	86.9869	7.44524	1.40456	2.40103e-07	3.74758e-05
ENSMUSG00000113998	Gm40909	27.7476	7.06399	3.16127	8.67037e-05	0.00448647
ENSMUSG00000052376	NA	21.0393	6.71172	2.96478	7.83136e-05	0.00411013
ENSMUSG00000086430	NA	21.5059	6.69845	3.01069	9.45592e-05	0.00473713
ENSMUSG00000083897	NA	21.2811	6.67596	3.01143	9.83925e-05	0.0048518
ENSMUSG00000081873	NA	17.8729	6.44259	2.90134	9.88818e-05	0.00486323
ENSMUSG00000116088	NA	19.5224	6.4161	3.09404	0.000185272	0.00752483
ENSMUSG00000087547	Platr27	18.2756	6.30395	3.06277	0.000199726	0.00792587
ENSMUSG00000114371	NA	17.4171	6.18017	3.08556	0.000248652	0.00933608
ENSMUSG00000085289	NA	18.0185	6.15038	3.17632	0.000307744	0.0109661
ENSMUSG00000078247	Airn	16.5881	6.03908	3.12426	0.000320681	0.0113203
ENSMUSG00000108422	NA	14.6128	6.02086	2.89854	0.000196084	0.00783422
ENSMUSG00000074607	Tox2	15.5183	5.90924	3.12038	0.000372241	0.0125315
ENSMUSG00000105257	NA	14.3681	5.83764	3.03056	0.000344425	0.0120649
ENSMUSG00000024186	Rgs11	35.2491	5.81952	1.63953	9.05849e-05	0.00463628
ENSMUSG00000086813	NA	28.1971	5.33798	1.75613	0.000318013	0.0112472
ENSMUSG00000115647	NA	28.9117	5.25868	1.89877	0.000489706	0.0154261
ENSMUSG00000036103	Colec12	52.8281	5.23957	1.13923	4.17742e-07	5.75875e-05
ENSMUSG00000113042	NA	23.4651	5.12344	1.65239	0.000353588	0.0122082
ENSMUSG00000020057	Dram1	35.2538	5.08637	1.29864	1.15725e-05	0.000847125
ENSMUSG00000105992	NA	21.5484	4.9964	1.63613	0.000424771	0.0138314
ENSMUSG00000112058	NA	22.5199	4.99317	1.70517	0.000491114	0.0154261
ENSMUSG00000105377	NA	51.5346	4.84967	1.00123	1.10085e-07	1.94305e-05
ENSMUSG00000097842	9330104G04Rik	21.2681	4.83347	1.77437	0.000725217	0.0203356
ENSMUSG00000084991	NA	30.2167	4.73966	1.39925	5.61948e-05	0.00310175
ENSMUSG00000032186	Tmod2	53.2598	4.32223	1.72105	0.000177546	0.00730532
ENSMUSG00000103596	NA	52.6853	4.276	1.33852	3.23277e-05	0.00196949
ENSMUSG00000096923	NA	29.7541	4.21919	1.23697	3.67451e-05	0.00218917
ENSMUSG00000032679	Cd59a	26.0829	4.11788	1.80826	0.000634847	0.0184394
ENSMUSG00000040855	Reps2	141.275	4.11349	0.612762	6.98571e-13	8.79548e-10
ENSMUSG00000101939	NA	95.8544	4.10148	0.659626	2.21384e-11	1.59023e-08
ENSMUSG00000035121	Neil2	76.9467	4.08653	0.989836	9.71256e-07	0.000113229
ENSMUSG00000117917	NA	22.6706	4.08545	1.61165	0.000486374	0.0153606
ENSMUSG00000004267	Eno2	56.7761	4.08363	1.34212	4.4805e-05	0.00260365
ENSMUSG00000026875	Traf1	31.2845	3.98847	2.41898	0.00123066	0.0291988
ENSMUSG00000070527	Mkrn3	35.5886	3.9308	1.97484	0.000666423	0.0191278
ENSMUSG00000060568	Fam78b	26.8667	3.87893	2.23717	0.0013248	0.0306204
ENSMUSG00000100599	1700120C14Rik	26.8915	3.87713	1.44117	0.000240109	0.00912415
ENSMUSG00000048905	4930539E08Rik	39.7253	3.86047	1.72172	0.000388921	0.0129316
ENSMUSG00000111806	LOC115487188	51.8177	3.84889	1.19003	2.86451e-05	0.00179731
ENSMUSG00000106662	NA	20.4562	3.83693	1.67325	0.000800687	0.0216335
ENSMUSG00000114007	NA	56.7121	3.79312	1.18588	2.99505e-05	0.00185507
ENSMUSG00000070369	Itgad	30.0904	3.77606	1.25238	9.03609e-05	0.00463628
ENSMUSG00000114537	NA	20.8109	3.77384	1.79752	0.00106743	0.0263173
ENSMUSG00000024697	Gna14	54.2569	3.76941	1.08365	1.25407e-05	0.00090055
ENSMUSG00000090043	NA	25.7596	3.75803	1.49978	0.000364926	0.0124267
ENSMUSG00000086968	4933431E20Rik	40.9508	3.72964	1.13783	3.01205e-05	0.00185901
ENSMUSG00000027276	Jag1	79.5109	3.72241	0.638331	2.51797e-10	1.08078e-07
ENSMUSG00000102632	NA	35.6842	3.64483	1.34582	0.000160197	0.00678029
ENSMUSG00000099422	Gm4275	21.5058	3.62016	2.05396	0.00156445	0.0340679
ENSMUSG00000109238	Gm35060	18.3395	3.5845	1.76139	0.0013265	0.0306204
ENSMUSG00000113268	NA	33.4517	3.53819	1.29173	0.000151999	0.0065242
ENSMUSG00000083569	NA	22.2387	3.50144	1.52427	0.000626054	0.0183122
ENSMUSG00000097558	NA	48.6363	3.46199	1.0397	2.2733e-05	0.00147812
ENSMUSG00000074388	NA	22.442	3.4461	1.58341	0.000753894	0.0206968
ENSMUSG00000086123	NA	18.1456	3.43579	1.91986	0.00179289	0.0377485
ENSMUSG00000100120	NA	17.4491	3.43509	1.82969	0.00168436	0.0357828
ENSMUSG00000023951	Vegfa	40.6271	3.42924	1.84713	0.000713838	0.0201518
ENSMUSG00000115543	NA	212.68	3.41638	0.55668	2.42224e-11	1.6096e-08
ENSMUSG00000058297	Spock2	18.1871	3.34796	2.01746	0.00203761	0.041468
ENSMUSG00000110676	NA	28.676	3.32034	1.66407	0.00076313	0.0208574
ENSMUSG00000009376	Met	54.6561	3.30788	1.02753	2.92232e-05	0.00182148
ENSMUSG00000073529	F830208F22Rik	18.7463	3.27838	2.25882	0.00244531	0.0467904
ENSMUSG00000011263	Exoc3l2	17.0491	3.22861	2.08713	0.00247556	0.0469224
ENSMUSG00000025586	Cpeb1	54.9464	3.17078	1.41967	0.000349854	0.0121236
ENSMUSG00000108926	NA	26.29	3.16269	2.3927	0.00180987	0.0380637
ENSMUSG00000056222	Spock1	53.7612	3.12235	1.09112	8.67078e-05	0.00448647
ENSMUSG00000099543	NA	67.28	3.11212	0.716366	4.53411e-07	6.16051e-05
ENSMUSG00000039313	Minar1	289.011	3.08398	0.54166	3.28337e-10	1.29187e-07
ENSMUSG00000035513	Ntng2	34.3683	3.07739	1.28276	0.000333017	0.0116903
ENSMUSG00000038418	Egr1	1394.02	3.06871	0.496537	1.75377e-11	1.32487e-08
ENSMUSG00000109303	NA	46.3279	3.0584	1.01955	6.44527e-05	0.00346796
ENSMUSG00000020234	4930404N11Rik	35.8307	3.05319	1.37739	0.000460036	0.0147009
ENSMUSG00000018930	Ccl4	1704.68	2.9991	0.533355	5.08391e-10	1.84644e-07
ENSMUSG00000089959	NA	62.1308	2.97192	0.948533	3.83269e-05	0.00227581
ENSMUSG00000089746	NA	72.9472	2.96018	0.665783	2.88257e-07	4.35522e-05
ENSMUSG00000116895	Gm3435	34.4163	2.94595	0.959915	6.59622e-05	0.00353909
ENSMUSG00000115071	NA	31.4791	2.93613	1.02202	0.000120203	0.00558431
ENSMUSG00000026981	Il1rn	285.68	2.91394	0.488032	7.06223e-11	3.81078e-08
ENSMUSG00000000982	Ccl3	3005.42	2.90664	0.508012	3.2118e-10	1.29187e-07
ENSMUSG00000112433	Gm30122	29.585	2.89525	2.62177	0.0019575	0.0401405
ENSMUSG00000021125	Arg2	44.7146	2.84854	0.881515	3.52476e-05	0.00213361
ENSMUSG00000117808	NA	28.7412	2.84719	1.20136	0.000415645	0.0136757
ENSMUSG00000022026	Olfm4	69.5143	2.84281	1.23182	0.000309624	0.0110124
ENSMUSG00000103174	NA	151.404	2.82535	0.580598	3.29462e-08	6.8574e-06
ENSMUSG00000108122	NA	46.0707	2.77632	1.18689	0.00034645	0.0120721
ENSMUSG00000036390	Gadd45a	32.9302	2.76017	1.08847	0.000270962	0.00996194
ENSMUSG00000097559	NA	54.9801	2.75379	1.53613	0.000812601	0.0217685
ENSMUSG00000075288	NA	31.4317	2.73984	1.23365	0.000531437	0.0164267
ENSMUSG00000073485	NA	93.8386	2.73206	1.13975	0.000250631	0.00937309
ENSMUSG00000090675	Olfr111	895.375	2.72384	0.365637	2.99222e-15	1.13022e-11
ENSMUSG00000022636	Alcam	895.657	2.69769	0.360651	2.27307e-15	1.07323e-11
ENSMUSG00000045382	Cxcr4	23.9722	2.68588	1.29548	0.000831142	0.0220773
ENSMUSG00000105717	NA	55.7774	2.66446	0.767944	1.50274e-05	0.00105898
ENSMUSG00000061723	Tnnt3	43.5158	2.65724	1.88654	0.00141431	0.0316477
ENSMUSG00000113035	5830428M24Rik	37.1767	2.63617	1.27181	0.000655075	0.0188594
ENSMUSG00000085354	NA	79.3352	2.63461	1.16177	0.000355626	0.0122338
ENSMUSG00000020027	Socs2	73.7937	2.59761	0.656411	2.39514e-06	0.000234376
ENSMUSG00000082677	NA	134.926	2.58524	1.02378	0.000189807	0.00761083
ENSMUSG00000099988	1700054A03Rik	21.5983	2.55153	1.63945	0.00186979	0.0388481
ENSMUSG00000100658	NA	45.8981	2.54628	0.979365	0.000206893	0.00811392
ENSMUSG00000027071	P2rx3	25.9831	2.5345	2.22758	0.00226659	0.0448016
ENSMUSG00000102575	NA	67.9371	2.51729	0.980171	0.000199808	0.00792587
ENSMUSG00000086648	Gm15511	25.5815	2.5095	2.23483	0.00232288	0.0452399
ENSMUSG00000015568	Lpl	4160.07	2.50477	0.371483	4.82905e-13	7.60012e-10
ENSMUSG00000109237	NA	22.7474	2.48556	1.90598	0.00228712	0.0450248
ENSMUSG00000033597	Caskin1	50.2602	2.48204	1.0935	0.000419916	0.0137175
ENSMUSG00000026726	Cubn	75.6159	2.48078	0.950107	0.000175589	0.00724054
ENSMUSG00000061972	Olfr99	133.959	2.45969	0.596362	1.08961e-06	0.000124717
ENSMUSG00000082917	NA	117.677	2.43485	0.637699	3.71711e-06	0.000347531
ENSMUSG00000102882	NA	54.7731	2.4332	1.0032	0.000303235	0.010867
ENSMUSG00000106965	NA	37.2728	2.33674	1.24334	0.000987152	0.024891
ENSMUSG00000086111	Gm15326	50.3207	2.33399	0.769675	6.96156e-05	0.00371401
ENSMUSG00000106772	NA	153.016	2.32292	1.23022	0.000748315	0.0206316
ENSMUSG00000041809	Efhc1	71.4008	2.32129	0.958654	0.000300648	0.0107948
ENSMUSG00000090564	NA	52.9012	2.31646	0.703694	3.1152e-05	0.001904
ENSMUSG00000090894	Olfr110	71.8506	2.29494	1.28875	0.00098278	0.024869
ENSMUSG00000080906	NA	58.8323	2.29444	1.17865	0.000780709	0.0212044
ENSMUSG00000053360	NA	46.5732	2.28087	1.0698	0.00061711	0.0180974
ENSMUSG00000113349	NA	56.1513	2.27153	0.791488	0.000108043	0.00513978
ENSMUSG00000092524	NA	27.8296	2.2665	2.01597	0.00242801	0.0465538
ENSMUSG00000050335	Lgals3	246.921	2.26	0.569409	2.06726e-06	0.000211039
ENSMUSG00000113440	NA	65.3075	2.22546	2.31055	0.00195267	0.040085
ENSMUSG00000084381	AA413626	43.5756	2.20427	1.31628	0.0013286	0.0306204
ENSMUSG00000050526	Mgat4f	37.9834	2.19111	1.30701	0.00138195	0.0312156
ENSMUSG00000105027	NA	143.067	2.18538	0.923875	0.000332694	0.0116903
ENSMUSG00000086736	NA	43.6114	2.09863	0.916051	0.000501245	0.0156471
ENSMUSG00000117315	NA	123.171	2.08191	0.503491	1.23227e-06	0.000136898
ENSMUSG00000116628	4930478L05Rik	101.634	2.08103	0.741924	0.000124849	0.00572404
ENSMUSG00000079293	Clec7a	3338.4	2.06586	0.290195	4.10367e-14	9.68773e-11
ENSMUSG00000022357	Klhl38	117.999	2.04157	1.01465	0.000744335	0.0205587
ENSMUSG00000087203	Gm13986	51.1036	2.0377	0.780117	0.000244187	0.00920503
ENSMUSG00000117494	NA	65.3345	2.02478	0.779778	0.000236465	0.00902198
ENSMUSG00000102369	NA	147.305	1.99763	0.611114	3.11022e-05	0.001904
ENSMUSG00000021838	Samd4	55.0079	1.99375	0.905331	0.000604287	0.0179443
ENSMUSG00000114438	NA	93.0469	1.98827	0.718815	0.000148346	0.00641114
ENSMUSG00000103377	NA	92.5424	1.97859	1.02373	0.000895571	0.0232972
ENSMUSG00000027962	Vcam1	128.414	1.97672	0.897408	0.000532462	0.0164315
ENSMUSG00000081650	NA	45.483	1.97431	2.19638	0.00255518	0.0478267
ENSMUSG00000020340	Cyfip2	48.9606	1.96472	0.951331	0.000817952	0.0218808
ENSMUSG00000113425	NA	42.2583	1.96275	2.21165	0.00263018	0.0484205
ENSMUSG00000015970	Chdh	113.189	1.94891	0.509785	4.62821e-06	0.000418222
ENSMUSG00000044667	Plppr4	50.7544	1.94763	1.10371	0.00130287	0.0303573
ENSMUSG00000108358	NA	101.794	1.94351	0.749385	0.000235654	0.00900925
ENSMUSG00000114980	4933432I03Rik	110.818	1.9402	0.662691	9.41771e-05	0.00473713
ENSMUSG00000114148	NA	43.6748	1.9227	0.943761	0.000906746	0.0234595
ENSMUSG00000104524	NA	72.3729	1.90537	0.753755	0.000296372	0.0106615
ENSMUSG00000030532	Hddc3	47.8727	1.90423	1.06621	0.00133106	0.0306204
ENSMUSG00000108185	NA	91.4562	1.88298	0.862349	0.000614622	0.0180974
ENSMUSG00000054304	NA	144.626	1.87518	0.586574	4.27584e-05	0.00250011
ENSMUSG00000026628	Atf3	585.916	1.86645	0.492351	4.82108e-06	0.000429486
ENSMUSG00000104677	NA	148.968	1.8626	0.546986	2.151e-05	0.00142041
ENSMUSG00000080831	NA	83.0046	1.85978	1.21916	0.00171848	0.0364242
ENSMUSG00000032443	NA	70.0542	1.84174	0.838574	0.000638284	0.0184887
ENSMUSG00000052675	Zfp112	70.4859	1.83878	0.854125	0.000695524	0.0197232
ENSMUSG00000059479	B3gnt8	128.442	1.83534	0.841909	0.000615806	0.0180974
ENSMUSG00000015340	Cybb	1052.9	1.83518	0.482648	4.6846e-06	0.000420854
ENSMUSG00000104943	NA	116.702	1.832	1.09593	0.00142918	0.0317842
ENSMUSG00000105990	NA	248.054	1.83173	0.658622	0.000143527	0.00624574
ENSMUSG00000105936	NA	167.938	1.82054	0.578283	5.00094e-05	0.00282632
ENSMUSG00000017639	Rab11fip4	88.4891	1.80996	0.807689	0.000576991	0.0174232
ENSMUSG00000061601	Pclo	53.2535	1.79392	1.38799	0.00237795	0.0458897
ENSMUSG00000077420	NA	56.7319	1.79075	0.83539	0.00076247	0.0208574
ENSMUSG00000078502	Gm13212	102.35	1.78594	0.636263	0.000147352	0.00638278
ENSMUSG00000030731	Syt3	49.1589	1.78419	0.818308	0.000732665	0.0204087
ENSMUSG00000103867	NA	320.992	1.78015	0.492591	1.01058e-05	0.000754492
ENSMUSG00000106288	NA	395.451	1.77762	0.347227	1.24231e-08	3.21401e-06
ENSMUSG00000025854	Fam20c	457.591	1.7772	0.416271	7.20528e-07	8.8363e-05
ENSMUSG00000032911	Cspg4	82.392	1.77565	0.657468	0.000203648	0.00802941
ENSMUSG00000107835	NA	99.7058	1.771	1.05648	0.00150055	0.0328763
ENSMUSG00000039236	Isg20	79.5877	1.76233	0.717673	0.000378485	0.0126964
ENSMUSG00000040537	Adam22	420.967	1.73908	0.448965	4.15389e-06	0.000384561
ENSMUSG00000026893	Gca	121.608	1.73775	0.703327	0.000353589	0.0122082
ENSMUSG00000097885	NA	118.871	1.73698	1.03825	0.00152327	0.0332968
ENSMUSG00000044345	Marveld1	59.7156	1.73158	1.00588	0.00157308	0.0341485
ENSMUSG00000089185	NA	101.728	1.70743	0.572188	9.39561e-05	0.00473713
ENSMUSG00000117332	NA	141.919	1.69537	0.590502	0.000127263	0.00579095
ENSMUSG00000115183	NA	62.1463	1.69068	1.40336	0.00264183	0.0484956
ENSMUSG00000041552	Ptchd1	248.892	1.673	0.373534	3.16108e-07	4.65476e-05
ENSMUSG00000096054	Syne1	85.029	1.67213	0.754082	0.000674566	0.0192822
ENSMUSG00000021614	Vcan	198.595	1.66719	0.602637	0.000169243	0.00704036
ENSMUSG00000002985	Apoe	9085.07	1.65258	0.390865	9.09332e-07	0.000107335
ENSMUSG00000029828	4921507P07Rik	64.4068	1.64915	0.877149	0.00130548	0.0303636
ENSMUSG00000032656	March3	289.967	1.64255	0.557239	0.00010107	0.004887
ENSMUSG00000108820	NA	1030.03	1.63759	0.428542	4.93054e-06	0.000437175
ENSMUSG00000037868	Egr2	95.0082	1.63165	1.29349	0.00256684	0.0479024
ENSMUSG00000102594	NA	95.8992	1.62588	0.761408	0.000810032	0.0217614
ENSMUSG00000108753	NA	157.226	1.6224	0.434133	7.4789e-06	0.000601049
ENSMUSG00000003282	Plag1	366.722	1.6221	0.400693	2.02525e-06	0.00020901
ENSMUSG00000102813	NA	78.1342	1.60579	0.752532	0.000846527	0.0223915
ENSMUSG00000024430	Cabyr	77.1089	1.58785	0.698461	0.000651785	0.018804
ENSMUSG00000103220	NA	129.658	1.57979	0.97135	0.00185492	0.0386374
ENSMUSG00000107647	NA	133.644	1.57353	0.627449	0.000362683	0.0124088
ENSMUSG00000101191	NA	205.621	1.5684	0.549024	0.000142035	0.00620942
ENSMUSG00000118630	NA	82.9172	1.56583	0.682599	0.000629281	0.0183122
ENSMUSG00000027712	Anxa5	796.182	1.5582	0.372235	1.17656e-06	0.000133057
ENSMUSG00000115041	NA	208.229	1.54435	0.701337	0.000719589	0.0202753
ENSMUSG00000070287	Slc35g2	134.629	1.54122	0.440505	1.94463e-05	0.00130235
ENSMUSG00000110248	NA	100.174	1.53494	0.741067	0.000990283	0.0249366
ENSMUSG00000102562	NA	208.309	1.52878	0.456338	3.03693e-05	0.00186825
ENSMUSG00000117027	NA	135.004	1.52555	0.587615	0.000304828	0.0109034
ENSMUSG00000105856	NA	101.927	1.52005	0.612501	0.000416382	0.0136762
ENSMUSG00000117916	9630028I04Rik	118.147	1.51664	0.687912	0.000759962	0.0208311
ENSMUSG00000000724	Cryba1	104.29	1.51451	0.790574	0.00131568	0.0305633
ENSMUSG00000104745	NA	156.01	1.51442	0.481778	6.393e-05	0.0034605
ENSMUSG00000104525	NA	262.835	1.50744	0.724895	0.000940852	0.0239953
ENSMUSG00000034656	Cacna1a	592.974	1.50615	0.413436	1.08603e-05	0.000801202
ENSMUSG00000110529	NA	59.8343	1.49383	0.903914	0.00210239	0.0422851
ENSMUSG00000021306	Gpr137b	596.884	1.48359	0.270343	2.02902e-09	5.9875e-07
ENSMUSG00000103883	NA	216.327	1.47835	0.456858	4.78345e-05	0.00272109
ENSMUSG00000092526	NA	532.957	1.47508	0.413291	1.46188e-05	0.00103405
ENSMUSG00000037411	Serpine1	400.69	1.4747	0.361292	1.99281e-06	0.000206793
ENSMUSG00000030789	Itgax	657.784	1.45354	0.406229	1.62484e-05	0.00113654
ENSMUSG00000112148	Lilrb4a	3656.01	1.44336	0.250473	4.30992e-10	1.62794e-07
ENSMUSG00000034855	Cxcl10	267.551	1.43459	0.509084	0.000175366	0.00724054
ENSMUSG00000102196	NA	135.618	1.42994	0.723119	0.00126808	0.0298616
ENSMUSG00000087721	NA	95.1298	1.4278	0.67723	0.00102368	0.025573
ENSMUSG00000098108	NA	254.199	1.41927	0.436117	4.70443e-05	0.00269236
ENSMUSG00000051611	Olfr112	153.097	1.419	0.574966	0.00045687	0.0146493
ENSMUSG00000056215	Lrguk	875.377	1.41631	0.378346	7.9524e-06	0.000623191
ENSMUSG00000102305	NA	145.904	1.41353	0.471179	0.000109294	0.00518056
ENSMUSG00000024030	Abcg1	2815.9	1.41131	0.5107	0.000202178	0.00798817
ENSMUSG00000107841	NA	205.842	1.40809	0.518841	0.000241271	0.0091499
ENSMUSG00000050370	Ch25h	326.88	1.40651	0.516126	0.000231062	0.0088696
ENSMUSG00000089035	LOC115488265	91.9374	1.40401	0.790372	0.00185308	0.0386374
ENSMUSG00000034993	Vat1	336.126	1.39703	0.507647	0.000216689	0.00842057
ENSMUSG00000103984	NA	124.754	1.39283	0.517656	0.000271123	0.00996194
ENSMUSG00000070047	Fat1	548.076	1.3866	0.342597	2.45114e-06	0.00023862
ENSMUSG00000029419	Ajm1	325.456	1.38525	0.389366	1.67483e-05	0.00115441
ENSMUSG00000033350	Chst2	1422.5	1.37906	0.391914	1.90394e-05	0.00127964
ENSMUSG00000054939	Zfp174	317.72	1.37876	0.387202	1.66815e-05	0.00115441
ENSMUSG00000103151	NA	927.061	1.37605	0.288379	9.33391e-08	1.67886e-05
ENSMUSG00000019823	Mical1	230.155	1.37487	0.481185	0.000167719	0.00699235
ENSMUSG00000045092	S1pr1	1000.06	1.37381	0.312009	5.41598e-07	7.05422e-05
ENSMUSG00000104940	NA	109.737	1.36786	0.620362	0.000886811	0.023165
ENSMUSG00000109722	Gm10578	105.534	1.34127	0.668101	0.00134617	0.0308358
ENSMUSG00000093979	Gm2237	178.347	1.33651	0.583049	0.000737782	0.020521
ENSMUSG00000042622	Maff	113.752	1.32667	0.811012	0.0024267	0.0465538
ENSMUSG00000029027	Dffb	169.857	1.32543	0.447651	0.000132902	0.00594317
ENSMUSG00000090622	A930033H14Rik	247.101	1.32084	0.392918	3.61206e-05	0.00217253
ENSMUSG00000083306	NA	114.359	1.31963	0.767187	0.0021796	0.0436058
ENSMUSG00000112669	NA	78.7638	1.31343	0.573065	0.000812573	0.0217685
ENSMUSG00000041440	Gk5	142.031	1.30679	0.778356	0.0023044	0.0451164
ENSMUSG00000052013	Btla	200.949	1.30413	0.532705	0.000530572	0.0164267
ENSMUSG00000053164	Gpr21	279.544	1.30013	0.450273	0.000164547	0.00687531
ENSMUSG00000087231	E230016M11Rik	132.596	1.2983	0.550199	0.000674866	0.0192822
ENSMUSG00000114864	NA	264.983	1.29823	0.777576	0.00229573	0.0450699
ENSMUSG00000031802	Phxr4	524.965	1.29726	0.57793	0.000826329	0.0220424
ENSMUSG00000041362	Shtn1	194.396	1.29534	0.547603	0.000652156	0.018804
ENSMUSG00000115184	NA	154.643	1.29418	0.792121	0.00247587	0.0469224
ENSMUSG00000111030	NA	270.248	1.28773	0.439452	0.000149956	0.00645119
ENSMUSG00000038456	Dennd2a	361.21	1.28214	0.350487	1.29304e-05	0.000923768
ENSMUSG00000027698	Nceh1	1145.96	1.27684	0.369128	2.58913e-05	0.00164641
ENSMUSG00000113216	NA	232.495	1.27081	0.490801	0.00038664	0.0128785
ENSMUSG00000084519	NA	239.83	1.26651	0.361979	2.37169e-05	0.00152353
ENSMUSG00000026207	Speg	573.281	1.2485	0.305339	2.37116e-06	0.000234376
ENSMUSG00000086288	NA	107.842	1.24506	0.714686	0.00232363	0.0452399
ENSMUSG00000089809	A930011G23Rik	708.874	1.24276	0.367657	3.56534e-05	0.00215128
ENSMUSG00000077394	LOC115487283	164.011	1.23599	0.711375	0.00230454	0.0451164
ENSMUSG00000102202	NA	264.129	1.2312	0.740957	0.00253791	0.0475978
ENSMUSG00000085566	NA	244.148	1.22486	0.407408	0.000126578	0.00577936
ENSMUSG00000110504	NA	237.536	1.21886	0.423849	0.000188366	0.00760146
ENSMUSG00000025473	Adam8	315.951	1.21809	0.55585	0.00103405	0.0257299
ENSMUSG00000114576	NA	108.977	1.21135	0.608766	0.00162372	0.034887
ENSMUSG00000058163	Gm5431	565.958	1.21084	0.43962	0.000262168	0.00972752
ENSMUSG00000032750	Gab3	378.633	1.1992	0.373874	6.82441e-05	0.00365116
ENSMUSG00000036411	9530077C05Rik	155.707	1.1965	0.667257	0.00225128	0.0446146
ENSMUSG00000048232	Fbxo10	187.478	1.19626	0.482806	0.000572828	0.017393
ENSMUSG00000104094	NA	152.3	1.19538	0.705838	0.00260095	0.0482349
ENSMUSG00000030577	Cd22	404.447	1.1818	0.508257	0.00080546	0.0217003
ENSMUSG00000030330	Ing4	378.037	1.17621	0.421877	0.00025162	0.00939149
ENSMUSG00000006219	Fblim1	678.195	1.16423	0.513664	0.000931156	0.0238938
ENSMUSG00000043542	Zc2hc1a	168.309	1.16274	0.51083	0.000954843	0.0242707
ENSMUSG00000039089	L3mbtl3	659.92	1.15811	0.281437	2.33656e-06	0.000232254
ENSMUSG00000027487	Cdk5rap1	371.341	1.14908	0.536527	0.00125334	0.0295883
ENSMUSG00000028494	Plin2	762.504	1.14133	0.432436	0.000390511	0.0129617
ENSMUSG00000022010	Tsc22d1	389.817	1.14121	0.322686	2.36239e-05	0.00152274
ENSMUSG00000102662	NA	313.207	1.14097	0.392533	0.000188253	0.00760146
ENSMUSG00000030657	Xylt1	1125.04	1.1374	0.234234	7.87237e-08	1.45762e-05
ENSMUSG00000102448	NA	652.725	1.13565	0.334378	3.84403e-05	0.00227581
ENSMUSG00000114696	NA	187.73	1.13505	0.544936	0.00147124	0.0324223
ENSMUSG00000061666	Gdpd1	142.92	1.13391	0.45328	0.00059316	0.0177535
ENSMUSG00000109203	NA	723.324	1.12994	0.455128	0.000591661	0.0177407
ENSMUSG00000096780	NA	475.65	1.12711	0.315406	2.08531e-05	0.00138186
ENSMUSG00000021238	Aldh6a1	441.617	1.11538	0.306489	1.66879e-05	0.00115441
ENSMUSG00000030323	Ift122	183.25	1.10135	0.512913	0.0013628	0.030863
ENSMUSG00000117372	NA	151.656	1.09961	0.620828	0.00269148	0.0492074
ENSMUSG00000091985	NA	432.694	1.08056	0.308616	2.90256e-05	0.00181516
ENSMUSG00000000386	Mx1	768.437	1.07949	0.351035	0.000120344	0.00558431
ENSMUSG00000092274	Neat1	6428.82	1.07925	0.365741	0.000175509	0.00724054
ENSMUSG00000056313	Tcim	639.71	1.06149	0.318575	5.35994e-05	0.0029795
ENSMUSG00000105881	NA	209.505	1.05736	0.557772	0.00233245	0.0453197
ENSMUSG00000112023	Lilr4b	2564.46	1.05241	0.252814	2.20327e-06	0.000221335
ENSMUSG00000050708	Ftl1	420.909	1.0478	0.385316	0.00036626	0.012441
ENSMUSG00000021684	Pde8b	434.124	1.04433	0.363581	0.000238136	0.00906742
ENSMUSG00000033948	Zswim5	329.87	1.04336	0.429445	0.000781441	0.0212044
ENSMUSG00000105748	NA	852.91	1.03918	0.42823	0.000779773	0.0212044
ENSMUSG00000056698	Elmod3	222.554	1.03737	0.45757	0.00116202	0.0280281
ENSMUSG00000089940	NA	306.864	1.03734	0.381379	0.000374867	0.0125974
ENSMUSG00000032352	Lrrc1	163.251	1.03268	0.526333	0.00218855	0.0436462
ENSMUSG00000046223	Plaur	310.19	1.03041	0.55344	0.00255957	0.0478614
ENSMUSG00000026170	Cyp27a1	839.908	1.02814	0.395645	0.000477072	0.0151683
ENSMUSG00000104966	NA	264.007	1.02631	0.368102	0.000317087	0.0112355
ENSMUSG00000060441	Trim5	519.899	1.02354	0.305065	5.26879e-05	0.0029444
ENSMUSG00000102277	NA	590.285	1.02095	0.432013	0.000941467	0.0239953
ENSMUSG00000103948	4930594C11Rik	1059.78	0.993683	0.268603	1.57639e-05	0.00110675
ENSMUSG00000086753	NA	262.282	0.990166	0.365207	0.000418697	0.0137175
ENSMUSG00000028864	Hgf	974.273	0.989677	0.278119	2.69469e-05	0.00170207
ENSMUSG00000023019	Gpd1	187.954	0.985954	0.480296	0.0020023	0.0408374
ENSMUSG00000031342	Gpm6b	243.969	0.976142	0.380017	0.00062897	0.0183122
ENSMUSG00000038375	Trp53inp2	742.536	0.966898	0.270866	2.67838e-05	0.00169744
ENSMUSG00000004891	Nes	1858.75	0.966605	0.485487	0.00226318	0.0448016
ENSMUSG00000073492	NA	1638.63	0.965667	0.255554	1.20832e-05	0.000874339
ENSMUSG00000109751	NA	349.653	0.9579	0.363972	0.0005503	0.0168171
ENSMUSG00000034771	Tle2	139.545	0.957727	0.443513	0.00173216	0.0365925
ENSMUSG00000089651	NA	259.46	0.952675	0.442022	0.0017138	0.0363671
ENSMUSG00000070883	Ccdc173	201.128	0.952259	0.483167	0.00247705	0.0469224
ENSMUSG00000062901	Klhl24	5609.13	0.945378	0.348409	0.000439572	0.014191
ENSMUSG00000117964	NA	468.363	0.942513	0.383042	0.000861446	0.0226908
ENSMUSG00000107023	NA	269.967	0.942044	0.339863	0.000384799	0.0128398
ENSMUSG00000000276	Dgke	218.54	0.930287	0.460796	0.00235969	0.0457546
ENSMUSG00000014599	Csf1	3640.95	0.922464	0.388118	0.00108805	0.0267215
ENSMUSG00000035158	Mitf	1856.34	0.917581	0.283535	9.3818e-05	0.00473713
ENSMUSG00000061175	Fnip2	2467.04	0.913828	0.2496	2.07549e-05	0.0013802
ENSMUSG00000041695	Kcnj2	5973.02	0.911881	0.281825	9.56432e-05	0.00476925
ENSMUSG00000030649	Anapc15	571.496	0.911459	0.295376	0.00015632	0.00667932
ENSMUSG00000079143	NA	352.445	0.90559	0.42823	0.00203999	0.0414717
ENSMUSG00000034593	Myo5a	6571.64	0.895105	0.199925	6.96459e-07	8.59695e-05
ENSMUSG00000025486	Sirt3	281.011	0.884307	0.364325	0.0010688	0.0263173
ENSMUSG00000103382	NA	711.515	0.881128	0.230615	1.22076e-05	0.000879971
ENSMUSG00000108455	NA	751.869	0.866661	0.271996	0.000123377	0.00568315
ENSMUSG00000112637	NA	252.444	0.861155	0.380439	0.00165719	0.0354046
ENSMUSG00000034652	Cd300a	951.849	0.860812	0.392629	0.0018575	0.0386374
ENSMUSG00000033624	Pdpr	1248.92	0.859033	0.210846	4.46052e-06	0.000406759
ENSMUSG00000103972	NA	326.975	0.858248	0.319636	0.000575392	0.0174232
ENSMUSG00000106592	NA	316.728	0.854663	0.389861	0.00195138	0.040085
ENSMUSG00000052534	Pbx1	760.607	0.853401	0.375542	0.00162296	0.034887
ENSMUSG00000054942	Miga1	971.269	0.851844	0.273142	0.000163173	0.0068482
ENSMUSG00000041935	AW549877	5474.65	0.844716	0.283215	0.000242175	0.00916575
ENSMUSG00000015243	Abca1	16733.4	0.843294	0.314484	0.000591794	0.0177407
ENSMUSG00000039316	Rftn1	596.697	0.843086	0.256759	0.000100963	0.004887
ENSMUSG00000026018	Ica1l	754.704	0.842305	0.368234	0.00160374	0.0347343
ENSMUSG00000102419	NA	532.651	0.839964	0.355151	0.00135422	0.0308358
ENSMUSG00000029207	Apbb2	3612.28	0.834569	0.277334	0.000232968	0.00892461
ENSMUSG00000021271	Zfp839	1392.02	0.828488	0.304455	0.000549893	0.0168171
ENSMUSG00000103851	NA	1213.06	0.818961	0.369049	0.00197862	0.0404856
ENSMUSG00000034858	Fam214a	2445.97	0.813752	0.295058	0.000511939	0.0159283
ENSMUSG00000032534	Cep63	1611.78	0.80968	0.297392	0.00061698	0.0180974
ENSMUSG00000062604	Srpk2	2556.37	0.809306	0.23913	6.04214e-05	0.00331721
ENSMUSG00000042249	Grk3	1228.57	0.800578	0.303461	0.000740232	0.0205287
ENSMUSG00000019850	Tnfaip3	1464.37	0.789913	0.282324	0.000485232	0.0153502
ENSMUSG00000024766	Lipo3	514.168	0.778778	0.346445	0.00207762	0.0419658
ENSMUSG00000040998	Npnt	3101.2	0.777006	0.311265	0.00113614	0.0275445
ENSMUSG00000025203	Scd2	1319.74	0.775687	0.323532	0.0014692	0.0324152
ENSMUSG00000019977	Hbs1l	838.903	0.764955	0.262326	0.000367916	0.0124545
ENSMUSG00000026213	Stk11ip	628.552	0.743461	0.312601	0.00168081	0.0357475
ENSMUSG00000105842	NA	1592.06	0.736475	0.224964	0.000124871	0.00572404
ENSMUSG00000025969	Nrp2	4225.31	0.729823	0.33032	0.0024244	0.0465538
ENSMUSG00000021028	Mbip	884.705	0.728048	0.309367	0.00185761	0.0386374
ENSMUSG00000001542	Ell2	3266.77	0.727043	0.301549	0.00162607	0.0348977
ENSMUSG00000029298	Gbp9	1101.28	0.724931	0.29306	0.00139272	0.0312972
ENSMUSG00000024781	Lipa	3727.63	0.719807	0.21739	0.000116625	0.00545194
ENSMUSG00000040268	Plekha1	4430.67	0.710087	0.260917	0.000741871	0.020544
ENSMUSG00000035356	Nfkbiz	1755.71	0.706943	0.282275	0.00134836	0.0308358
ENSMUSG00000044042	Fmn1	1583.76	0.702268	0.296271	0.0019226	0.0397268
ENSMUSG00000024299	Adamts10	1770	0.69796	0.246317	0.000523018	0.0162196
ENSMUSG00000055480	Zfp458	441.163	0.693431	0.270538	0.00122903	0.0291968
ENSMUSG00000019876	Pkib	2609.64	0.690515	0.263636	0.00104344	0.0258615
ENSMUSG00000023980	Taf8	605.163	0.689312	0.280287	0.00161645	0.0348496
ENSMUSG00000044712	Slc38a6	1314.18	0.688073	0.259333	0.00100006	0.0250825
ENSMUSG00000027522	Stx16	4916.4	0.687826	0.247574	0.000679153	0.0193753
ENSMUSG00000021109	Hif1a	4120.39	0.685705	0.170596	8.59111e-06	0.00065689
ENSMUSG00000009905	Kdsr	1141.73	0.684142	0.270019	0.00135332	0.0308358
ENSMUSG00000073490	Ifi207	2395.11	0.682468	0.291267	0.00218461	0.0436438
ENSMUSG00000026456	Cyb5r1	806.584	0.661749	0.248707	0.00103177	0.025707
ENSMUSG00000032565	Nudt16	400.141	0.659119	0.283035	0.00247258	0.0469224
ENSMUSG00000026594	Ralgps2	1575.53	0.649172	0.194116	0.000130724	0.00586426
ENSMUSG00000068245	Phf11d	1028.11	0.645982	0.256475	0.00157266	0.0341485
ENSMUSG00000040852	Plekhh2	998.442	0.643924	0.270936	0.00229105	0.0450248
ENSMUSG00000032067	Pts	2457.48	0.638092	0.24468	0.00128188	0.030074
ENSMUSG00000021939	Ctsb	45155.5	0.632999	0.215267	0.000522791	0.0162196
ENSMUSG00000103509	NA	1274.19	0.632963	0.244559	0.00138343	0.0312156
ENSMUSG00000026483	Fam129a	3096.13	0.630712	0.247313	0.00154539	0.0337412
ENSMUSG00000041132	N4bp2l1	1515.47	0.61619	0.248261	0.00167755	0.0357183
ENSMUSG00000036473	Tbc1d24	843.917	0.61456	0.23343	0.0013036	0.0303573
ENSMUSG00000015697	Setdb1	2708.33	0.611859	0.194786	0.000282302	0.0102773
ENSMUSG00000035164	Zc3h12c	2169.69	0.60485	0.212293	0.000722077	0.0202934
ENSMUSG00000024826	Dpf2	1453.97	0.599212	0.230041	0.0014394	0.0319312
ENSMUSG00000028016	Ints12	1889.88	0.577757	0.214778	0.00125762	0.0296523
ENSMUSG00000003161	Sri	1732.24	0.577043	0.197912	0.000650661	0.018804
ENSMUSG00000078942	Naip6	5884.8	0.56806	0.203636	0.000878501	0.0230436
ENSMUSG00000095123	NA	1391.64	0.565336	0.225788	0.00218612	0.0436438
ENSMUSG00000038301	Snx10	3786.28	0.55567	0.208965	0.00148913	0.032702
ENSMUSG00000055782	Abcd2	5752.15	0.54683	0.195301	0.00103145	0.025707
ENSMUSG00000024174	Pot1b	2343.93	0.546233	0.202333	0.00139299	0.0312972
ENSMUSG00000104369	NA	3383.58	0.545378	0.198672	0.00122044	0.0290292
ENSMUSG00000037266	Rsrp1	22490.1	0.522223	0.191056	0.00138033	0.0312156
ENSMUSG00000022019	Tdrd3	1086.8	0.52083	0.207495	0.00257909	0.0480361
ENSMUSG00000036499	Eea1	5434.09	0.513014	0.202235	0.0024737	0.0469224
ENSMUSG00000020097	Sgpl1	3765.12	0.481524	0.186196	0.00250557	0.0471317
ENSMUSG00000060657	Marf1	8368.08	0.474845	0.181533	0.00237756	0.0458897
ENSMUSG00000042784	Muc1	53.7826	0.140597	0.365336	0.00263049	0.0484205
ENSMUSG00000001349	Cnn1	37.5981	0.139567	0.364739	0.00245315	0.0467982
ENSMUSG00000109873	NA	12.6365	0.127642	0.357662	0.000667923	0.0191417
ENSMUSG00000027690	Slc2a2	23.4298	0.125712	0.356112	0.00232385	0.0452399
ENSMUSG00000093956	LOC115487688	11.3703	0.123964	0.355226	0.000935474	0.0239395
ENSMUSG00000032174	Icam5	10.3809	0.123736	0.354961	0.0011723	0.0282398
ENSMUSG00000031098	Syt8	12.3093	0.116874	0.351106	0.00090678	0.0234595
ENSMUSG00000028031	Dkk2	10.4629	0.116442	0.350681	0.00133413	0.0306204
ENSMUSG00000031297	Slc7a3	21.7971	0.115845	0.350571	0.0026567	0.0486658
ENSMUSG00000045065	NA	19.0477	0.109256	0.34722	0.000368635	0.0124545
ENSMUSG00000114414	NA	17.2284	0.109183	0.347117	0.000478601	0.0151914
ENSMUSG00000032021	Crtam	27.3923	0.099815	0.342525	0.000196208	0.00783422
ENSMUSG00000027834	Serpini1	27.7351	0.0976202	0.341212	0.00233668	0.0453551
ENSMUSG00000107406	NA	10.1842	0.0970244	0.340654	0.00226784	0.0448016
ENSMUSG00000062170	Fmr1nb	30.2983	0.0949073	0.340215	0.000180833	0.00740827
ENSMUSG00000111465	NA	13.4647	0.0934012	0.339194	0.00135248	0.0308358
ENSMUSG00000051323	Pcdh19	11.9515	0.0925272	0.338737	0.00182108	0.0382144
ENSMUSG00000092413	Olfr115	22.102	0.0901663	0.337986	0.00047994	0.0152083
ENSMUSG00000088984	LOC115486291	13.4584	0.0871836	0.336514	0.00165662	0.0354046
ENSMUSG00000108075	NA	29.8599	0.0869063	0.336669	0.000260997	0.00972226
ENSMUSG00000044719	E230025N22Rik	11.5099	0.0863345	0.336081	0.00237456	0.0458897
ENSMUSG00000034765	Dusp5	21.618	0.085058	0.335819	0.000615605	0.0180974
ENSMUSG00000043085	Tmem82	16.8812	0.0824099	0.334675	0.0011996	0.0286781
ENSMUSG00000046080	Clec9a	14.8648	0.0820346	0.334477	0.00160723	0.03477
ENSMUSG00000112381	NA	12.0112	0.0800052	0.333607	0.00271623	0.049564
ENSMUSG00000052613	Pcdh15	20.4757	0.0795421	0.333622	0.00088182	0.0230665
ENSMUSG00000082812	NA	20.8077	0.0782737	0.333148	0.000893221	0.0232681
ENSMUSG00000058921	Slc10a5	18.7448	0.0769575	0.332632	0.00119952	0.0286781
ENSMUSG00000083173	NA	22.6739	0.0767345	0.332598	0.000793307	0.0214648
ENSMUSG00000057337	Chst3	19.1471	0.0757667	0.332205	0.00119658	0.0286781
ENSMUSG00000027562	Car2	16.8127	0.067633	0.329407	0.00224454	0.0445744
ENSMUSG00000045589	Frrs1l	17.1434	0.0675779	0.329394	0.00217532	0.0435664
ENSMUSG00000115107	NA	16.6352	0.0670276	0.329213	0.00236269	0.0457659
ENSMUSG00000106639	NA	18.5722	0.0667375	0.329144	0.00192252	0.0397268
ENSMUSG00000011034	Slc5a1	13.9102	-0.0830134	0.335093	0.00194174	0.039991
ENSMUSG00000085982	9530051G07Rik	14.1107	-0.0834836	0.335285	0.00184769	0.0386012
ENSMUSG00000103965	Gm30173	14.5726	-0.0855654	0.336144	0.00156576	0.0340679
ENSMUSG00000058400	Qrfpr	17.2221	-0.0951048	0.340382	0.000694646	0.0197232
ENSMUSG00000111601	NA	17.07	-0.111691	0.348613	0.000993195	0.0249767
ENSMUSG00000029369	Afm	8.429	-0.119618	0.353073	0.00115498	0.0279296
ENSMUSG00000028602	Tnfrsf8	8.5946	-0.122239	0.354673	0.00101406	0.0253999
ENSMUSG00000099825	1810012K16Rik	13.9788	-0.130569	0.35947	0.00245153	0.0467982
ENSMUSG00000109904	NA	10.9549	-0.136206	0.364041	0.000365182	0.0124267
ENSMUSG00000082199	NA	21.3022	-0.145991	0.371152	0.000562233	0.0171264
ENSMUSG00000069306	Hist1h4m	9.37597	-0.149448	0.373058	0.00119136	0.0285897
ENSMUSG00000032899	Styk1	12.8413	-0.159606	0.382424	0.000116552	0.00545194
ENSMUSG00000110170	NA	28.747	-0.167379	0.389424	0.000155114	0.00664283
ENSMUSG00000112716	4930471E19Rik	12.5767	-0.171085	0.391152	0.00121641	0.0289699
ENSMUSG00000097503	3110045C21Rik	14.6489	-0.17789	0.397314	0.00146322	0.0323968
ENSMUSG00000019906	Lin7a	13.6782	-0.188248	0.409653	0.000198748	0.00791888
ENSMUSG00000026888	Grb14	17.5154	-0.201408	0.423217	0.000597884	0.0178115
ENSMUSG00000111039	NA	22.7634	-0.212747	0.433629	0.0026264	0.0484205
ENSMUSG00000114715	NA	11.8407	-0.223801	0.453169	0.000157945	0.00671837
ENSMUSG00000035246	Pcyt1b	27.8226	-0.232894	0.469277	9.31499e-06	0.000709367
ENSMUSG00000069309	Hist1h2an	11.1074	-0.253061	0.490079	0.00208726	0.0420704
ENSMUSG00000064361	NA	11.5654	-0.27352	0.535951	0.000348668	0.0121047
ENSMUSG00000115812	NA	33.9969	-0.344288	0.722471	0.000855804	0.0225736
ENSMUSG00000108929	Cc2d2b	14.4568	-0.410826	1.10107	0.000753966	0.0206968
ENSMUSG00000031785	Adgrg1	6993.13	-0.515031	0.188601	0.00141964	0.0316544
ENSMUSG00000024542	Cep192	5881.15	-0.532616	0.198723	0.0016487	0.0353031
ENSMUSG00000035202	Lars2	1548.73	-0.538441	0.192485	0.00124679	0.0295445
ENSMUSG00000024349	Tmem173	7483.96	-0.546308	0.186478	0.000789657	0.0213967
ENSMUSG00000030879	Mrpl17	1281.53	-0.548997	0.215508	0.00242113	0.0465538
ENSMUSG00000036202	Rif1	4270.7	-0.550074	0.199483	0.00134899	0.0308358
ENSMUSG00000029810	Tmem176b	7519.03	-0.552737	0.204991	0.0016187	0.0348584
ENSMUSG00000027367	Stard7	1452.61	-0.567758	0.208607	0.00141868	0.0316544
ENSMUSG00000032386	Trip4	1631.62	-0.574263	0.207599	0.00121532	0.0289699
ENSMUSG00000018583	G3bp1	1806.1	-0.581778	0.234557	0.00261871	0.0483923
ENSMUSG00000025607	Copg2	1828.07	-0.582725	0.205984	0.00098366	0.024869
ENSMUSG00000045411	2410002F23Rik	704.985	-0.586521	0.231116	0.00222648	0.0443091
ENSMUSG00000036810	Cnep1r1	2218.4	-0.593286	0.236978	0.0023972	0.0461975
ENSMUSG00000027540	Ptpn1	4816.72	-0.613845	0.240394	0.00198401	0.040552
ENSMUSG00000038690	Atp5j2	1274.33	-0.632504	0.261086	0.00264227	0.0484956
ENSMUSG00000038762	Abcf1	1799.42	-0.63454	0.247422	0.00181408	0.0381097
ENSMUSG00000047250	Ptgs1	19310.1	-0.636735	0.193639	0.000207617	0.00811813
ENSMUSG00000031527	Eri1	1789.56	-0.649637	0.271709	0.00272938	0.049708
ENSMUSG00000032601	Prkar2a	1145	-0.652077	0.228405	0.000750825	0.0206707
ENSMUSG00000024370	Cdc23	1302.02	-0.658601	0.203722	0.000220297	0.00850824
ENSMUSG00000029048	Rer1	2356.41	-0.661543	0.241373	0.00105933	0.0262208
ENSMUSG00000026662	Sephs1	935.851	-0.663814	0.24855	0.00125002	0.0295468
ENSMUSG00000024273	2700062C07Rik	539.869	-0.664723	0.25392	0.00144051	0.0319312
ENSMUSG00000015461	Atf6b	764.251	-0.666672	0.276766	0.00249	0.0469506
ENSMUSG00000060149	BC002059	962.451	-0.666832	0.243431	0.00101976	0.0255089
ENSMUSG00000003644	Rps6ka1	4124.22	-0.666925	0.209985	0.000249353	0.00934383
ENSMUSG00000040945	Rcc2	1128.77	-0.667646	0.281855	0.0027195	0.0495758
ENSMUSG00000035125	Gcfc2	762.053	-0.669143	0.245033	0.00103826	0.0258007
ENSMUSG00000027959	Sass6	1430.2	-0.669873	0.282284	0.00261076	0.04834
ENSMUSG00000017221	Psmd3	841.547	-0.672838	0.265814	0.00178485	0.0376213
ENSMUSG00000015745	Plekho1	6390.1	-0.680373	0.236438	0.000656883	0.0188826
ENSMUSG00000041219	Arhgap11a	2680.93	-0.684631	0.203395	0.000129821	0.00585153
ENSMUSG00000035735	Dagla	1383.08	-0.693368	0.244845	0.000729924	0.0203624
ENSMUSG00000006435	Neurl1a	1706.48	-0.696367	0.246562	0.000744582	0.0205587
ENSMUSG00000044496	2510039O18Rik	1498.36	-0.698408	0.291891	0.00232361	0.0452399
ENSMUSG00000057706	Mex3b	489.829	-0.707561	0.28955	0.00205434	0.041629
ENSMUSG00000042271	Nxt2	1480.63	-0.708153	0.240072	0.000493126	0.0154447
ENSMUSG00000051786	Tubgcp6	750.324	-0.718731	0.269365	0.00110108	0.0269017
ENSMUSG00000054808	Actn4	2008.47	-0.72027	0.305277	0.00246203	0.0469201
ENSMUSG00000037419	Endod1	1858.56	-0.723815	0.291212	0.00184223	0.0385725
ENSMUSG00000013089	Etv5	1258.88	-0.727514	0.23871	0.000344967	0.0120649
ENSMUSG00000021607	Mrpl36	812.271	-0.728271	0.280043	0.0012936	0.0302362
ENSMUSG00000047832	Cdca4	883.836	-0.73038	0.311396	0.00250103	0.0470931
ENSMUSG00000029860	Zyx	2321.58	-0.730442	0.220384	0.000141834	0.00620942
ENSMUSG00000022248	Rad1	387.18	-0.731051	0.300552	0.00199274	0.0406864
ENSMUSG00000066979	Bub3	1664.34	-0.73612	0.251005	0.000491714	0.0154261
ENSMUSG00000026176	Ctdsp1	560.156	-0.736321	0.261205	0.000684694	0.019504
ENSMUSG00000052997	Uba2	1747.27	-0.736322	0.291823	0.0015764	0.0341812
ENSMUSG00000029253	Cenpc1	2077.24	-0.736938	0.293086	0.00161497	0.0348496
ENSMUSG00000028433	Ubap2	1427.28	-0.741877	0.219742	0.00011141	0.00524711
ENSMUSG00000006390	Elovl1	1716.42	-0.753948	0.309411	0.00187329	0.0388683
ENSMUSG00000005354	Txn2	432.809	-0.756475	0.281125	0.000952328	0.0242394
ENSMUSG00000024764	Naa40	1327.46	-0.760614	0.278145	0.000839708	0.0222626
ENSMUSG00000030726	Pold3	1401.96	-0.765057	0.246606	0.000267966	0.00992316
ENSMUSG00000057406	Nsd2	7051.55	-0.765073	0.316544	0.00183729	0.0385117
ENSMUSG00000021886	Gpr65	1336.48	-0.766845	0.269225	0.000594814	0.0177748
ENSMUSG00000030654	Arl6ip1	3775.2	-0.769768	0.235783	0.000156722	0.00668136
ENSMUSG00000109324	Prmt1	529.057	-0.769902	0.277331	0.000725733	0.0203356
ENSMUSG00000034118	Tpst1	777.981	-0.769925	0.263601	0.000471636	0.0150208
ENSMUSG00000033055	Ankrd54	330.287	-0.771426	0.334251	0.00249097	0.0469506
ENSMUSG00000029726	Mepce	1114.52	-0.771428	0.305832	0.00146706	0.0324056
ENSMUSG00000036968	Cnpy4	631.072	-0.772339	0.330377	0.00232595	0.0452399
ENSMUSG00000071637	Cebpd	1451.01	-0.77431	0.287955	0.00092448	0.0237655
ENSMUSG00000055850	Rnf181	868.72	-0.776025	0.314454	0.00166611	0.0355549
ENSMUSG00000022844	Pdia5	624.132	-0.781062	0.344445	0.00264115	0.0484956
ENSMUSG00000029066	Mrpl20	465.895	-0.78562	0.293515	0.000939718	0.0239953
ENSMUSG00000035704	Alg8	2357.26	-0.786828	0.242411	0.000159574	0.0067724
ENSMUSG00000001151	Pcnt	2199.11	-0.787777	0.288252	0.000807332	0.0217198
ENSMUSG00000037408	Cnnm4	619.238	-0.793748	0.268102	0.000398751	0.0131888
ENSMUSG00000037447	Arid5a	1263.65	-0.80075	0.231164	7.27711e-05	0.00384973
ENSMUSG00000021606	Ndufs6	438.806	-0.803763	0.346635	0.00228811	0.0450248
ENSMUSG00000030091	Nup210	1266.46	-0.806593	0.347027	0.00224844	0.0446051
ENSMUSG00000027199	Gatm	7428.59	-0.808252	0.246435	0.000137039	0.00606502
ENSMUSG00000026434	Nucks1	2727.86	-0.810489	0.274082	0.000391877	0.0129842
ENSMUSG00000017756	Slc12a7	1083.83	-0.812194	0.319703	0.00128926	0.0302097
ENSMUSG00000027778	Ift80	861.94	-0.812317	0.326228	0.00147575	0.0324837
ENSMUSG00000003868	Ruvbl2	445.801	-0.817716	0.359736	0.0024849	0.0469506
ENSMUSG00000052833	Sae1	965.769	-0.818368	0.342881	0.0019353	0.0399018
ENSMUSG00000000339	Rtca	814.895	-0.818573	0.256174	0.000179317	0.00736213
ENSMUSG00000039298	Cdk5rap2	1698.23	-0.818871	0.306305	0.000891339	0.0232512
ENSMUSG00000035674	Ndufa3	807.627	-0.824103	0.353248	0.002135	0.0428335
ENSMUSG00000048109	Rbm15	1881.83	-0.825128	0.259053	0.000184231	0.00749867
ENSMUSG00000047921	Trappc9	728.511	-0.828195	0.262884	0.000204756	0.00805628
ENSMUSG00000051329	Nup160	1894.14	-0.830131	0.367425	0.00251819	0.0473219
ENSMUSG00000036432	Siah2	347.807	-0.832165	0.320657	0.00107187	0.0263585
ENSMUSG00000085208	Brip1os	1861.64	-0.83648	0.250117	0.00010628	0.0050687
ENSMUSG00000031157	Pqbp1	446.08	-0.836781	0.288695	0.000451622	0.0145304
ENSMUSG00000002733	Plekha3	435.138	-0.83861	0.368691	0.00244906	0.0467982
ENSMUSG00000021501	Caml	745.964	-0.843774	0.28946	0.000420547	0.0137175
ENSMUSG00000033596	Rfwd3	844.592	-0.844034	0.335369	0.00129634	0.0302629
ENSMUSG00000021385	Ippk	487.759	-0.853402	0.355994	0.00172841	0.036554
ENSMUSG00000053838	Nudcd3	1235.65	-0.861197	0.277425	0.000225085	0.00867543
ENSMUSG00000029430	Ran	1052.11	-0.86167	0.306703	0.000566244	0.0172207
ENSMUSG00000002524	Puf60	891.24	-0.867525	0.302186	0.000463692	0.0147927
ENSMUSG00000020785	Camkk1	407.463	-0.867896	0.381712	0.0022315	0.0443622
ENSMUSG00000065037	Rn7sk	6656.41	-0.86824	0.324969	0.000823886	0.0220084
ENSMUSG00000026814	Eng	1260.94	-0.868754	0.296514	0.000383268	0.0128113
ENSMUSG00000071652	Ints5	201.446	-0.869605	0.381256	0.00220702	0.0439681
ENSMUSG00000021993	Mipep	553.77	-0.87608	0.289953	0.000287324	0.0104354
ENSMUSG00000020267	Hint1	1543.47	-0.876569	0.399424	0.00270063	0.0493269
ENSMUSG00000025764	Jade1	1302.84	-0.877232	0.322395	0.000705631	0.0199798
ENSMUSG00000002221	Paxip1	1919.34	-0.87973	0.312418	0.000535517	0.0164973
ENSMUSG00000029414	Kntc1	2742.58	-0.883705	0.390197	0.00227571	0.0449101
ENSMUSG00000002297	Dbf4	976.875	-0.884572	0.40215	0.00262877	0.0484205
ENSMUSG00000032126	Hmbs	430.96	-0.884815	0.401143	0.00258842	0.0481257
ENSMUSG00000015806	Qdpr	339.73	-0.885355	0.383109	0.00202532	0.0412623
ENSMUSG00000078348	Sf3b5	536.477	-0.89522	0.403644	0.00246808	0.0469224
ENSMUSG00000022314	Rad21	4760.7	-0.897046	0.218775	5.15359e-06	0.000450606
ENSMUSG00000038607	Gng10	370.649	-0.900394	0.368124	0.0014179	0.0316544
ENSMUSG00000102844	NA	211.366	-0.912658	0.373921	0.00140099	0.0313869
ENSMUSG00000041736	Tspo	1200.55	-0.914623	0.420022	0.002645	0.0484985
ENSMUSG00000061360	Phf5a	679.314	-0.916801	0.347005	0.000830524	0.0220773
ENSMUSG00000027752	Exosc8	1540.02	-0.921432	0.35474	0.000902042	0.0234199
ENSMUSG00000054452	Tle5	550.17	-0.923675	0.401366	0.00195027	0.040085
ENSMUSG00000021377	Dek	4246.73	-0.92491	0.318606	0.000360338	0.0123509
ENSMUSG00000020483	Dynll2	848.315	-0.929189	0.318116	0.000364498	0.0124267
ENSMUSG00000050555	Hyls1	698.72	-0.930655	0.249357	2.18196e-05	0.00143584
ENSMUSG00000031838	NA	8484.82	-0.932684	0.289849	0.000140533	0.00618673
ENSMUSG00000023067	Cdkn1a	923.669	-0.935176	0.412071	0.00209015	0.0420838
ENSMUSG00000050312	Nsun3	1383.05	-0.938216	0.384871	0.00139367	0.0312972
ENSMUSG00000059409	Ppp2r5d	536.807	-0.941652	0.338204	0.000536341	0.0164973
ENSMUSG00000022678	Nde1	813.766	-0.941786	0.293524	0.000142945	0.00623476
ENSMUSG00000040236	Trappc5	404.64	-0.944789	0.40808	0.00187488	0.0388683
ENSMUSG00000005566	Trim28	1488.92	-0.945524	0.29287	0.000133452	0.0059443
ENSMUSG00000115902	NA	644.073	-0.945691	0.322696	0.000346132	0.0120721
ENSMUSG00000038963	Slco4a1	3104.24	-0.945899	0.286289	0.000100418	0.004887
ENSMUSG00000087598	Zfp111	927.178	-0.950236	0.362016	0.000840478	0.0222626
ENSMUSG00000027424	Mgme1	580.3	-0.951677	0.282998	8.29326e-05	0.0043267
ENSMUSG00000035171	1110059E24Rik	586.104	-0.952776	0.436914	0.00248825	0.0469506
ENSMUSG00000026238	Ptma	709.422	-0.957228	0.441007	0.00253292	0.0475515
ENSMUSG00000033904	Ccp110	1482.96	-0.960456	0.442836	0.00257802	0.0480361
ENSMUSG00000005374	Tbl2	1143.3	-0.961235	0.310127	0.000200182	0.00792587
ENSMUSG00000043445	Pgp	635.571	-0.961774	0.425721	0.00206246	0.0417041
ENSMUSG00000025499	Hras	281.724	-0.966042	0.449081	0.00259718	0.0482305
ENSMUSG00000059060	Rad51b	290.876	-0.966487	0.394052	0.00127545	0.0299779
ENSMUSG00000043091	Tuba1c	698.18	-0.967064	0.293046	0.000101435	0.004887
ENSMUSG00000037020	Wdr62	656.51	-0.968464	0.411356	0.00163297	0.035006
ENSMUSG00000003528	Slc25a1	232.869	-0.968531	0.352908	0.000577513	0.0174232
ENSMUSG00000015749	Anp32e	2048.46	-0.970701	0.241527	6.62606e-06	0.000551018
ENSMUSG00000023018	Smarcd1	325.924	-0.975262	0.317219	0.000211274	0.00822704
ENSMUSG00000032555	Topbp1	3275.39	-0.979235	0.399743	0.00133435	0.0306204
ENSMUSG00000059810	Rgs3	219.935	-0.980574	0.398109	0.00121226	0.0289439
ENSMUSG00000032666	1700025G04Rik	464.886	-0.98128	0.367725	0.000708869	0.0200415
ENSMUSG00000038070	Cntln	1444.58	-0.981393	0.315132	0.000181893	0.00743555
ENSMUSG00000028549	Itgb3bp	269.331	-0.984978	0.412635	0.00146494	0.0323968
ENSMUSG00000038374	Rbm8a	639.862	-0.985935	0.363618	0.000627201	0.0183122
ENSMUSG00000024098	Twsg1	632.898	-0.986458	0.249609	8.41177e-06	0.000651084
ENSMUSG00000025049	Taf5	1052.53	-0.987592	0.31847	0.000188156	0.00760146
ENSMUSG00000028690	Mmachc	418.332	-0.988377	0.363983	0.000615744	0.0180974
ENSMUSG00000026816	Gtf3c5	370.896	-0.991771	0.31222	0.000148692	0.00641141
ENSMUSG00000055184	Fam72a	797.2	-0.992677	0.371342	0.000692575	0.0196988
ENSMUSG00000022463	Srebf2	621.674	-0.995713	0.38491	0.000874376	0.0229673
ENSMUSG00000030929	Eri2	1069.79	-0.996534	0.249277	6.97126e-06	0.000570705
ENSMUSG00000016984	Etaa1	972.929	-0.997228	0.306764	0.000113788	0.00534577
ENSMUSG00000113902	Ndufb1-ps	875.779	-1.00339	0.441968	0.00196416	0.0402334
ENSMUSG00000041598	Cdc42ep4	256.441	-1.01656	0.45554	0.0020523	0.041629
ENSMUSG00000050213	Snip1	320.094	-1.01834	0.297687	6.20945e-05	0.00338236
ENSMUSG00000032478	Nme6	221.819	-1.01921	0.393118	0.000828128	0.0220593
ENSMUSG00000092118	Fancf	151.743	-1.02006	0.475242	0.00243566	0.0466531
ENSMUSG00000035024	Ncapd3	1898.24	-1.02081	0.309207	9.57083e-05	0.00476925
ENSMUSG00000029687	Ezh2	2197.42	-1.02367	0.308751	9.09463e-05	0.00464219
ENSMUSG00000056999	Ide	2838.89	-1.03268	0.308001	7.81013e-05	0.00411013
ENSMUSG00000105987	AI506816	2354.73	-1.03704	0.324315	0.00013834	0.00610439
ENSMUSG00000089991	NA	291.173	-1.04365	0.367403	0.000401713	0.0132404
ENSMUSG00000024142	Mlst8	281.978	-1.04444	0.422015	0.00110045	0.0269017
ENSMUSG00000019295	Tmem129	636.905	-1.04817	0.326492	0.000126689	0.00577936
ENSMUSG00000004880	Lbr	762.864	-1.04904	0.292102	3.27228e-05	0.00198715
ENSMUSG00000106106	NA	16538.8	-1.05284	0.263787	6.6813e-06	0.000551018
ENSMUSG00000026605	Cenpf	4956.4	-1.05374	0.357878	0.000295339	0.0106446
ENSMUSG00000029466	Anapc7	812.436	-1.06098	0.259561	4.47982e-06	0.000406759
ENSMUSG00000014294	Ndufa2	896.289	-1.0611	0.4425	0.00133294	0.0306204
ENSMUSG00000027067	Ssrp1	1878.7	-1.06233	0.341745	0.000174893	0.00724054
ENSMUSG00000033985	Tesk2	236.321	-1.06241	0.37473	0.000400152	0.013212
ENSMUSG00000035842	Ddx11	507.247	-1.06324	0.431278	0.00111799	0.0272443
ENSMUSG00000002833	Hdgfl2	412.934	-1.06387	0.442413	0.00129354	0.0302362
ENSMUSG00000098973	Mir6236	1140.88	-1.07675	0.340972	0.000145682	0.00632494
ENSMUSG00000037894	H2afz	449.885	-1.0833	0.455037	0.00135843	0.0308358
ENSMUSG00000041147	Brca2	2040.57	-1.08458	0.368764	0.00027858	0.0101944
ENSMUSG00000016252	Atp5e	1926.68	-1.08598	0.393589	0.000490702	0.0154261
ENSMUSG00000028560	Usp1	1459.39	-1.08651	0.351961	0.00018337	0.00747976
ENSMUSG00000030748	Il4ra	7372.29	-1.08675	0.291472	1.88366e-05	0.00127053
ENSMUSG00000038079	Tmem237	248.09	-1.08787	0.465912	0.00149334	0.0327563
ENSMUSG00000027242	Wdr76	637.68	-1.09502	0.483438	0.00176062	0.037152
ENSMUSG00000057388	Mrpl18	499.028	-1.09738	0.421713	0.000767375	0.0209431
ENSMUSG00000053293	Pom121	1941.68	-1.10076	0.226807	1.27457e-07	2.14255e-05
ENSMUSG00000026856	Dolpp1	410.169	-1.10155	0.299952	2.27753e-05	0.00147812
ENSMUSG00000112944	NA	264.479	-1.1043	0.388625	0.000380666	0.0127469
ENSMUSG00000098090	2700099C18Rik	426.257	-1.10638	0.464881	0.00132636	0.0306204
ENSMUSG00000024925	Rnaseh2c	335.266	-1.11152	0.53415	0.00258899	0.0481257
ENSMUSG00000030493	Faap24	254.457	-1.11599	0.458491	0.00114562	0.0277386
ENSMUSG00000024165	Jpt2	783.516	-1.11846	0.369945	0.000217674	0.00844145
ENSMUSG00000038046	Mrm3	101.339	-1.11897	0.505999	0.00190394	0.0394274
ENSMUSG00000034659	Tmem109	1224.55	-1.11927	0.45791	0.00111646	0.0272422
ENSMUSG00000051319	Mtln	400.894	-1.12379	0.360774	0.000161196	0.00678029
ENSMUSG00000028702	Rad54l	682.709	-1.12785	0.403705	0.000429673	0.013943
ENSMUSG00000090626	Tex9	339.964	-1.13099	0.413214	0.00050356	0.0156935
ENSMUSG00000074220	Zfp382	306.486	-1.13689	0.399771	0.000368484	0.0124545
ENSMUSG00000035293	G2e3	2527.33	-1.14687	0.244941	2.83872e-07	4.35522e-05
ENSMUSG00000002799	Jag2	253.631	-1.16034	0.549496	0.002319	0.0452399
ENSMUSG00000097971	NA	5702.67	-1.16187	0.357283	9.9834e-05	0.004887
ENSMUSG00000024537	Psmg2	569.278	-1.16233	0.314322	1.99103e-05	0.00132871
ENSMUSG00000020392	Cdkn2aipnl	814.388	-1.16303	0.346924	7.00389e-05	0.00372607
ENSMUSG00000007892	Rplp1	6514.92	-1.16447	0.358747	0.000103619	0.00497952
ENSMUSG00000050107	Haspin	905.963	-1.16714	0.396708	0.000269795	0.00995858
ENSMUSG00000031107	Rbmx2	178.192	-1.18016	0.437461	0.000538255	0.0165292
ENSMUSG00000070732	Rbm44	227.467	-1.18019	0.512449	0.00148738	0.0327015
ENSMUSG00000024944	Arl2	313.683	-1.18038	0.504397	0.00135669	0.0308358
ENSMUSG00000029413	Naaa	2982.23	-1.18299	0.399646	0.000261583	0.00972491
ENSMUSG00000032815	Fanca	493.766	-1.19066	0.446116	0.000586338	0.0176331
ENSMUSG00000030528	Blm	845.627	-1.19412	0.402541	0.00024581	0.00924776
ENSMUSG00000003420	Fcgrt	497.852	-1.20267	0.349262	4.96989e-05	0.00281866
ENSMUSG00000034880	Mrpl34	259.835	-1.20536	0.367589	8.75256e-05	0.00451641
ENSMUSG00000030641	Ddias	453.042	-1.20641	0.382812	0.000134496	0.00597671
ENSMUSG00000063810	Alms1	1512.78	-1.21013	0.402845	0.000220152	0.00850824
ENSMUSG00000021811	Dnajc9	872.493	-1.21364	0.539152	0.00167115	0.0356223
ENSMUSG00000036376	Abt1	178.372	-1.2238	0.49797	0.000984964	0.024869
ENSMUSG00000066441	Rdh11	454.921	-1.22813	0.298294	3.47632e-06	0.000333268
ENSMUSG00000030254	Rad18	391.917	-1.23541	0.459751	0.000541584	0.0166045
ENSMUSG00000001467	Cyp51	763.898	-1.24302	0.47108	0.000616924	0.0180974
ENSMUSG00000025403	Shmt2	492.893	-1.24487	0.483276	0.000727857	0.0203624
ENSMUSG00000031669	Gins3	273.693	-1.25173	0.543759	0.00143051	0.0317842
ENSMUSG00000051278	Zgrf1	1474.88	-1.26027	0.438938	0.000316288	0.0112282
ENSMUSG00000032397	Tipin	621.949	-1.26569	0.50865	0.000914001	0.0235817
ENSMUSG00000024181	Mrpl28	422.343	-1.26782	0.437524	0.000288679	0.0104645
ENSMUSG00000025507	Pidd1	519.775	-1.27044	0.507513	0.000866454	0.0227909
ENSMUSG00000048921	Zfp689	106.262	-1.2752	0.53569	0.00115857	0.0279805
ENSMUSG00000039640	Mrpl12	531.121	-1.27525	0.441298	0.000293108	0.0106047
ENSMUSG00000028438	Kif24	861.116	-1.27787	0.40476	0.000127557	0.00579095
ENSMUSG00000005732	Ranbp1	692.325	-1.27809	0.408889	0.000141291	0.00620563
ENSMUSG00000024525	Impa2	154.017	-1.27942	0.633884	0.00256568	0.0479024
ENSMUSG00000028896	Rcc1	627.564	-1.28173	0.397169	0.000100641	0.004887
ENSMUSG00000112406	NA	98.0673	-1.28657	0.571674	0.00155102	0.0338252
ENSMUSG00000030008	Pradc1	408.608	-1.28932	0.378699	5.39499e-05	0.00298797
ENSMUSG00000096916	Zfp850	191.824	-1.3016	0.537402	0.00104181	0.025855
ENSMUSG00000109511	Nup62	1052.47	-1.31111	0.465479	0.000360221	0.0123509
ENSMUSG00000110631	NA	705.777	-1.31523	0.413901	0.000117032	0.00545747
ENSMUSG00000022833	Ccdc14	314.891	-1.31636	0.522109	0.00080375	0.0216852
ENSMUSG00000029363	Rfc5	518.226	-1.31888	0.452922	0.000269977	0.00995858
ENSMUSG00000058290	Espl1	1398.75	-1.32148	0.294474	6.47777e-07	8.10193e-05
ENSMUSG00000026389	Steap3	130.492	-1.3251	0.556394	0.00112312	0.0273341
ENSMUSG00000007029	Vars	1192.77	-1.32636	0.385439	4.72274e-05	0.00269467
ENSMUSG00000023072	Cep89	468.366	-1.33033	0.341194	8.16766e-06	0.000637415
ENSMUSG00000020737	Jpt1	1263.87	-1.33277	0.34865	1.11433e-05	0.000818882
ENSMUSG00000036992	Nxt1	251.796	-1.33844	0.55652	0.00106313	0.026246
ENSMUSG00000033970	Rfc3	431.661	-1.35427	0.573583	0.00117847	0.0283522
ENSMUSG00000023004	Tuba1b	1640.6	-1.35442	0.394296	4.7027e-05	0.00269236
ENSMUSG00000041126	H2afv	673.407	-1.36315	0.443687	0.000160851	0.00678029
ENSMUSG00000024666	Tmem138	217.511	-1.36449	0.594007	0.0013584	0.0308358
ENSMUSG00000042745	Id1	167.806	-1.36456	0.66971	0.0023788	0.0458897
ENSMUSG00000008036	Ap2s1	564.979	-1.36991	0.404849	5.63327e-05	0.00310175
ENSMUSG00000033031	Cip2a	1395.03	-1.37188	0.370359	1.74642e-05	0.00119503
ENSMUSG00000020212	Mdm1	532.335	-1.37264	0.467444	0.000244015	0.00920503
ENSMUSG00000070639	Lrrc8b	694.285	-1.37298	0.571577	0.0010608	0.026223
ENSMUSG00000054115	Skp2	1470.96	-1.37429	0.320651	1.57316e-06	0.000169776
ENSMUSG00000062075	Lmnb2	292.448	-1.37696	0.479408	0.000295085	0.0106446
ENSMUSG00000030722	Nfatc2ip	395.358	-1.37962	0.396197	3.94664e-05	0.00232926
ENSMUSG00000037628	Cdkn3	487.263	-1.38235	0.430322	0.000101003	0.004887
ENSMUSG00000028633	Ctps	330.862	-1.38605	0.642537	0.00184444	0.0385759
ENSMUSG00000001525	Tubb5	7052.56	-1.39093	0.382817	2.27041e-05	0.00147812
ENSMUSG00000040195	1700012D01Rik	934.502	-1.39215	0.328705	1.95189e-06	0.000204796
ENSMUSG00000055675	Kbtbd11	139.438	-1.39259	0.573584	0.00096821	0.0245774
ENSMUSG00000038943	Prc1	2182.03	-1.39627	0.362389	9.6759e-06	0.000729812
ENSMUSG00000006398	Cdc20	394.424	-1.39931	0.409964	5.01333e-05	0.00282632
ENSMUSG00000057191	AB124611	1157.65	-1.39984	0.407191	4.627e-05	0.00268054
ENSMUSG00000078521	Aunip	110.875	-1.40107	0.672767	0.00212608	0.0427161
ENSMUSG00000009575	Cbx5	2891.86	-1.40118	0.352239	5.92142e-06	0.000501489
ENSMUSG00000022421	Nptxr	314.031	-1.40461	0.589043	0.00109014	0.0267381
ENSMUSG00000030051	Aplf	241.134	-1.40775	0.513809	0.000432355	0.013982
ENSMUSG00000022614	Lmf2	1233.1	-1.40809	0.329867	1.67931e-06	0.000180201
ENSMUSG00000030357	Fkbp4	805.985	-1.4093	0.42883	8.03237e-05	0.0042022
ENSMUSG00000020728	Cep112	1016.43	-1.42173	0.277459	2.66093e-08	5.91227e-06
ENSMUSG00000007050	Lsm2	518.402	-1.42345	0.309591	3.67341e-07	5.17732e-05
ENSMUSG00000027490	E2f1	480.334	-1.42428	0.668334	0.00192478	0.0397283
ENSMUSG00000027883	Gpsm2	210.794	-1.42622	0.504633	0.000327702	0.0115466
ENSMUSG00000026049	Tex30	248.822	-1.42832	0.628263	0.00139593	0.0313105
ENSMUSG00000056501	Cebpb	304.976	-1.4306	0.56333	0.000728891	0.0203624
ENSMUSG00000042462	Dctpp1	291.186	-1.43118	0.623101	0.00132668	0.0306204
ENSMUSG00000056531	Ccdc18	601.721	-1.43594	0.455996	0.000122092	0.0056377
ENSMUSG00000004897	Hdgf	837.384	-1.43831	0.286421	4.50536e-08	8.77198e-06
ENSMUSG00000008318	Relt	107.086	-1.43845	0.616132	0.0011863	0.0285043
ENSMUSG00000044783	A730008H23Rik	5028	-1.43955	0.285483	3.98346e-08	8.17735e-06
ENSMUSG00000028367	Txn1	921.656	-1.45058	0.50298	0.000279069	0.0101944
ENSMUSG00000028882	Ppp1r8	377.177	-1.4591	0.339009	1.39085e-06	0.000151836
ENSMUSG00000076437	Selenoh	784.153	-1.45913	0.352311	2.86825e-06	0.000277794
ENSMUSG00000040312	Cchcr1	216.129	-1.46028	0.726102	0.00242216	0.0465538
ENSMUSG00000028175	Depdc1a	118.147	-1.4617	0.648359	0.00142816	0.0317842
ENSMUSG00000028393	Alad	158.275	-1.46241	0.606533	0.00099626	0.0250204
ENSMUSG00000024590	Lmnb1	1288.45	-1.46528	0.374636	7.46084e-06	0.000601049
ENSMUSG00000045328	Cenpe	4648.67	-1.46577	0.32441	5.32271e-07	6.98088e-05
ENSMUSG00000022391	Rangap1	1367.64	-1.4668	0.469189	0.000130515	0.00586426
ENSMUSG00000023940	Sgo1	1143.36	-1.46737	0.487752	0.000189659	0.00761083
ENSMUSG00000073542	Cep76	224.858	-1.47074	0.332603	8.04351e-07	9.67578e-05
ENSMUSG00000111738	NA	68.7485	-1.47086	0.727163	0.00230527	0.0451164
ENSMUSG00000045751	Mms22l	889.532	-1.47581	0.602128	0.000902768	0.0234199
ENSMUSG00000101223	NA	188.624	-1.47829	0.448022	7.14119e-05	0.00378844
ENSMUSG00000063458	Lrmda	334.036	-1.48996	0.546527	0.000430699	0.0139523
ENSMUSG00000029166	Mapre3	165.813	-1.49235	0.67906	0.0016094	0.034777
ENSMUSG00000017550	Atad5	1805.07	-1.49636	0.475375	0.000120676	0.00558598
ENSMUSG00000026708	Cenpl	983.226	-1.49779	0.376302	5.59553e-06	0.000478178
ENSMUSG00000059791	Nrm	721.451	-1.49797	0.460743	8.55579e-05	0.00445137
ENSMUSG00000049588	Ccdc69	147.658	-1.50071	0.658017	0.00132561	0.0306204
ENSMUSG00000025395	Prim1	694.535	-1.50289	0.576665	0.000598873	0.0178115
ENSMUSG00000036928	Stag3	1023.11	-1.50474	0.33562	6.16458e-07	7.83134e-05
ENSMUSG00000061533	Cep128	1473.23	-1.50862	0.335568	5.83036e-07	7.49062e-05
ENSMUSG00000028068	Iqgap3	985.38	-1.51019	0.502703	0.00018943	0.00761083
ENSMUSG00000019961	Tmpo	6539.79	-1.53432	0.317208	1.12798e-07	1.95441e-05
ENSMUSG00000031432	Prps1	297.363	-1.53932	0.428258	2.47974e-05	0.00158218
ENSMUSG00000033373	Fntb	213.212	-1.54278	0.519225	0.00020708	0.00811392
ENSMUSG00000029101	Rgs12	154.225	-1.54297	0.383387	4.43845e-06	0.000406759
ENSMUSG00000107628	NA	103.367	-1.54806	0.767597	0.00228965	0.0450248
ENSMUSG00000117988	NA	172.49	-1.54933	0.601413	0.000635606	0.0184394
ENSMUSG00000039187	Fanci	212.723	-1.55423	0.659342	0.00109889	0.0269017
ENSMUSG00000033589	Reep4	1093.6	-1.55556	0.36976	2.09716e-06	0.00021294
ENSMUSG00000031697	Orc6	699.193	-1.55559	0.574399	0.000447243	0.014414
ENSMUSG00000020492	Ska2	392.731	-1.5629	0.457323	4.69435e-05	0.00269236
ENSMUSG00000021714	Cenpk	476.683	-1.57377	0.548891	0.000282427	0.0102773
ENSMUSG00000030465	Psd3	537.493	-1.57707	0.398888	6.05398e-06	0.000510427
ENSMUSG00000036752	Tubb4b	826.854	-1.57714	0.324043	9.56908e-08	1.70492e-05
ENSMUSG00000047003	Zfp41	499.837	-1.58286	0.510508	0.000137126	0.00606502
ENSMUSG00000022360	Atad2	5182.47	-1.58616	0.431793	1.83852e-05	0.001249
ENSMUSG00000001056	Nhp2	347.609	-1.58919	0.46	4.0775e-05	0.00239899
ENSMUSG00000028066	Pmf1	265.949	-1.59243	0.591389	0.000458334	0.0146713
ENSMUSG00000026134	Prim2	785.873	-1.5937	0.468987	5.03272e-05	0.00282881
ENSMUSG00000033952	Aspm	4082.31	-1.599	0.309415	2.01516e-08	4.58535e-06
ENSMUSG00000029366	Dck	1139.5	-1.60099	0.409737	7.29275e-06	0.000593667
ENSMUSG00000074358	Ccdc61	141.635	-1.60632	0.430406	1.42955e-05	0.00101498
ENSMUSG00000034349	Smc4	5556.72	-1.60696	0.327827	8.01e-08	1.46871e-05
ENSMUSG00000027331	Knstrn	1311.3	-1.60779	0.381531	2.06052e-06	0.000211039
ENSMUSG00000051235	Gen1	959.463	-1.62465	0.417329	7.73833e-06	0.000608942
ENSMUSG00000020513	Tubd1	211.545	-1.63752	0.38769	1.90114e-06	0.000200586
ENSMUSG00000021965	Ska3	233.344	-1.6408	0.554881	0.000210456	0.00821214
ENSMUSG00000037725	Ckap2	866.032	-1.64507	0.2856	7.22487e-10	2.43659e-07
ENSMUSG00000091844	NA	129.859	-1.65768	0.805008	0.00205679	0.0416341
ENSMUSG00000036882	Arhgap33	137.399	-1.66065	0.75138	0.00151228	0.033095
ENSMUSG00000046295	Ankle1	1454.09	-1.66554	0.367507	4.7798e-07	6.40222e-05
ENSMUSG00000029910	Mad2l1	677.081	-1.66753	0.419837	5.81532e-06	0.000494721
ENSMUSG00000026779	Mastl	972.071	-1.67195	0.394455	1.79412e-06	0.000191434
ENSMUSG00000054763	Defb42	55.4782	-1.67392	0.785765	0.00172034	0.0364242
ENSMUSG00000023015	Racgap1	1419.23	-1.67774	0.443031	1.1667e-05	0.000850742
ENSMUSG00000113255	NA	76.2374	-1.67913	0.65036	0.000598604	0.0178115
ENSMUSG00000028312	Smc2	3378.14	-1.68278	0.348164	1.11454e-07	1.94899e-05
ENSMUSG00000032254	Kif23	2146.52	-1.68307	0.299577	1.62483e-09	4.95742e-07
ENSMUSG00000030677	Kif22	692.483	-1.68509	0.325861	1.94329e-08	4.47573e-06
ENSMUSG00000024795	Kif20b	2429.15	-1.69293	0.287536	3.26081e-10	1.29187e-07
ENSMUSG00000028678	Kif2c	755.455	-1.69649	0.312647	4.91162e-09	1.38449e-06
ENSMUSG00000035455	Fignl1	606.603	-1.70162	0.428487	5.542e-06	0.000475756
ENSMUSG00000027654	Fam83d	178.591	-1.70612	0.562284	0.000163604	0.00685105
ENSMUSG00000023919	Cenpq	383.712	-1.7156	0.500155	4.38659e-05	0.00255695
ENSMUSG00000024301	Kifc5b	154.732	-1.72251	0.528618	7.83462e-05	0.00411013
ENSMUSG00000029177	Cenpa	2003.54	-1.72719	0.282318	8.15434e-11	4.05511e-08
ENSMUSG00000063450	Syne2	1836.82	-1.7333	0.364035	1.57935e-07	2.54937e-05
ENSMUSG00000042029	Ncapg2	1455.39	-1.73338	0.521649	6.39476e-05	0.0034605
ENSMUSG00000040084	Bub1b	1518.95	-1.73521	0.445659	7.55352e-06	0.000601923
ENSMUSG00000027075	Slc43a1	166.238	-1.74023	0.722367	0.0009249	0.0237655
ENSMUSG00000032400	Zwilch	695.81	-1.74288	0.560479	0.000129519	0.00585153
ENSMUSG00000034906	Ncaph	1286.79	-1.74604	0.33446	1.50073e-08	3.6337e-06
ENSMUSG00000059027	NA	59.83	-1.74968	0.754292	0.0011316	0.0274697
ENSMUSG00000096472	Cdkn2d	665.725	-1.75043	0.380695	3.46091e-07	4.92493e-05
ENSMUSG00000026669	Mcm10	446.152	-1.75292	0.67425	0.000575931	0.0174232
ENSMUSG00000027330	Cdc25b	367.745	-1.75583	0.3392	1.84569e-08	4.30343e-06
ENSMUSG00000027326	Knl1	6834.04	-1.76114	0.462036	1.04564e-05	0.000777478
ENSMUSG00000028443	Nudt2	90.8452	-1.76421	0.640496	0.000372231	0.0125315
ENSMUSG00000047534	Mis18bp1	2607.71	-1.76565	0.351319	4.19131e-08	8.31548e-06
ENSMUSG00000031004	Mki67	29994.2	-1.76976	0.295268	1.58919e-10	7.14608e-08
ENSMUSG00000027306	Nusap1	1910.75	-1.77841	0.384619	3.09217e-07	4.59832e-05
ENSMUSG00000022070	Bora	842.037	-1.78631	0.380645	2.18646e-07	3.44112e-05
ENSMUSG00000022177	Haus4	475.437	-1.79091	0.578107	0.000133112	0.00594317
ENSMUSG00000021390	Ogn	171.754	-1.79147	0.558107	9.19542e-05	0.00468099
ENSMUSG00000044847	Lsm11	291.554	-1.7949	0.461843	7.63701e-06	0.000606019
ENSMUSG00000118106	NA	184.663	-1.79501	0.561114	9.5965e-05	0.00476946
ENSMUSG00000020330	Hmmr	3276.07	-1.80873	0.379992	1.55628e-07	2.53378e-05
ENSMUSG00000020493	Prr11	1612.14	-1.81109	0.413428	9.3447e-07	0.000109617
ENSMUSG00000034773	BC030867	247.19	-1.81274	0.944797	0.00261679	0.0483923
ENSMUSG00000014633	Cmc2	159.562	-1.8171	0.782536	0.00112628	0.0273756
ENSMUSG00000003779	Kif20a	475.776	-1.81844	0.349398	1.60594e-08	3.83921e-06
ENSMUSG00000051517	Arhgef39	423.205	-1.82446	0.512482	2.71817e-05	0.00171118
ENSMUSG00000023953	Polh	812.772	-1.82611	0.363166	4.06779e-08	8.26067e-06
ENSMUSG00000037278	Tmem97	267.166	-1.82623	0.472999	8.45929e-06	0.000652091
ENSMUSG00000025758	Plk4	1732	-1.82765	0.369713	6.33392e-08	1.18438e-05
ENSMUSG00000051220	Ercc6l	650.444	-1.83322	0.627525	0.000230505	0.00886621
ENSMUSG00000068744	Psrc1	317.663	-1.83347	0.455543	4.32958e-06	0.000398871
ENSMUSG00000037544	Dlgap5	1087.39	-1.83659	0.342116	6.68097e-09	1.77714e-06
ENSMUSG00000055333	Fat2	79.3686	-1.84313	0.737502	0.00072036	0.0202753
ENSMUSG00000012443	Kif11	3517.09	-1.84531	0.368496	4.56375e-08	8.79501e-06
ENSMUSG00000028551	Cdkn2c	690.414	-1.84721	0.401403	3.36419e-07	4.85008e-05
ENSMUSG00000028044	Cks1b	532.713	-1.85998	0.577012	8.8151e-05	0.00453629
ENSMUSG00000027074	Slc43a3	1175.25	-1.86012	0.466114	5.05904e-06	0.000444395
ENSMUSG00000026039	Sgo2a	691.517	-1.86036	0.400546	2.73613e-07	4.23561e-05
ENSMUSG00000015880	Ncapg	1256.1	-1.86496	0.346339	6.02573e-09	1.62574e-06
ENSMUSG00000073705	Cenps	47.1711	-1.87539	0.972281	0.00249042	0.0469506
ENSMUSG00000062510	Nsl1	743.212	-1.87981	0.477759	6.35403e-06	0.000533344
ENSMUSG00000069910	Spdl1	485.838	-1.88287	0.434588	1.17095e-06	0.000133057
ENSMUSG00000022422	Dscc1	215.092	-1.88339	0.785219	0.000934505	0.0239395
ENSMUSG00000021707	Dhfr	320.027	-1.88416	0.759424	0.000769435	0.020969
ENSMUSG00000020897	Aurkb	997.877	-1.88831	0.496127	1.05556e-05	0.00078178
ENSMUSG00000111421	NA	77.6974	-1.89086	0.594013	9.74402e-05	0.00483007
ENSMUSG00000087213	2810408I11Rik	47.8446	-1.90215	0.936839	0.00205177	0.041629
ENSMUSG00000024660	Incenp	1654.74	-1.90293	0.328585	5.92732e-10	2.07303e-07
ENSMUSG00000001228	Uhrf1	442.032	-1.91098	0.713172	0.000456365	0.0146493
ENSMUSG00000054717	Hmgb2	594.082	-1.91685	0.361267	9.30491e-09	2.44073e-06
ENSMUSG00000041498	Kif14	992.365	-1.92833	0.422911	4.16337e-07	5.75875e-05
ENSMUSG00000036181	H1f2	440.745	-1.93271	0.486207	5.32813e-06	0.000463473
ENSMUSG00000098318	Lockd	673.626	-1.93755	0.451289	1.41385e-06	0.00015346
ENSMUSG00000030978	Rrm1	2224.25	-1.94712	0.406837	1.39164e-07	2.30549e-05
ENSMUSG00000020471	Pold2	300.355	-1.94863	0.519396	1.29619e-05	0.000923768
ENSMUSG00000044201	Cdc25c	373.46	-1.95634	0.535274	1.86562e-05	0.00126287
ENSMUSG00000006715	Gmnn	394.879	-1.95641	0.613571	9.83087e-05	0.0048518
ENSMUSG00000058385	H2bc8	98.9712	-1.95914	0.709116	0.000355426	0.0122338
ENSMUSG00000036768	Kif15	4543.91	-1.96252	0.385812	3.01934e-08	6.55439e-06
ENSMUSG00000024268	Celf4	93.5724	-1.96362	0.866469	0.00124858	0.0295468
ENSMUSG00000028884	Rpa2	458.019	-1.97386	0.59569	6.42133e-05	0.00346495
ENSMUSG00000020808	Pimreg	499.638	-1.97658	0.505474	6.98045e-06	0.000570705
ENSMUSG00000027115	Kif18a	1053.91	-1.98137	0.405426	8.37738e-08	1.5213e-05
ENSMUSG00000087014	NA	69.5173	-1.98525	0.775429	0.000611707	0.0180974
ENSMUSG00000028832	Stmn1	201.492	-1.98848	0.591281	5.36391e-05	0.0029795
ENSMUSG00000001403	Ube2c	1718.57	-1.994	0.299453	2.39126e-12	2.37691e-09
ENSMUSG00000021176	Efcab11	259.543	-2.00271	0.546975	1.818e-05	0.00123952
ENSMUSG00000024056	Ndc80	1576.67	-2.00704	0.449097	6.2578e-07	7.87899e-05
ENSMUSG00000021697	Depdc1b	164.749	-2.00787	0.521134	8.50897e-06	0.000653254
ENSMUSG00000041431	Ccnb1	481.03	-2.01274	0.310271	7.50558e-12	6.16306e-09
ENSMUSG00000036777	Anln	4059.77	-2.02683	0.344809	3.54596e-10	1.36671e-07
ENSMUSG00000078773	Rad54b	323.19	-2.02868	0.51721	6.5751e-06	0.000549457
ENSMUSG00000044966	Fbxo48	325.021	-2.03035	0.408355	5.35306e-08	1.01098e-05
ENSMUSG00000031756	Cenpn	575.539	-2.03945	0.392742	1.72477e-08	4.07176e-06
ENSMUSG00000007080	Pole	1070.75	-2.04224	1.07313	0.00260253	0.0482349
ENSMUSG00000022021	Diaph3	1359.53	-2.04881	0.476679	1.35446e-06	0.000148723
ENSMUSG00000028614	Ndc1	942.581	-2.05907	0.458955	5.76028e-07	7.45128e-05
ENSMUSG00000034311	Kif4	1124.61	-2.07011	0.337559	7.33516e-11	3.84811e-08
ENSMUSG00000037466	Tedc1	386.051	-2.07201	0.509428	3.6506e-06	0.000346458
ENSMUSG00000032193	Ldlr	623.525	-2.07718	0.476962	1.04598e-06	0.000120877
ENSMUSG00000024989	Cep55	702.666	-2.08072	0.367106	1.22856e-09	3.93263e-07
ENSMUSG00000027699	Ect2	1353.62	-2.10616	0.438287	1.25419e-07	2.13394e-05
ENSMUSG00000026955	Sapcd2	104.662	-2.11054	0.662136	9.45621e-05	0.00473713
ENSMUSG00000068205	Macrod2	24.6162	-2.1165	0.963544	0.0013629	0.030863
ENSMUSG00000034206	Polq	969.056	-2.11714	0.469264	5.1539e-07	6.80675e-05
ENSMUSG00000039396	Neil3	1177.03	-2.11743	0.486246	1.04965e-06	0.000120877
ENSMUSG00000109910	NA	157.061	-2.11776	0.67294	0.000110077	0.00519728
ENSMUSG00000034883	Lrr1	196.058	-2.11884	0.89277	0.0009783	0.0248002
ENSMUSG00000043631	Ecm2	269.88	-2.12306	0.502639	1.85418e-06	0.000196731
ENSMUSG00000087060	NA	175.86	-2.12471	0.509909	2.30933e-06	0.000230762
ENSMUSG00000029516	Cit	1232.01	-2.13954	0.312047	6.20694e-13	8.37316e-10
ENSMUSG00000024378	Stard4	270.949	-2.14221	0.393797	4.39193e-09	1.25676e-06
ENSMUSG00000027323	Rad51	655.587	-2.14417	0.559784	9.60787e-06	0.000728732
ENSMUSG00000027811	4930579G24Rik	182.935	-2.14521	0.66993	9.22891e-05	0.00468541
ENSMUSG00000034329	Brip1	1166.28	-2.14939	0.480622	6.17849e-07	7.83134e-05
ENSMUSG00000046591	Ticrr	923.963	-2.15342	0.465816	3.0495e-07	4.57086e-05
ENSMUSG00000040204	Pclaf	629.406	-2.16418	0.490187	8.00034e-07	9.67578e-05
ENSMUSG00000026683	Nuf2	906.431	-2.16442	0.430762	4.15855e-08	8.31548e-06
ENSMUSG00000026196	Bard1	569.053	-2.18403	0.480307	4.32631e-07	5.92077e-05
ENSMUSG00000020439	Smtn	94.4161	-2.1845	0.629631	3.64147e-05	0.00217744
ENSMUSG00000048327	Ckap2l	2523.04	-2.20217	0.326877	1.37526e-12	1.44295e-09
ENSMUSG00000025747	Tyms	1228.6	-2.20429	0.466217	1.83582e-07	2.93825e-05
ENSMUSG00000029283	Cdc7	655.702	-2.21279	0.373596	2.69945e-10	1.13293e-07
ENSMUSG00000027469	Tpx2	1821.66	-2.2173	0.357095	4.63638e-11	2.88488e-08
ENSMUSG00000007646	Rad51c	117.419	-2.22155	0.670625	6.21454e-05	0.00338236
ENSMUSG00000022033	Pbk	1054.3	-2.22458	0.985699	0.00127619	0.0299779
ENSMUSG00000027379	Bub1	1548.17	-2.22618	0.352155	2.27345e-11	1.59023e-08
ENSMUSG00000027715	Ccna2	2573.27	-2.23649	0.338426	3.42088e-12	3.07652e-09
ENSMUSG00000017716	Birc5	1327.08	-2.25374	0.429438	1.28911e-08	3.24932e-06
ENSMUSG00000038379	Ttk	788.526	-2.25513	0.541133	2.39471e-06	0.000234376
ENSMUSG00000051378	Kif18b	515.476	-2.25688	0.439581	2.34209e-08	5.26581e-06
ENSMUSG00000024665	Fads2	138.588	-2.26075	0.651091	3.64328e-05	0.00217744
ENSMUSG00000000028	Cdc45	425.795	-2.26114	0.510164	7.42502e-07	9.04703e-05
ENSMUSG00000030346	Rad51ap1	1014.75	-2.27078	0.510186	6.83641e-07	8.49424e-05
ENSMUSG00000026429	Ube2t	341.362	-2.2773	0.568316	4.70191e-06	0.000420854
ENSMUSG00000020914	Top2a	12305.3	-2.2822	0.368552	5.12871e-11	3.0269e-08
ENSMUSG00000028718	Stil	1812.97	-2.30591	0.426583	5.49252e-09	1.52547e-06
ENSMUSG00000027496	Aurka	497.772	-2.31035	0.568362	3.69613e-06	0.000347531
ENSMUSG00000097755	NA	178.666	-2.31091	0.590292	6.67217e-06	0.000551018
ENSMUSG00000028212	Ccne2	983.968	-2.31341	0.503533	3.46826e-07	4.92493e-05
ENSMUSG00000017146	Brca1	1134.69	-2.31388	0.506334	3.96544e-07	5.54751e-05
ENSMUSG00000034317	Trim59	666.023	-2.3162	0.375484	5.90313e-11	3.27902e-08
ENSMUSG00000048922	Cdca2	1646.32	-2.32274	0.354911	5.28696e-12	4.53861e-09
ENSMUSG00000038252	Ncapd2	1451.56	-2.32475	0.399889	5.28391e-10	1.88287e-07
ENSMUSG00000039081	Zfp503	115.747	-2.32656	0.736304	0.000104769	0.005022
ENSMUSG00000029864	Gstk1	92.9798	-2.33281	0.605225	8.34985e-06	0.000648952
ENSMUSG00000039748	Exo1	338.908	-2.3429	0.462192	3.29397e-08	6.8574e-06
ENSMUSG00000019773	Fbxo5	771.616	-2.34453	0.446772	1.29037e-08	3.24932e-06
ENSMUSG00000020649	Rrm2	1109.02	-2.34751	0.94388	0.000739783	0.0205287
ENSMUSG00000002055	Spag5	1223.2	-2.35396	0.420758	1.90163e-09	5.70065e-07
ENSMUSG00000044469	Tnfaip8l1	99.3529	-2.35789	0.495385	1.49349e-07	2.45271e-05
ENSMUSG00000021569	Trip13	273.979	-2.36039	0.4894	1.14771e-07	1.97052e-05
ENSMUSG00000008734	Gprc5b	23.9837	-2.36353	1.28496	0.00267173	0.0488937
ENSMUSG00000001517	Foxm1	1617.39	-2.3669	0.336631	1.83438e-13	3.84934e-10
ENSMUSG00000021391	Cenpp	215.425	-2.37713	0.620731	9.6994e-06	0.000729812
ENSMUSG00000032783	Troap	353.43	-2.39443	0.472019	3.30416e-08	6.8574e-06
ENSMUSG00000045273	Cenph	330.368	-2.42557	0.609569	5.34984e-06	0.000463473
ENSMUSG00000037313	Tacc3	1042.17	-2.42965	0.3763	9.522e-12	7.49302e-09
ENSMUSG00000019992	Mtfr2	245.244	-2.45882	0.58374	1.98847e-06	0.000206793
ENSMUSG00000024206	Rfx2	164.986	-2.46316	0.543374	4.63831e-07	6.25709e-05
ENSMUSG00000072082	Ccnf	1121.19	-2.46719	0.402308	8.15917e-11	4.05511e-08
ENSMUSG00000060678	H4c3	101.703	-2.46916	0.560014	8.12107e-07	9.70725e-05
ENSMUSG00000027327	1700037H04Rik	211.337	-2.47413	0.784551	0.000109448	0.00518056
ENSMUSG00000079553	Kifc1	362.325	-2.48601	0.440833	1.4553e-09	4.58079e-07
ENSMUSG00000005233	Spc25	420.009	-2.51458	0.542227	2.87495e-07	4.35522e-05
ENSMUSG00000035683	Melk	364.713	-2.52181	0.481957	1.39871e-08	3.46564e-06
ENSMUSG00000019845	Tube1	208.747	-2.53301	0.508373	5.0898e-08	9.7097e-06
ENSMUSG00000107263	NA	40.1213	-2.53807	1.28363	0.00208497	0.0420692
ENSMUSG00000047757	Fancb	235.637	-2.54141	0.552461	3.21783e-07	4.67477e-05
ENSMUSG00000023908	Pkmyt1	132.364	-2.55078	0.749843	4.69415e-05	0.00269236
ENSMUSG00000071516	H2ac13	31.1852	-2.55593	1.07012	0.000908072	0.0234608
ENSMUSG00000112026	NA	33.751	-2.55969	0.906611	0.000277826	0.0101884
ENSMUSG00000028909	Ptpru	69.6636	-2.56019	0.661021	7.68319e-06	0.000607132
ENSMUSG00000023345	Poc1a	221.228	-2.58466	0.382596	1.24095e-12	1.37862e-09
ENSMUSG00000108239	Gm19434	21.625	-2.58784	1.39386	0.00255256	0.0478251
ENSMUSG00000025912	Mybl1	876.39	-2.60311	0.430671	1.33509e-10	6.14987e-08
ENSMUSG00000024791	Cdca5	225.502	-2.60503	0.667932	7.41637e-06	0.000601049
ENSMUSG00000035007	Rundc1	1611.16	-2.61193	0.512559	2.89073e-08	6.34817e-06
ENSMUSG00000051627	H1f4	822.497	-2.63842	0.455369	6.10103e-10	2.09498e-07
ENSMUSG00000019942	Cdk1	812.965	-2.64491	0.425883	4.73532e-11	2.88488e-08
ENSMUSG00000050410	Tcf19	673.424	-2.64662	0.560637	1.97984e-07	3.14213e-05
ENSMUSG00000022322	Shcbp1	713.968	-2.65846	0.40045	2.83514e-12	2.67722e-09
ENSMUSG00000028873	Cdca8	1039.04	-2.66839	0.422674	2.47159e-11	1.6096e-08
ENSMUSG00000061615	H2ac4	56.0229	-2.6716	1.12168	0.000916871	0.0236235
ENSMUSG00000005470	Asf1b	530.445	-2.69959	0.561279	1.28195e-07	2.14255e-05
ENSMUSG00000037151	Lrrc20	96.8142	-2.70649	1.06108	0.000628561	0.0183122
ENSMUSG00000069300	H2bc11	43.6241	-2.70927	0.855873	0.000101268	0.004887
ENSMUSG00000030867	Plk1	657.465	-2.72351	0.375459	3.72777e-14	9.68773e-11
ENSMUSG00000069268	H2bc7	45.1392	-2.74617	1.06657	0.000584594	0.0176087
ENSMUSG00000098176	Ccdc166	134.413	-2.75607	0.707941	7.53509e-06	0.000601923
ENSMUSG00000069301	H2ac11	15.6088	-2.78863	1.42362	0.00213646	0.0428335
ENSMUSG00000093726	NA	133.755	-2.7962	0.82875	5.26954e-05	0.0029444
ENSMUSG00000060093	H4c1	46.6147	-2.7979	1.0588	0.000494092	0.0154494
ENSMUSG00000100210	H3c7	50.1169	-2.79964	0.888721	0.000105297	0.00503454
ENSMUSG00000103952	NA	124.043	-2.8181	0.764158	1.73035e-05	0.00118834
ENSMUSG00000020185	E2f7	433.341	-2.86	0.659459	1.20985e-06	0.000135203
ENSMUSG00000022034	Esco2	1183.83	-2.869	0.468743	8.67575e-11	4.20129e-08
ENSMUSG00000019214	Chtf18	105.279	-2.88097	1.19291	0.0008811	0.0230665
ENSMUSG00000047632	Fgfbp3	173.413	-2.89395	0.782692	1.65006e-05	0.00114993
ENSMUSG00000021485	Mxd3	203.939	-2.91052	0.498464	4.79652e-10	1.77622e-07
ENSMUSG00000049932	H2afx	1515.63	-2.91685	0.377855	1.21707e-15	7.66185e-12
ENSMUSG00000042489	Clspn	772.832	-2.91779	0.505937	7.53778e-10	2.49752e-07
ENSMUSG00000030086	Chchd6	60.9588	-2.91969	0.815651	2.45023e-05	0.00156864
ENSMUSG00000006462	A530013C23Rik	77.5022	-2.96984	0.744133	5.04881e-06	0.000444395
ENSMUSG00000061603	Akap6	52.9433	-3.01422	1.37744	0.00138943	0.0312972
ENSMUSG00000038020	Rapgefl1	37.9026	-3.01861	1.07417	0.000307228	0.0109661
ENSMUSG00000113128	NA	39.2004	-3.03187	1.25565	0.000851752	0.0224982
ENSMUSG00000036223	Ska1	170.263	-3.05821	0.549381	2.34921e-09	6.82573e-07
ENSMUSG00000085042	Abhd11os	42.9558	-3.07838	1.0188	0.000161054	0.00678029
ENSMUSG00000061482	H4c4	1754.54	-3.08107	0.453412	1.07044e-12	1.26352e-09
ENSMUSG00000024654	Asrgl1	154.545	-3.08703	0.710122	1.19162e-06	0.000133958
ENSMUSG00000074476	Spc24	161.711	-3.14231	0.581581	5.80319e-09	1.58839e-06
ENSMUSG00000023505	Cdca3	902.381	-3.14959	0.453829	3.80473e-13	7.1856e-10
ENSMUSG00000069270	H2ac6	53.1927	-3.19191	0.903602	2.99585e-05	0.00185507
ENSMUSG00000062727	H2bc12	43.1726	-3.20099	0.790871	4.08495e-06	0.000380042
ENSMUSG00000079550	Mpp4	34.4182	-3.20549	1.16247	0.000347608	0.0120901
ENSMUSG00000069273	H3c6	107.125	-3.20685	0.836627	1.01073e-05	0.000754492
ENSMUSG00000017861	Mybl2	146.623	-3.21619	0.788059	3.71184e-06	0.000347531
ENSMUSG00000069310	H3c3	62.6882	-3.22945	0.895809	2.30607e-05	0.00149152
ENSMUSG00000094338	H2bc13	162.731	-3.34313	0.656338	3.20932e-08	6.8574e-06
ENSMUSG00000068855	H2ac20	140.179	-3.3527	0.639172	1.41297e-08	3.46564e-06
ENSMUSG00000058773	H1f5	824.292	-3.36966	0.553376	1.14801e-10	5.42031e-08
ENSMUSG00000114456	H2bc9	73.2418	-3.409	0.772456	8.19738e-07	9.73684e-05
ENSMUSG00000091405	H4c14	144.733	-3.43131	0.609127	1.62745e-09	4.95742e-07
ENSMUSG00000085423	NA	68.5987	-3.55212	0.890691	5.43028e-06	0.000468293
ENSMUSG00000027134	Lpcat4	92.0022	-3.60907	0.778861	3.17941e-07	4.65476e-05
ENSMUSG00000052565	H1f3	346.381	-3.63601	0.500898	4.04307e-14	9.68773e-11
ENSMUSG00000113147	NA	16.3664	-3.68332	1.42	0.000555425	0.0169463
ENSMUSG00000068101	Cenpm	98.2535	-3.70769	0.816678	5.05503e-07	6.72319e-05
ENSMUSG00000051727	Kctd14	22.572	-3.7132	1.37484	0.000419279	0.0137175
ENSMUSG00000114279	H2bc14	325.38	-3.72623	0.622872	2.28371e-10	1.00303e-07
ENSMUSG00000111617	NA	77.2732	-3.75132	0.91717	3.56451e-06	0.000339997
ENSMUSG00000042035	Igsf3	17.1561	-3.77445	1.40121	0.000427478	0.0138956
ENSMUSG00000087742	NA	54.5761	-3.86632	0.679739	1.13282e-09	3.68868e-07
ENSMUSG00000063021	H2ac15	248.169	-3.94561	0.572512	5.93931e-13	8.37316e-10
ENSMUSG00000049539	H1f1	503.363	-3.96272	0.57002	4.18783e-13	7.19013e-10
ENSMUSG00000101972	H3c11	35.1583	-4.00446	1.05968	1.20478e-05	0.000874339
ENSMUSG00000067455	H4c11	20.8503	-4.16681	1.33992	0.000129227	0.00585153
ENSMUSG00000019124	Scrn1	18.7524	-4.62964	1.39465	6.19185e-05	0.00338236
ENSMUSG00000075031	H2bc3	208.125	-5.06713	0.471026	7.85369e-28	7.41624e-24
ENSMUSG00000114515	NA	22.4336	-5.4607	1.28924	2.18808e-06	0.000220985
ENSMUSG00000108728	NA	22.9639	-7.16849	1.89402	3.40613e-06	0.000328205
ENSMUSG00000064360	ND3	397.538	-9.55037	0.718738	1.45096e-40	2.74028e-36
